# Supplementary material for: Syncytiotrophoblast Markers Are Downregulated in Placentas from Idiopathic Stillbirths
Source: MDPI journal article supplement (doi:10.3390/ijms25105180), 2024-05-09
Supplement: s1 [file s1]

## Supplementary Figures

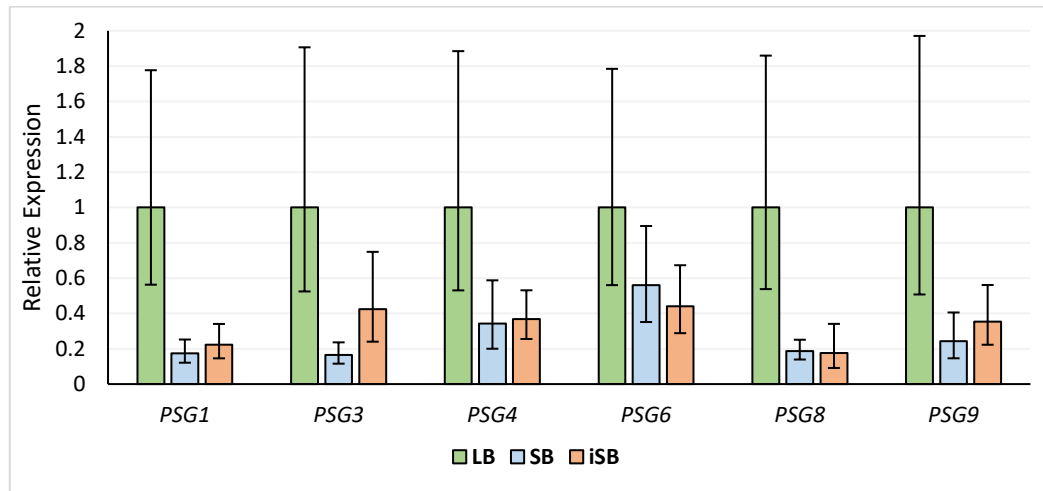

**Figure S1:** Relative expression of *PSG* genes in placentas from 9 live births (LB), 13 stillbirths (SB) and 12 idiopathic stillbirths (iSB), by real-time qPCR. Three housekeeping genes (*ACTB*, *TBP* and *RPLP0*) were used to normalized the results. Bars represent  $2^{\Delta\Delta C_t} \pm \text{SEM}$ .

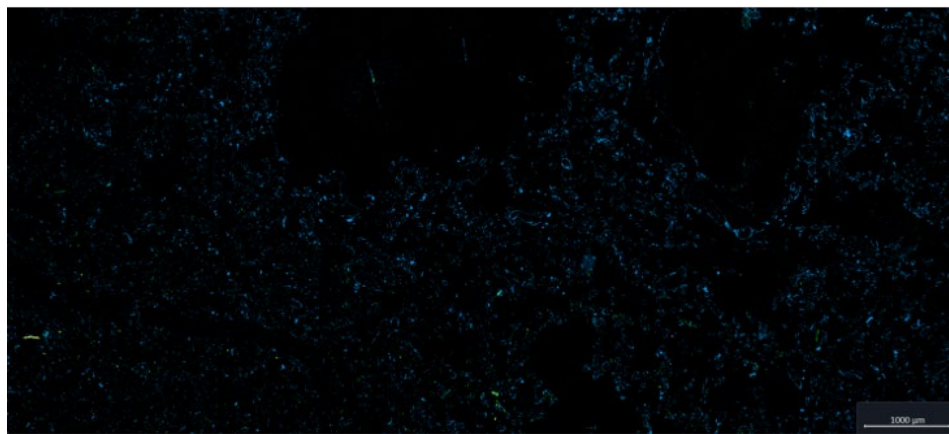

**Figure S2:** Negative control for Ki67, HLA-G, and COL1 immunofluorescent staining was obtained by omitting the primary antibodies; no signs of fluorescence were detected.
