# Supplementary material for: Syncytiotrophoblast Markers Are Downregulated in Placentas from Idiopathic Stillbirths
Source: MDPI journal article supplement (doi:10.3390/ijms25105180), 2024-05-09
Supplement: s1 [file s1]

**Table 1: Sample characteristics.** The two-tailed Student's t-test was used to statistically compare groups for each variable. Data are given as mean  $\pm$  standard deviation. iSB: idiopathic stillbirth; SB: stillbirth; LB: live birth.; M: male; F: Female.

| Variable                | LB<br>(n=3)        | SB<br>(n=5)        | iSB<br>(n=4)       | LB vs SB<br>p value | iSB vs SB<br>p value | iSB vs LB<br>p value |
|-------------------------|--------------------|--------------------|--------------------|---------------------|----------------------|----------------------|
| Maternal age (years)    | 31.333 $\pm$ 5.774 | 30.200 $\pm$ 3.834 | 33.750 $\pm$ 7.089 | 0.746               | 0.366                | 0.652                |
| Gestational age (weeks) | 37.333 $\pm$ 0.577 | 33.000 $\pm$ 4.848 | 32.250 $\pm$ 3.862 | 0.186               | 0.809                | 0.078                |
