# Supplementary material for: Syncytiotrophoblast Markers Are Downregulated in Placentas from Idiopathic Stillbirths
Source: Int J Mol Sci. 2024 May 9;25(10):5180. doi: 10.3390/ijms25105180 (PMC11121380; doi:10.3390/ijms25105180)
Supplement: Supplementary file 1 [file ijms-25-05180-s001.zip]

Archive with 6 entries (6 files):
- Supplemental Table S1.pdf
- Supplemental Table S2.xlsx
- Supplemental Table S3.xlsx
- Supplemental Table S4.xlsx
- Supplemental Table S5.xlsx
- Supplementary Figures S1 and S2.pdf
