# Supplementary material for: Syncytiotrophoblast Markers Are Downregulated in Placentas from Idiopathic Stillbirths
Source: Int J Mol Sci. 2024 May 9;25(10):5180. doi: 10.3390/ijms25105180 (PMC11121380; doi:10.3390/ijms25105180)
Supplement: Supplementary file 1 [file ijms-25-05180-s001.zip › Supplemental Table S2.xlsx]

## Sheet: DEGs SB vs LB
Ensembl ID	geneId	avgLog2CPM	avgLog2FC	P.Value	FDR	DE	chromosome	startPos	endPos	geneStrand	geneLength	exonLength	geneGC	exonGC	intronGC	geneType
CCL4L2	ENSG00000276070	2.42212	-6.96896	1.94863e-07	0.000124618	-1	17	36210924	36212878	+	1955	1395	0.490276	0.509677	0.44186	protein_coding
CXCL3	ENSG00000163734	1.02489	-6.54992	3.55765e-05	0.00467495	-1	4	74036589	74038807	-	2219	2218	0.476105	0.476105	0	protein_coding
CD5L	ENSG00000073754	0.720773	-6.46019	1.4502e-05	0.00269458	-1	1	157830911	157898256	-	67346	2461	0.396882	0.488826	0.393394	protein_coding
DUSP2	ENSG00000158050	2.00662	-6.2159	2.60338e-06	0.000898352	-1	2	96143169	96145440	-	2272	1925	0.636724	0.635844	0.641618	protein_coding
CCL3L1	ENSG00000276085	1.80284	-5.99873	0.000266678	0.018231	-1	17	36194869	36196758	-	1890	1467	0.527263	0.503067	0.611374	protein_coding
TRBC1	ENSG00000211751	-0.122942	-5.89627	0.000855866	0.0365901	-1	7	142791694	142793368	+	1675	756	0.543011	0.571429	0.519608	TR_C_gene
ENSG00000275016	ENSG00000275016	-0.0125096	-5.62658	0.000432757	0.0242106	-1	15	95638316	95826499	+	188184	8227	0.372717	0.376687	0.372536	lncRNA
MARCO	ENSG00000019169	2.61438	-5.60527	4.26649e-05	0.00523264	-1	2	118942194	118994660	+	52467	2033	0.443297	0.567142	0.438304	protein_coding
RGS1	ENSG00000090104	3.7894	-5.46669	1.81808e-05	0.00306421	-1	1	192575763	192580024	+	4262	4071	0.337949	0.340457	0.284211	protein_coding
SIGLEC10	ENSG00000142512	2.42104	-5.41028	2.84228e-06	0.000915403	-1	19	51410020	51417803	-	7784	3659	0.539381	0.569281	0.512852	protein_coding
CHI3L2	ENSG00000064886	2.3503	-5.34057	1.84574e-05	0.00307475	-1	1	111200771	111243440	+	42670	3280	0.446343	0.466159	0.444693	protein_coding
CHRNA1	ENSG00000138435	0.883383	-5.33256	9.08992e-06	0.00202233	-1	2	174747592	174787935	-	40344	4965	0.444513	0.461027	0.442196	protein_coding
NR5A2	ENSG00000116833	0.438347	-5.12072	2.19499e-05	0.00327959	-1	1	200027614	200177420	+	149807	7531	0.407	0.422387	0.406185	protein_coding
IL24	ENSG00000162892	0.357771	-5.1001	0.000296945	0.0194734	-1	1	206897443	206904139	+	6697	1972	0.484618	0.472617	0.489627	protein_coding
CCL4	ENSG00000275302	4.0297	-5.06436	1.72513e-07	0.000119059	-1	17	36103827	36105621	+	1795	1794	0.485507	0.485507	0	protein_coding
CD69	ENSG00000110848	1.62949	-5.04896	9.08685e-05	0.00888023	-1	12	9752486	9760901	-	8416	2828	0.353417	0.344059	0.358153	protein_coding
HSD3BP5	ENSG00000198857	1.83378	-4.98854	8.80933e-05	0.00874477	-1	1	119601340	119609250	+	7911	1129	0.457901	0.504872	0.450081	transcribed_unprocessed_pseudogene
CCR5	ENSG00000160791	0.904573	-4.86397	0.00139708	0.0496273	-1	3	46370854	46376206	+	5353	3670	0.435351	0.443597	0.41736	protein_coding
APOBEC3A	ENSG00000128383	0.616944	-4.81512	0.00118603	0.0445313	-1	22	38952741	38992778	+	40038	2351	0.532408	0.514675	0.533514	protein_coding
CCL3	ENSG00000277632	4.83142	-4.78744	3.59539e-08	3.25675e-05	-1	17	36088256	36090169	-	1914	1492	0.522216	0.50067	0.598575	protein_coding
MPO	ENSG00000005381	0.749103	-4.75889	3.9258e-05	0.00486296	-1	17	58269855	58280935	-	11081	3515	0.551264	0.587198	0.534567	protein_coding
LYZ	ENSG00000090382	5.40319	-4.73086	9.81442e-05	0.00929676	-1	12	69348381	69354234	+	5854	1720	0.365454	0.398256	0.351803	protein_coding
CD83	ENSG00000112149	4.11496	-4.45891	1.30802e-07	9.47859e-05	-1	6	14117256	14136918	+	19663	2378	0.451734	0.46005	0.45059	protein_coding
CD300E	ENSG00000186407	1.93199	-4.39859	0.000133122	0.0110881	-1	17	74609885	74623738	-	13854	3749	0.508049	0.518538	0.504157	protein_coding
IL1R2	ENSG00000115590	1.34304	-4.38401	0.000672396	0.0312783	-1	2	101991960	102028544	+	36585	2945	0.446288	0.458744	0.445198	protein_coding
CXCL8	ENSG00000169429	4.624	-4.37355	0.000712	0.0326551	-1	4	73740541	73743716	+	3176	2236	0.31937	0.320662	0.316294	protein_coding
PTPN7	ENSG00000143851	1.39171	-4.25518	0.000637225	0.0303458	-1	1	202147013	202161588	-	14576	5897	0.529125	0.565542	0.504379	protein_coding
CHI3L1	ENSG00000133048	3.86975	-4.19607	1.81827e-05	0.00306421	-1	1	203178931	203186704	-	7774	3355	0.547922	0.551118	0.545496	protein_coding
ZP2	ENSG00000103310	1.86273	-4.11073	0.000100659	0.00934205	-1	16	21197450	21214510	-	17061	3435	0.449883	0.483261	0.441468	protein_coding
TNC	ENSG00000041982	3.32441	-4.04399	1.37296e-05	0.0026182	-1	9	115019575	115118257	-	98683	9606	0.418496	0.51853	0.407708	protein_coding
RASD1	ENSG00000108551	2.39924	-3.97479	4.39054e-06	0.00116915	-1	17	17494437	17496395	-	1959	1746	0.629213	0.616266	0.735849	protein_coding
RSPO2	ENSG00000147655	3.76643	-3.92782	6.88274e-09	8.31263e-06	-1	8	107899316	108083642	-	184327	4344	0.37744	0.472836	0.375138	protein_coding
FPR3	ENSG00000187474	2.55318	-3.84987	0.000160585	0.0128419	-1	19	51795157	51826190	+	31034	2776	0.427609	0.431916	0.427186	protein_coding
TNF	ENSG00000232810	2.69653	-3.76645	6.94162e-05	0.00739742	-1	6	31575565	31578336	+	2772	1674	0.528329	0.543011	0.505925	protein_coding
BCL2A1	ENSG00000140379	2.1582	-3.70898	0.000941727	0.0388845	-1	15	79960892	79971196	-	10305	992	0.384705	0.390121	0.384128	protein_coding
TAGAP	ENSG00000164691	2.98234	-3.66772	2.22593e-05	0.00329187	-1	6	159034468	159045152	-	10685	4079	0.424186	0.470704	0.395458	protein_coding
SDS	ENSG00000135094	1.54194	-3.64413	0.000983606	0.0401561	-1	12	113392445	113426301	-	33857	2996	0.500502	0.567423	0.494005	protein_coding
SERPINA1	ENSG00000197249	4.44151	-3.60713	0.000429126	0.0241551	-1	14	94376747	94390693	-	13947	4893	0.517998	0.541999	0.505026	protein_coding
IL4I1	ENSG00000104951	2.63166	-3.51352	0.000507365	0.026546	-1	19	49889654	49929539	-	39886	2483	0.548828	0.610149	0.544757	protein_coding
EGR2	ENSG00000122877	2.99757	-3.51127	0.000114821	0.0102723	-1	10	62811996	62919900	-	107905	4052	0.426407	0.535538	0.422149	protein_coding
PDE1B	ENSG00000123360	2.07544	-3.44924	4.41957e-06	0.00116915	-1	12	54549601	54579239	+	29639	7350	0.492948	0.527755	0.48147	protein_coding
ANOS1	ENSG00000011201	0.880126	-3.39309	0.000540456	0.0273875	-1	X	8528874	8732137	-	203264	7067	0.395886	0.403566	0.395609	protein_coding
DOCK10	ENSG00000135905	3.41411	-3.35861	4.39878e-05	0.00531263	-1	2	224765090	225042468	-	277379	11226	0.393744	0.419384	0.392663	protein_coding
MMP9	ENSG00000100985	2.44209	-3.33219	0.000171973	0.0132575	-1	20	46008908	46016561	+	7654	2323	0.56945	0.623332	0.545966	protein_coding
SOD2	ENSG00000112096	8.14178	-3.2783	1.17654e-06	0.000516715	-1	6	159669069	159762529	-	93461	18133	0.423047	0.436442	0.419823	protein_coding
SLCO3A1	ENSG00000176463	1.66368	-3.27093	0.000920935	0.0381515	-1	15	91853708	92172435	+	318728	9403	0.451164	0.494736	0.449839	protein_coding
HAPLN3	ENSG00000140511	2.53703	-3.221	0.00138651	0.0495857	-1	15	88877294	88895597	-	18304	3482	0.528165	0.576106	0.516902	protein_coding
GPRC5A	ENSG00000013588	4.458	-3.21094	1.97765e-07	0.000124618	-1	12	12891559	12917937	+	26379	7659	0.463227	0.485311	0.454191	protein_coding
HK2	ENSG00000159399	4.1838	-3.19009	0.000412503	0.0237005	-1	2	74834127	74893359	+	59233	5899	0.475554	0.511104	0.471622	protein_coding
SYPL2	ENSG00000143028	2.11641	-3.10683	0.000125076	0.0109157	-1	1	109466546	109482134	+	15589	4036	0.492751	0.54559	0.47429	protein_coding
CLEC7A	ENSG00000172243	3.42179	-3.10279	0.000127286	0.0109157	-1	12	10116777	10130258	-	13482	4185	0.37423	0.379689	0.371773	protein_coding
ITGAX	ENSG00000140678	4.15363	-3.09545	0.000738673	0.0333703	-1	16	31355134	31382999	+	27866	7048	0.522017	0.556612	0.510304	protein_coding
PTGER4	ENSG00000171522	4.03686	-3.07771	1.24723e-05	0.00241014	-1	5	40679915	40693735	+	13821	3540	0.419609	0.493785	0.394066	protein_coding
LIF	ENSG00000128342	2.42211	-3.07609	0.000284527	0.019091	-1	22	30240453	30246759	-	6307	3868	0.588963	0.570838	0.617719	protein_coding
NR4A2	ENSG00000153234	4.39925	-3.05192	3.32938e-05	0.00442686	-1	2	156324437	156342348	-	17912	3953	0.45151	0.490514	0.440464	protein_coding
ITGAL	ENSG00000005844	4.57133	-2.99414	1.96872e-05	0.00319874	-1	16	30472658	30523567	+	50910	9833	0.504469	0.532391	0.497785	protein_coding
FOSB	ENSG00000125740	9.92951	-2.99268	5.29525e-05	0.0059924	-1	19	45467995	45475179	+	7185	5550	0.575724	0.568288	0.600979	protein_coding
FCGBP	ENSG00000275395	7.63485	-2.95586	1.56503e-05	0.00287114	-1	19	39863323	39934626	-	71304	12932	0.514144	0.629756	0.48853	protein_coding
EVI2B	ENSG00000185862	2.57882	-2.93501	0.00125593	0.046316	-1	17	31303770	31314105	-	10336	2058	0.371166	0.364431	0.37284	protein_coding
RN7SL473P	ENSG00000277452	1.36506	-2.9153	0.0006381	0.0303458	-1	1	150566562	150566860	-	299	298	0.530201	0.530201	0	misc_RNA
MAB21L3	ENSG00000173212	2.32365	-2.89377	0.000215213	0.0157425	-1	1	116111399	116138149	+	26751	6622	0.430019	0.439142	0.427017	protein_coding
CEMIP	ENSG00000103888	3.24376	-2.85902	0.000238057	0.0169126	-1	15	80779343	80951776	+	172434	7591	0.470299	0.527862	0.467648	protein_coding
RAC2	ENSG00000128340	4.0367	-2.82672	3.89578e-05	0.00486296	-1	22	37225270	37244448	-	19179	2515	0.576546	0.598012	0.573306	protein_coding
LILRB2	ENSG00000131042	3.89379	-2.82452	0.00106736	0.0425889	-1	19	54273812	54281184	-	7373	3805	0.577048	0.548489	0.607513	protein_coding
LOX	ENSG00000113083	3.35889	-2.77561	0.000313455	0.0201014	-1	5	122063195	122078413	-	15219	5587	0.380208	0.407016	0.364656	protein_coding
PTPRC	ENSG00000081237	5.81048	-2.72708	0.000118072	0.0104342	-1	1	198638457	198757476	+	119020	9133	0.342483	0.366473	0.340489	protein_coding
SAMSN1	ENSG00000155307	4.17147	-2.69995	9.64243e-05	0.00925482	-1	21	14485228	14658821	-	173594	5164	0.363321	0.376452	0.362918	protein_coding
CHST1	ENSG00000175264	2.15821	-2.65295	0.000594624	0.0293459	-1	11	45647689	45665622	-	17934	4662	0.564434	0.592664	0.554517	protein_coding
LINGO2	ENSG00000174482	1.24135	-2.6137	0.0001622	0.0128457	-1	9	27948078	28670286	-	722209	3472	0.362092	0.449021	0.361672	protein_coding
TLR2	ENSG00000137462	4.53085	-2.61342	0.000104566	0.00947175	-1	4	153684070	153706260	+	22191	5771	0.388283	0.4131	0.37956	protein_coding
F2RL1	ENSG00000164251	2.7499	-2.60401	3.02706e-06	0.000933431	-1	5	76818933	76835315	+	16383	2927	0.446893	0.449607	0.446302	protein_coding
C5AR1	ENSG00000197405	4.8458	-2.55054	0.000101504	0.00934205	-1	19	47290023	47322066	+	32044	2956	0.496926	0.519959	0.494585	protein_coding
MYRF	ENSG00000124920	2.45116	-2.53617	0.000518875	0.0268574	-1	11	61752636	61788518	+	35883	10749	0.599353	0.595776	0.600883	protein_coding
FGF7	ENSG00000140285	5.81827	-2.53363	2.13744e-06	0.000774449	-1	15	49423237	49488775	+	65539	6511	0.338323	0.326985	0.339573	protein_coding
CAPG	ENSG00000042493	4.67636	-2.52542	0.000693614	0.0321168	-1	2	85394753	85418432	-	23680	2404	0.513197	0.600666	0.503314	protein_coding
CCL2	ENSG00000108691	5.63639	-2.51015	0.000303791	0.0198326	-1	17	34255218	34257203	+	1986	1985	0.459446	0.459446	0	protein_coding
RTN1	ENSG00000139970	3.21431	-2.51003	0.000130172	0.0109815	-1	14	59595976	59870776	-	274801	6009	0.391783	0.501581	0.389329	protein_coding
FCGR3A	ENSG00000203747	7.04625	-2.46943	0.00026999	0.0183083	-1	1	161541759	161550737	-	8979	2717	0.447427	0.464115	0.440185	protein_coding
RHPN1	ENSG00000158106	3.77158	-2.46371	1.67567e-05	0.00302404	-1	8	143368876	143384221	+	15346	4171	0.649788	0.669384	0.642474	protein_coding
ITGB2	ENSG00000160255	7.37543	-2.46117	2.0984e-05	0.0032403	-1	21	44885953	44931989	-	46037	6847	0.574507	0.605813	0.569037	protein_coding
PLAUR	ENSG00000011422	4.91925	-2.45638	0.000430003	0.0241551	-1	19	43646095	43670547	-	24453	4447	0.499427	0.526647	0.493377	protein_coding
EGR1	ENSG00000120738	8.98656	-2.45138	0.000506782	0.026546	-1	5	138465479	138469303	+	3825	3135	0.565115	0.55311	0.619739	protein_coding
CTSS	ENSG00000163131	6.6756	-2.43365	0.00019105	0.0144968	-1	1	150730079	150765957	-	35879	6878	0.393695	0.404623	0.391103	protein_coding
SPP1	ENSG00000118785	10.7286	-2.37552	3.83171e-06	0.00108888	-1	4	87975667	87983532	+	7866	7247	0.361221	0.365807	0.307443	protein_coding
CD86	ENSG00000114013	3.92665	-2.36972	0.000773264	0.034345	-1	3	122055362	122121139	+	65778	3429	0.407696	0.447069	0.40553	protein_coding
DAPK2	ENSG00000035664	2.41419	-2.35651	3.00832e-05	0.00415234	-1	15	63907036	64072033	-	164998	13592	0.468899	0.503973	0.465751	protein_coding
GAS1	ENSG00000180447	5.80351	-2.32625	7.33008e-06	0.00177058	-1	9	86944362	86947506	-	3145	3144	0.59701	0.59701	0	protein_coding
SMAD1	ENSG00000170365	5.42781	-2.31738	0.00035625	0.0218132	-1	4	145481194	145559176	+	77983	7080	0.38355	0.427542	0.379157	protein_coding
ALOX5AP	ENSG00000132965	3.86032	-2.31093	0.000167352	0.0130399	-1	13	30713478	30764426	+	50949	1673	0.456603	0.494322	0.455322	protein_coding
RGS16	ENSG00000143333	4.90008	-2.30071	2.9498e-06	0.00092938	-1	1	182598623	182604389	-	5767	2403	0.507978	0.531835	0.490931	protein_coding
IFITM10	ENSG00000244242	1.82882	-2.30009	0.00121145	0.0450192	-1	11	1732406	1750595	-	18190	4789	0.551872	0.632491	0.52306	protein_coding
NECAB1	ENSG00000123119	1.79617	-2.28792	0.000638689	0.0303458	-1	8	90791741	90959393	+	167653	6187	0.370082	0.340553	0.371214	protein_coding
CYBB	ENSG00000165168	7.77999	-2.28445	1.29668e-06	0.000552727	-1	X	37780059	37813461	+	33403	4361	0.373301	0.408851	0.367963	protein_coding
TFEC	ENSG00000105967	3.67739	-2.2756	0.000341988	0.0212722	-1	7	115935148	116159896	-	224749	8629	0.349974	0.331788	0.3507	protein_coding
ACSL1	ENSG00000151726	5.83542	-2.27105	0.00110528	0.0430861	-1	4	184755595	184826818	-	71224	6107	0.447131	0.457999	0.446112	protein_coding
DOCK2	ENSG00000134516	5.4095	-2.26712	2.91913e-05	0.00406798	-1	5	169637268	170083382	+	446115	13131	0.433878	0.492346	0.432105	protein_coding
ABI3BP	ENSG00000154175	6.14755	-2.24368	0.000390683	0.0230317	-1	3	100749156	100993515	-	244360	10909	0.37023	0.402878	0.368704	protein_coding
PRKCB	ENSG00000166501	3.59505	-2.23742	0.000914507	0.0381515	-1	16	23835983	24220611	+	384629	11027	0.437667	0.457876	0.437071	protein_coding
VTN	ENSG00000109072	4.47995	-2.23343	0.000310285	0.020043	-1	17	28367284	28373091	-	5808	1896	0.596521	0.590717	0.599335	protein_coding
FYB1	ENSG00000082074	6.40225	-2.21515	0.000524874	0.0269751	-1	5	39105252	39274528	-	169277	8799	0.379646	0.373792	0.379967	protein_coding
PLEK	ENSG00000115956	6.20772	-2.20866	0.000100565	0.00934205	-1	2	68365282	68397453	+	32172	3196	0.411737	0.464643	0.405902	protein_coding
CACNA2D4	ENSG00000151062	3.02195	-2.20777	0.000607735	0.0296562	-1	12	1791963	1918666	-	126704	7425	0.50455	0.553939	0.501476	protein_coding
TIMP1	ENSG00000102265	7.54976	-2.20728	0.0010222	0.0411522	-1	X	47582408	47586789	+	4382	1440	0.534809	0.585417	0.510031	protein_coding
FOS	ENSG00000170345	10.8968	-2.15096	8.05963e-05	0.00828428	-1	14	75278826	75282230	+	3405	3183	0.540247	0.535344	0.61086	protein_coding
TREM2	ENSG00000095970	2.91598	-2.14386	0.0011104	0.0431447	-1	6	41158506	41163186	-	4681	1090	0.542308	0.573394	0.532869	protein_coding
LRRC25	ENSG00000175489	3.83127	-2.14245	0.00137257	0.0492391	-1	19	18391137	18397622	-	6486	2425	0.548034	0.598351	0.51798	protein_coding
IRF8	ENSG00000140968	4.64459	-2.14148	0.000384888	0.0230317	-1	16	85899162	85922606	+	23445	4789	0.496758	0.498643	0.496274	protein_coding
SCPEP1	ENSG00000121064	4.77381	-2.13283	0.00120047	0.0447916	-1	17	56978129	57006768	+	28640	3817	0.452809	0.450878	0.453106	protein_coding
UCP2	ENSG00000175567	5.80095	-2.11954	1.98658e-05	0.00319874	-1	11	73974672	73982843	-	8172	2757	0.523681	0.550598	0.509974	protein_coding
DAPP1	ENSG00000070190	3.55716	-2.11517	0.000976133	0.0400768	-1	4	99816827	99870190	+	53364	4580	0.386954	0.376856	0.387902	protein_coding
VNN1	ENSG00000112299	2.54281	-2.11104	0.00131867	0.0481349	-1	6	132680849	132714055	-	33207	3846	0.381136	0.394176	0.379428	protein_coding
LCP1	ENSG00000136167	7.40498	-2.09852	0.000326928	0.0204232	-1	13	46125920	46211871	-	85952	5051	0.402124	0.451	0.399073	protein_coding
CD163	ENSG00000177575	8.75586	-2.06638	0.000130035	0.0109815	-1	12	7470811	7503893	-	33083	5797	0.374252	0.440573	0.360161	protein_coding
CD180	ENSG00000134061	3.57019	-2.05181	8.54672e-06	0.00202233	-1	5	67179613	67196799	-	17187	5665	0.429652	0.438835	0.425137	protein_coding
PSTPIP1	ENSG00000140368	3.2142	-2.04777	0.00140453	0.0496519	-1	15	76993359	77037475	+	44117	4551	0.565033	0.618985	0.558827	protein_coding
CD53	ENSG00000143119	5.82102	-2.01409	0.00029536	0.0194575	-1	1	110871188	110899922	+	28735	2142	0.395246	0.441176	0.391546	protein_coding
FREM1	ENSG00000164946	4.01385	-2.01376	0.000234982	0.0167763	-1	9	14737152	14910995	-	173844	8233	0.394304	0.467752	0.390653	protein_coding
IKZF1	ENSG00000185811	4.0798	-2.00971	0.00142515	0.0498905	-1	7	50304068	50405101	+	101034	10908	0.434511	0.466905	0.430591	protein_coding
PGM2L1	ENSG00000165434	2.64796	-1.99055	8.657e-06	0.00202233	-1	11	74330316	74398433	-	68118	8768	0.374503	0.38766	0.372559	protein_coding
SH3TC1	ENSG00000125089	5.71248	-1.987	3.14998e-13	1.52175e-09	-1	4	8182072	8241803	+	59732	10577	0.574844	0.622483	0.564593	protein_coding
TLR1	ENSG00000174125	3.64636	-1.98228	0.000808027	0.0352733	-1	4	38790677	38856817	-	66141	4529	0.407817	0.390594	0.409083	protein_coding
CD300A	ENSG00000167851	4.09749	-1.97746	0.000369542	0.0224091	-1	17	74466399	74484794	+	18396	2693	0.520413	0.552544	0.514903	protein_coding
MLF1	ENSG00000178053	1.44842	-1.97407	0.000916968	0.0381515	-1	3	158571163	158607252	+	36090	3721	0.375073	0.379199	0.374598	protein_coding
PTPRO	ENSG00000151490	3.33787	-1.97057	0.000132347	0.0110873	-1	12	15322257	15602175	+	279919	20223	0.37591	0.405034	0.373642	protein_coding
IQCG	ENSG00000114473	3.0464	-1.95414	0.000579098	0.0289409	-1	3	197889077	197960142	-	71066	7449	0.439175	0.45778	0.436997	protein_coding
HIVEP3	ENSG00000127124	3.81945	-1.93799	0.00140806	0.0496519	-1	1	41506365	42035925	-	529561	14609	0.464472	0.552947	0.461962	protein_coding
TIPARP	ENSG00000163659	4.39925	-1.92189	9.9475e-05	0.00934205	-1	3	156673235	156706770	+	33536	4789	0.382734	0.449781	0.371565	protein_coding
ITGAM	ENSG00000169896	5.62551	-1.91374	3.04468e-05	0.00416288	-1	16	31259967	31332892	+	72926	5658	0.433624	0.548427	0.423967	protein_coding
CD84	ENSG00000066294	5.14536	-1.91192	0.000468937	0.0252628	-1	1	160541095	160579516	-	38422	9247	0.415996	0.436141	0.409611	protein_coding
BTK	ENSG00000010671	3.87137	-1.90513	0.000836028	0.0359542	-1	X	101349447	101390796	-	41350	4554	0.431788	0.453008	0.429162	protein_coding
HDAC9	ENSG00000048052	4.12526	-1.87202	0.00029432	0.0194575	-1	7	18086949	19002416	+	915468	17224	0.361268	0.39712	0.360581	protein_coding
IGSF6	ENSG00000140749	4.79221	-1.84819	0.000996538	0.0405697	-1	16	21639550	21652608	-	13059	3461	0.407107	0.418954	0.402834	protein_coding
KLF4	ENSG00000136826	8.5658	-1.84004	2.00846e-05	0.00319874	-1	9	107484852	107490482	-	5631	3657	0.569449	0.583538	0.543335	protein_coding
ZFP36	ENSG00000128016	8.30094	-1.83328	0.000413733	0.0237005	-1	19	39406847	39409412	+	2566	1973	0.591033	0.582362	0.619932	protein_coding
PIWIL4	ENSG00000134627	2.46339	-1.83144	3.70951e-05	0.00467495	-1	11	94543840	94621421	+	77582	4475	0.402483	0.463017	0.398777	protein_coding
ATP8B4	ENSG00000104043	4.89629	-1.82845	1.92482e-05	0.00317005	-1	15	49858238	50182817	-	324580	11022	0.38399	0.401198	0.383385	protein_coding
FAP	ENSG00000078098	5.09195	-1.82017	3.16795e-06	0.000937002	-1	2	162170684	162245151	-	74468	6937	0.367035	0.381145	0.365586	protein_coding
PAPLN	ENSG00000100767	5.18013	-1.78311	0.00110592	0.0430861	-1	14	73237497	73274640	+	37144	7671	0.552271	0.586625	0.543329	protein_coding
CORO1A	ENSG00000102879	5.98461	-1.74598	0.00041069	0.0237005	-1	16	30182827	30189076	+	6250	4771	0.644103	0.636764	0.667794	protein_coding
PTGS1	ENSG00000095303	3.44743	-1.66865	0.000293531	0.0194575	-1	9	122370530	122395703	+	25174	5771	0.500775	0.513949	0.496856	protein_coding
KLF6	ENSG00000067082	9.17047	-1.62461	2.40058e-05	0.00347915	-1	10	3775996	3785281	-	9286	6135	0.480883	0.473513	0.495238	protein_coding
NFKBIZ	ENSG00000144802	7.26429	-1.62039	0.000356705	0.0218132	-1	3	101827991	101861022	+	33032	5888	0.402319	0.46892	0.387872	protein_coding
SLC9A9	ENSG00000181804	5.2264	-1.60175	1.08124e-05	0.00224865	-1	3	143265222	143848485	-	583264	4023	0.392749	0.44171	0.392409	protein_coding
PIK3AP1	ENSG00000155629	5.91456	-1.57681	0.000551089	0.027829	-1	10	96593315	96720514	-	127200	5667	0.443581	0.470266	0.442336	protein_coding
SHTN1	ENSG00000187164	5.24556	-1.57157	3.16672e-06	0.000937002	-1	10	116881477	117126586	-	245110	8231	0.390908	0.411372	0.390197	protein_coding
RELT	ENSG00000054967	4.76108	-1.55182	0.0010217	0.0411522	-1	11	73376399	73397474	+	21076	6177	0.597248	0.608872	0.592429	protein_coding
VCAM1	ENSG00000162692	6.65978	-1.55067	0.00118351	0.0445313	-1	1	100719742	100739045	+	19304	6040	0.369269	0.384106	0.362512	protein_coding
VAV1	ENSG00000141968	5.10995	-1.54759	0.00101414	0.0411522	-1	19	6772708	6857366	+	84659	4283	0.473942	0.553817	0.469686	protein_coding
GLIPR1	ENSG00000139278	5.07862	-1.52368	0.000831662	0.0358728	-1	12	75480753	75503863	+	23111	6203	0.377196	0.360148	0.383451	protein_coding
NEFH	ENSG00000100285	2.29087	-1.52331	0.000827969	0.0358202	-1	22	29480218	29491390	+	11173	3791	0.528375	0.578475	0.502642	protein_coding
RAB29	ENSG00000117280	4.28759	-1.52051	1.11711e-05	0.00224865	-1	1	205767986	205775482	-	7497	3899	0.460112	0.470121	0.449263	protein_coding
PCK2	ENSG00000100889	3.62764	-1.48746	0.000604688	0.0296072	-1	14	24094053	24110598	+	16546	4166	0.491931	0.570331	0.465546	protein_coding
SDK1	ENSG00000146555	4.25969	-1.48044	2.06621e-05	0.0032403	-1	7	3301252	4269000	+	967749	12209	0.431228	0.571464	0.429436	protein_coding
BCL2L11	ENSG00000153094	5.03975	-1.47966	5.15154e-08	4.39184e-05	-1	2	111119378	111168445	+	49068	6642	0.444189	0.468684	0.440354	protein_coding
SKAP2	ENSG00000005020	4.75746	-1.46429	0.000643171	0.0303631	-1	7	26667068	26995239	-	328172	5339	0.369365	0.391646	0.368997	protein_coding
SYK	ENSG00000165025	5.89158	-1.45878	0.00109321	0.043007	-1	9	90801787	90898549	+	96763	5194	0.441692	0.504428	0.438133	protein_coding
C11orf45	ENSG00000174370	2.45656	-1.45612	0.00136753	0.0492044	-1	11	128899565	128906035	-	6471	3745	0.521484	0.509212	0.538349	protein_coding
BMP2K	ENSG00000138756	5.57681	-1.4517	7.84251e-05	0.00819877	-1	4	78776342	78916365	+	140024	9914	0.356827	0.381582	0.354941	protein_coding
TEC	ENSG00000135605	2.49404	-1.44475	0.000402263	0.0233237	-1	4	48135783	48269838	-	134056	3985	0.404327	0.429611	0.403552	protein_coding
LPCAT2	ENSG00000087253	5.10339	-1.43829	0.000477575	0.0254467	-1	16	55509072	55586666	+	77595	7345	0.354911	0.352212	0.355194	protein_coding
SOX4	ENSG00000124766	6.18446	-1.4222	0.00128238	0.0471714	-1	6	21593751	21598619	+	4869	4868	0.525062	0.525062	0	protein_coding
FRRS1	ENSG00000156869	4.86383	-1.40951	3.11106e-05	0.00421389	-1	1	99703970	99766635	-	62666	8605	0.382031	0.402789	0.378727	protein_coding
PMAIP1	ENSG00000141682	5.55703	-1.39452	5.19352e-05	0.00597378	-1	18	59899996	59904305	+	4310	2183	0.396148	0.400366	0.391816	protein_coding
SPECC1	ENSG00000128487	4.32496	-1.37586	1.22607e-05	0.00240127	-1	17	20008865	20319026	+	310162	21220	0.425315	0.459378	0.422813	protein_coding
GASK1B	ENSG00000164125	5.92784	-1.37018	0.000460561	0.0250937	-1	4	158124474	158173318	-	48845	7872	0.3711	0.398882	0.365762	protein_coding
GNG2	ENSG00000186469	5.09751	-1.36961	0.000533707	0.027236	-1	14	51826195	51979342	+	153148	6364	0.402306	0.423633	0.401382	protein_coding
RGL1	ENSG00000143344	6.10229	-1.36455	9.1242e-06	0.00202233	-1	1	183636085	183928532	+	292448	5286	0.399799	0.474839	0.398418	protein_coding
RAB3IL1	ENSG00000167994	5.584	-1.3093	8.74015e-05	0.00873593	-1	11	61897301	61920269	-	22969	3178	0.592912	0.641913	0.585043	protein_coding
KCNE3	ENSG00000175538	4.31782	-1.30653	0.00118262	0.0445313	-1	11	74454841	74467729	-	12889	3593	0.484094	0.48678	0.483055	protein_coding
CNTLN	ENSG00000044459	3.89334	-1.29413	0.0011553	0.0443311	-1	9	17134982	17503923	+	368942	11036	0.364259	0.369065	0.364111	protein_coding
CYRIB	ENSG00000153310	6.00525	-1.26946	0.000567061	0.0284374	-1	8	129839593	130017129	-	177537	9111	0.420444	0.419822	0.420478	protein_coding
PGPEP1	ENSG00000130517	5.14294	-1.2336	4.92148e-05	0.00579894	-1	19	18340598	18369950	+	29353	7502	0.513117	0.531458	0.506819	protein_coding
BCAT1	ENSG00000060982	6.01761	-1.22689	6.13977e-06	0.00156112	-1	12	24810024	24949101	-	139078	11399	0.400059	0.383367	0.401549	protein_coding
CD28	ENSG00000178562	5.01558	-1.21842	0.000116658	0.0103725	-1	2	203706475	203738912	+	32438	4881	0.400037	0.426142	0.395413	protein_coding
NEDD8	ENSG00000129559	2.43321	-1.21007	0.000474751	0.0253896	-1	14	24216857	24232367	-	15511	3781	0.435074	0.431367	0.436269	protein_coding
ZC3H12C	ENSG00000149289	3.66323	-1.18576	0.00116234	0.0443311	-1	11	110093392	110171841	+	78450	9681	0.372306	0.369073	0.372761	protein_coding
CITED2	ENSG00000164442	7.45861	-1.14324	0.00109498	0.043007	-1	6	139371807	139374648	-	2842	2559	0.504752	0.489254	0.64539	protein_coding
CKAP2	ENSG00000136108	4.93208	-1.14053	0.000178843	0.0137141	-1	13	52455429	52476628	+	21200	4537	0.388603	0.364338	0.395211	protein_coding
PGD	ENSG00000142657	6.82465	-1.13901	0.000527876	0.0270336	-1	1	10398592	10420511	+	21920	3319	0.475387	0.52787	0.466022	protein_coding
AMIGO2	ENSG00000139211	4.38978	-1.13581	0.0012961	0.0475553	-1	12	47075707	47079959	-	4253	3961	0.446613	0.449634	0.405498	protein_coding
PHGDH	ENSG00000092621	4.62568	-1.11712	0.000707292	0.0325422	-1	1	119648411	119744218	+	95808	9163	0.437839	0.517734	0.429389	protein_coding
RASGEF1B	ENSG00000138670	5.18021	-1.08936	0.000468521	0.0252628	-1	4	81426393	82044244	-	617852	10160	0.390494	0.41378	0.390105	protein_coding
ADAM9	ENSG00000168615	7.4061	-1.0868	1.71097e-05	0.00302404	-1	8	38996754	39105445	+	108692	17680	0.375017	0.363857	0.377185	protein_coding
SLC1A3	ENSG00000079215	6.1501	-1.08574	2.15084e-05	0.0032471	-1	5	36596588	36688334	+	91747	21209	0.40392	0.415814	0.400343	protein_coding
CREG1	ENSG00000143162	7.24908	-1.08502	6.89844e-06	0.00169456	-1	1	167529117	167553805	-	24689	3280	0.444953	0.457012	0.443105	protein_coding
PLBD1	ENSG00000121316	5.39331	-1.08269	0.000593809	0.0293459	-1	12	14503661	14567883	-	64223	2363	0.40564	0.469742	0.403191	protein_coding
MAP3K8	ENSG00000107968	6.4728	-1.08016	8.90395e-05	0.00877857	-1	10	30434021	30461833	+	27813	3507	0.426183	0.45566	0.42193	protein_coding
TLCD2	ENSG00000185561	4.16002	-1.07372	5.03643e-05	0.00588654	-1	17	1702816	1710377	-	7562	5880	0.518185	0.49881	0.585961	protein_coding
DCN	ENSG00000011465	10.5566	-1.07164	0.00123977	0.0458367	-1	12	91140484	91183217	-	42734	12926	0.348981	0.366703	0.341296	protein_coding
CCDC125	ENSG00000183323	5.11699	-1.06316	0.0013682	0.0492044	-1	5	69280175	69332809	-	52635	7967	0.437588	0.427011	0.439474	protein_coding
ME2	ENSG00000082212	5.55321	-1.06206	0.000122683	0.010776	-1	18	50879080	50954257	+	75178	15881	0.385796	0.375354	0.388593	protein_coding
FOXRED2	ENSG00000100350	4.68324	-1.04933	1.69333e-05	0.00302404	-1	22	36487190	36507043	-	19854	5510	0.526318	0.550817	0.516907	protein_coding
PTGES	ENSG00000148344	6.02797	-1.03741	3.65002e-05	0.00467495	-1	9	129738331	129753042	-	14712	1887	0.522602	0.568098	0.515908	protein_coding
LIPA	ENSG00000107798	6.64464	-1.03173	9.6124e-05	0.00925482	-1	10	89213569	89414557	-	200989	4872	0.414293	0.42303	0.414076	protein_coding
IL6ST	ENSG00000134352	9.51356	-1.02751	0.000846089	0.0362792	-1	5	55935095	55995022	-	59928	10098	0.374372	0.363933	0.376488	protein_coding
NRIP1	ENSG00000180530	5.73018	-1.00627	0.000126682	0.0109157	-1	21	14961235	15065936	-	104702	8489	0.365928	0.394864	0.363375	protein_coding
GPR137B	ENSG00000077585	4.69014	-0.989345	0.00133623	0.0482943	-1	1	236142505	236221865	+	79361	2299	0.436278	0.46107	0.435538	protein_coding
CTHRC1	ENSG00000164932	6.04985	-0.985502	0.000427491	0.0241551	-1	8	103371538	103382989	+	11452	1739	0.398655	0.434158	0.392298	protein_coding
DMD	ENSG00000198947	5.45089	-0.981808	0.000101845	0.00934205	-1	X	31097677	33339609	-	2241933	54936	0.364202	0.377658	0.363864	protein_coding
P3H2	ENSG00000090530	4.96166	-0.970143	0.0004213	0.0239447	-1	3	189956728	190122437	-	165710	5555	0.381832	0.473447	0.378654	protein_coding
PCOLCE2	ENSG00000163710	6.41792	-0.936571	0.000658632	0.0308918	-1	3	142815922	142889206	-	73285	3518	0.409243	0.457931	0.406788	protein_coding
ITPR2	ENSG00000123104	6.22604	-0.933948	0.000324124	0.0203356	-1	12	26335352	26833194	-	497843	13849	0.382601	0.411726	0.381768	protein_coding
GLA	ENSG00000102393	5.00102	-0.930509	0.00142289	0.0498905	-1	X	101393273	101408012	-	14740	6190	0.42798	0.437318	0.421219	protein_coding
GNPTAB	ENSG00000111670	5.65673	-0.911419	0.000636892	0.0303458	-1	12	101745499	101830959	-	85461	9750	0.409537	0.415897	0.408717	protein_coding
DHTKD1	ENSG00000181192	5.20843	-0.909927	0.00130409	0.0477277	-1	10	12068954	12123221	+	54268	5278	0.462159	0.481243	0.460103	protein_coding
DEF6	ENSG00000023892	5.57553	-0.900006	0.00132518	0.0481349	-1	6	35297818	35321771	+	23954	2568	0.484991	0.60514	0.470563	protein_coding
FAXDC2	ENSG00000170271	4.79451	-0.876973	0.000748875	0.033602	-1	5	154818492	154859252	-	40761	6916	0.471516	0.502892	0.465105	protein_coding
EHD4	ENSG00000103966	5.8343	-0.875028	0.000204469	0.0151192	-1	15	41895933	41972557	-	76625	7858	0.470988	0.52227	0.465128	protein_coding
ISY1	ENSG00000240682	3.70741	-0.868506	0.00037137	0.0224261	-1	3	129127415	129161063	-	33649	3859	0.451825	0.545219	0.439726	protein_coding
SESTD1	ENSG00000187231	4.99761	-0.865337	0.000600688	0.0295111	-1	2	179101678	179264832	-	163155	11384	0.369087	0.383169	0.368031	protein_coding
SMPDL3A	ENSG00000172594	5.64021	-0.864455	0.000672641	0.0312783	-1	6	122789049	122809720	+	20672	2341	0.404673	0.39513	0.405892	protein_coding
TOP1MT	ENSG00000184428	4.08244	-0.864196	0.00089792	0.0378164	-1	8	143304384	143359979	-	55596	6398	0.543034	0.578149	0.538468	protein_coding
GAS2L3	ENSG00000139354	4.16546	-0.85751	0.00051605	0.0268069	-1	12	100573683	100628288	+	54606	7410	0.366047	0.383941	0.363238	protein_coding
EFL1	ENSG00000140598	4.46536	-0.854531	0.000611262	0.0297283	-1	15	82130233	82262734	-	132502	4684	0.380374	0.448335	0.377884	protein_coding
GPRC5B	ENSG00000167191	6.01528	-0.848733	0.000165333	0.0130227	-1	16	19856691	19886167	-	29477	6645	0.510822	0.520843	0.507906	protein_coding
BACH1	ENSG00000156273	6.48276	-0.828763	0.000142802	0.0118265	-1	21	29194071	29630751	+	436681	7648	0.396059	0.398666	0.396012	protein_coding
PTBP3	ENSG00000119314	6.37051	-0.823859	4.29644e-05	0.00523264	-1	9	112217716	112333664	-	115949	8220	0.376962	0.374574	0.377144	protein_coding
SLC11A2	ENSG00000110911	6.20683	-0.786484	0.000673349	0.0312783	-1	12	50979401	51028566	-	49166	9864	0.435452	0.442417	0.433704	protein_coding
DEK	ENSG00000124795	7.25393	-0.774081	3.27079e-05	0.00438922	-1	6	18223860	18264548	-	40689	7238	0.391467	0.378834	0.3942	protein_coding
OGFRL1	ENSG00000119900	6.02734	-0.761677	1.73638e-05	0.00303197	-1	6	71288811	71309059	+	20249	9167	0.361517	0.357805	0.364588	protein_coding
ABI1	ENSG00000136754	6.20873	-0.739893	5.11867e-05	0.00593479	-1	10	26746593	26861087	-	114495	4205	0.384387	0.377646	0.384644	protein_coding
WASHC4	ENSG00000136051	6.33493	-0.732625	0.000538351	0.0273766	-1	12	105107324	105169130	+	61807	7659	0.352684	0.351482	0.352854	protein_coding
ASPH	ENSG00000198363	6.92404	-0.713454	0.00118327	0.0445313	-1	8	61500556	61714640	-	214085	20010	0.381687	0.377111	0.382158	protein_coding
QSER1	ENSG00000060749	4.66487	-0.697531	0.00101839	0.0411522	-1	11	32892811	32993316	+	100506	10892	0.386876	0.395795	0.385792	protein_coding
GALNT1	ENSG00000141429	6.8822	-0.675763	0.000921343	0.0381515	-1	18	35581117	35711834	+	130718	5111	0.384946	0.379182	0.385181	protein_coding
CMTM6	ENSG00000091317	6.71981	-0.675051	0.000368173	0.0224091	-1	3	32481312	32502852	-	21541	3853	0.385237	0.374254	0.387629	protein_coding
ZFAND5	ENSG00000107372	8.14709	-0.631841	5.37061e-05	0.0059924	-1	9	72351413	72365235	-	13823	7057	0.398929	0.437721	0.358463	protein_coding
ERICH1	ENSG00000104714	5.94165	-0.622341	0.000234554	0.0167763	-1	8	614746	738106	-	123361	9696	0.511657	0.512479	0.511587	protein_coding
CYP20A1	ENSG00000119004	5.60912	-0.619197	0.00111923	0.0432714	-1	2	203238977	203306026	+	67050	10606	0.422721	0.429002	0.42154	protein_coding
MYO18A	ENSG00000196535	6.46513	-0.607642	5.39976e-05	0.0059924	-1	17	29071122	29180398	-	109277	14983	0.537337	0.580258	0.530517	protein_coding
ARHGAP12	ENSG00000165322	5.72667	-0.590705	1.10635e-05	0.00224865	-1	10	31805398	31928876	-	123479	5923	0.369369	0.377174	0.368976	protein_coding
APLP2	ENSG00000084234	9.95392	-0.558835	0.000595301	0.0293459	-1	11	130068147	130144811	+	76665	7439	0.439724	0.477618	0.435652	protein_coding
HELZ	ENSG00000198265	6.06352	-0.554946	0.000640711	0.0303458	-1	17	67070444	67245989	-	175546	15644	0.381669	0.399962	0.379879	protein_coding
GMFB	ENSG00000197045	5.68655	-0.549202	0.000380063	0.0228558	-1	14	54474484	54489026	-	14543	7788	0.366249	0.350411	0.384513	protein_coding
NFX1	ENSG00000086102	5.68789	-0.531407	0.000522523	0.0269499	-1	9	33290512	33371157	+	80646	7121	0.425693	0.468052	0.42159	protein_coding
TAB2	ENSG00000055208	6.28885	-0.485348	0.00120223	0.0447916	-1	6	149218641	149411613	+	192973	5907	0.388746	0.429829	0.387448	protein_coding
TAF1D	ENSG00000166012	6.0242	-0.469081	0.000820338	0.0356501	-1	11	93729948	93784391	-	54444	7963	0.417942	0.363305	0.427302	protein_coding
RTN3	ENSG00000133318	6.60776	-0.443204	0.000459302	0.0250937	-1	11	63681446	63759891	+	78446	5781	0.4212	0.417921	0.42146	protein_coding
MSL1	ENSG00000188895	7.05579	0.456728	0.000748615	0.033602	1	17	40121971	40136917	+	14947	7716	0.460792	0.482633	0.437483	protein_coding
KIAA0100	ENSG00000007202	7.36943	0.463665	0.00111963	0.0432714	1	17	28614446	28645454	-	31009	9196	0.467557	0.505763	0.451449	protein_coding
REPIN1	ENSG00000214022	6.00792	0.471953	0.00107882	0.0427195	1	7	150368189	150374044	+	5856	4644	0.622886	0.61714	0.644922	protein_coding
LEMD2	ENSG00000161904	6.51283	0.496444	0.000757263	0.0338735	1	6	33771202	33789130	-	17929	6774	0.531627	0.558754	0.515152	protein_coding
MAP3K11	ENSG00000173327	7.00173	0.507386	0.000897095	0.0378164	1	11	65597756	65615382	-	17627	10555	0.571315	0.597347	0.532457	protein_coding
KCTD10	ENSG00000110906	6.07171	0.516118	0.000418912	0.0239027	1	12	109448655	109477359	-	28705	9675	0.475927	0.476176	0.4758	protein_coding
OAZ2	ENSG00000180304	6.5682	0.532026	0.000467713	0.0252628	1	15	64687573	64703281	-	15709	7665	0.478228	0.491585	0.465498	protein_coding
RAB1B	ENSG00000174903	7.19208	0.568048	0.000242717	0.0171595	1	11	66268590	66277492	+	8903	1944	0.555156	0.608025	0.540385	protein_coding
FEZ2	ENSG00000171055	5.84951	0.602493	0.000311162	0.020043	1	2	36531805	36646087	-	114283	8921	0.405409	0.387961	0.406887	protein_coding
ERC1	ENSG00000082805	6.12119	0.606	0.000563265	0.0283451	1	12	990509	1495933	+	505425	13453	0.393505	0.48019	0.391135	protein_coding
ZNF316	ENSG00000205903	6.47349	0.610099	0.000459484	0.0250937	1	7	6637318	6658279	+	20962	7654	0.603263	0.625555	0.590441	protein_coding
ABHD17A	ENSG00000129968	7.15233	0.614631	5.41266e-05	0.0059924	1	19	1876810	1885496	-	8687	6157	0.650933	0.653727	0.644128	protein_coding
TMEM129	ENSG00000168936	5.26599	0.649619	0.000868793	0.036925	1	4	1715952	1721358	-	5407	3436	0.624676	0.627183	0.620305	protein_coding
BLCAP	ENSG00000166619	6.43216	0.668227	0.000402327	0.0233237	1	20	37492472	37527931	-	35460	7858	0.479794	0.487401	0.477628	protein_coding
TBCD	ENSG00000141556	7.07535	0.703017	5.50354e-05	0.00604263	1	17	82752042	82945914	+	193873	23021	0.528472	0.547934	0.52585	protein_coding
SORBS3	ENSG00000120896	7.40938	0.713497	0.00078044	0.0344845	1	8	22544986	22575788	+	30803	5842	0.558405	0.642075	0.538822	protein_coding
PPP1R12C	ENSG00000125503	7.03439	0.757852	0.000197603	0.0148386	1	19	55090914	55117637	-	26724	7784	0.576844	0.635534	0.552722	protein_coding
AGRN	ENSG00000188157	6.08715	0.762938	0.000739105	0.0333703	1	1	1020120	1056118	+	35999	10723	0.657092	0.657745	0.656815	protein_coding
TMEM150A	ENSG00000168890	4.86312	0.785655	0.000498239	0.0263539	1	2	85598547	85603196	-	4650	3086	0.601635	0.601102	0.602687	protein_coding
ZNF580	ENSG00000213015	3.80417	0.794738	0.00118308	0.0445313	1	19	55635016	55643470	+	8455	2601	0.574403	0.622068	0.553221	protein_coding
HEG1	ENSG00000173706	6.39487	0.83799	0.000195519	0.0147586	1	3	124965710	125055997	-	90288	9944	0.449943	0.491553	0.444793	protein_coding
TRPM4	ENSG00000130529	5.23779	0.862192	7.17377e-05	0.00758901	1	19	49157741	49211836	+	54096	6581	0.503004	0.603252	0.489119	protein_coding
DOLK	ENSG00000175283	3.94319	0.863368	0.00140615	0.0496519	1	9	128945530	128947603	-	2074	2073	0.567294	0.567294	0	protein_coding
TRIM5	ENSG00000132256	3.85596	0.877923	2.32726e-05	0.00340696	1	11	5663195	5938619	-	275425	5336	0.375929	0.427099	0.374919	protein_coding
EML1	ENSG00000066629	5.21583	0.878185	0.000917237	0.0381515	1	14	99737693	99942060	+	204368	8898	0.451912	0.478647	0.450696	protein_coding
ADCY6	ENSG00000174233	6.60862	0.886453	0.000723057	0.0328504	1	12	48766194	48789089	-	22896	8444	0.54418	0.568806	0.52979	protein_coding
STARD8	ENSG00000130052	5.24846	0.89025	0.0011309	0.0435907	1	X	68647666	68725842	+	78177	5541	0.50275	0.569572	0.497653	protein_coding
ANXA6	ENSG00000197043	7.86168	0.911682	0.000702732	0.0324353	1	5	151100706	151157785	-	57080	5449	0.48969	0.520095	0.486481	protein_coding
LAMC3	ENSG00000050555	8.52193	0.935687	0.000398962	0.0233151	1	9	131009174	131094473	+	85300	8909	0.53656	0.611292	0.527844	protein_coding
SPTAN1	ENSG00000197694	8.74638	0.938175	4.97755e-10	8.01551e-07	1	9	128552558	128633662	+	81105	16243	0.468189	0.522995	0.454464	protein_coding
AOPEP	ENSG00000148120	6.06068	0.983191	0.00132507	0.0481349	1	9	94726699	95087159	+	360461	10655	0.428938	0.471516	0.427641	protein_coding
LINC00863	ENSG00000224914	2.82671	0.994398	0.00118541	0.0445313	1	10	87341685	87357882	+	16198	5667	0.417423	0.452268	0.39867	lncRNA
LGALSL	ENSG00000119862	3.90276	1.00758	0.00115962	0.0443311	1	2	64453969	64461381	+	7413	3927	0.448057	0.427553	0.471162	protein_coding
PPP1R12B	ENSG00000077157	6.54865	1.01082	2.50972e-05	0.00360132	1	1	202348699	202592706	+	244008	21035	0.396333	0.466508	0.389713	protein_coding
RASGRP2	ENSG00000068831	5.68937	1.01578	0.000216974	0.0157425	1	11	64726911	64745456	-	18546	6068	0.556322	0.627719	0.5216	protein_coding
SLC16A2	ENSG00000147100	4.7833	1.02109	0.000626989	0.0302898	1	X	74421493	74533917	+	112425	4285	0.435921	0.528588	0.432249	protein_coding
BLOC1S4	ENSG00000186222	3.68263	1.05865	0.000511266	0.0266539	1	4	6716174	6717664	+	1491	1490	0.526846	0.526846	0	protein_coding
AIF1L	ENSG00000126878	5.02037	1.07853	0.00020394	0.0151192	1	9	131096476	131123152	+	26677	5289	0.538199	0.561165	0.53252	protein_coding
BCAR1	ENSG00000050820	7.13147	1.07996	0.000773963	0.034345	1	16	75228181	75268053	-	39873	9179	0.596985	0.635472	0.585476	protein_coding
TPM2	ENSG00000198467	7.11968	1.09391	0.000355183	0.0218132	1	9	35681992	35690056	-	8065	3175	0.549107	0.581417	0.528124	protein_coding
ADAM15	ENSG00000143537	6.31991	1.10921	3.06086e-07	0.0001643	1	1	155050566	155062775	+	12210	6562	0.582439	0.622066	0.536391	protein_coding
MOCS1	ENSG00000124615	6.08285	1.12636	0.000443519	0.0246281	1	6	39899578	39934551	-	34974	5161	0.503217	0.538655	0.497082	protein_coding
EPB41L1	ENSG00000088367	5.07186	1.13135	6.69109e-07	0.000322219	1	20	36091504	36232799	+	141296	9640	0.499812	0.551141	0.496054	protein_coding
AP3M2	ENSG00000070718	4.52309	1.14294	0.000277648	0.018716	1	8	42152946	42171673	+	18728	6265	0.414001	0.46241	0.389665	protein_coding
SYTL2	ENSG00000137501	4.36211	1.18632	0.000152949	0.0123837	1	11	85694224	85811159	-	116936	11234	0.402223	0.420064	0.400327	protein_coding
CLTCL1	ENSG00000070371	2.90514	1.19924	0.00132895	0.0481511	1	22	19179473	19291719	-	112247	10019	0.464168	0.541371	0.456601	protein_coding
CCDC85B	ENSG00000175602	4.69071	1.22977	0.000255871	0.0178022	1	11	65890673	65891635	+	963	962	0.716216	0.716216	0	protein_coding
HACE1	ENSG00000085382	6.08127	1.23332	0.000980257	0.0401324	1	6	104728094	104859919	-	131826	9208	0.373897	0.376086	0.373733	protein_coding
PPM1L	ENSG00000163590	4.3433	1.24752	0.000130326	0.0109815	1	3	160755602	161078902	+	323301	12432	0.384436	0.410956	0.383375	protein_coding
RFTN1	ENSG00000131378	5.66644	1.24987	0.000151995	0.0123756	1	3	16313574	16514026	-	200453	4748	0.434987	0.534962	0.432561	protein_coding
NAT14	ENSG00000090971	3.48488	1.26177	5.6766e-05	0.00618579	1	19	55485188	55487568	+	2381	1977	0.657143	0.658068	0.652605	protein_coding
LIMS2	ENSG00000072163	5.42964	1.26378	9.96087e-06	0.00215467	1	2	127638381	127681786	-	43406	8717	0.563553	0.636572	0.545203	protein_coding
CLEC11A	ENSG00000105472	4.10542	1.2897	0.000626544	0.0302898	1	19	50723364	50725718	+	2355	1430	0.665251	0.67972	0.642857	protein_coding
SHC2	ENSG00000129946	5.31833	1.29366	0.000638166	0.0303458	1	19	416589	461033	-	44445	4147	0.587188	0.65686	0.580018	protein_coding
MRI1	ENSG00000037757	5.5287	1.30299	2.84099e-06	0.000915403	1	19	13764522	13774282	+	9761	3461	0.521926	0.542618	0.510557	protein_coding
NKD1	ENSG00000140807	4.64278	1.32523	0.000900204	0.0378164	1	16	50548396	50649249	+	100854	17348	0.516633	0.516601	0.51664	protein_coding
FAT1	ENSG00000083857	5.6289	1.34875	0.000390934	0.0230317	1	4	186587794	186726722	-	138929	16135	0.415265	0.46396	0.408867	protein_coding
NOTCH3	ENSG00000074181	8.36262	1.3561	0.000321608	0.0202655	1	19	15159038	15200995	-	41958	9375	0.548776	0.623147	0.527377	protein_coding
LINC00472	ENSG00000233237	4.62163	1.36227	2.77454e-06	0.000915403	1	6	71343427	71420745	-	77319	19864	0.371324	0.374043	0.370383	lncRNA
JAG1	ENSG00000101384	7.31247	1.36258	8.37473e-05	0.00842881	1	20	10637684	10673999	-	36316	9274	0.474515	0.489648	0.469324	protein_coding
HYAL2	ENSG00000068001	5.19091	1.36347	0.000950841	0.0391492	1	3	50317790	50322782	-	4993	4418	0.609976	0.62268	0.512195	protein_coding
MIR29B2CHG	ENSG00000203709	4.23087	1.37176	4.59819e-05	0.00546243	1	1	207801518	207879115	-	77598	16733	0.476591	0.494472	0.471675	lncRNA
KDM7A.DT	ENSG00000260231	2.80025	1.37226	0.00139249	0.0495857	1	7	140177184	140179640	+	2457	2456	0.504479	0.504479	0	lncRNA
LEPROTL1	ENSG00000104660	5.52663	1.37325	0.00106265	0.0425441	1	8	30095408	30177208	+	81801	5399	0.426088	0.426931	0.426028	protein_coding
TRIB2	ENSG00000071575	5.70244	1.37487	4.31573e-06	0.00116915	1	2	12716910	12742734	+	25825	4563	0.476495	0.504274	0.470533	protein_coding
FAM184A	ENSG00000111879	5.25172	1.38118	0.000258612	0.0178479	1	6	118959763	119149387	-	189625	7689	0.395514	0.387827	0.395839	protein_coding
MIRLET7BHG	ENSG00000197182	4.47458	1.39147	0.00121486	0.0450306	1	22	46053869	46113928	+	60060	5719	0.568225	0.636125	0.561078	lncRNA
WASH3P	ENSG00000185596	4.66496	1.41285	0.00106965	0.0425889	1	15	101961603	101976543	+	14941	2337	0.540361	0.591784	0.530826	transcribed_unprocessed_pseudogene
MFNG	ENSG00000100060	4.61302	1.41744	0.000794495	0.0347874	1	22	37469063	37486393	-	17331	3023	0.566532	0.595766	0.560355	protein_coding
MEX3D	ENSG00000181588	4.92361	1.42094	0.000256721	0.0178022	1	19	1554672	1568325	-	13654	3112	0.610489	0.691517	0.586567	protein_coding
LBH	ENSG00000213626	6.03388	1.43001	0.000858504	0.036595	1	2	30231534	30323730	+	92197	4525	0.469641	0.549834	0.465502	protein_coding
ADRB1	ENSG00000043591	6.40997	1.4521	5.41644e-05	0.0059924	1	10	114043866	114046904	+	3039	3038	0.587887	0.587887	0	protein_coding
ENSG00000275266	ENSG00000275266	4.95227	1.45312	0.000289617	0.019343	1	11	1996540	1996610	+	71	70	0.771429	0.771429	0	misc_RNA
NHSL2	ENSG00000204131	2.44789	1.47055	0.000213814	0.01573	1	X	71910818	72161750	+	250933	17695	0.453306	0.470698	0.451987	protein_coding
KCNC4	ENSG00000116396	3.99108	1.48236	0.000184557	0.0140778	1	1	110210314	110283100	+	72787	26065	0.49886	0.529062	0.48201	protein_coding
TBX2	ENSG00000121068	7.36174	1.49642	0.00059401	0.0293459	1	17	61399843	61409466	+	9624	6077	0.612803	0.622511	0.596165	protein_coding
LINC00689	ENSG00000231419	2.42723	1.49938	0.000161266	0.0128419	1	7	159006522	159030195	+	23674	9151	0.527605	0.536007	0.522311	lncRNA
NXPH4	ENSG00000182379	1.84246	1.50211	0.000774914	0.034345	1	12	57216794	57226449	+	9656	2147	0.602071	0.652538	0.58764	protein_coding
WFDC1	ENSG00000103175	6.01313	1.53187	0.000717375	0.0326947	1	16	84294846	84329844	+	34999	8573	0.498343	0.509507	0.494721	protein_coding
ENSG00000259605	ENSG00000259605	1.43116	1.54846	0.000111175	0.0100078	1	19	45764785	45769806	+	5022	2598	0.678351	0.67244	0.684688	lncRNA
CCDC194	ENSG00000269720	2.19489	1.55672	0.000200158	0.0149531	1	19	17390509	17394158	-	3650	1460	0.576048	0.623973	0.544084	protein_coding
NPDC1	ENSG00000107281	5.43382	1.56481	0.000434331	0.0242106	1	9	137039463	137046179	-	6717	2712	0.65813	0.667773	0.651598	protein_coding
SLC9A3R2	ENSG00000065054	6.16217	1.56966	9.1296e-05	0.00888023	1	16	2025356	2039026	+	13671	3505	0.646086	0.677603	0.635219	protein_coding
CCND1	ENSG00000110092	6.86544	1.61888	2.75844e-07	0.000153762	1	11	69641156	69654474	+	13319	4756	0.586349	0.524601	0.620649	protein_coding
LTK	ENSG00000062524	4.73053	1.62302	0.000168777	0.0130807	1	15	41503637	41513887	-	10251	3473	0.579024	0.63605	0.549801	protein_coding
CAVIN3	ENSG00000170955	5.02734	1.62636	0.000470638	0.0252628	1	11	6318946	6320532	-	1587	1555	0.64691	0.648232	0.580645	protein_coding
MAPK11	ENSG00000185386	3.7914	1.63075	0.000217243	0.0157425	1	22	50263713	50270767	-	7055	2676	0.653955	0.62855	0.669484	protein_coding
MEG9	ENSG00000223403	5.54207	1.64936	4.59424e-05	0.00546243	1	14	101068283	101072937	+	4655	4654	0.545337	0.545337	0	lncRNA
LINC01341	ENSG00000227953	2.07762	1.66048	0.000320157	0.0202622	1	1	246775880	246792385	+	16506	4764	0.523054	0.542821	0.515033	lncRNA
POSTN	ENSG00000133110	5.79613	1.70638	1.14947e-05	0.0022821	1	13	37562583	37598844	-	36262	5441	0.329417	0.356185	0.324692	protein_coding
CGNL1	ENSG00000128849	6.49306	1.75124	7.99465e-05	0.00827618	1	15	57375967	57550717	+	174751	8625	0.43814	0.506667	0.434582	protein_coding
HAP1	ENSG00000173805	2.76769	1.75669	0.000872405	0.0369701	1	17	41717742	41734644	-	16903	6210	0.544728	0.569565	0.530303	protein_coding
PARD6G	ENSG00000178184	3.22539	1.76066	9.76273e-05	0.00929676	1	18	80157232	80247514	-	90283	4187	0.474912	0.514927	0.472966	protein_coding
SCARB1	ENSG00000073060	7.79198	1.7697	0.000787404	0.0346802	1	12	124776856	124882668	-	105813	14870	0.514535	0.527438	0.512426	protein_coding
GDF7	ENSG00000143869	2.10398	1.7718	0.000166974	0.0130399	1	2	20667144	20679243	+	12100	9265	0.545913	0.533189	0.587509	protein_coding
LINC00648	ENSG00000259129	1.83246	1.78131	0.000151396	0.0123756	1	14	47764954	47795302	-	30349	3249	0.35485	0.414589	0.347688	lncRNA
SLC44A4	ENSG00000204385	2.85127	1.80139	0.00115963	0.0443311	1	6	31863192	31879046	-	15855	3347	0.536268	0.550941	0.532342	protein_coding
NOSTRIN	ENSG00000163072	4.34985	1.81058	7.42351e-10	1.07589e-06	1	2	168786539	168865514	+	78976	5225	0.411257	0.421244	0.410549	protein_coding
TMEM88	ENSG00000167874	2.73801	1.81786	0.000158497	0.0127616	1	17	7855066	7856099	+	1034	872	0.631171	0.629587	0.639752	protein_coding
BMP6	ENSG00000153162	4.70644	1.82712	0.00102845	0.0412891	1	6	7726099	7881728	+	155630	3777	0.434803	0.556791	0.431769	protein_coding
ADORA1	ENSG00000163485	2.93319	1.82922	0.000234694	0.0167763	1	1	203090654	203167405	+	76752	4182	0.481427	0.598757	0.474665	protein_coding
NDUFA4L2	ENSG00000185633	5.25432	1.87608	7.8633e-05	0.00819877	1	12	57234903	57240715	-	5813	2800	0.620613	0.625357	0.616202	protein_coding
PIK3R3	ENSG00000117461	3.36808	1.89713	3.60625e-05	0.00467495	1	1	46040140	46133036	-	92897	7386	0.402665	0.464798	0.397299	protein_coding
ACTA2	ENSG00000107796	7.80579	1.90774	3.70457e-05	0.00467495	1	10	88935074	88991339	-	56266	2966	0.402897	0.493931	0.397831	protein_coding
SPAAR	ENSG00000235387	1.47802	1.91056	0.000317938	0.0202622	1	9	35909490	35937153	+	27664	2894	0.444384	0.514167	0.436231	protein_coding
LINC01004	ENSG00000228393	1.744	1.94905	6.0383e-05	0.00652358	1	7	104950315	105013044	-	62730	1479	0.420013	0.363759	0.421371	lncRNA
ID1	ENSG00000125968	5.59261	1.96998	0.00071681	0.0326947	1	20	31605283	31606515	+	1233	1232	0.586039	0.586039	0	protein_coding
MYH11	ENSG00000133392	8.05288	1.99069	0.000789654	0.0346802	1	16	15703135	15857028	-	153894	17687	0.481646	0.534856	0.474737	protein_coding
CCDC3	ENSG00000151468	4.1857	2.0077	0.00039293	0.0230556	1	10	12896625	13099652	-	203028	3691	0.437311	0.543484	0.435345	protein_coding
SMAD6	ENSG00000137834	5.23688	2.03006	1.59324e-06	0.000607652	1	15	66702236	66782849	+	80614	8551	0.508255	0.565899	0.501415	protein_coding
CARMN	ENSG00000249669	4.85179	2.04343	2.10162e-05	0.0032403	1	5	149406689	149432835	+	26147	17997	0.519659	0.522809	0.512701	lncRNA
SMAD9	ENSG00000120693	3.12378	2.06007	0.000270335	0.0183083	1	13	36844831	36920765	-	75935	5825	0.410659	0.433648	0.408749	protein_coding
CEACAM1	ENSG00000079385	4.53742	2.0619	1.44001e-06	0.000574021	1	19	42507304	42561234	-	53931	5512	0.47519	0.484761	0.474101	protein_coding
ACVRL1	ENSG00000139567	6.91041	2.08469	1.40235e-06	0.000574021	1	12	51906908	51923361	+	16454	4950	0.548411	0.586061	0.532209	protein_coding
PPP1R14A	ENSG00000167641	3.97588	2.08553	0.000456983	0.0250937	1	19	38251237	38256532	-	5296	1438	0.582814	0.656467	0.555354	protein_coding
VANGL2	ENSG00000162738	3.13432	2.12397	2.14517e-05	0.0032471	1	1	160400564	160428670	+	28107	5346	0.516616	0.536102	0.512039	protein_coding
LIPE	ENSG00000079435	2.3656	2.13899	5.59251e-08	4.5029e-05	1	19	42401514	42427388	-	25875	5147	0.549664	0.612007	0.534182	protein_coding
MARCHF4	ENSG00000144583	0.604854	2.16632	0.000389994	0.0230317	1	2	216257865	216372483	-	114619	4899	0.445201	0.581956	0.439094	protein_coding
CCM2L	ENSG00000101331	3.47729	2.1673	0.00110101	0.0430861	1	20	32010438	32032180	+	21743	2589	0.501656	0.638857	0.48311	protein_coding
OTUB2	ENSG00000089723	2.56412	2.16874	8.19999e-05	0.00835599	1	14	94026340	94048930	+	22591	4235	0.527667	0.516175	0.530319	protein_coding
HIGD1B	ENSG00000131097	3.22704	2.20784	0.00119651	0.0447916	1	17	44846353	44850476	+	4124	868	0.524618	0.546083	0.518894	protein_coding
ZNF503.AS1	ENSG00000226051	0.891876	2.21896	0.000103434	0.00942815	1	10	75243568	75373500	+	129933	5256	0.452783	0.501712	0.45072	lncRNA
SOX18	ENSG00000203883	4.14334	2.23173	6.07661e-05	0.00652358	1	20	64047582	64049639	-	2058	1860	0.706855	0.693548	0.832487	protein_coding
MMRN2	ENSG00000173269	6.1563	2.23391	0.000652056	0.0306826	1	10	86935540	86969481	-	33942	5076	0.550897	0.577423	0.546232	protein_coding
ENSG00000286406	ENSG00000286406	1.12008	2.24506	0.00107568	0.0427118	1	22	11827523	11910358	+	82836	4192	0.380491	0.359733	0.381598	transcribed_unprocessed_pseudogene
RASA4	ENSG00000105808	2.19692	2.25799	0.00035406	0.0218132	1	7	102573807	102616756	-	42950	8053	0.555985	0.595182	0.546939	protein_coding
FOXS1	ENSG00000179772	1.31125	2.26982	1.92744e-06	0.000716268	1	20	31844303	31845604	-	1302	1301	0.641814	0.641814	0	protein_coding
ENSG00000233251	ENSG00000233251	4.40078	2.29293	1.03717e-05	0.00221054	1	2	56173534	56185870	-	12337	4364	0.473654	0.449817	0.486703	lncRNA
HMCN1	ENSG00000143341	2.14379	2.32398	0.000311123	0.020043	1	1	185734391	186190949	+	456559	18631	0.359858	0.444635	0.356251	protein_coding
CPS1	ENSG00000021826	2.24179	2.33698	1.11498e-05	0.00224865	1	2	210477682	210679107	+	201426	10972	0.363093	0.416606	0.36001	protein_coding
PCYT1B	ENSG00000102230	0.831281	2.38464	2.85607e-05	0.00401874	1	X	24558087	24672677	-	114591	5657	0.423789	0.481174	0.420809	protein_coding
NRN1	ENSG00000124785	3.91407	2.39395	2.95014e-08	2.85042e-05	1	6	5997999	6007605	-	9607	2279	0.527483	0.515138	0.531323	protein_coding
IGFBP5	ENSG00000115461	8.49357	2.39787	0.000253705	0.0178022	1	2	216672105	216695549	-	23445	6462	0.507635	0.521046	0.502532	protein_coding
SPNS2	ENSG00000183018	3.90577	2.42003	2.52447e-09	3.3261e-06	1	17	4498881	4539035	+	40155	4056	0.573791	0.645957	0.565682	protein_coding
OLFM2	ENSG00000105088	2.15688	2.43516	0.000488948	0.0259572	1	19	9853718	9936515	-	82798	2455	0.505127	0.627699	0.501382	protein_coding
OR51E1	ENSG00000180785	2.05377	2.43677	5.76416e-11	2.0885e-07	1	11	4643420	4655488	+	12069	3610	0.434455	0.433518	0.434855	protein_coding
PGM5	ENSG00000154330	2.16837	2.49209	0.00025622	0.0178022	1	9	68328308	68531061	+	202754	7691	0.402934	0.464179	0.400519	protein_coding
EBF3	ENSG00000108001	1.57357	2.52731	0.00141442	0.0497554	1	10	129835233	129973053	-	137821	7576	0.496009	0.477825	0.497067	protein_coding
TMEM74B	ENSG00000125895	4.27211	2.53932	9.20951e-06	0.00202233	1	20	1180561	1185415	-	4855	2513	0.557478	0.604457	0.507048	protein_coding
JAM2	ENSG00000154721	5.67051	2.54188	3.96279e-07	0.000198044	1	21	25639258	25717562	+	78305	5935	0.396531	0.437574	0.393166	protein_coding
PRX	ENSG00000105227	4.10758	2.58036	1.35885e-18	1.96938e-14	1	19	40393766	40414793	-	21028	7388	0.55833	0.614645	0.527825	protein_coding
DNAH2	ENSG00000183914	2.24315	2.58938	2.63467e-05	0.00374356	1	17	7717354	7833744	+	116391	17145	0.48426	0.539341	0.474744	protein_coding
SALL1	ENSG00000103449	1.38684	2.60298	0.00108506	0.0428497	1	16	51135975	51151367	-	15393	5655	0.444517	0.499735	0.412447	protein_coding
LGI4	ENSG00000153902	2.67564	2.60942	1.29568e-08	1.34131e-05	1	19	35124513	35142451	-	17939	4524	0.557309	0.606985	0.540555	protein_coding
GRIP2	ENSG00000144596	4.40038	2.61273	9.4037e-08	7.17304e-05	1	3	14489107	14556075	-	66969	11866	0.523459	0.573487	0.512686	protein_coding
DAAM2.AS1	ENSG00000235033	2.11827	2.62328	0.00139112	0.0495857	1	6	39881804	39900071	-	18268	6847	0.480922	0.523149	0.455604	lncRNA
TAFA2	ENSG00000198673	0.431085	2.62347	0.000449413	0.0248601	1	12	61708273	62279150	-	570878	9146	0.367981	0.421605	0.367108	protein_coding
ERVFRD.1	ENSG00000244476	5.4058	2.63616	2.17151e-07	0.000131132	1	6	11102489	11111725	-	9237	3233	0.469684	0.472317	0.468266	protein_coding
PART1	ENSG00000152931	0.293571	2.64068	0.000388515	0.0230317	1	5	60487713	60548813	+	61101	12695	0.399656	0.425207	0.392955	lncRNA
ADAMTS18	ENSG00000140873	3.83674	2.67281	0.000821577	0.0356501	1	16	77247813	77435034	-	187222	6572	0.397445	0.470633	0.394782	protein_coding
MATN3	ENSG00000132031	2.25888	2.71912	8.24471e-05	0.00835599	1	2	19992052	20012668	-	20617	3143	0.425058	0.440025	0.422366	protein_coding
NRARP	ENSG00000198435	2.99243	2.77237	4.43684e-06	0.00116915	1	9	137299631	137302271	-	2641	2640	0.592045	0.592045	0	protein_coding
CHRM2	ENSG00000181072	0.521211	2.77899	3.6618e-05	0.00467495	1	7	136868652	137020255	+	151604	8332	0.371596	0.448032	0.36715	protein_coding
HES4	ENSG00000188290	2.58684	2.78975	3.88441e-10	8.01551e-07	1	1	998962	1000172	-	1211	1116	0.743802	0.738351	0.808511	protein_coding
SRL	ENSG00000185739	0.669354	2.80498	0.000266149	0.018231	1	16	4189374	4242080	-	52707	5694	0.517987	0.555673	0.513422	protein_coding
TTLL10.AS1	ENSG00000205231	1.11887	2.81245	6.68114e-06	0.00166948	1	1	1173056	1179555	-	6500	3530	0.610248	0.617847	0.601213	lncRNA
SELP	ENSG00000174175	1.43056	2.84936	1.46545e-06	0.000574021	1	1	169588849	169630193	-	41345	3473	0.404823	0.48258	0.397692	protein_coding
SMOC1	ENSG00000198732	3.19364	2.93304	8.9445e-06	0.00202233	1	14	69854131	70032366	+	178236	4354	0.454254	0.539274	0.452125	protein_coding
LINC01150	ENSG00000229671	1.78083	3.03571	2.41167e-07	0.000139809	1	11	1897015	1908656	+	11642	1294	0.461558	0.468315	0.460713	lncRNA
TCF15	ENSG00000125878	1.13471	3.05894	2.39831e-06	0.000847774	1	20	604257	610309	-	6053	1004	0.567581	0.694223	0.542393	protein_coding
CNTNAP3B	ENSG00000154529	2.23695	3.0686	3.53416e-06	0.00102441	1	9	41890314	42129510	-	239197	13194	0.382536	0.41534	0.380621	protein_coding
KL	ENSG00000133116	4.02907	3.07598	5.30374e-06	0.00137263	1	13	33016423	33066143	+	49721	5059	0.404344	0.455426	0.398558	protein_coding
ENSG00000279518	ENSG00000279518	0.421986	3.10844	0.000506398	0.026546	1	8	134783694	134785879	-	2186	2185	0.353318	0.353318	0	TEC
PLVAP	ENSG00000130300	4.86272	3.17274	1.12465e-08	1.25381e-05	1	19	17351450	17377342	-	25893	2289	0.517071	0.601573	0.508876	protein_coding
ADGRB1	ENSG00000181790	2.37419	3.2282	1.12613e-06	0.000510033	1	8	142449430	142545009	+	95580	7326	0.626675	0.680317	0.622222	protein_coding
ENSG00000272512	ENSG00000272512	0.626487	3.22913	6.89215e-07	0.000322219	1	1	995966	998051	-	2086	2085	0.661871	0.661871	0	lncRNA
CDH6	ENSG00000113361	1.16314	3.3788	0.000127254	0.0109157	1	5	31193686	31329146	+	135461	12430	0.383065	0.415768	0.379761	protein_coding
GPER1	ENSG00000164850	1.67286	3.45421	1.44963e-05	0.00269458	1	7	1082208	1093815	+	11608	3119	0.558887	0.611735	0.539467	protein_coding
IL33	ENSG00000137033	3.60475	3.56157	2.10272e-10	5.07911e-07	1	9	6215786	6257983	+	42198	3244	0.377468	0.343095	0.38033	protein_coding
ASB2	ENSG00000100628	0.349681	3.89616	0.000148826	0.0122553	1	14	93934166	93976739	-	42574	4961	0.524393	0.582947	0.51667	protein_coding
HSPA7	ENSG00000225217	5.25307	3.99602	0.00031983	0.0202622	1	1	161606291	161608217	+	1927	1926	0.61163	0.61163	0	unprocessed_pseudogene
FCN3	ENSG00000142748	1.05528	4.02236	4.58326e-10	8.01551e-07	1	1	27369110	27374824	-	5715	2164	0.544452	0.57902	0.52338	protein_coding
FCGR2B	ENSG00000072694	4.61029	4.26387	1.08497e-10	3.1449e-07	1	1	161663147	161678654	+	15508	6646	0.472432	0.488565	0.460332	protein_coding
CLEC3B	ENSG00000163815	0.830242	4.42441	3.32187e-07	0.000171943	1	3	45001548	45036071	+	34524	980	0.477218	0.622449	0.472975	protein_coding
NNAT	ENSG00000053438	2.43458	5.73574	1.81661e-05	0.00306421	1	20	37521206	37523690	+	2485	1326	0.541868	0.581448	0.496546	protein_coding
RAMP3	ENSG00000122679	0.756879	6.32394	2.23416e-14	1.61898e-10	1	7	45157791	45186302	+	28512	1423	0.51289	0.602249	0.508196	protein_coding

## Sheet: DEGs LB vs iSB
Ensembl ID	geneId	avgLog2CPM	avgLog2FC	P.Value	FDR	DE	chromosome	startPos	endPos	geneStrand	geneLength	exonLength	geneGC	exonGC	intronGC	geneType
PSG7	ENSG00000221878	2.38287	-10.5736	2.82864e-08	1.74097e-05	-1	19	42924132	42937207	-	13076	4818	0.45369	0.458489	0.45089	protein_coding
NAV2.AS4	ENSG00000254622	-0.851507	-7.60848	0.000932015	0.0199179	-1	11	19510890	19519896	-	9007	1178	0.459138	0.48472	0.455289	lncRNA
ENSG00000287326	ENSG00000287326	-0.278354	-7.30144	1.82161e-05	0.00152332	-1	10	126425930	126460957	+	35028	2964	0.421418	0.506748	0.41353	lncRNA
KISS1	ENSG00000170498	5.38432	-7.26981	5.78394e-06	0.000695293	-1	1	204190341	204196491	-	6151	711	0.516911	0.656821	0.498621	protein_coding
GH2	ENSG00000136487	4.3553	-7.24291	2.19556e-05	0.00172363	-1	17	63880215	63881944	-	1730	1152	0.565067	0.565104	0.564991	protein_coding
PSG10P	ENSG00000248257	-0.887209	-7.17525	0.000229055	0.00778029	-1	19	42839368	42855718	-	16351	1811	0.442324	0.482054	0.437375	transcribed_unprocessed_pseudogene
CSHL1	ENSG00000204414	4.15846	-7.12165	0.000115659	0.00496101	-1	17	63909597	63918838	-	9242	1815	0.530137	0.567493	0.521007	protein_coding
LCAL1	ENSG00000286042	0.968496	-7.11942	0.000291343	0.00893007	-1	6	79307669	79313384	-	5716	4494	0.505162	0.504228	0.5086	lncRNA
PSG8	ENSG00000124467	3.21625	-7.0248	1.71863e-05	0.001453	-1	19	42752686	42855691	-	103006	4082	0.426183	0.490446	0.423531	protein_coding
CSH2	ENSG00000213218	8.05537	-7.02239	6.13439e-06	0.000710971	-1	17	63872012	63873766	-	1755	1754	0.567275	0.567275	0	protein_coding
PSG1	ENSG00000231924	6.70513	-6.65733	7.78392e-05	0.00380226	-1	19	42866464	42879822	-	13359	4953	0.457554	0.442762	0.46627	protein_coding
ENSG00000259701	ENSG00000259701	1.56358	-6.50364	4.32691e-05	0.00264199	-1	15	51278927	51280015	-	1089	361	0.436581	0.412742	0.448418	lncRNA
IGHA2	ENSG00000211890	0.16074	-6.49624	0.000102581	0.0046288	-1	14	105583731	105588395	-	4665	1425	0.60699	0.630175	0.596789	IG_C_gene
LINC00474	ENSG00000204148	-0.120117	-6.47781	0.000200049	0.00712537	-1	9	115888169	115925207	-	37039	766	0.365516	0.399478	0.364799	lncRNA
TRIM40	ENSG00000204614	1.45599	-6.42468	0.00041946	0.0115667	-1	6	30136124	30148735	+	12612	2475	0.426929	0.519192	0.4044	protein_coding
PSG9	ENSG00000183668	6.02019	-6.36748	0.000159979	0.00610819	-1	19	43211791	43269530	-	57740	5041	0.420738	0.456259	0.41734	protein_coding
ENSG00000270977	ENSG00000270977	3.1105	-6.36414	7.65589e-05	0.0037711	-1	17	35893707	35911651	-	17945	6374	0.461157	0.480075	0.450735	transcribed_processed_pseudogene
PSG8.AS1	ENSG00000225877	-0.032766	-6.35798	5.26101e-05	0.00293301	-1	19	42821863	42826878	+	5016	1869	0.478365	0.532905	0.445963	lncRNA
PSG6	ENSG00000170848	5.31662	-6.35277	0.000119995	0.00503274	-1	19	42902086	42919563	-	17478	5125	0.455627	0.511024	0.432642	protein_coding
ALPP	ENSG00000163283	5.65418	-6.35052	0.000161	0.00612061	-1	2	232378724	232382889	+	4166	2859	0.622809	0.613851	0.64242	protein_coding
CCK	ENSG00000187094	0.369853	-6.31036	0.00079986	0.0180726	-1	3	42257825	42266185	-	8361	2057	0.477871	0.548858	0.454704	protein_coding
ENSG00000227733	ENSG00000227733	-0.464531	-6.30417	0.00215223	0.0350437	-1	1	148159213	148255012	-	95800	16029	0.408136	0.455549	0.398608	lncRNA
PSG11	ENSG00000243130	5.06267	-6.28374	1.03258e-05	0.00101531	-1	19	43007656	43026474	-	18819	4984	0.43198	0.45947	0.422076	protein_coding
KRTAP26.1	ENSG00000197683	-0.46346	-6.27713	0.00228233	0.0364873	-1	21	30319124	30320315	-	1192	1191	0.47691	0.47691	0	protein_coding
LINC02291	ENSG00000197176	0.0544017	-6.26087	2.00667e-05	0.00163368	-1	14	97632647	97686658	-	54012	1933	0.423932	0.392654	0.425093	lncRNA
LINC00967	ENSG00000253138	1.87806	-6.22702	6.35272e-05	0.00337066	-1	8	66192093	66197315	+	5223	1998	0.441976	0.456957	0.432692	lncRNA
CSH1	ENSG00000136488	9.32556	-6.10507	0.000114739	0.00495924	-1	17	63894909	63896661	-	1753	1658	0.562785	0.554885	0.702128	protein_coding
PLAC4	ENSG00000280109	7.8667	-6.09149	8.50753e-06	0.000902795	-1	21	41175231	41186788	-	11558	10567	0.468893	0.467588	0.482828	lncRNA
ACOXL	ENSG00000153093	0.413548	-6.07345	6.79233e-05	0.00348554	-1	2	110732539	111120610	+	388072	8142	0.427692	0.5366	0.425358	protein_coding
ANKRD33	ENSG00000167612	1.53315	-6.00525	9.02284e-05	0.00423987	-1	12	51888009	51891727	+	3719	3718	0.58042	0.58042	0	protein_coding
ASB2	ENSG00000100628	0.349681	-5.95139	9.74354e-08	3.84602e-05	-1	14	93934166	93976739	-	42574	4961	0.524393	0.582947	0.51667	protein_coding
PSG3	ENSG00000221826	6.99372	-5.93639	4.40499e-05	0.00265975	-1	19	42721638	42740481	-	18844	3388	0.436342	0.47255	0.428405	protein_coding
ENSG00000261821	ENSG00000261821	1.69808	-5.92217	0.000237188	0.00789959	-1	15	74365435	74371211	+	5777	4943	0.509868	0.502529	0.553421	lncRNA
SH2D5	ENSG00000189410	2.77555	-5.89476	5.61338e-05	0.00307377	-1	1	20719731	20732837	-	13107	4473	0.613917	0.617036	0.612302	protein_coding
LINC01118	ENSG00000222005	0.158681	-5.85569	0.000332273	0.00971992	-1	2	46698940	46822804	+	123865	3351	0.400907	0.515667	0.397716	lncRNA
PSG4	ENSG00000243137	7.43985	-5.81352	0.000529167	0.0137539	-1	19	43192702	43207299	-	14598	6262	0.471809	0.492494	0.456269	protein_coding
CRH	ENSG00000147571	4.20427	-5.80172	0.000710233	0.0166787	-1	8	66176376	66178464	-	2089	1286	0.551245	0.53577	0.57606	protein_coding
HSD11B2	ENSG00000176387	4.55578	-5.74405	9.45766e-06	0.000949623	-1	16	67430652	67437553	+	6902	2663	0.598319	0.62148	0.583766	protein_coding
MFSD2A	ENSG00000168389	4.54309	-5.72105	0.000266296	0.00850633	-1	1	39955112	39969968	+	14857	3994	0.537022	0.54031	0.535813	protein_coding
ENSG00000268153	ENSG00000268153	1.5488	-5.68517	0.000699532	0.0165341	-1	19	39638685	39642401	+	3717	1831	0.442411	0.465319	0.420159	transcribed_unprocessed_pseudogene
ENSG00000226089	ENSG00000226089	-1.03494	-5.67162	0.00239441	0.0375564	-1	6	81527102	81534915	-	7814	784	0.339818	0.327806	0.341158	lncRNA
HLF	ENSG00000108924	1.20438	-5.5385	2.76903e-05	0.00196346	-1	17	55264960	55325187	+	60228	6765	0.432962	0.441242	0.431914	protein_coding
NCF4.AS1	ENSG00000183822	0.014065	-5.53459	0.000451821	0.0121968	-1	22	36847372	36870441	-	23070	1215	0.512679	0.511934	0.512721	lncRNA
OLAH	ENSG00000152463	1.18115	-5.50605	0.0023616	0.0372696	-1	10	15032227	15073853	+	41627	2322	0.430668	0.429371	0.430745	protein_coding
LINC00656	ENSG00000233746	-0.369807	-5.45108	0.000275756	0.00858919	-1	20	23125068	23132635	-	7568	1906	0.529404	0.544596	0.524289	lncRNA
LINC01119	ENSG00000239332	0.388351	-5.44174	4.57837e-05	0.00275185	-1	2	46816697	46859007	+	42311	4065	0.480525	0.495203	0.478965	lncRNA
LGALS14	ENSG00000006659	2.97172	-5.41937	5.7982e-05	0.00313042	-1	19	39704481	39709444	+	4964	899	0.451944	0.476085	0.446604	protein_coding
ENSG00000254290	ENSG00000254290	-0.177013	-5.39465	7.67112e-05	0.0037711	-1	8	37597480	37599858	-	2379	2378	0.51598	0.51598	0	lncRNA
PSG5	ENSG00000204941	6.34886	-5.37671	0.00064195	0.0157038	-1	19	43166256	43186536	-	20281	4668	0.43146	0.450943	0.425634	protein_coding
CGB5	ENSG00000189052	2.10209	-5.29139	0.00239887	0.037588	-1	19	49043848	49045311	+	1464	874	0.649351	0.653318	0.643463	protein_coding
IGHA1	ENSG00000211895	2.53218	-5.23698	0.00124721	0.0241793	-1	14	105703995	105708665	-	4671	1417	0.606852	0.632322	0.595758	IG_C_gene
TREML2	ENSG00000112195	3.05957	-5.23593	0.000509943	0.0134375	-1	6	41189749	41201149	-	11401	3780	0.51114	0.55	0.491864	protein_coding
RAMP3	ENSG00000122679	0.756879	-5.2328	2.27359e-12	1.74919e-08	-1	7	45157791	45186302	+	28512	1423	0.51289	0.602249	0.508196	protein_coding
LINC02365	ENSG00000254233	-0.171642	-5.13258	0.00171972	0.0300356	-1	4	184584093	184625030	-	40938	1264	0.452818	0.449367	0.452928	lncRNA
ENSG00000284309	ENSG00000284309	0.233091	-5.11722	0.000281475	0.00873198	-1	1	26046665	26049099	+	2435	939	0.48521	0.522897	0.461538	lncRNA
ENSG00000266088	ENSG00000266088	0.117805	-5.0831	0.000355657	0.0101838	-1	17	40516892	40527002	+	10111	1327	0.485064	0.463451	0.48833	lncRNA
TRIM17	ENSG00000162931	-0.117902	-5.07658	6.30496e-05	0.0033569	-1	1	228407935	228416861	-	8927	3547	0.567443	0.59938	0.546384	protein_coding
LINC02533	ENSG00000260239	0.602985	-5.06315	4.00885e-06	0.000538558	-1	6	4488798	4495769	+	6972	2976	0.458758	0.474462	0.447059	lncRNA
ENDOU	ENSG00000111405	3.40743	-5.03347	0.000726362	0.0169056	-1	12	47709734	47725567	-	15834	2669	0.489484	0.487448	0.489897	protein_coding
CSPG4P13	ENSG00000260139	-0.0834548	-4.97178	4.11844e-05	0.002545	-1	15	77894684	77904674	+	9991	4811	0.598899	0.621285	0.578104	transcribed_unprocessed_pseudogene
TCL6	ENSG00000187621	3.24887	-4.93611	1.84531e-06	0.00033016	-1	14	95650498	95679833	+	29336	10553	0.463644	0.473609	0.458045	lncRNA
IGHE	ENSG00000211891	0.208301	-4.83945	0.00098086	0.02059	-1	14	105597691	105601728	-	4038	1612	0.654694	0.633375	0.668866	IG_C_gene
SH3TC2.DT	ENSG00000250072	0.566391	-4.82094	1.12002e-05	0.00106381	-1	5	149063254	149129578	+	66325	4818	0.412897	0.438564	0.410887	lncRNA
MORN3	ENSG00000139714	2.08835	-4.70852	0.000104857	0.00466309	-1	12	121648742	121672631	-	23890	3849	0.506635	0.515199	0.50499	protein_coding
DPEP2NB	ENSG00000263201	-0.392181	-4.59422	0.00263692	0.0397398	-1	16	68013436	68015911	-	2476	1183	0.50101	0.519019	0.48452	protein_coding
MISP3	ENSG00000141854	1.4744	-4.56905	0.000177132	0.00659595	-1	19	14072536	14075062	+	2527	2352	0.677751	0.671344	0.764368	protein_coding
SEMA3B	ENSG00000012171	7.64562	-4.55275	0.000513091	0.0134956	-1	3	50267558	50277546	+	9989	5756	0.607129	0.635858	0.568053	protein_coding
HSD17B1P1	ENSG00000108785	3.54693	-4.55214	5.32091e-07	0.000124612	-1	17	42546764	42548706	+	1943	949	0.641607	0.645943	0.637462	unprocessed_pseudogene
NECTIN4.AS1	ENSG00000228917	0.47595	-4.54643	0.000679802	0.016313	-1	1	161084465	161087571	+	3107	1106	0.550225	0.537071	0.5575	lncRNA
LINC00482	ENSG00000185168	1.20984	-4.53194	0.000517791	0.013564	-1	17	81303771	81309248	-	5478	2193	0.614022	0.627451	0.605055	lncRNA
NCCRP1	ENSG00000188505	0.694023	-4.51223	0.00172648	0.0301194	-1	19	39196964	39201884	+	4921	1969	0.568089	0.584053	0.557438	protein_coding
ENSG00000279662	ENSG00000279662	0.642246	-4.49172	0.000110914	0.00486219	-1	16	10445309	10449747	-	4439	4438	0.417981	0.417981	0	TEC
LINC01485	ENSG00000254211	-0.489028	-4.46287	0.000309048	0.00928774	-1	5	173778527	173809039	-	30513	5995	0.469258	0.465721	0.470123	lncRNA
SLAMF1	ENSG00000117090	0.852094	-4.45008	0.00046141	0.0123904	-1	1	160608106	160647295	-	39190	4255	0.422568	0.454759	0.418647	protein_coding
PPP1R14C	ENSG00000198729	1.77982	-4.44635	4.99343e-05	0.00284225	-1	6	150143044	150250392	+	107349	2215	0.439198	0.473589	0.438473	protein_coding
LINC00939	ENSG00000249267	0.0226974	-4.41493	0.000624524	0.0155285	-1	12	125958688	125983665	-	24978	6796	0.415302	0.422307	0.412684	lncRNA
RAB3B	ENSG00000169213	3.67562	-4.38076	6.50213e-05	0.003403	-1	1	51907956	51990700	-	82745	12775	0.4435	0.446654	0.442925	protein_coding
TMPRSS6	ENSG00000187045	0.475106	-4.36305	0.00364126	0.0486053	-1	22	37065436	37109713	-	44278	4211	0.552657	0.609119	0.546723	protein_coding
PHYHIPL	ENSG00000165443	2.85539	-4.36096	7.50437e-05	0.0037465	-1	10	59176643	59247774	+	71132	4033	0.35152	0.373171	0.350219	protein_coding
MTNR1B	ENSG00000134640	-0.243856	-4.31976	0.00195205	0.0327548	-1	11	92969651	92985066	+	15416	2021	0.471554	0.579911	0.455204	protein_coding
SDC1	ENSG00000115884	7.18737	-4.29126	0.000534645	0.0138495	-1	2	20200797	20225433	-	24637	3605	0.575621	0.599168	0.571585	protein_coding
ENSG00000251411	ENSG00000251411	1.01181	-4.27502	0.00031334	0.00931141	-1	4	86913266	86914817	-	1552	1107	0.508059	0.498645	0.531532	processed_pseudogene
ENSG00000261632	ENSG00000261632	1.28617	-4.25076	0.000695405	0.0164872	-1	15	71972206	72040265	+	68060	776	0.374675	0.487113	0.373378	lncRNA
ENSG00000279518	ENSG00000279518	0.421986	-4.23278	5.94028e-06	0.0007031	-1	8	134783694	134785879	-	2186	2185	0.353318	0.353318	0	TEC
TCHH	ENSG00000159450	4.22069	-4.22315	0.00185384	0.0315702	-1	1	152106317	152115454	-	9138	6992	0.514611	0.560069	0.366434	protein_coding
CATSPERB	ENSG00000133962	-0.166902	-4.21461	0.00113642	0.0228575	-1	14	91580696	91780707	-	200012	5604	0.387289	0.392398	0.387141	protein_coding
SLC2A11	ENSG00000133460	5.29448	-4.17098	3.68079e-05	0.00235006	-1	22	23856703	23886309	+	29607	8876	0.50841	0.528729	0.499711	protein_coding
LINC01483	ENSG00000227517	0.271171	-4.16713	0.000523512	0.0136762	-1	17	69577251	69903000	+	325750	4442	0.385865	0.42751	0.385289	lncRNA
LGALS16	ENSG00000249861	0.868639	-4.15175	0.00029692	0.00904087	-1	19	39655913	39660647	+	4735	656	0.45564	0.466463	0.453899	protein_coding
RELL2	ENSG00000164620	3.23244	-4.15139	3.73425e-05	0.00237434	-1	5	141636950	141641064	+	4115	2576	0.599903	0.649068	0.517555	protein_coding
NOS3	ENSG00000164867	4.49394	-4.14593	3.12144e-05	0.00210656	-1	7	150991017	151014588	+	23572	5902	0.575962	0.599458	0.568114	protein_coding
LYPD5	ENSG00000159871	1.93894	-4.11795	2.94462e-05	0.00204691	-1	19	43785874	43827206	-	41333	5320	0.447039	0.485902	0.441297	protein_coding
SYNGR3	ENSG00000127561	1.5166	-4.10419	0.00250563	0.0386702	-1	16	1989660	1994275	+	4616	3389	0.665439	0.637946	0.741436	protein_coding
NCMAP	ENSG00000184454	2.45732	-4.09397	0.00088836	0.0193617	-1	1	24556087	24609328	+	53242	4141	0.479255	0.474282	0.479674	protein_coding
ENSG00000275393	ENSG00000275393	0.0553925	-4.07829	0.00226877	0.0364277	-1	16	85697335	85697868	-	534	533	0.485929	0.485929	0	lncRNA
BEST4	ENSG00000142959	-0.0651712	-4.04225	0.00075896	0.0173523	-1	1	44783585	44788170	-	4586	2503	0.588441	0.581302	0.597022	protein_coding
CLEC3B	ENSG00000163815	0.830242	-4.04195	2.68499e-06	0.000411359	-1	3	45001548	45036071	+	34524	980	0.477218	0.622449	0.472975	protein_coding
GDF15	ENSG00000130513	7.20546	-4.03921	0.0017405	0.0302761	-1	19	18374731	18389176	+	14446	2082	0.51928	0.600865	0.505541	protein_coding
HSD3B1	ENSG00000203857	6.49208	-4.02195	0.0029385	0.042535	-1	1	119507198	119515054	+	7857	2439	0.445265	0.466995	0.435481	protein_coding
INSL4	ENSG00000120211	3.50415	-4.02043	4.97636e-05	0.00284225	-1	9	5231419	5235304	+	3886	1950	0.399485	0.420513	0.378295	protein_coding
LINC01484	ENSG00000253686	-0.483992	-3.9995	0.00190593	0.0322269	-1	5	173707614	173746279	-	38666	5408	0.486409	0.477626	0.487837	lncRNA
CATIP	ENSG00000158428	1.30775	-3.98421	0.000149653	0.00585931	-1	2	218356857	218368099	+	11243	3813	0.520726	0.553895	0.503702	protein_coding
ENSG00000266830	ENSG00000266830	-0.0698328	-3.92538	0.0032333	0.0451459	-1	17	28246454	28248006	-	1553	1552	0.592784	0.592784	0	lncRNA
MARCHF4	ENSG00000144583	0.604854	-3.91586	7.21656e-09	6.94007e-06	-1	2	216257865	216372483	-	114619	4899	0.445201	0.581956	0.439094	protein_coding
ENSG00000255836	ENSG00000255836	2.78091	-3.84662	1.24888e-07	4.57536e-05	-1	12	7438780	7439990	-	1211	1210	0.461983	0.461983	0	processed_pseudogene
TFPI2	ENSG00000105825	9.44584	-3.80933	0.00350962	0.0477251	-1	7	93885396	93890753	-	5358	2439	0.38193	0.378434	0.384853	protein_coding
RNF5P1	ENSG00000253570	-0.349029	-3.80164	0.00142038	0.0263635	-1	8	38600661	38601200	-	540	539	0.57885	0.57885	0	processed_pseudogene
HOPX	ENSG00000171476	4.75933	-3.79997	0.000209087	0.00732853	-1	4	56647988	56681899	-	33912	7746	0.429418	0.454944	0.421861	protein_coding
RAP1GAP	ENSG00000076864	3.30741	-3.79349	8.55203e-05	0.00408665	-1	1	21596215	21669363	-	73149	5723	0.566318	0.617334	0.561987	protein_coding
ENSG00000260711	ENSG00000260711	0.00185153	-3.77305	0.0032803	0.0455386	-1	14	91752856	91759798	-	6943	6942	0.3862	0.3862	0	lncRNA
ENSG00000227836	ENSG00000227836	0.00749847	-3.7587	0.00209068	0.0344795	-1	5	96942299	96943184	+	886	360	0.453107	0.405556	0.485714	processed_pseudogene
LINC01949	ENSG00000288569	5.76084	-3.74224	0.000185304	0.0067726	-1	5	87205408	87240145	-	34738	3360	0.370268	0.452679	0.361443	lncRNA
ADAM12	ENSG00000148848	9.38455	-3.73715	0.00219376	0.035607	-1	10	126012381	126388477	-	376097	9856	0.431119	0.474939	0.429939	protein_coding
CDH6	ENSG00000113361	1.16314	-3.71543	3.99425e-05	0.00247821	-1	5	31193686	31329146	+	135461	12430	0.383065	0.415768	0.379761	protein_coding
ENSG00000272512	ENSG00000272512	0.626487	-3.69036	1.90702e-08	1.27579e-05	-1	1	995966	998051	-	2086	2085	0.661871	0.661871	0	lncRNA
SH3TC2	ENSG00000169247	4.8365	-3.67334	5.64409e-05	0.00307409	-1	5	148923639	149063163	-	139525	38093	0.425088	0.423647	0.425629	protein_coding
SYT12	ENSG00000173227	2.30824	-3.66956	0.00088326	0.0193325	-1	11	67006778	67050863	+	44086	11027	0.536804	0.562075	0.528374	protein_coding
ENSG00000260971	ENSG00000260971	1.28848	-3.66688	7.83911e-05	0.0038171	-1	1	56154545	56477687	-	323143	7853	0.409804	0.407233	0.409868	lncRNA
LINC01355	ENSG00000261326	1.90319	-3.65829	4.14997e-06	0.00055048	-1	1	23281307	23287488	-	6182	6181	0.369519	0.369519	0	lncRNA
HSPA7	ENSG00000225217	5.25307	-3.65478	0.00162734	0.0288478	-1	1	161606291	161608217	+	1927	1926	0.61163	0.61163	0	unprocessed_pseudogene
VNN3	ENSG00000093134	1.00576	-3.65426	0.000308161	0.00927922	-1	6	132722787	132736935	-	14149	6009	0.37341	0.380429	0.368227	protein_coding
PPP1R14B.AS1	ENSG00000256940	0.20456	-3.65178	0.00375185	0.0495109	-1	11	64245961	64248218	+	2258	846	0.656624	0.573286	0.706591	lncRNA
ENSG00000286393	ENSG00000286393	-0.484301	-3.60122	5.15631e-05	0.00289562	-1	22	49662312	49664968	-	2657	1835	0.545934	0.52752	0.587089	lncRNA
CARD14	ENSG00000141527	1.39274	-3.57612	0.000288285	0.00887169	-1	17	80169992	80209331	+	39340	9481	0.542896	0.58074	0.530879	protein_coding
BCAR4	ENSG00000262117	2.51422	-3.57324	0.00110375	0.0224009	-1	16	11819829	11828845	-	9017	1324	0.453083	0.432779	0.456578	lncRNA
KIAA0319	ENSG00000137261	0.0233461	-3.55953	0.000645919	0.0157758	-1	6	24544104	24646191	-	102088	7185	0.41543	0.473904	0.411003	protein_coding
TMEM74B	ENSG00000125895	4.27211	-3.5561	2.67752e-09	2.7466e-06	-1	20	1180561	1185415	-	4855	2513	0.557478	0.604457	0.507048	protein_coding
FCGR2B	ENSG00000072694	4.61029	-3.55548	2.08015e-07	6.40147e-05	-1	1	161663147	161678654	+	15508	6646	0.472432	0.488565	0.460332	protein_coding
NRAD1	ENSG00000233725	0.613134	-3.55397	0.000638352	0.0156921	-1	13	43908669	44030461	+	121793	5152	0.403861	0.419449	0.403172	lncRNA
LCMT1.AS2	ENSG00000260034	7.0997	-3.54459	0.000177382	0.00659595	-1	16	25140577	25149032	-	8456	7988	0.478297	0.477717	0.488223	lncRNA
ENSG00000273108	ENSG00000273108	0.196096	-3.52072	0.00226351	0.0363935	-1	10	103608619	103610050	+	1432	1431	0.467505	0.467505	0	lncRNA
DHH	ENSG00000139549	-0.567266	-3.51476	4.02509e-06	0.000538558	-1	12	49086656	49094801	-	8146	4680	0.553714	0.553846	0.553535	protein_coding
TRPV6	ENSG00000165125	6.86847	-3.5123	0.00357817	0.048127	-1	7	142871208	142885745	-	14538	11894	0.510903	0.512864	0.502081	protein_coding
FAM167A	ENSG00000154319	1.24284	-3.44256	2.16395e-05	0.00171633	-1	8	11421476	11475908	-	54433	5039	0.525592	0.545743	0.523536	protein_coding
DEPDC1B	ENSG00000035499	3.72856	-3.43599	0.00164936	0.029171	-1	5	60596912	60700190	-	103279	3792	0.386268	0.378956	0.386547	protein_coding
CD200	ENSG00000091972	4.83017	-3.40894	0.000378563	0.0106684	-1	3	112332347	112362812	+	30466	2983	0.386082	0.450553	0.379084	protein_coding
ENSG00000284968	ENSG00000284968	2.75702	-3.3985	8.7058e-05	0.00414725	-1	4	86924630	86936202	-	11573	2795	0.448324	0.454383	0.446394	lncRNA
EPHB6	ENSG00000106123	2.5169	-3.38304	0.00206294	0.0341491	-1	7	142855061	142871094	+	16034	5309	0.523483	0.608778	0.481257	protein_coding
ERV3.1	ENSG00000213462	4.44915	-3.37228	0.000619112	0.0154899	-1	7	64990356	65006743	-	16388	5023	0.457253	0.449532	0.460665	protein_coding
SLC30A2	ENSG00000158014	3.68332	-3.36696	0.00195103	0.0327548	-1	1	26037252	26046118	-	8867	3475	0.558425	0.588777	0.538861	protein_coding
C2orf88	ENSG00000187699	1.19738	-3.36196	0.000475077	0.0126453	-1	2	189879609	190203484	+	323876	5986	0.374499	0.432008	0.373417	protein_coding
ADGRB1	ENSG00000181790	2.37419	-3.34336	8.71386e-07	0.000191543	-1	8	142449430	142545009	+	95580	7326	0.626675	0.680317	0.622222	protein_coding
KMO	ENSG00000117009	3.02469	-3.33423	3.23202e-05	0.00216222	-1	1	241532134	241595642	+	63509	5930	0.380031	0.387352	0.379277	protein_coding
ZNF554	ENSG00000172006	4.28102	-3.33254	0.000186041	0.00678343	-1	19	2819868	2836735	+	16868	5646	0.507856	0.504428	0.50958	protein_coding
ENSG00000287061	ENSG00000287061	-0.131326	-3.31824	0.000621268	0.0155118	-1	15	90811528	90815544	-	4017	1792	0.466633	0.427455	0.498201	lncRNA
ENSG00000267605	ENSG00000267605	-0.0272159	-3.29406	0.00123453	0.0240758	-1	19	37235507	37304395	-	68889	3461	0.540762	0.535105	0.541061	lncRNA
ST3GAL1.DT	ENSG00000261220	0.236655	-3.28384	0.000322996	0.00953322	-1	8	133573183	133573861	+	679	678	0.466077	0.466077	0	lncRNA
ABCB1	ENSG00000085563	3.36912	-3.27436	0.00193126	0.032548	-1	7	87503017	87713323	-	210307	6389	0.370161	0.402097	0.36916	protein_coding
ENSG00000262587	ENSG00000262587	-0.00301173	-3.22227	0.000138383	0.00557423	-1	16	25031744	25058109	+	26366	1124	0.449118	0.535587	0.445268	transcribed_unprocessed_pseudogene
SLC25A35	ENSG00000125434	4.05256	-3.21081	6.42723e-05	0.00339607	-1	17	8287763	8295400	-	7638	3945	0.554406	0.577693	0.529523	protein_coding
MAGEA11	ENSG00000185247	2.07864	-3.20686	0.00301604	0.0432505	-1	X	149688228	149717268	+	29041	3460	0.433678	0.523121	0.421579	protein_coding
PNMT	ENSG00000141744	2.76917	-3.20118	0.00011464	0.00495924	-1	17	39667981	39670475	+	2495	1159	0.614675	0.64711	0.586517	protein_coding
MUC20	ENSG00000176945	2.05271	-3.1949	0.000154959	0.00597582	-1	3	195720884	195741123	+	20240	6829	0.506201	0.525406	0.496421	protein_coding
ADORA1	ENSG00000163485	2.93319	-3.19119	9.17835e-10	1.17689e-06	-1	1	203090654	203167405	+	76752	4182	0.481427	0.598757	0.474665	protein_coding
ENSG00000285799	ENSG00000285799	-0.183451	-3.18488	0.00318512	0.0448472	-1	6	29849550	29885615	-	36066	3401	0.441897	0.478683	0.438066	transcribed_unprocessed_pseudogene
ENSG00000284633	ENSG00000284633	0.119029	-3.18116	0.00204424	0.0340051	-1	22	39242188	39279897	+	37710	4516	0.558169	0.533437	0.561534	lncRNA
RAB6B	ENSG00000154917	1.80879	-3.16191	0.000267683	0.00850633	-1	3	133824235	133895882	-	71648	6045	0.496071	0.516129	0.494223	protein_coding
C1QTNF1.AS1	ENSG00000265096	1.0658	-3.13677	0.00264375	0.0398037	-1	17	79018131	79027673	-	9543	2059	0.522322	0.463332	0.538554	lncRNA
GPR20	ENSG00000204882	0.0638715	-3.1104	0.000319007	0.00945772	-1	8	141356470	141367286	-	10817	1562	0.616956	0.637004	0.613573	protein_coding
BMP1	ENSG00000168487	8.09293	-3.10869	0.000894234	0.0194523	-1	8	22165140	22212326	+	47187	7043	0.538316	0.60727	0.526219	protein_coding
MIR656	ENSG00000207959	0.1889	-3.09963	5.65392e-05	0.00307409	-1	14	101066724	101066801	+	78	77	0.363636	0.363636	0	miRNA
LINC01089	ENSG00000212694	3.25463	-3.0928	2.54146e-07	7.52028e-05	-1	12	121795267	121803906	-	8640	4123	0.58942	0.556391	0.619575	lncRNA
TPPP3	ENSG00000159713	5.87826	-3.0916	0.000344915	0.00997595	-1	16	67389809	67393518	-	3710	2598	0.612564	0.611239	0.615662	protein_coding
RASA4DP	ENSG00000233297	0.378968	-3.06199	2.29234e-05	0.00173754	-1	7	102681836	102690469	-	8634	1190	0.57952	0.652941	0.567782	unprocessed_pseudogene
GLDN	ENSG00000186417	4.70745	-3.06109	0.00083113	0.0185216	-1	15	51341655	51408005	+	66351	7099	0.447536	0.472884	0.444499	protein_coding
ENSG00000279168	ENSG00000279168	0.365214	-3.03983	0.000518335	0.013564	-1	7	102579104	102679295	-	100192	1238	0.538052	0.472536	0.538872	lncRNA
PLVAP	ENSG00000130300	4.86272	-3.02083	1.64899e-07	5.28603e-05	-1	19	17351450	17377342	-	25893	2289	0.517071	0.601573	0.508876	protein_coding
UCK2	ENSG00000143179	4.47038	-3.01326	0.00185826	0.0315945	-1	1	165827614	165911618	+	84005	6972	0.441955	0.497562	0.436922	protein_coding
TPRG1LP1	ENSG00000269097	1.96968	-3.01241	0.00228357	0.0364873	-1	19	57664280	57665039	+	760	759	0.620553	0.620553	0	processed_pseudogene
PART1	ENSG00000152931	0.293571	-3.011	5.87305e-05	0.00315974	-1	5	60487713	60548813	+	61101	12695	0.399656	0.425207	0.392955	lncRNA
PLAC1	ENSG00000170965	4.50424	-3.00065	0.000983285	0.0206128	-1	X	134565838	134764322	-	198485	1899	0.420664	0.439705	0.42048	protein_coding
MC1R	ENSG00000258839	3.8511	-2.99293	0.000327032	0.00961718	-1	16	89912119	89920973	+	8855	4755	0.581771	0.6	0.560625	protein_coding
MATN3	ENSG00000132031	2.25888	-2.98525	2.68068e-05	0.00192746	-1	2	19992052	20012668	-	20617	3143	0.425058	0.440025	0.422366	protein_coding
GDPD5	ENSG00000158555	6.74884	-2.97372	0.00065744	0.0159811	-1	11	75434640	75525941	-	91302	9874	0.534244	0.595402	0.526828	protein_coding
ABHD17C	ENSG00000136379	2.85581	-2.95761	0.00233211	0.0369856	-1	15	80679684	80755621	+	75938	3613	0.42954	0.48713	0.426663	protein_coding
SCN4B	ENSG00000177098	1.23403	-2.91669	0.00265294	0.0398269	-1	11	118133377	118152888	-	19512	5643	0.526472	0.556973	0.514061	protein_coding
KL	ENSG00000133116	4.02907	-2.91302	3.27828e-05	0.00216493	-1	13	33016423	33066143	+	49721	5059	0.404344	0.455426	0.398558	protein_coding
CPZ	ENSG00000109625	3.64374	-2.90846	0.000569526	0.014557	-1	4	8592660	8619759	+	27100	3435	0.582863	0.619796	0.577502	protein_coding
ENSG00000232310	ENSG00000232310	-0.0176562	-2.9081	0.00263134	0.0397398	-1	6	134520163	134689399	-	169237	4531	0.395625	0.455308	0.393983	lncRNA
ARRDC3.AS1	ENSG00000281357	0.406695	-2.88818	0.00170866	0.0299444	-1	5	91380349	91612566	+	232218	7575	0.372621	0.382574	0.372286	lncRNA
NECTIN3	ENSG00000177707	5.4828	-2.88565	0.00186495	0.0316733	-1	3	111070071	111275563	+	205493	7700	0.366725	0.393506	0.365682	protein_coding
C2orf72	ENSG00000204128	4.96446	-2.88272	0.000683317	0.0163509	-1	2	231037523	231049719	+	12197	3815	0.487537	0.564351	0.452571	protein_coding
RASA4	ENSG00000105808	2.19692	-2.87631	1.04445e-05	0.00101715	-1	7	102573807	102616756	-	42950	8053	0.555985	0.595182	0.546939	protein_coding
BPGM	ENSG00000172331	5.78861	-2.87147	0.000684671	0.0163509	-1	7	134646811	134679816	+	33006	2533	0.396546	0.450059	0.392098	protein_coding
ELF3.AS1	ENSG00000234678	1.53061	-2.86864	0.00359044	0.0482078	-1	1	201995696	202010463	-	14768	5566	0.500914	0.496946	0.503315	lncRNA
TMEM100	ENSG00000166292	4.04024	-2.86568	8.80765e-05	0.00418282	-1	17	55719627	55732121	-	12495	2900	0.401873	0.42	0.396394	protein_coding
CARMN	ENSG00000249669	4.85179	-2.85144	1.24292e-08	9.77341e-06	-1	5	149406689	149432835	+	26147	17997	0.519659	0.522809	0.512701	lncRNA
FAM156B	ENSG00000179304	1.70884	-2.83164	3.59781e-05	0.0023163	-1	X	52891306	52908560	+	17255	4451	0.487365	0.540328	0.468953	protein_coding
ENSG00000267943	ENSG00000267943	4.18641	-2.83071	1.94379e-06	0.000334712	-1	19	53007512	53013180	+	5669	4058	0.493472	0.489157	0.504348	lncRNA
GPER1	ENSG00000164850	1.67286	-2.82678	0.000436403	0.011927	-1	7	1082208	1093815	+	11608	3119	0.558887	0.611735	0.539467	protein_coding
HES4	ENSG00000188290	2.58684	-2.81886	3.24228e-10	5.54321e-07	-1	1	998962	1000172	-	1211	1116	0.743802	0.738351	0.808511	protein_coding
PRKCZ	ENSG00000067606	6.62084	-2.81423	0.000126477	0.00523145	-1	1	2050411	2185395	+	134985	7659	0.564534	0.594595	0.562725	protein_coding
DNAAF1	ENSG00000154099	0.189605	-2.8086	0.00356492	0.0480328	-1	16	84145287	84178767	+	33481	7770	0.473477	0.521879	0.458849	protein_coding
ARTN	ENSG00000117407	1.5064	-2.80672	3.30056e-05	0.00217033	-1	1	43933320	43937240	+	3921	2652	0.637755	0.656109	0.599369	protein_coding
ETV4	ENSG00000175832	2.1674	-2.80644	0.000757564	0.0173523	-1	17	43527844	43579620	-	51777	3500	0.502318	0.599143	0.495298	protein_coding
NPB	ENSG00000183979	0.054414	-2.79675	0.00332038	0.0458623	-1	17	81900745	81902905	+	2161	2160	0.656481	0.656481	0	protein_coding
STX1B	ENSG00000099365	1.11631	-2.78999	0.00174136	0.0302761	-1	16	30989256	31010638	-	21383	5196	0.5521	0.583526	0.542012	protein_coding
GRIP2	ENSG00000144596	4.40038	-2.78878	3.83881e-08	1.84587e-05	-1	3	14489107	14556075	-	66969	11866	0.523459	0.573487	0.512686	protein_coding
HS3ST3B1	ENSG00000125430	3.76296	-2.78563	0.00182944	0.0314315	-1	17	14301081	14349404	+	48324	5367	0.459947	0.495249	0.455536	protein_coding
TMEM229B	ENSG00000198133	2.68575	-2.77694	0.000212867	0.00737827	-1	14	67447084	67533739	-	86656	6350	0.485338	0.554646	0.479858	protein_coding
ZNF117	ENSG00000152926	5.94161	-2.77479	3.58267e-05	0.00231624	-1	7	64971772	65006684	-	34913	10690	0.391355	0.333209	0.417018	protein_coding
CBR3.AS1	ENSG00000236830	3.4178	-2.77399	0.00183882	0.0314946	-1	21	36131767	36175815	-	44049	8885	0.479023	0.487676	0.476836	lncRNA
ERVV.2	ENSG00000268964	3.94835	-2.75104	0.000146829	0.00577817	-1	19	53044740	53051680	+	6941	3031	0.484726	0.466183	0.499105	protein_coding
ENSG00000232295	ENSG00000232295	0.872195	-2.73213	1.95776e-06	0.000334712	-1	6	71221457	71328228	-	106772	5145	0.384571	0.427211	0.382412	lncRNA
OSMR.AS1	ENSG00000249740	0.789837	-2.71128	5.06501e-05	0.00286527	-1	5	38682581	38845829	-	163249	4849	0.413291	0.438853	0.412509	lncRNA
SRCIN1	ENSG00000277363	2.28031	-2.69397	0.000998582	0.0208766	-1	17	38530031	38605952	-	75922	11638	0.566734	0.621155	0.556881	protein_coding
SPIRE2	ENSG00000204991	5.92077	-2.69173	0.00122264	0.0239349	-1	16	89818179	89871319	+	53141	7980	0.547911	0.579449	0.542338	protein_coding
MIR145	ENSG00000276365	0.301069	-2.65566	0.000578536	0.0146413	-1	5	149430646	149430733	+	88	87	0.471264	0.471264	0	miRNA
DNAH2	ENSG00000183914	2.24315	-2.64665	2.64193e-05	0.00190851	-1	17	7717354	7833744	+	116391	17145	0.48426	0.539341	0.474744	protein_coding
ZNF503.AS1	ENSG00000226051	0.891876	-2.63538	4.40797e-06	0.000565212	-1	10	75243568	75373500	+	129933	5256	0.452783	0.501712	0.45072	lncRNA
LINC01004	ENSG00000228393	1.744	-2.62471	1.32455e-07	4.73973e-05	-1	7	104950315	105013044	-	62730	1479	0.420013	0.363759	0.421371	lncRNA
CHCHD10	ENSG00000250479	3.81712	-2.61856	1.53178e-06	0.000290981	-1	22	23765834	23767972	-	2139	885	0.627222	0.650847	0.610535	protein_coding
HSD17B1	ENSG00000108786	8.18254	-2.6164	0.000544824	0.0140312	-1	17	42552922	42555214	+	2293	1947	0.647906	0.640986	0.686957	protein_coding
ENSG00000278959	ENSG00000278959	0.511745	-2.61549	0.000270179	0.00850633	-1	7	93954044	93956519	-	2476	2475	0.365253	0.365253	0	TEC
LDB3	ENSG00000122367	2.37312	-2.61346	0.00258973	0.0396024	-1	10	86668507	86736072	+	67566	6605	0.529993	0.524905	0.530545	protein_coding
NPAS2	ENSG00000170485	3.79986	-2.59967	0.000531965	0.0138033	-1	2	100820139	100996829	+	176691	12480	0.458362	0.489022	0.456032	protein_coding
NAGS	ENSG00000161653	0.426476	-2.59669	0.00234306	0.0370595	-1	17	44004622	44009068	+	4447	2745	0.634503	0.636066	0.631981	protein_coding
TCF15	ENSG00000125878	1.13471	-2.59339	4.36421e-05	0.00265423	-1	20	604257	610309	-	6053	1004	0.567581	0.694223	0.542393	protein_coding
ENSG00000261655	ENSG00000261655	0.683952	-2.58923	0.00183387	0.0314579	-1	8	141353403	141355365	-	1963	1962	0.603976	0.603976	0	lncRNA
EBF3	ENSG00000108001	1.57357	-2.57635	0.00149107	0.0270556	-1	10	129835233	129973053	-	137821	7576	0.496009	0.477825	0.497067	protein_coding
CETP	ENSG00000087237	2.63303	-2.57427	0.00088837	0.0193617	-1	16	56961923	56983845	+	21923	3374	0.507618	0.542976	0.501186	protein_coding
LINC02245	ENSG00000237638	0.886258	-2.56508	0.00024319	0.00804722	-1	2	64901840	65056168	-	154329	6147	0.45078	0.475354	0.449761	lncRNA
ENSG00000256694	ENSG00000256694	1.46481	-2.55356	0.0012418	0.0241258	-1	12	164664	166321	-	1658	1099	0.535908	0.572338	0.464158	lncRNA
ENSG00000253671	ENSG00000253671	0.449573	-2.55353	0.00133873	0.0254623	-1	8	17808361	17822183	+	13823	4163	0.369194	0.394187	0.358422	lncRNA
CRYBG2	ENSG00000176092	5.87898	-2.52337	0.00379144	0.0498197	-1	1	26321698	26360080	-	38383	6870	0.526158	0.618632	0.505998	protein_coding
TMEM54	ENSG00000121900	4.03541	-2.52303	0.00335653	0.0461959	-1	1	32894594	32901438	-	6845	1410	0.573203	0.633333	0.5576	protein_coding
FLT4	ENSG00000037280	6.4353	-2.52265	0.00357799	0.048127	-1	5	180601506	180649624	-	48119	8826	0.602394	0.624632	0.597399	protein_coding
TAFA2	ENSG00000198673	0.431085	-2.50927	0.000689812	0.0164052	-1	12	61708273	62279150	-	570878	9146	0.367981	0.421605	0.367108	protein_coding
PLEKHA6	ENSG00000143850	6.69806	-2.50739	0.00293825	0.042535	-1	1	204218853	204377665	-	158813	9623	0.489144	0.557103	0.484761	protein_coding
SMAD6	ENSG00000137834	5.23688	-2.50062	1.33386e-08	9.77341e-06	-1	15	66702236	66782849	+	80614	8551	0.508255	0.565899	0.501415	protein_coding
EPS8L1	ENSG00000131037	7.93697	-2.49325	0.000441633	0.012006	-1	19	55072020	55087923	+	15904	5321	0.582594	0.63879	0.554338	protein_coding
ENSG00000230825	ENSG00000230825	3.40432	-2.49219	0.00296705	0.0428274	-1	7	7255154	7278071	+	22918	3246	0.404023	0.427603	0.400132	lncRNA
RASA4B	ENSG00000170667	2.75437	-2.4835	0.000636364	0.0156919	-1	7	102479976	102517777	-	37802	7283	0.563398	0.580393	0.559342	protein_coding
ABCG2	ENSG00000118777	4.1184	-2.48126	0.000130173	0.00536988	-1	4	88090150	88231628	-	141479	5583	0.413838	0.424503	0.4134	protein_coding
ERVV.1	ENSG00000269526	4.59648	-2.47253	7.52368e-05	0.0037465	-1	19	53013921	53016122	+	2202	2201	0.470241	0.470241	0	protein_coding
IL33	ENSG00000137033	3.60475	-2.45803	1.71255e-05	0.001453	-1	9	6215786	6257983	+	42198	3244	0.377468	0.343095	0.38033	protein_coding
CPS1	ENSG00000021826	2.24179	-2.44986	5.65445e-06	0.000690516	-1	2	210477682	210679107	+	201426	10972	0.363093	0.416606	0.36001	protein_coding
CTDSP1	ENSG00000144579	7.97039	-2.44189	2.26019e-05	0.00173217	-1	2	218398256	218405941	+	7686	4600	0.63188	0.622391	0.646029	protein_coding
FCN3	ENSG00000142748	1.05528	-2.44174	3.83091e-05	0.00240597	-1	1	27369110	27374824	-	5715	2164	0.544452	0.57902	0.52338	protein_coding
DDX11L2	ENSG00000236397	0.253548	-2.43943	0.000760478	0.0173612	-1	2	113599036	113601261	-	2226	1394	0.581573	0.56241	0.613718	unprocessed_pseudogene
ITGB3	ENSG00000259207	3.05876	-2.43772	0.00105654	0.021676	-1	17	47253827	47313743	+	59917	6325	0.465335	0.491542	0.462242	protein_coding
ENSG00000273729	ENSG00000273729	1.19619	-2.43561	1.07517e-05	0.00103062	-1	14	77028086	77031572	+	3487	3486	0.527826	0.527826	0	lncRNA
LINC02175	ENSG00000262155	1.84746	-2.41492	0.00205908	0.0341491	-1	16	25066937	25088618	+	21682	5667	0.442784	0.472031	0.432434	lncRNA
ENTPD1	ENSG00000138185	4.48058	-2.41162	0.000177469	0.00659595	-1	10	95711779	95877266	+	165488	14331	0.408558	0.416021	0.40785	protein_coding
STRA6	ENSG00000137868	6.53403	-2.4104	0.00230472	0.0367145	-1	15	74179466	74212267	-	32802	7647	0.552148	0.573558	0.545639	protein_coding
ENSG00000277152	ENSG00000277152	1.00382	-2.40365	0.000269047	0.00850633	-1	15	66860303	66867023	+	6721	6720	0.504464	0.504464	0	lncRNA
PGF	ENSG00000119630	7.20902	-2.39927	0.00277627	0.0408008	-1	14	74941834	74955626	-	13793	5798	0.558875	0.576751	0.545909	protein_coding
CNTNAP3B	ENSG00000154529	2.23695	-2.39173	0.000338129	0.00981659	-1	9	41890314	42129510	-	239197	13194	0.382536	0.41534	0.380621	protein_coding
ENSG00000275202	ENSG00000275202	1.49454	-2.38386	0.00301392	0.0432505	-1	13	48974967	48976867	-	1901	1099	0.617895	0.55141	0.709114	lncRNA
RPL13P12	ENSG00000215030	3.19562	-2.38162	0.00379547	0.0498301	-1	17	17383377	17384012	-	636	635	0.614173	0.614173	0	processed_pseudogene
LINC00893	ENSG00000241769	0.941898	-2.37726	0.000944156	0.0200844	-1	X	149527591	149540959	-	13369	3590	0.520796	0.513092	0.523624	lncRNA
MHENCR	ENSG00000232442	2.27542	-2.37495	1.4034e-07	4.80891e-05	-1	20	63627227	63628824	+	1598	799	0.623043	0.559449	0.686717	lncRNA
ATP6V0D1.DT	ENSG00000270049	1.62631	-2.37313	7.21173e-05	0.00365023	-1	16	67481314	67505977	+	24664	4823	0.498763	0.491395	0.500554	lncRNA
CCNY.AS1	ENSG00000271335	0.390938	-2.36849	0.000618219	0.0154899	-1	10	35314552	35336401	-	21850	1421	0.423818	0.496833	0.418739	lncRNA
ENSG00000256540	ENSG00000256540	0.962183	-2.36396	0.00148878	0.0270459	-1	12	166856	182399	-	15544	1182	0.5755	0.551607	0.577467	lncRNA
DUSP4	ENSG00000120875	4.94838	-2.3544	0.00156524	0.0280703	-1	8	29333064	29350684	-	17621	7267	0.511067	0.524288	0.501787	protein_coding
ZKSCAN2.DT	ENSG00000274925	1.5495	-2.34231	6.79574e-05	0.00348554	-1	16	25257952	25261066	+	3115	3114	0.487155	0.487155	0	lncRNA
MAFK	ENSG00000198517	8.01322	-2.33692	0.00023225	0.00784162	-1	7	1530702	1543043	+	12342	4465	0.634065	0.643673	0.628619	protein_coding
RIPOR2	ENSG00000111913	4.27031	-2.33557	0.00265564	0.0398269	-1	6	24804282	25042170	-	237889	9402	0.417226	0.456711	0.415601	protein_coding
NRN1	ENSG00000124785	3.91407	-2.33493	1.40639e-07	4.80891e-05	-1	6	5997999	6007605	-	9607	2279	0.527483	0.515138	0.531323	protein_coding
LINC02082	ENSG00000242268	0.660032	-2.29868	0.00108765	0.0221651	-1	3	168902194	168924590	+	22397	2745	0.350241	0.406922	0.342324	lncRNA
LINC01341	ENSG00000227953	2.07762	-2.28932	1.26303e-06	0.000260843	-1	1	246775880	246792385	+	16506	4764	0.523054	0.542821	0.515033	lncRNA
SELP	ENSG00000174175	1.43056	-2.28682	8.20539e-05	0.00398181	-1	1	169588849	169630193	-	41345	3473	0.404823	0.48258	0.397692	protein_coding
FRZB	ENSG00000162998	5.7138	-2.28658	0.00275752	0.0406791	-1	2	182833275	182866637	-	33363	2631	0.365536	0.440517	0.359116	protein_coding
ACVRL1	ENSG00000139567	6.91041	-2.27834	4.3677e-07	0.000110173	-1	12	51906908	51923361	+	16454	4950	0.548411	0.586061	0.532209	protein_coding
CCDC3	ENSG00000151468	4.1857	-2.26371	0.000119425	0.00503274	-1	10	12896625	13099652	-	203028	3691	0.437311	0.543484	0.435345	protein_coding
COMTD1	ENSG00000165644	3.01291	-2.25807	8.2902e-05	0.00399878	-1	10	75233641	75236030	-	2390	1904	0.691921	0.678571	0.74433	protein_coding
CCND1	ENSG00000110092	6.86544	-2.25249	7.14169e-12	2.74723e-08	-1	11	69641156	69654474	+	13319	4756	0.586349	0.524601	0.620649	protein_coding
ENSG00000259605	ENSG00000259605	1.43116	-2.24862	3.64273e-08	1.80809e-05	-1	19	45764785	45769806	+	5022	2598	0.678351	0.67244	0.684688	lncRNA
MAPRE3	ENSG00000084764	4.61862	-2.24746	0.000165682	0.00626377	-1	2	26970637	27027219	+	56583	3617	0.458785	0.547415	0.452733	protein_coding
TTLL10.AS1	ENSG00000205231	1.11887	-2.23642	0.000230491	0.00781183	-1	1	1173056	1179555	-	6500	3530	0.610248	0.617847	0.601213	lncRNA
ENSG00000260793	ENSG00000260793	2.35664	-2.23001	1.79635e-07	5.6409e-05	-1	17	44221401	44223710	+	2310	2010	0.540061	0.542786	0.521739	lncRNA
RGS5	ENSG00000143248	3.57305	-2.2232	0.00194135	0.0326465	-1	1	163111121	163321791	-	210671	6611	0.376708	0.370746	0.376901	protein_coding
ENSG00000229167	ENSG00000229167	0.0942913	-2.22175	0.00082912	0.0185216	-1	1	31571585	31577898	-	6314	808	0.55853	0.559406	0.558401	lncRNA
ENSG00000274383	ENSG00000274383	3.94625	-2.22005	0.00377557	0.0497386	-1	15	64950916	64951435	-	520	519	0.420039	0.420039	0	lncRNA
COLCA2	ENSG00000214290	1.0378	-2.21519	0.00107356	0.0219666	-1	11	111298555	111308735	+	10181	2051	0.452259	0.587518	0.418133	protein_coding
CCDC183.AS1	ENSG00000228544	1.39156	-2.21359	0.00199489	0.0332561	-1	9	136803927	136808848	-	4922	2381	0.646617	0.618228	0.673228	lncRNA
ERVFRD.1	ENSG00000244476	5.4058	-2.20674	2.96654e-05	0.00204691	-1	6	11102489	11111725	-	9237	3233	0.469684	0.472317	0.468266	protein_coding
DPEP2	ENSG00000167261	3.85321	-2.20629	1.4707e-07	4.91951e-05	-1	16	67987394	68000586	-	13193	3486	0.543663	0.582042	0.529878	protein_coding
ADAMTS3	ENSG00000156140	1.90383	-2.19645	0.000887209	0.0193617	-1	4	72280969	72569221	-	288253	6982	0.357982	0.421656	0.356401	protein_coding
LGI4	ENSG00000153902	2.67564	-2.19039	1.75503e-06	0.000317703	-1	19	35124513	35142451	-	17939	4524	0.557309	0.606985	0.540555	protein_coding
ENSG00000233251	ENSG00000233251	4.40078	-2.18635	4.94622e-05	0.00283983	-1	2	56173534	56185870	-	12337	4364	0.473654	0.449817	0.486703	lncRNA
MTMR4	ENSG00000108389	6.13632	-2.18276	0.00348196	0.0475551	-1	17	58489529	58517905	-	28377	7466	0.478538	0.493303	0.473266	protein_coding
PCYT1B	ENSG00000102230	0.831281	-2.17969	8.22912e-05	0.00398181	-1	X	24558087	24672677	-	114591	5657	0.423789	0.481174	0.420809	protein_coding
PLCXD2	ENSG00000240891	2.53724	-2.17718	0.000726765	0.0169056	-1	3	111674676	111846447	+	171772	8965	0.393704	0.435471	0.391404	protein_coding
MIR149	ENSG00000207611	0.637721	-2.16486	0.00143106	0.026466	-1	2	240456001	240456089	+	89	88	0.715909	0.715909	0	miRNA
SPACA6	ENSG00000182310	4.82081	-2.14934	5.31101e-08	2.40354e-05	-1	19	51689128	51712387	+	23260	4104	0.538028	0.60575	0.523519	protein_coding
ENSG00000189229	ENSG00000189229	1.44484	-2.13149	0.00266933	0.0399154	-1	3	6490460	6736750	+	246291	6357	0.367632	0.399402	0.36679	lncRNA
AFF1	ENSG00000172493	6.98174	-2.12806	0.00156221	0.0280486	-1	4	86935002	87141039	+	206038	10928	0.411844	0.458913	0.409207	protein_coding
SEPTIN4.AS1	ENSG00000264672	0.915264	-2.12093	0.00130862	0.0249514	-1	17	58519837	58557799	+	37963	2472	0.488805	0.472087	0.489969	lncRNA
SMOC1	ENSG00000198732	3.19364	-2.11846	0.00175449	0.0304355	-1	14	69854131	70032366	+	178236	4354	0.454254	0.539274	0.452125	protein_coding
MAOA	ENSG00000189221	5.99947	-2.11524	0.00353506	0.0477509	-1	X	43654907	43746824	+	91918	5512	0.4027	0.478955	0.397836	protein_coding
SPNS2	ENSG00000183018	3.90577	-2.11262	3.41619e-07	9.2219e-05	-1	17	4498881	4539035	+	40155	4056	0.573791	0.645957	0.565682	protein_coding
ENSG00000271533	ENSG00000271533	2.85171	-2.11033	0.000327511	0.00961718	-1	X	74209976	74213660	-	3685	3684	0.320304	0.320304	0	lncRNA
FAM156A	ENSG00000268350	1.78207	-2.10539	9.038e-05	0.00423987	-1	X	52926402	52995472	-	69071	6599	0.4656	0.512502	0.460646	protein_coding
TRIM25	ENSG00000121060	6.36047	-2.10406	0.000609009	0.0152868	-1	17	56836387	56914080	-	77694	12401	0.428906	0.474236	0.420297	protein_coding
NT5E	ENSG00000135318	4.87144	-2.10158	0.00276862	0.0407273	-1	6	85449584	85495791	+	46208	4523	0.430692	0.446606	0.428966	protein_coding
UQCRFS1P1	ENSG00000226085	0.369919	-2.09736	0.00104333	0.0214336	-1	22	39875289	39876108	+	820	819	0.539683	0.539683	0	processed_pseudogene
UCN	ENSG00000163794	1.5405	-2.09593	2.06234e-05	0.00166143	-1	2	27307400	27308445	-	1046	793	0.686124	0.669609	0.738095	protein_coding
LINC01150	ENSG00000229671	1.78083	-2.09224	0.000265007	0.00850633	-1	11	1897015	1908656	+	11642	1294	0.461558	0.468315	0.460713	lncRNA
SPAAR	ENSG00000235387	1.47802	-2.07773	9.60695e-05	0.0044126	-1	9	35909490	35937153	+	27664	2894	0.444384	0.514167	0.436231	protein_coding
SYDE1	ENSG00000105137	6.01002	-2.07429	0.00320844	0.044998	-1	19	15107401	15114985	+	7585	3958	0.602584	0.645275	0.555985	protein_coding
ENSG00000249592	ENSG00000249592	3.10351	-2.07273	6.88559e-07	0.000155807	-1	4	760202	781859	-	21658	4667	0.506995	0.506535	0.507122	lncRNA
TWIST1	ENSG00000122691	4.51529	-2.04688	0.00263673	0.0397398	-1	7	19020991	19117636	-	96646	1991	0.373573	0.534405	0.37019	protein_coding
OR51E1	ENSG00000180785	2.05377	-2.0435	7.86165e-09	7.11572e-06	-1	11	4643420	4655488	+	12069	3610	0.434455	0.433518	0.434855	protein_coding
FURIN	ENSG00000140564	8.1986	-2.04324	0.00168781	0.0296804	-1	15	90868588	90883564	+	14977	4942	0.585003	0.622015	0.566773	protein_coding
NUP50.DT	ENSG00000226328	2.30147	-2.04213	0.000967306	0.0204169	-1	22	45133020	45163781	-	30762	3137	0.414161	0.46095	0.408847	lncRNA
ENSG00000272463	ENSG00000272463	1.3372	-2.03413	0.00223817	0.0361721	-1	6	708592	711405	-	2814	2813	0.394597	0.394597	0	lncRNA
NPY1R	ENSG00000164128	1.15171	-2.0325	0.00190828	0.0322313	-1	4	163323962	163344832	-	20871	3974	0.395161	0.417715	0.389856	protein_coding
ENSG00000280077	ENSG00000280077	1.97729	-2.03125	0.00023488	0.00784409	-1	9	41012231	41014133	+	1903	1902	0.331756	0.331756	0	TEC
USP46.DT	ENSG00000248866	1.76226	-2.02303	0.00165954	0.0292759	-1	4	52659406	52661668	+	2263	1046	0.499116	0.472275	0.522204	lncRNA
ENSG00000245552	ENSG00000245552	2.05973	-2.00536	1.33207e-05	0.00117797	-1	11	95150539	95234391	+	83853	7421	0.371774	0.45762	0.363439	lncRNA
LPL	ENSG00000175445	4.20657	-2.00346	0.000168055	0.00632238	-1	8	19901717	19967259	+	65543	4118	0.40011	0.432006	0.397971	protein_coding
GATA2.AS1	ENSG00000244300	4.17143	-2.00131	4.71063e-05	0.0028094	-1	3	128489212	128502970	+	13759	2902	0.551606	0.555824	0.550479	lncRNA
MMRN2	ENSG00000173269	6.1563	-1.99901	0.00347576	0.0475391	-1	10	86935540	86969481	-	33942	5076	0.550897	0.577423	0.546232	protein_coding
POC1B.AS1	ENSG00000270344	0.684233	-1.99811	0.00136651	0.0257362	-1	12	89524594	89548005	+	23412	8155	0.424971	0.44721	0.413083	lncRNA
NDUFA4L2	ENSG00000185633	5.25432	-1.99773	5.30107e-05	0.00294468	-1	12	57234903	57240715	-	5813	2800	0.620613	0.625357	0.616202	protein_coding
ADAMTS6	ENSG00000049192	5.03042	-1.98699	0.00322498	0.0450993	-1	5	65148738	65481920	-	333183	8536	0.35908	0.416706	0.357565	protein_coding
FDX1	ENSG00000137714	5.55497	-1.98274	0.00122794	0.024008	-1	11	110429948	110464884	+	34937	3140	0.397641	0.414331	0.395993	protein_coding
ENSG00000225177	ENSG00000225177	2.58412	-1.98259	2.08784e-09	2.4712e-06	-1	6	138692548	138697288	+	4741	2636	0.531435	0.443096	0.64211	lncRNA
DBNDD2	ENSG00000244274	1.06124	-1.97722	0.00147269	0.0268486	-1	20	45406057	45410610	+	4554	2477	0.558094	0.603956	0.503372	protein_coding
VANGL2	ENSG00000162738	3.13432	-1.96793	0.000115689	0.00496101	-1	1	160400564	160428670	+	28107	5346	0.516616	0.536102	0.512039	protein_coding
MAN1A2	ENSG00000198162	6.96623	-1.96173	0.00371462	0.0493117	-1	1	117367449	117528872	+	161424	9653	0.353394	0.370973	0.352276	protein_coding
CLMN	ENSG00000165959	4.47929	-1.95485	0.0031989	0.0449511	-1	14	95181940	95319908	-	137969	15687	0.468928	0.467202	0.469149	protein_coding
MUC20.OT1	ENSG00000242086	5.51048	-1.95193	8.74167e-06	0.000915021	-1	3	195658062	195739964	+	81903	17555	0.483322	0.489718	0.481576	lncRNA
RECQL5	ENSG00000108469	5.60266	-1.95124	0.00123052	0.0240279	-1	17	75626845	75667189	-	40345	8744	0.531777	0.566674	0.52212	protein_coding
FENDRR	ENSG00000268388	2.97692	-1.95036	0.000641095	0.0157038	-1	16	86474529	86509099	-	34571	6874	0.517038	0.48167	0.525816	lncRNA
FOXS1	ENSG00000179772	1.31125	-1.94739	2.37532e-05	0.00177422	-1	20	31844303	31845604	-	1302	1301	0.641814	0.641814	0	protein_coding
EVA1B	ENSG00000142694	5.51505	-1.94732	0.00012304	0.00511681	-1	1	36322030	36324154	-	2125	1238	0.701977	0.680129	0.732506	protein_coding
KCNC4	ENSG00000116396	3.99108	-1.94221	2.10736e-06	0.000347861	-1	1	110210314	110283100	+	72787	26065	0.49886	0.529062	0.48201	protein_coding
DNAJC3.DT	ENSG00000247400	1.51438	-1.93678	0.000475834	0.0126453	-1	13	95648733	95676955	-	28223	3587	0.38959	0.428492	0.383925	lncRNA
PRX	ENSG00000105227	4.10758	-1.93414	3.61791e-11	9.27813e-08	-1	19	40393766	40414793	-	21028	7388	0.55833	0.614645	0.527825	protein_coding
NMUR1	ENSG00000171596	0.475129	-1.92264	0.00223306	0.0361685	-1	2	231523187	231530445	-	7259	3218	0.557867	0.563083	0.553713	protein_coding
PPP1R14A	ENSG00000167641	3.97588	-1.9064	0.00198281	0.0330905	-1	19	38251237	38256532	-	5296	1438	0.582814	0.656467	0.555354	protein_coding
ZNF292	ENSG00000188994	6.1985	-1.8959	0.000838164	0.0186101	-1	6	87152833	87265943	+	113111	14846	0.376766	0.376734	0.376771	protein_coding
ISM1	ENSG00000101230	5.08918	-1.89124	0.00118118	0.0234212	-1	20	13221274	13300651	+	79378	3084	0.442042	0.549935	0.437681	protein_coding
CHRM2	ENSG00000181072	0.521211	-1.89023	0.00283684	0.0413749	-1	7	136868652	137020255	+	151604	8332	0.371596	0.448032	0.36715	protein_coding
TMEM204	ENSG00000131634	3.84494	-1.8902	0.00276065	0.0406791	-1	16	1528688	1555580	+	26893	1950	0.580433	0.629231	0.576618	protein_coding
THOP1	ENSG00000172009	5.91201	-1.88878	0.000913526	0.0196631	-1	19	2785503	2815807	+	30305	7405	0.590747	0.630655	0.577842	protein_coding
NEAT1	ENSG00000245532	10.2526	-1.88208	0.00119158	0.0235666	-1	11	65422774	65445540	+	22767	22766	0.440613	0.440613	0	lncRNA
IRF1.AS1	ENSG00000197536	2.20287	-1.87885	0.000138749	0.00557423	-1	5	132410636	132488702	+	78067	9720	0.47839	0.518107	0.472742	lncRNA
ENSG00000279672	ENSG00000279672	1.95903	-1.87555	0.00232784	0.0369856	-1	11	779617	780755	+	1139	1138	0.621265	0.621265	0	TEC
NDUFA11	ENSG00000174886	2.62096	-1.87136	3.77081e-05	0.00237886	-1	19	5891276	5904006	-	12731	4833	0.590495	0.623422	0.570343	protein_coding
SNHG10	ENSG00000247092	1.89225	-1.85442	3.36718e-05	0.00219537	-1	14	95521943	95534889	-	12947	5435	0.445466	0.45759	0.436693	lncRNA
CEBPB	ENSG00000172216	7.43044	-1.85419	0.000235012	0.00784409	-1	20	50190830	50192668	+	1839	1838	0.662677	0.662677	0	protein_coding
GPR68	ENSG00000119714	2.92244	-1.84942	6.08521e-06	0.000710971	-1	14	91232532	91253925	-	21394	3470	0.519048	0.603458	0.502706	protein_coding
LINC02062	ENSG00000248489	0.801438	-1.84533	0.00153038	0.0276231	-1	5	98929171	98995013	+	65843	2371	0.398074	0.398144	0.398072	lncRNA
ZNF436.AS1	ENSG00000249087	1.73406	-1.84019	0.00318594	0.0448472	-1	1	23368997	23371839	+	2843	2672	0.515482	0.50262	0.717647	lncRNA
ZNF91	ENSG00000167232	5.54357	-1.83891	0.001038	0.0213811	-1	19	23304991	23395471	-	90481	10299	0.405371	0.381202	0.408476	protein_coding
MFSD12	ENSG00000161091	6.15033	-1.83187	0.000394731	0.0110431	-1	19	3538261	3574290	-	36030	5274	0.570762	0.634054	0.559909	protein_coding
RPS10P7	ENSG00000223396	1.58667	-1.80744	0.0012085	0.023779	-1	1	201518703	201584367	+	65665	3015	0.471918	0.466667	0.47217	transcribed_processed_pseudogene
WFDC1	ENSG00000103175	6.01313	-1.80056	0.000136901	0.00554341	-1	16	84294846	84329844	+	34999	8573	0.498343	0.509507	0.494721	protein_coding
ZNF169	ENSG00000175787	1.9765	-1.79074	0.00020696	0.00727054	-1	9	94259298	94301829	+	42532	5669	0.415767	0.466573	0.407954	protein_coding
NHSL2	ENSG00000204131	2.44789	-1.78432	8.84036e-06	0.000919099	-1	X	71910818	72161750	+	250933	17695	0.453306	0.470698	0.451987	protein_coding
LINC01003	ENSG00000261455	2.63518	-1.76213	0.0018401	0.0314946	-1	7	152463786	152465549	+	1764	1763	0.608622	0.608622	0	lncRNA
ZNRD2.AS1	ENSG00000260233	0.75668	-1.75453	0.00364216	0.0486053	-1	11	65568482	65570423	-	1942	1941	0.556929	0.556929	0	lncRNA
ASIC3	ENSG00000213199	2.1648	-1.74951	0.00314248	0.0445275	-1	7	151048292	151052756	+	4465	2740	0.635753	0.631022	0.643271	protein_coding
MEG9	ENSG00000223403	5.54207	-1.73351	3.77229e-05	0.00237886	-1	14	101068283	101072937	+	4655	4654	0.545337	0.545337	0	lncRNA
ENSG00000273328	ENSG00000273328	3.19949	-1.72207	0.001525	0.0275737	-1	3	42809414	42908105	+	98692	3927	0.4431	0.476445	0.441718	lncRNA
STAG3L1	ENSG00000205583	1.69854	-1.72157	0.00084971	0.0186821	-1	7	75359194	75395383	+	36190	2080	0.504103	0.563462	0.500484	transcribed_unprocessed_pseudogene
SYN1	ENSG00000008056	0.898164	-1.7151	0.00371982	0.0493117	-1	X	47571901	47619857	-	47957	3719	0.477604	0.590212	0.468138	protein_coding
OTUB2	ENSG00000089723	2.56412	-1.71296	0.00208101	0.0343937	-1	14	94026340	94048930	+	22591	4235	0.527667	0.516175	0.530319	protein_coding
MIR34AHG	ENSG00000228526	2.76001	-1.7057	0.000758502	0.0173523	-1	1	9148011	9198906	-	50896	8698	0.510915	0.527363	0.507524	lncRNA
EGLN2	ENSG00000269858	3.8795	-1.70161	2.65907e-06	0.000411359	-1	19	40798996	40808434	+	9439	6569	0.591439	0.590805	0.59289	protein_coding
GNA14	ENSG00000156049	2.97332	-1.69939	0.00304026	0.0434359	-1	9	77423079	77648322	-	225244	2729	0.422064	0.477098	0.421389	protein_coding
ENSG00000259972	ENSG00000259972	3.39465	-1.68897	3.28104e-08	1.7613e-05	-1	16	74305127	74335346	-	30220	4379	0.477316	0.443252	0.483088	lncRNA
CEACAM1	ENSG00000079385	4.53742	-1.6716	0.000149258	0.00585876	-1	19	42507304	42561234	-	53931	5512	0.47519	0.484761	0.474101	protein_coding
BGN	ENSG00000182492	8.38461	-1.67005	0.000845286	0.0186821	-1	X	153494980	153509546	+	14567	2396	0.626184	0.609766	0.629417	protein_coding
WASH3P	ENSG00000185596	4.66496	-1.65848	0.000212904	0.00737827	-1	15	101961603	101976543	+	14941	2337	0.540361	0.591784	0.530826	transcribed_unprocessed_pseudogene
FAM131A	ENSG00000175182	4.46602	-1.65796	0.000118674	0.00503274	-1	3	184335926	184348421	+	12496	8920	0.556703	0.556951	0.556084	protein_coding
TBX2	ENSG00000121068	7.36174	-1.65788	0.000269024	0.00850633	-1	17	61399843	61409466	+	9624	6077	0.612803	0.622511	0.596165	protein_coding
ZNF580	ENSG00000213015	3.80417	-1.65079	6.17299e-11	1.35691e-07	-1	19	55635016	55643470	+	8455	2601	0.574403	0.622068	0.553221	protein_coding
ENSG00000251136	ENSG00000251136	3.74876	-1.64693	0.00144693	0.0266127	-1	8	89585872	89757812	-	171941	14386	0.382133	0.401223	0.38039	lncRNA
LENG8.AS1	ENSG00000226696	2.34681	-1.63545	6.48079e-06	0.000733235	-1	19	54444807	54449045	-	4239	1657	0.481359	0.541943	0.442464	lncRNA
MIRLET7BHG	ENSG00000197182	4.47458	-1.63397	0.000244924	0.00808402	-1	22	46053869	46113928	+	60060	5719	0.568225	0.636125	0.561078	lncRNA
CCDC194	ENSG00000269720	2.19489	-1.61893	0.000108362	0.00479129	-1	19	17390509	17394158	-	3650	1460	0.576048	0.623973	0.544084	protein_coding
MFSD13A	ENSG00000138111	2.74547	-1.60959	0.00012039	0.00503382	-1	10	102461395	102477045	+	15651	3513	0.534569	0.570168	0.524265	protein_coding
ENSG00000275266	ENSG00000275266	4.95227	-1.60692	0.00011052	0.00485876	-1	11	1996540	1996610	+	71	70	0.771429	0.771429	0	misc_RNA
MIR503HG	ENSG00000223749	7.1695	-1.60414	1.57594e-05	0.0013623	-1	X	134543119	134546642	-	3524	3000	0.526256	0.504	0.65392	lncRNA
SCARB1	ENSG00000073060	7.79198	-1.60378	0.00359445	0.0482195	-1	12	124776856	124882668	-	105813	14870	0.514535	0.527438	0.512426	protein_coding
KCNQ4	ENSG00000117013	1.6572	-1.6022	0.000896322	0.0194523	-1	1	40783787	40840452	+	56666	4392	0.55514	0.634335	0.548486	protein_coding
ENSG00000273253	ENSG00000273253	1.44055	-1.59889	0.000232899	0.00784162	-1	22	50199090	50200837	-	1748	999	0.655982	0.67968	0.624332	lncRNA
KDM7A.DT	ENSG00000260231	2.80025	-1.59695	0.000257168	0.00841925	-1	7	140177184	140179640	+	2457	2456	0.504479	0.504479	0	lncRNA
PIK3C2B	ENSG00000133056	6.20812	-1.59334	0.00155146	0.0279208	-1	1	204422628	204494805	-	72178	10133	0.4938	0.544557	0.48551	protein_coding
ARRDC1.AS1	ENSG00000203993	3.62393	-1.5828	0.00100378	0.0209283	-1	9	137615332	137618906	-	3575	3543	0.567991	0.571832	0.129032	lncRNA
TRAPPC14	ENSG00000146826	4.82479	-1.57964	0.00234347	0.0370595	-1	7	100154420	100158723	-	4304	3254	0.604927	0.619238	0.560534	protein_coding
THUMPD3.AS1	ENSG00000206573	3.87433	-1.5781	0.00351107	0.0477251	-1	3	9349689	9398579	-	48891	9523	0.416997	0.40817	0.419133	lncRNA
ENSG00000238058	ENSG00000238058	0.858778	-1.57755	0.00281973	0.0412818	-1	9	135907812	135916126	+	8315	835	0.493986	0.473054	0.496323	lncRNA
PAQR6	ENSG00000160781	2.11444	-1.57744	0.002064	0.0341491	-1	1	156243320	156248117	-	4798	2522	0.609548	0.612213	0.606593	protein_coding
HS3ST3A1	ENSG00000153976	2.28693	-1.57525	0.000905641	0.0195993	-1	17	13494032	13601929	-	107898	4284	0.40838	0.502334	0.404496	protein_coding
PLA2G5	ENSG00000127472	4.80495	-1.57418	0.00303315	0.0434149	-1	1	20028179	20091911	+	63733	3327	0.445632	0.494439	0.442943	protein_coding
RAPGEF4	ENSG00000091428	1.3184	-1.57283	0.00328861	0.0455386	-1	2	172735274	173052893	+	317620	7088	0.405561	0.431433	0.404971	protein_coding
TMEM161B.AS1	ENSG00000247828	2.86623	-1.56811	0.00129713	0.0247813	-1	5	88268891	88439337	+	170447	35159	0.372881	0.370005	0.373628	lncRNA
CGNL1	ENSG00000128849	6.49306	-1.56299	0.000732289	0.016944	-1	15	57375967	57550717	+	174751	8625	0.43814	0.506667	0.434582	protein_coding
ZDHHC1	ENSG00000159714	3.74892	-1.55557	0.00261031	0.0397398	-1	16	67394152	67416833	-	22682	3517	0.555222	0.634347	0.540701	protein_coding
LINC00472	ENSG00000233237	4.62163	-1.53992	2.41636e-07	7.29029e-05	-1	6	71343427	71420745	-	77319	19864	0.371324	0.374043	0.370383	lncRNA
ENSG00000265982	ENSG00000265982	1.81717	-1.53632	0.00158288	0.0282461	-1	17	64778842	64778937	-	96	95	0.726316	0.726316	0	unprocessed_pseudogene
MIR29B2CHG	ENSG00000203709	4.23087	-1.52976	9.50425e-06	0.000949623	-1	1	207801518	207879115	-	77598	16733	0.476591	0.494472	0.471675	lncRNA
LIPE	ENSG00000079435	2.3656	-1.52443	6.46126e-05	0.00339607	-1	19	42401514	42427388	-	25875	5147	0.549664	0.612007	0.534182	protein_coding
AFF3	ENSG00000144218	3.62582	-1.50506	0.00145525	0.026657	-1	2	99545419	100192428	-	647010	15662	0.416926	0.471843	0.415564	protein_coding
ENSG00000257354	ENSG00000257354	2.63798	-1.50092	1.23271e-05	0.00113579	-1	12	62602752	62622213	+	19462	8691	0.40481	0.405592	0.404178	lncRNA
GDF7	ENSG00000143869	2.10398	-1.49473	0.00137938	0.0259068	-1	2	20667144	20679243	+	12100	9265	0.545913	0.533189	0.587509	protein_coding
OBSCN	ENSG00000154358	4.63208	-1.47701	0.000457884	0.0123383	-1	1	228208044	228378876	+	170833	39447	0.538775	0.607676	0.518088	protein_coding
SNCG	ENSG00000173267	3.58484	-1.47152	9.91465e-05	0.00451351	-1	10	86958599	86963258	+	4660	1259	0.614295	0.621922	0.611471	protein_coding
PIK3R3	ENSG00000117461	3.36808	-1.46457	0.00171063	0.0299448	-1	1	46040140	46133036	-	92897	7386	0.402665	0.464798	0.397299	protein_coding
PEX10	ENSG00000157911	4.09564	-1.46352	2.90897e-06	0.000418321	-1	1	2403964	2413797	-	9834	3773	0.615275	0.593427	0.628878	protein_coding
PWWP2B	ENSG00000171813	5.11978	-1.45917	0.00320486	0.0449938	-1	10	132397168	132417859	+	20692	2644	0.62259	0.66944	0.615726	protein_coding
RFTN1	ENSG00000131378	5.66644	-1.45861	2.0532e-05	0.00166143	-1	3	16313574	16514026	-	200453	4748	0.434987	0.534962	0.432561	protein_coding
CROCCP3	ENSG00000080947	3.21103	-1.45775	0.000849948	0.0186821	-1	1	16467436	16499257	-	31822	6889	0.512712	0.521121	0.510388	transcribed_unprocessed_pseudogene
RPL32P3	ENSG00000251474	3.61338	-1.45305	6.23758e-05	0.00333256	-1	3	129382922	129399655	-	16734	4497	0.501106	0.50189	0.500817	transcribed_unprocessed_pseudogene
LMO2	ENSG00000135363	5.13342	-1.44882	0.00146034	0.0267097	-1	11	33858576	33892076	-	33501	2889	0.463403	0.573209	0.45304	protein_coding
RAB30.DT	ENSG00000246067	2.57799	-1.44856	8.37034e-05	0.00401229	-1	11	83072052	83107789	+	35738	7185	0.398495	0.410995	0.395349	lncRNA
ENSG00000214135	ENSG00000214135	4.97916	-1.44375	0.000197616	0.00707142	-1	3	197578213	197627906	-	49694	3487	0.458958	0.494695	0.456261	transcribed_unprocessed_pseudogene
NAA10	ENSG00000102030	3.93529	-1.43343	4.75468e-05	0.00281002	-1	X	153929225	153935080	-	5856	4610	0.575406	0.584165	0.542972	protein_coding
CAVIN3	ENSG00000170955	5.02734	-1.43137	0.00301565	0.0432505	-1	11	6318946	6320532	-	1587	1555	0.64691	0.648232	0.580645	protein_coding
LINC00648	ENSG00000259129	1.83246	-1.42927	0.00193698	0.0326086	-1	14	47764954	47795302	-	30349	3249	0.35485	0.414589	0.347688	lncRNA
STAG3L5P	ENSG00000242294	3.43586	-1.42793	0.000166793	0.00629031	-1	7	100336079	100351900	+	15822	2794	0.472853	0.52577	0.461503	transcribed_unprocessed_pseudogene
DNASE1L2	ENSG00000167968	1.63105	-1.42293	0.00314949	0.0445416	-1	16	2235816	2238711	+	2896	2188	0.686356	0.664077	0.755304	protein_coding
ENSG00000278600	ENSG00000278600	1.71917	-1.42148	0.00161933	0.0288053	-1	15	79920195	79922455	-	2261	2260	0.411504	0.411504	0	lncRNA
DNAJB6P1	ENSG00000254612	3.01868	-1.4155	0.00129809	0.0247813	-1	11	127940913	127941654	-	742	741	0.431849	0.431849	0	processed_pseudogene
LINC00689	ENSG00000231419	2.42723	-1.41443	0.00035489	0.0101838	-1	7	159006522	159030195	+	23674	9151	0.527605	0.536007	0.522311	lncRNA
BORCS8	ENSG00000254901	2.97615	-1.41362	0.000356735	0.0101838	-1	19	19176903	19192591	-	15689	5367	0.543409	0.579094	0.524852	protein_coding
OXLD1	ENSG00000204237	3.82148	-1.39519	7.19717e-05	0.00365023	-1	17	81665036	81666635	-	1600	1599	0.621639	0.621639	0	protein_coding
OR51E2	ENSG00000167332	1.5797	-1.39172	0.00153988	0.027745	-1	11	4680171	4697854	-	17684	2903	0.396935	0.44609	0.38728	protein_coding
ENSG00000261526	ENSG00000261526	1.71405	-1.38605	0.000942078	0.0200844	-1	19	1874871	1876169	-	1299	1298	0.553929	0.553929	0	lncRNA
LTK	ENSG00000062524	4.73053	-1.37205	0.00210054	0.0345679	-1	15	41503637	41513887	-	10251	3473	0.579024	0.63605	0.549801	protein_coding
ARHGAP26	ENSG00000145819	5.81451	-1.37194	0.000272543	0.00850633	-1	5	142770377	143229011	+	458635	17117	0.421687	0.462231	0.420115	protein_coding
ZNF226	ENSG00000167380	3.7847	-1.36859	2.23127e-05	0.00173217	-1	19	44165073	44178381	+	13309	6913	0.403817	0.407059	0.400313	protein_coding
ZNF579	ENSG00000218891	2.54708	-1.36686	0.00288291	0.0419673	-1	19	55576774	55580848	-	4075	3318	0.646294	0.644967	0.652116	protein_coding
PSMG4	ENSG00000180822	2.89507	-1.36606	7.52798e-06	0.000827379	-1	6	3231403	3303373	+	71971	10405	0.498333	0.509947	0.49637	protein_coding
MRI1	ENSG00000037757	5.5287	-1.36416	2.05843e-06	0.000347861	-1	19	13764522	13774282	+	9761	3461	0.521926	0.542618	0.510557	protein_coding
STARD8	ENSG00000130052	5.24846	-1.36326	1.43485e-06	0.000282793	-1	X	68647666	68725842	+	78177	5541	0.50275	0.569572	0.497653	protein_coding
TLE5	ENSG00000104964	7.9769	-1.35325	0.000155949	0.0059915	-1	19	3052910	3063107	-	10198	5230	0.603707	0.608413	0.598752	protein_coding
NSUN5P2	ENSG00000106133	4.17769	-1.34546	1.02025e-05	0.00101281	-1	7	72947581	72954790	-	7210	2566	0.527812	0.561964	0.508938	transcribed_unprocessed_pseudogene
NOSTRIN	ENSG00000163072	4.34985	-1.34216	6.27167e-06	0.000714831	-1	2	168786539	168865514	+	78976	5225	0.411257	0.421244	0.410549	protein_coding
ZNF135	ENSG00000176293	2.90672	-1.32817	0.0027627	0.0406791	-1	19	58059239	58086310	+	27072	6411	0.49976	0.564499	0.479671	protein_coding
STAG3L3	ENSG00000174353	3.60571	-1.30689	2.5364e-09	2.7466e-06	-1	7	72969696	73005922	-	36227	3635	0.5045	0.541128	0.500414	transcribed_unprocessed_pseudogene
SREBF1	ENSG00000072310	6.07267	-1.30665	0.00250382	0.0386702	-1	17	17810399	17837002	-	26604	8218	0.580423	0.615235	0.564863	protein_coding
BCAR1	ENSG00000050820	7.13147	-1.30648	9.6034e-05	0.0044126	-1	16	75228181	75268053	-	39873	9179	0.596985	0.635472	0.585476	protein_coding
IRAG1	ENSG00000072952	4.85479	-1.30475	0.00283634	0.0413749	-1	11	10573091	10693988	-	120898	7675	0.456537	0.509967	0.452916	protein_coding
NEBL	ENSG00000078114	5.29301	-1.29799	0.00301473	0.0432505	-1	10	20779973	21293011	-	513039	17759	0.399471	0.388254	0.399874	protein_coding
PDXK	ENSG00000160209	7.1059	-1.29783	0.00275034	0.0406791	-1	21	43719094	43762307	+	43214	11892	0.572559	0.575429	0.57147	protein_coding
PAXX	ENSG00000148362	4.70128	-1.29271	0.000267878	0.00850633	-1	9	136992422	136993984	+	1563	1360	0.647887	0.65	0.633663	protein_coding
BLOC1S4	ENSG00000186222	3.68263	-1.28966	3.06293e-05	0.00208344	-1	4	6716174	6717664	+	1491	1490	0.526846	0.526846	0	protein_coding
PGAP3	ENSG00000161395	5.61435	-1.28962	0.00331399	0.0458152	-1	17	39671122	39696797	-	25676	3610	0.516105	0.587812	0.504373	protein_coding
ANXA6	ENSG00000197043	7.86168	-1.28705	4.55168e-06	0.000578816	-1	5	151100706	151157785	-	57080	5449	0.48969	0.520095	0.486481	protein_coding
NOTCH3	ENSG00000074181	8.36262	-1.28636	0.00108902	0.0221651	-1	19	15159038	15200995	-	41958	9375	0.548776	0.623147	0.527377	protein_coding
LIMS2	ENSG00000072163	5.42964	-1.28	1.44584e-05	0.00126404	-1	2	127638381	127681786	-	43406	8717	0.563553	0.636572	0.545203	protein_coding
ADGRL1.AS1	ENSG00000267169	2.30746	-1.26603	0.0035278	0.0477416	-1	19	14137146	14171267	+	34122	3216	0.559714	0.570274	0.558615	lncRNA
ITGA3	ENSG00000005884	6.77384	-1.26359	0.000306317	0.0092514	-1	17	50055968	50090481	+	34514	9778	0.526439	0.574044	0.507621	protein_coding
PRKCE	ENSG00000171132	4.66135	-1.24847	0.00110825	0.0224378	-1	2	45651345	46187990	+	536646	9944	0.444284	0.488737	0.443445	protein_coding
ZSCAN9	ENSG00000137185	3.61819	-1.24187	0.000427323	0.0117415	-1	6	28224886	28233487	+	8602	3705	0.434136	0.449123	0.422794	protein_coding
TRIB2	ENSG00000071575	5.70244	-1.21696	8.31819e-05	0.00399975	-1	2	12716910	12742734	+	25825	4563	0.476495	0.504274	0.470533	protein_coding
CLEC11A	ENSG00000105472	4.10542	-1.21615	0.001661	0.0292759	-1	19	50723364	50725718	+	2355	1430	0.665251	0.67972	0.642857	protein_coding
KLC2	ENSG00000174996	5.14542	-1.21395	0.000686232	0.0163509	-1	11	66257294	66267860	+	10567	5463	0.604675	0.62786	0.579855	protein_coding
RRS1	ENSG00000179041	2.98332	-1.20833	0.000364807	0.0103566	-1	8	66429014	66430733	+	1720	1719	0.562536	0.562536	0	protein_coding
LAMC3	ENSG00000050555	8.52193	-1.20307	1.29924e-05	0.00116229	-1	9	131009174	131094473	+	85300	8909	0.53656	0.611292	0.527844	protein_coding
DKK3	ENSG00000050165	5.41872	-1.19541	0.00106439	0.021808	-1	11	11956207	12009769	-	53563	11946	0.482077	0.462665	0.487649	protein_coding
DYSF	ENSG00000135636	7.50706	-1.19409	0.000309862	0.00929405	-1	2	71453561	71686763	+	233203	8483	0.496514	0.580573	0.493341	protein_coding
APCDD1	ENSG00000154856	5.37137	-1.19277	0.000632789	0.0156288	-1	18	10454635	10489949	+	35315	5930	0.462083	0.519899	0.450415	protein_coding
TAPT1.AS1	ENSG00000263327	1.94946	-1.18929	0.000951249	0.020161	-1	4	16226685	16320140	+	93456	2758	0.405436	0.50145	0.402516	lncRNA
ADPRH	ENSG00000144843	4.62587	-1.18515	0.000727337	0.0169056	-1	3	119579268	119589945	+	10678	4611	0.462396	0.501627	0.432575	protein_coding
JRK	ENSG00000234616	4.7831	-1.18199	0.00225804	0.0363468	-1	8	142657460	142681968	-	24509	11222	0.565815	0.576546	0.556751	protein_coding
PPP1R35	ENSG00000160813	3.73764	-1.17958	4.83223e-05	0.00281002	-1	7	100435282	100436497	-	1216	1117	0.673251	0.679499	0.602041	protein_coding
AFG3L1P	ENSG00000223959	5.43318	-1.17211	1.92695e-06	0.000334712	-1	16	89972586	90002161	+	29576	9515	0.509822	0.536731	0.497059	transcribed_unitary_pseudogene
ERVK13.1	ENSG00000260565	3.31017	-1.17211	0.00134391	0.0255293	-1	16	2660348	2682379	-	22032	11461	0.488176	0.478492	0.498675	lncRNA
ENSG00000270504	ENSG00000270504	4.66088	-1.16444	0.00374113	0.0494472	-1	6	3751111	3753871	+	2761	2760	0.622101	0.622101	0	lncRNA
RFXAP	ENSG00000133111	2.37234	-1.16336	0.000899916	0.0195028	-1	13	36819222	36829104	+	9883	2305	0.384538	0.443384	0.366636	protein_coding
ZNF419	ENSG00000105136	3.34776	-1.16263	2.60586e-05	0.00189134	-1	19	57487711	57496098	+	8388	8007	0.46584	0.463844	0.507895	protein_coding
ENSG00000258056	ENSG00000258056	3.00681	-1.15747	3.89874e-05	0.00243861	-1	12	55729104	55730852	+	1749	1441	0.569222	0.564192	0.592834	lncRNA
ENG	ENSG00000106991	7.84337	-1.15224	0.000341512	0.00989612	-1	9	127815013	127854658	-	39646	3820	0.531416	0.614136	0.522596	protein_coding
MBD6	ENSG00000166987	6.87382	-1.14925	0.00349043	0.0475706	-1	12	57520710	57530148	+	9439	5551	0.578512	0.604936	0.540777	protein_coding
STX3	ENSG00000166900	6.1722	-1.14683	0.000866488	0.0189924	-1	11	59713456	59805882	+	92427	7293	0.433947	0.448375	0.432711	protein_coding
UGDH.AS1	ENSG00000249348	2.14086	-1.14342	0.000914981	0.0196631	-1	4	39528019	39594707	+	66689	2782	0.422385	0.42775	0.422151	lncRNA
FRMD3	ENSG00000172159	4.57369	-1.14252	0.00262738	0.0397398	-1	9	83242990	83538546	-	295557	6466	0.41564	0.424219	0.415448	protein_coding
PDPR2P	ENSG00000214331	2.5349	-1.13857	0.00125809	0.0242485	-1	16	74332402	74368240	-	35839	3813	0.46886	0.523472	0.462358	transcribed_unprocessed_pseudogene
SSBP4	ENSG00000130511	5.77989	-1.13214	4.3996e-06	0.000565212	-1	19	18418864	18434562	+	15699	2955	0.645241	0.682572	0.636585	protein_coding
CMAHP	ENSG00000168405	5.31114	-1.13153	0.00115336	0.0231618	-1	6	25061626	25452263	-	390638	8439	0.40138	0.422562	0.400913	transcribed_unitary_pseudogene
LINC00963	ENSG00000204054	5.80059	-1.13149	0.00314587	0.0445312	-1	9	129476946	129513687	+	36742	14055	0.549931	0.52138	0.567619	lncRNA
PAXIP1.DT	ENSG00000273344	3.00051	-1.1307	0.00303888	0.0434359	-1	7	155003448	155005703	+	2256	2255	0.482927	0.482927	0	lncRNA
SUZ12P1	ENSG00000264538	3.78408	-1.13036	1.19309e-05	0.00111261	-1	17	30709299	30790908	+	81610	3760	0.453541	0.490426	0.451759	transcribed_unprocessed_pseudogene
ABCB8	ENSG00000197150	5.57429	-1.12088	0.00141373	0.0263036	-1	7	151028422	151047782	+	19361	9319	0.570351	0.586758	0.555124	protein_coding
SYTL2	ENSG00000137501	4.36211	-1.12084	0.000464693	0.0124352	-1	11	85694224	85811159	-	116936	11234	0.402223	0.420064	0.400327	protein_coding
CLTCL1	ENSG00000070371	2.90514	-1.1016	0.00329102	0.0455386	-1	22	19179473	19291719	-	112247	10019	0.464168	0.541371	0.456601	protein_coding
SDHAP1	ENSG00000185485	5.37428	-1.0985	0.000120895	0.00504124	-1	3	195959748	195990318	-	30571	3335	0.482434	0.546627	0.474573	transcribed_unprocessed_pseudogene
SNRNP70	ENSG00000104852	8.88346	-1.08491	3.12924e-06	0.000441739	-1	19	49085419	49108605	+	23187	4673	0.533814	0.613738	0.513639	protein_coding
FIZ1	ENSG00000179943	4.16355	-1.08258	0.00027236	0.00850633	-1	19	55591376	55601970	-	10595	6782	0.570984	0.608523	0.504197	protein_coding
TEAD2	ENSG00000074219	4.41879	-1.08212	0.00345248	0.0473048	-1	19	49340595	49362457	-	21863	2965	0.535724	0.588196	0.527491	protein_coding
NAT14	ENSG00000090971	3.48488	-1.0803	0.000576849	0.0146227	-1	19	55485188	55487568	+	2381	1977	0.657143	0.658068	0.652605	protein_coding
ZNF512	ENSG00000243943	3.31673	-1.07743	0.00241443	0.0377734	-1	2	27582969	27623217	+	40249	4386	0.41207	0.445508	0.407981	protein_coding
GPR137	ENSG00000173264	5.33077	-1.07718	0.00158098	0.0282461	-1	11	64270062	64289500	+	19439	4028	0.562712	0.637537	0.543154	protein_coding
THAP7	ENSG00000184436	3.7788	-1.0763	0.00304383	0.0434465	-1	22	20999104	21002196	-	3093	2877	0.622251	0.622871	0.613953	protein_coding
DOLK	ENSG00000175283	3.94319	-1.07363	8.97146e-05	0.00423447	-1	9	128945530	128947603	-	2074	2073	0.567294	0.567294	0	protein_coding
ACBD4	ENSG00000181513	3.68895	-1.07028	0.000567169	0.0145337	-1	17	45132600	45144181	+	11582	3765	0.544426	0.602656	0.516377	protein_coding
DOT1L	ENSG00000104885	6.43244	-1.06989	0.00101861	0.0211378	-1	19	2163933	2232578	+	68646	11455	0.595207	0.62811	0.588617	protein_coding
ZNF302	ENSG00000089335	4.89483	-1.0652	0.00224033	0.0361721	-1	19	34677639	34686397	+	8759	5026	0.398264	0.402308	0.392819	protein_coding
CEACAM19	ENSG00000186567	2.62998	-1.05978	0.00283509	0.0413749	-1	19	44662278	44684359	+	22082	5192	0.473076	0.544877	0.451004	protein_coding
MZF1	ENSG00000099326	5.50591	-1.04857	4.99755e-06	0.000625181	-1	19	58561931	58573575	-	11645	6648	0.553246	0.581227	0.516013	protein_coding
TRIM5	ENSG00000132256	3.85596	-1.03995	4.75932e-07	0.000116241	-1	11	5663195	5938619	-	275425	5336	0.375929	0.427099	0.374919	protein_coding
AHSA2P	ENSG00000173209	7.00098	-1.03865	0.000188099	0.00684226	-1	2	61177418	61191203	+	13786	9079	0.446065	0.436612	0.464301	transcribed_unitary_pseudogene
PRXL2B	ENSG00000157870	4.79387	-1.03694	0.00325513	0.0453684	-1	1	2586491	2591469	+	4979	3365	0.645842	0.626746	0.685679	protein_coding
DUBR	ENSG00000243701	4.59216	-1.0367	7.45229e-05	0.00373513	-1	3	107220744	107348464	+	127721	15309	0.387559	0.389575	0.387284	lncRNA
CYB561A3	ENSG00000162144	5.35313	-1.03418	0.00163545	0.0289582	-1	11	61348754	61362283	-	13530	10565	0.521472	0.525698	0.50641	protein_coding
ZBTB45	ENSG00000119574	3.50265	-1.03045	4.86875e-05	0.00281002	-1	19	58513530	58538911	-	25382	3001	0.536464	0.65978	0.519929	protein_coding
ENOSF1	ENSG00000132199	6.10578	-1.02654	0.000150603	0.00587814	-1	18	670318	712662	-	42345	11376	0.460915	0.469146	0.457892	protein_coding
RBPMS2	ENSG00000166831	2.81156	-1.02417	0.00351995	0.0477416	-1	15	64739891	64775589	-	35699	2095	0.527172	0.575656	0.52415	protein_coding
ASB16.AS1	ENSG00000267080	3.24036	-1.02338	0.00269071	0.0401182	-1	17	44175968	44186723	-	10756	3655	0.561878	0.555951	0.56493	lncRNA
CCDC85B	ENSG00000175602	4.69071	-1.02291	0.00305687	0.0435519	-1	11	65890673	65891635	+	963	962	0.716216	0.716216	0	protein_coding
DEXI	ENSG00000182108	4.53102	-1.02213	1.07837e-05	0.00103062	-1	16	10928891	10942468	-	13578	6689	0.513663	0.543131	0.485046	protein_coding
ZNF767P	ENSG00000133624	4.19517	-1.01636	0.000831768	0.0185216	-1	7	149547154	149624752	-	77599	4002	0.463582	0.516242	0.460718	transcribed_unprocessed_pseudogene
KCTD13	ENSG00000174943	4.24272	-1.01616	0.0021183	0.0347117	-1	16	29905012	29926236	-	21225	6449	0.482991	0.498992	0.476007	protein_coding
MAMDC4	ENSG00000177943	4.44552	-1.00979	0.00121387	0.0238238	-1	9	136850943	136860799	+	9857	5466	0.662744	0.667947	0.656264	protein_coding
WDR13	ENSG00000101940	6.27967	-1.00405	0.00307654	0.0437916	-1	X	48590042	48608869	+	18828	7864	0.51713	0.547813	0.49512	protein_coding
MFSD3	ENSG00000167700	2.69677	-1.00112	0.00211269	0.0346936	-1	8	144509070	144511213	+	2144	1824	0.669622	0.674342	0.642633	protein_coding
NSUN5P1	ENSG00000223705	4.52438	-0.98892	0.000848752	0.0186821	-1	7	75410322	75416787	+	6466	4816	0.535499	0.543189	0.513038	transcribed_unprocessed_pseudogene
SCARF1	ENSG00000074660	5.37384	-0.988172	6.72819e-05	0.00348554	-1	17	1633858	1645744	-	11887	4947	0.580767	0.629472	0.546044	protein_coding
AP3M2	ENSG00000070718	4.52309	-0.987597	0.00213836	0.0349287	-1	8	42152946	42171673	+	18728	6265	0.414001	0.46241	0.389665	protein_coding
ACAD9	ENSG00000177646	5.49023	-0.986202	0.00243711	0.0379264	-1	3	128879596	128924003	+	44408	11821	0.48087	0.525167	0.464801	protein_coding
ENKD1	ENSG00000124074	3.95587	-0.981752	9.44122e-05	0.00437566	-1	16	67662945	67667265	-	4321	2658	0.603935	0.641836	0.543321	protein_coding
MRPL20.AS1	ENSG00000224870	3.9093	-0.981094	0.00102378	0.0211732	-1	1	1399520	1402046	+	2527	2526	0.593824	0.593824	0	lncRNA
EML1	ENSG00000066629	5.21583	-0.978169	0.000332198	0.00971992	-1	14	99737693	99942060	+	204368	8898	0.451912	0.478647	0.450696	protein_coding
RRBP1	ENSG00000125844	9.69343	-0.973836	1.06772e-07	4.10725e-05	-1	20	17613678	17682295	-	68618	6955	0.525103	0.584759	0.518374	protein_coding
PPP1R12C	ENSG00000125503	7.03439	-0.971028	4.3172e-06	0.000562955	-1	19	55090914	55117637	-	26724	7784	0.576844	0.635534	0.552722	protein_coding
RAD51.AS1	ENSG00000245849	3.87245	-0.970562	0.000974557	0.0205273	-1	15	40686183	40695107	-	8925	2817	0.450471	0.461484	0.445391	lncRNA
LTO1	ENSG00000149716	4.61907	-0.96958	1.88407e-05	0.00155861	-1	11	69653076	69675416	-	22341	7865	0.535184	0.545582	0.529534	protein_coding
TCHP	ENSG00000139437	5.04324	-0.96093	2.26955e-05	0.00173217	-1	12	109900264	109983841	+	83578	9036	0.460151	0.495352	0.455883	protein_coding
AOPEP	ENSG00000148120	6.06068	-0.960165	0.002514	0.0387604	-1	9	94726699	95087159	+	360461	10655	0.428938	0.471516	0.427641	protein_coding
ORAI1	ENSG00000276045	3.66839	-0.953792	0.00247714	0.0383134	-1	12	121626550	121642677	+	16128	2260	0.536678	0.624779	0.522319	protein_coding
FRY	ENSG00000073910	3.72896	-0.951878	0.000111963	0.00489424	-1	13	31846713	32299125	+	452413	18781	0.392432	0.453277	0.389797	protein_coding
PPP1R3E	ENSG00000235194	3.93695	-0.942568	0.00227722	0.0364873	-1	14	23295652	23302859	-	7208	5544	0.518107	0.526154	0.491281	protein_coding
N6AMT1	ENSG00000156239	3.77957	-0.94205	0.00158422	0.0282461	-1	21	28872191	28885371	-	13181	4859	0.386191	0.437333	0.356327	protein_coding
GRK5	ENSG00000198873	5.68822	-0.936772	0.00270188	0.0402068	-1	10	119207571	119459745	+	252175	7005	0.504719	0.5399	0.503714	protein_coding
IRF2BP1	ENSG00000170604	4.57123	-0.932103	0.0035044	0.0477188	-1	19	45883608	45886141	-	2534	2533	0.685353	0.685353	0	protein_coding
ETV5	ENSG00000244405	5.5682	-0.92417	0.002655	0.0398269	-1	3	186046314	186110318	-	64005	5753	0.426911	0.477664	0.421898	protein_coding
FEZ2	ENSG00000171055	5.84951	-0.923764	6.73724e-08	2.87961e-05	-1	2	36531805	36646087	-	114283	8921	0.405409	0.387961	0.406887	protein_coding
EPB41L1	ENSG00000088367	5.07186	-0.92122	6.7833e-05	0.00348554	-1	20	36091504	36232799	+	141296	9640	0.499812	0.551141	0.496054	protein_coding
MUS81	ENSG00000172732	5.4339	-0.916093	1.45192e-06	0.000282793	-1	11	65857126	65867653	+	10528	5437	0.602071	0.592054	0.61277	protein_coding
FBXL15	ENSG00000107872	3.72468	-0.914584	0.00104162	0.0214269	-1	10	102419189	102423136	+	3948	2449	0.619458	0.612903	0.630174	protein_coding
SIRT7	ENSG00000187531	5.20394	-0.912969	0.000966041	0.0204169	-1	17	81911939	81921323	-	9385	6131	0.5763	0.58245	0.564709	protein_coding
RGL2	ENSG00000237441	7.33609	-0.912958	0.00294937	0.0426523	-1	6	33291654	33298942	-	7289	4143	0.566959	0.595221	0.52973	protein_coding
ENSG00000239665	ENSG00000239665	3.38402	-0.909151	0.00232216	0.0369505	-1	10	13631143	13668445	+	37303	14995	0.463246	0.449817	0.472273	lncRNA
PLCB3	ENSG00000149782	6.06852	-0.908042	0.000201317	0.00714217	-1	11	64251530	64269150	+	17621	4925	0.603121	0.611574	0.599842	protein_coding
ACAP3	ENSG00000131584	6.79505	-0.903156	0.0022538	0.0363468	-1	1	1292390	1309609	-	17220	8683	0.672919	0.663135	0.682873	protein_coding
LENG8	ENSG00000167615	8.95977	-0.898831	0.00063053	0.015598	-1	19	54448887	54462016	+	13130	6432	0.589535	0.616294	0.563835	protein_coding
MSANTD2	ENSG00000120458	4.54487	-0.898561	0.00020145	0.00714217	-1	11	124766498	124800706	-	34209	4528	0.401105	0.448322	0.393902	protein_coding
TLCD5	ENSG00000181264	3.76822	-0.898377	0.00352077	0.0477416	-1	11	120325296	120333686	+	8391	4302	0.428605	0.429568	0.427593	protein_coding
LUC7L3	ENSG00000108848	8.0426	-0.88721	0.000211391	0.00735899	-1	17	50719565	50756219	+	36655	8120	0.396492	0.380665	0.400995	protein_coding
MST1	ENSG00000173531	4.14672	-0.884921	0.00276159	0.0406791	-1	3	49683947	49689501	-	5555	5078	0.60677	0.606341	0.611345	protein_coding
DUSP7	ENSG00000164086	4.67885	-0.878238	0.000739787	0.0170917	-1	3	52048919	52056571	-	7653	5666	0.593962	0.589481	0.606747	protein_coding
CROCC	ENSG00000058453	5.84559	-0.87813	3.26267e-05	0.00216391	-1	1	16740273	16972964	+	232692	8836	0.385821	0.644522	0.375609	protein_coding
ATP13A2	ENSG00000159363	5.46886	-0.874798	0.00140934	0.0262766	-1	1	16985958	17011928	-	25971	5226	0.572314	0.632989	0.557029	protein_coding
COPS7B	ENSG00000144524	5.09074	-0.872591	9.12819e-06	0.000924049	-1	2	231781671	231809254	+	27584	6055	0.449008	0.472502	0.442401	protein_coding
ZNF692	ENSG00000171163	5.10712	-0.869963	0.00148565	0.0270408	-1	1	248850006	248859144	-	9139	3919	0.542022	0.585609	0.509293	protein_coding
TAZ	ENSG00000102125	5.09315	-0.86951	0.00183029	0.0314315	-1	X	154411524	154421726	+	10203	5972	0.560968	0.587743	0.523168	protein_coding
FBXO22	ENSG00000167196	4.81249	-0.867783	0.00142935	0.026466	-1	15	75903876	75942511	+	38636	11811	0.394435	0.379307	0.401096	protein_coding
TRADD	ENSG00000102871	4.51246	-0.866311	4.76119e-05	0.00281002	-1	16	67154185	67159909	-	5725	2169	0.586827	0.639004	0.554993	protein_coding
ENSG00000280128	ENSG00000280128	3.46781	-0.86136	0.00181051	0.0311963	-1	6	30282349	30286054	-	3706	3705	0.417004	0.417004	0	TEC
ATAD3B	ENSG00000160072	5.66077	-0.860743	0.000183719	0.00676287	-1	1	1471765	1497848	+	26084	7673	0.588276	0.612668	0.57811	protein_coding
ZBTB7A	ENSG00000178951	6.40264	-0.848506	0.00162199	0.0288109	-1	19	4043303	4066899	-	23597	6736	0.617054	0.600653	0.623606	protein_coding
FASTK	ENSG00000164896	5.96298	-0.846499	0.000109409	0.0048237	-1	7	151076593	151080866	-	4274	3803	0.617365	0.626348	0.544681	protein_coding
ARFRP1	ENSG00000101246	5.39376	-0.845888	7.77132e-06	0.00084598	-1	20	63698642	63708025	-	9384	7618	0.624321	0.620898	0.639093	protein_coding
URGCP	ENSG00000106608	5.55981	-0.8352	3.67301e-05	0.00235006	-1	7	43875894	43926411	-	50518	7378	0.456935	0.508268	0.448156	protein_coding
MIR4435.2HG	ENSG00000172965	4.39077	-0.834735	0.00236549	0.0372928	-1	2	111006015	111523376	-	517362	34187	0.442065	0.454998	0.44115	lncRNA
ZNF768	ENSG00000169957	4.69871	-0.831742	0.0013472	0.0255329	-1	16	30524004	30526821	-	2818	2366	0.645367	0.631445	0.718404	protein_coding
PPP1R12B	ENSG00000077157	6.54865	-0.831076	0.000818387	0.0184019	-1	1	202348699	202592706	+	244008	21035	0.396333	0.466508	0.389713	protein_coding
TRPM4	ENSG00000130529	5.23779	-0.829942	0.000177965	0.00659844	-1	19	49157741	49211836	+	54096	6581	0.503004	0.603252	0.489119	protein_coding
COA5	ENSG00000183513	4.18319	-0.827145	0.000781968	0.0176943	-1	2	98599314	98608515	-	9202	2751	0.428975	0.423119	0.431473	protein_coding
ZBTB18	ENSG00000179456	4.68861	-0.824724	0.00214414	0.0349492	-1	1	244048939	244057476	+	8538	3903	0.443481	0.433256	0.452093	protein_coding
CCDC71	ENSG00000177352	4.18423	-0.819067	0.000115909	0.00496101	-1	3	49162535	49166331	-	3797	1789	0.563488	0.591951	0.538117	protein_coding
SIRT6	ENSG00000077463	4.19782	-0.812983	0.0022928	0.0365969	-1	19	4174109	4182566	-	8458	2743	0.578692	0.6358	0.551278	protein_coding
DPH7	ENSG00000148399	4.85757	-0.805694	0.00237531	0.0373919	-1	9	137554444	137578925	-	24482	4916	0.527838	0.547396	0.522924	protein_coding
DIDO1	ENSG00000101191	6.75298	-0.800625	0.000663569	0.0160793	-1	20	62877738	62937952	-	60215	13266	0.491879	0.539801	0.478338	protein_coding
MAEA	ENSG00000090316	6.2906	-0.799762	0.00101461	0.0210971	-1	4	1289887	1340147	+	50261	9809	0.550119	0.588031	0.540926	protein_coding
SEPTIN7P2	ENSG00000214765	4.24991	-0.797814	0.00291851	0.0423253	-1	7	45723780	45768985	-	45206	4480	0.375998	0.429688	0.370092	transcribed_unprocessed_pseudogene
LSM7	ENSG00000130332	5.03294	-0.795913	0.000575105	0.0146227	-1	19	2321520	2328611	-	7092	1681	0.57707	0.588935	0.573383	protein_coding
ELMOD3	ENSG00000115459	4.80376	-0.795829	0.00245708	0.038112	-1	2	85354394	85391752	+	37359	7247	0.461427	0.508348	0.450135	protein_coding
RNF25	ENSG00000163481	4.13182	-0.795277	0.000537283	0.0138944	-1	2	218663892	218672002	-	8111	1878	0.492725	0.555378	0.473845	protein_coding
ATAD3A	ENSG00000197785	4.74114	-0.794293	0.000282905	0.00875866	-1	1	1512162	1534685	+	22524	3326	0.598677	0.656945	0.588582	protein_coding
PFDN6	ENSG00000204220	4.10509	-0.793813	0.000113587	0.00493717	-1	6	33289302	33298401	+	9100	2950	0.541378	0.563729	0.530655	protein_coding
SLC2A8	ENSG00000136856	4.87509	-0.790912	0.00206071	0.0341491	-1	9	127397138	127408424	+	11287	3917	0.577884	0.609906	0.560863	protein_coding
RNASEH2C	ENSG00000172922	4.49491	-0.782587	0.000673547	0.0162189	-1	11	65714005	65720818	-	6814	4969	0.555409	0.567317	0.523319	protein_coding
POMGNT1	ENSG00000085998	5.82209	-0.778588	0.00209957	0.0345679	-1	1	46188682	46220305	-	31624	6170	0.493849	0.551216	0.479943	protein_coding
NSMCE4A	ENSG00000107672	4.68323	-0.77841	4.67973e-05	0.00280183	-1	10	121957091	121975217	-	18127	3533	0.438486	0.474101	0.429864	protein_coding
RRP7BP	ENSG00000182841	4.15569	-0.770954	0.000911727	0.0196631	-1	22	42555223	42582038	-	26816	5083	0.54876	0.567972	0.544267	transcribed_unprocessed_pseudogene
METTL3	ENSG00000165819	5.59595	-0.770851	2.27398e-05	0.00173217	-1	14	21498133	21511342	-	13210	5850	0.42471	0.440855	0.411877	protein_coding
RNF145	ENSG00000145860	6.46146	-0.75799	0.00338057	0.0464852	-1	5	159157409	159210053	-	52645	4598	0.369729	0.460853	0.361008	protein_coding
EHBP1L1	ENSG00000173442	7.99048	-0.757966	0.00142018	0.0263635	-1	11	65576046	65592650	+	16605	6715	0.606059	0.62755	0.591465	protein_coding
HEG1	ENSG00000173706	6.39487	-0.75448	0.0011756	0.0233406	-1	3	124965710	125055997	-	90288	9944	0.449943	0.491553	0.444793	protein_coding
POGLUT1	ENSG00000163389	4.27106	-0.74645	0.00378017	0.0497566	-1	3	119468963	119494708	+	25746	7061	0.411497	0.425011	0.40639	protein_coding
PLEC	ENSG00000178209	9.50248	-0.737608	0.00314271	0.0445275	-1	8	143915153	143976734	-	61582	16948	0.63617	0.671525	0.622746	protein_coding
NRDE2	ENSG00000119720	4.99784	-0.736574	0.00170399	0.0298966	-1	14	90267860	90331969	-	64110	17377	0.441015	0.489037	0.423158	protein_coding
ABHD17A	ENSG00000129968	7.15233	-0.733528	3.03801e-06	0.000432832	-1	19	1876810	1885496	-	8687	6157	0.650933	0.653727	0.644128	protein_coding
TMEM150A	ENSG00000168890	4.86312	-0.731609	0.00140277	0.0262266	-1	2	85598547	85603196	-	4650	3086	0.601635	0.601102	0.602687	protein_coding
TMEM222	ENSG00000186501	4.57475	-0.729568	0.000506712	0.0133965	-1	1	27322145	27336400	+	14256	4470	0.518765	0.581432	0.490138	protein_coding
RSRP1	ENSG00000117616	7.21519	-0.724569	0.000416825	0.0115314	-1	1	25242249	25338213	-	95965	6717	0.463986	0.476552	0.463041	protein_coding
MYL12B	ENSG00000118680	7.64318	-0.721554	0.00102108	0.0211459	-1	18	3261479	3278461	+	16983	1731	0.407373	0.486424	0.3984	protein_coding
TELO2	ENSG00000100726	5.73533	-0.720901	5.00584e-05	0.00284225	-1	16	1493344	1510457	+	17114	4219	0.630924	0.659398	0.621607	protein_coding
SNAPC3	ENSG00000164975	4.98592	-0.717379	0.00228056	0.0364873	-1	9	15422704	15465953	+	43250	6674	0.397836	0.393018	0.398715	protein_coding
KLC1	ENSG00000126214	5.86381	-0.71353	0.00103579	0.0213642	-1	14	103561896	103714249	+	152354	19232	0.495829	0.561616	0.486324	protein_coding
ADAM15	ENSG00000143537	6.31991	-0.712573	0.00139306	0.0261085	-1	1	155050566	155062775	+	12210	6562	0.582439	0.622066	0.536391	protein_coding
ZFYVE27	ENSG00000155256	5.13619	-0.710924	0.00052695	0.0137194	-1	10	97737121	97760907	+	23787	3885	0.485328	0.55547	0.471635	protein_coding
EBNA1BP2	ENSG00000117395	5.58001	-0.709808	0.00262011	0.0397398	-1	1	43164175	43270936	-	106762	3545	0.443786	0.468265	0.442945	protein_coding
ZBED5	ENSG00000236287	5.22193	-0.706283	0.000730499	0.016928	-1	11	10812074	10858796	-	46723	9018	0.407667	0.417277	0.405368	protein_coding
ST7L	ENSG00000007341	3.7506	-0.702331	0.00267865	0.039977	-1	1	112523514	112620825	-	97312	8084	0.390501	0.4452	0.385545	protein_coding
AGRN	ENSG00000188157	6.08715	-0.70223	0.00259177	0.0396024	-1	1	1020120	1056118	+	35999	10723	0.657092	0.657745	0.656815	protein_coding
ZNF224	ENSG00000267680	5.13116	-0.699306	0.000744173	0.0171673	-1	19	44094339	44109886	+	15548	7098	0.399691	0.41082	0.390342	protein_coding
SPECC1L	ENSG00000100014	4.76492	-0.698708	0.00299959	0.0432048	-1	22	24270817	24417739	+	146923	7442	0.422864	0.51599	0.417895	protein_coding
ZNF865	ENSG00000261221	4.16123	-0.697679	0.00373151	0.049412	-1	19	55605647	55617269	+	11623	3761	0.57916	0.708854	0.51711	protein_coding
ZNF316	ENSG00000205903	6.47349	-0.695905	0.000103041	0.00463293	-1	7	6637318	6658279	+	20962	7654	0.603263	0.625555	0.590441	protein_coding
MITD1	ENSG00000158411	4.01976	-0.693542	0.00334335	0.046091	-1	2	99161427	99181058	-	19632	4298	0.390963	0.393904	0.390139	protein_coding
ZNF444	ENSG00000167685	4.54705	-0.691718	0.00102956	0.0212642	-1	19	56132599	56160893	+	28295	7133	0.540221	0.585868	0.524833	protein_coding
MTA1	ENSG00000182979	6.44372	-0.688488	0.000930449	0.0199121	-1	14	105419820	105470729	+	50910	6945	0.594158	0.647372	0.585752	protein_coding
TRIM27	ENSG00000204713	5.84099	-0.68746	9.24865e-05	0.00429936	-1	6	28903002	28923988	-	20987	7978	0.446631	0.453372	0.442497	protein_coding
CENPB	ENSG00000125817	6.29135	-0.673673	0.000669769	0.0161532	-1	20	3783851	3786740	-	2890	2889	0.665282	0.665282	0	protein_coding
CCDC97	ENSG00000142039	4.98373	-0.672769	0.00203803	0.0339385	-1	19	41310172	41324873	+	14702	3822	0.535474	0.589482	0.5165	protein_coding
SPTAN1	ENSG00000197694	8.74638	-0.67166	1.83884e-05	0.00152942	-1	9	128552558	128633662	+	81105	16243	0.468189	0.522995	0.454464	protein_coding
LEMD2	ENSG00000161904	6.51283	-0.670694	9.05823e-06	0.000924049	-1	6	33771202	33789130	-	17929	6774	0.531627	0.558754	0.515152	protein_coding
PDCD2	ENSG00000071994	4.80391	-0.669744	0.000225396	0.00770705	-1	6	170575295	170584692	-	9398	6468	0.416409	0.421923	0.404234	protein_coding
DEAF1	ENSG00000177030	4.73913	-0.669114	0.000922405	0.019795	-1	11	644233	707118	-	62886	6399	0.533243	0.568995	0.529193	protein_coding
LRRC14	ENSG00000160959	4.73112	-0.66701	0.00021131	0.00735899	-1	8	144517992	144525172	+	7181	6125	0.631755	0.63151	0.633175	protein_coding
ARFGAP1	ENSG00000101199	6.98335	-0.659245	0.00038853	0.0109093	-1	20	63272785	63289790	+	17006	6594	0.597236	0.617076	0.58467	protein_coding
TTC31	ENSG00000115282	5.1753	-0.658137	0.000216429	0.0074668	-1	2	74483073	74494559	+	11487	4762	0.509229	0.539479	0.487805	protein_coding
PPP6R2	ENSG00000100239	6.5395	-0.65579	0.000840104	0.0186194	-1	22	50343304	50445090	+	101787	5324	0.511279	0.582832	0.507329	protein_coding
SORBS3	ENSG00000120896	7.40938	-0.64442	0.00348912	0.0475706	-1	8	22544986	22575788	+	30803	5842	0.558405	0.642075	0.538822	protein_coding
MIB2	ENSG00000197530	6.25101	-0.643523	0.000474815	0.0126453	-1	1	1615454	1630605	+	15152	8709	0.663851	0.665863	0.66113	protein_coding
TMEM129	ENSG00000168936	5.26599	-0.641052	0.00121071	0.0237921	-1	4	1715952	1721358	-	5407	3436	0.624676	0.627183	0.620305	protein_coding
ZRANB2	ENSG00000132485	6.41514	-0.640233	0.000929683	0.0199121	-1	1	71063291	71081289	-	17999	4975	0.341927	0.337487	0.343623	protein_coding
HPS6	ENSG00000166189	4.11695	-0.639083	0.00348311	0.0475551	-1	10	102065349	102068036	+	2688	2687	0.64198	0.64198	0	protein_coding
NAT9	ENSG00000109065	5.17395	-0.626922	0.00157405	0.0281954	-1	17	74770529	74776367	-	5839	4061	0.54111	0.558237	0.50197	protein_coding
ZNF506	ENSG00000081665	4.47908	-0.626353	0.00278425	0.0408401	-1	19	19785839	19821751	-	35913	9529	0.404879	0.390597	0.410037	protein_coding
EMC10	ENSG00000161671	6.72261	-0.620762	0.00176127	0.0305188	-1	19	50476400	50490871	+	14472	10740	0.571073	0.566946	0.582954	protein_coding
REPIN1	ENSG00000214022	6.00792	-0.612717	2.9865e-05	0.00205149	-1	7	150368189	150374044	+	5856	4644	0.622886	0.61714	0.644922	protein_coding
RAB1B	ENSG00000174903	7.19208	-0.609313	0.000136789	0.00554341	-1	11	66268590	66277492	+	8903	1944	0.555156	0.608025	0.540385	protein_coding
TBCD	ENSG00000141556	7.07535	-0.609304	0.000714613	0.0167109	-1	17	82752042	82945914	+	193873	23021	0.528472	0.547934	0.52585	protein_coding
TRIM41	ENSG00000146063	6.08817	-0.595902	0.00174881	0.0303713	-1	5	181222499	181235808	+	13310	12809	0.521001	0.521586	0.506	protein_coding
SURF6	ENSG00000148296	5.65864	-0.594189	0.000946333	0.0200844	-1	9	133328776	133336188	-	7413	4409	0.528063	0.523475	0.534799	protein_coding
PIGQ	ENSG00000007541	4.6303	-0.587912	0.00147254	0.0268486	-1	16	566995	584109	+	17115	7843	0.643391	0.661737	0.627872	protein_coding
TBL3	ENSG00000183751	4.63293	-0.585662	0.00352678	0.0477416	-1	16	1972053	1982929	+	10877	7100	0.642883	0.63831	0.651483	protein_coding
GATD1	ENSG00000177225	5.96474	-0.581326	0.000826574	0.0185216	-1	11	767220	777488	-	10269	5503	0.602454	0.591677	0.6149	protein_coding
MSL1	ENSG00000188895	7.05579	-0.581041	3.01806e-05	0.00206395	-1	17	40121971	40136917	+	14947	7716	0.460792	0.482633	0.437483	protein_coding
MAN2C1	ENSG00000140400	7.32915	-0.579983	0.00360482	0.0482745	-1	15	75355207	75368612	-	13406	9110	0.572249	0.59989	0.51362	protein_coding
GDI1	ENSG00000203879	7.37557	-0.578952	0.00116114	0.023173	-1	X	154436913	154443467	+	6555	5249	0.597955	0.59097	0.626054	protein_coding
EEF1D	ENSG00000104529	8.01692	-0.569006	0.000214765	0.00742603	-1	8	143579697	143599541	-	19845	9375	0.619835	0.61952	0.620117	protein_coding
CYHR1	ENSG00000187954	5.71778	-0.556005	0.00161755	0.0288053	-1	8	144449582	144465667	-	16086	9782	0.619521	0.628297	0.605902	protein_coding
METTL17	ENSG00000165792	5.43412	-0.554587	0.00278143	0.0408376	-1	14	20989973	20997035	+	7063	4238	0.447749	0.465078	0.421742	protein_coding
RHOT2	ENSG00000140983	6.71066	-0.546213	0.0031284	0.0444065	-1	16	668105	674174	+	6070	5147	0.663371	0.661745	0.672451	protein_coding
PIN1	ENSG00000127445	5.26943	-0.542012	0.00115969	0.023173	-1	19	9835257	9849689	+	14433	4574	0.563193	0.574115	0.558125	protein_coding
ARF1	ENSG00000143761	8.6635	-0.539239	0.00136826	0.0257377	-1	1	228082660	228099212	+	16553	3273	0.52326	0.574091	0.510731	protein_coding
UBE2J2	ENSG00000160087	5.67897	-0.531237	0.00361363	0.0483083	-1	1	1253909	1273864	-	19956	4680	0.563167	0.582906	0.557119	protein_coding
RBCK1	ENSG00000125826	6.75862	-0.530529	0.000233993	0.00784409	-1	20	407498	432139	+	24642	5183	0.512682	0.601003	0.489156	protein_coding
OAZ2	ENSG00000180304	6.5682	-0.501181	0.00128978	0.0247145	-1	15	64687573	64703281	-	15709	7665	0.478228	0.491585	0.465498	protein_coding
FUS	ENSG00000089280	8.54182	-0.498493	0.000540747	0.0139605	-1	16	31180138	31191605	+	11468	6977	0.470742	0.461373	0.485301	protein_coding
KCTD10	ENSG00000110906	6.07171	-0.492503	0.000910731	0.0196631	-1	12	109448655	109477359	-	28705	9675	0.475927	0.476176	0.4758	protein_coding
PPP1R37	ENSG00000104866	5.43232	-0.489941	0.00195582	0.0327823	-1	19	45091396	45148077	+	56682	7690	0.555618	0.619376	0.54561	protein_coding
DAZAP1	ENSG00000071626	7.23186	-0.481383	0.000297308	0.00904087	-1	19	1407569	1435687	+	28119	9188	0.587453	0.57771	0.592182	protein_coding
KIAA0100	ENSG00000007202	7.36943	-0.459467	0.00173926	0.0302761	-1	17	28614446	28645454	-	31009	9196	0.467557	0.505763	0.451449	protein_coding
MLLT6	ENSG00000275023	8.2423	-0.458054	0.00243996	0.0379264	-1	17	38705273	38729795	+	24523	13556	0.564554	0.570375	0.557359	protein_coding
POLRMT	ENSG00000099821	5.38546	-0.457871	0.00230494	0.0367145	-1	19	617221	633537	-	16317	5041	0.610995	0.662964	0.587761	protein_coding
ATG4B	ENSG00000168397	6.3035	-0.452021	0.00185444	0.0315702	-1	2	241637213	241673857	+	36645	6623	0.523278	0.592632	0.507978	protein_coding
PNISR	ENSG00000132424	7.87709	-0.424586	0.00242882	0.0378645	-1	6	99397629	99425331	-	27703	11284	0.359396	0.345533	0.368924	protein_coding
ARHGAP21	ENSG00000107863	6.92292	0.360042	0.00283383	0.0413749	1	10	24583609	24723887	-	140279	11125	0.390296	0.43182	0.38672	protein_coding
ZNF217	ENSG00000171940	6.33893	0.406223	0.000131865	0.00542513	1	20	53567071	53609907	-	42837	6165	0.440471	0.438767	0.440757	protein_coding
CLSTN1	ENSG00000171603	8.11429	0.439045	4.20231e-05	0.00258644	1	1	9728926	9823984	-	95059	5221	0.471922	0.562344	0.466667	protein_coding
DHX36	ENSG00000174953	6.15094	0.452947	0.000827446	0.0185216	1	3	154272546	154324487	-	51942	10526	0.354883	0.371461	0.35067	protein_coding
HECA	ENSG00000112406	5.53641	0.454523	0.00367525	0.0489372	1	6	139135080	139180802	+	45723	5642	0.417983	0.452676	0.413099	protein_coding
ARHGAP12	ENSG00000165322	5.72667	0.459015	0.000698159	0.016527	1	10	31805398	31928876	-	123479	5923	0.369369	0.377174	0.368976	protein_coding
EIF4A2	ENSG00000156976	8.67464	0.466048	0.00354859	0.0478547	1	3	186783205	186789897	+	6693	6128	0.419157	0.403557	0.588652	protein_coding
EIF4B	ENSG00000063046	8.8305	0.47084	0.00123642	0.0240821	1	12	53006282	53042215	+	35934	6011	0.427128	0.451838	0.422164	protein_coding
YME1L1	ENSG00000136758	7.44122	0.475332	1.28669e-05	0.00116229	1	10	27110111	27155266	-	45156	7315	0.383612	0.411347	0.378251	protein_coding
GLUD1	ENSG00000148672	7.17759	0.490529	0.00074784	0.0172261	1	10	87050202	87094843	-	44642	14268	0.420219	0.401248	0.429131	protein_coding
CHD1	ENSG00000153922	6.05341	0.521629	0.000944028	0.0200844	1	5	98853985	98929007	-	75023	10451	0.35183	0.367046	0.349367	protein_coding
PHAX	ENSG00000164902	5.28078	0.522811	0.000287803	0.00887169	1	5	126600925	126627252	+	26328	3657	0.432598	0.42111	0.434451	protein_coding
GMFB	ENSG00000197045	5.68655	0.528789	0.000718206	0.0167694	1	14	54474484	54489026	-	14543	7788	0.366249	0.350411	0.384513	protein_coding
SLC25A5	ENSG00000005022	7.31888	0.539851	0.00237663	0.0373919	1	X	119468422	119471396	+	2975	1550	0.525555	0.484516	0.570225	protein_coding
CHD7	ENSG00000171316	5.94782	0.545376	0.00267255	0.0399248	1	8	60678740	60868028	+	189289	16982	0.399941	0.450948	0.394914	protein_coding
ARHGAP5	ENSG00000100852	6.39697	0.550458	0.00242404	0.0378283	1	14	32076114	32159728	+	83615	10877	0.369507	0.365726	0.370073	protein_coding
MBNL3	ENSG00000076770	8.96817	0.551857	0.000571625	0.0145864	1	X	132369317	132489968	-	120652	12832	0.369636	0.375312	0.368961	protein_coding
RTN3	ENSG00000133318	6.60776	0.559989	1.29507e-05	0.00116229	1	11	63681446	63759891	+	78446	5781	0.4212	0.417921	0.42146	protein_coding
KIAA1191	ENSG00000122203	6.07134	0.562385	0.000347924	0.0100253	1	5	176346062	176361807	-	15746	3800	0.468847	0.500789	0.458686	protein_coding
TNRC6B	ENSG00000100354	5.43887	0.563885	0.00204741	0.0340211	1	22	40044817	40335808	+	290992	19969	0.421522	0.448645	0.419523	protein_coding
PHF20	ENSG00000025293	5.83188	0.571185	0.00125536	0.0242485	1	20	35771974	35950370	+	178397	8344	0.440767	0.448945	0.440365	protein_coding
MMP14	ENSG00000157227	9.13078	0.575217	0.00273238	0.040543	1	14	22836560	22849041	+	12482	4610	0.57247	0.586768	0.564096	protein_coding
OXSR1	ENSG00000172939	5.685	0.576729	0.00110498	0.0224009	1	3	38165089	38255484	+	90396	6052	0.386747	0.439524	0.38296	protein_coding
NAV1	ENSG00000134369	6.30665	0.589349	0.000976537	0.0205273	1	1	201622885	201826969	+	204085	22420	0.474452	0.49603	0.471789	protein_coding
CDV3	ENSG00000091527	7.43509	0.589547	0.00121706	0.023856	1	3	133573686	133590261	+	16576	4405	0.424736	0.461067	0.411586	protein_coding
JOSD1	ENSG00000100221	5.97792	0.59647	0.00339072	0.046583	1	22	38685543	38701556	-	16014	4321	0.478174	0.524647	0.460999	protein_coding
TAF1D	ENSG00000166012	6.0242	0.597085	2.46002e-05	0.00181112	1	11	93729948	93784391	-	54444	7963	0.417942	0.363305	0.427302	protein_coding
DIS3L	ENSG00000166938	5.01199	0.604593	0.000449226	0.012148	1	15	66293217	66333898	+	40682	5416	0.429168	0.48209	0.421041	protein_coding
KIF1B	ENSG00000054523	5.63798	0.608116	0.000767836	0.0175032	1	1	10210570	10381603	+	171034	17902	0.420375	0.445369	0.417453	protein_coding
SH3D19	ENSG00000109686	6.31566	0.611345	0.00216223	0.0351694	1	4	151102751	151325605	-	222855	7736	0.407828	0.424638	0.407223	protein_coding
MYO18A	ENSG00000196535	6.46513	0.614661	6.46682e-05	0.00339607	1	17	29071122	29180398	-	109277	14983	0.537337	0.580258	0.530517	protein_coding
TOR1AIP1	ENSG00000143337	5.85656	0.614877	1.9414e-05	0.00158895	1	1	179882042	179920077	+	38036	4677	0.388248	0.453496	0.379099	protein_coding
CD276	ENSG00000103855	6.50994	0.618078	0.000133227	0.00546657	1	15	73683966	73714514	+	30549	5467	0.525108	0.586428	0.511742	protein_coding
RTN4	ENSG00000115310	8.00744	0.618318	0.000150898	0.00587814	1	2	54972187	55112621	-	140435	6627	0.386018	0.449676	0.382865	protein_coding
ACOX1	ENSG00000161533	6.47627	0.619392	0.000363394	0.0103356	1	17	75941507	75979177	-	37671	8271	0.441784	0.442631	0.441546	protein_coding
ATF2	ENSG00000115966	5.50484	0.624739	0.00145123	0.026647	1	2	175072250	175168382	-	96133	5730	0.360494	0.370681	0.359848	protein_coding
DBT	ENSG00000137992	4.96685	0.629193	0.000337747	0.00981659	1	1	100186919	100249834	-	62916	11603	0.391496	0.392226	0.391331	protein_coding
ABI1	ENSG00000136754	6.20873	0.630839	0.000774491	0.0176028	1	10	26746593	26861087	-	114495	4205	0.384387	0.377646	0.384644	protein_coding
SH3RF1	ENSG00000154447	4.90347	0.632314	0.00208563	0.034433	1	4	169094259	169270956	-	176698	5458	0.392412	0.461708	0.390203	protein_coding
BMPR1A	ENSG00000107779	4.96285	0.6356	0.00116618	0.0232134	1	10	86756601	86932825	+	176225	9502	0.398958	0.406967	0.398502	protein_coding
SNTB2	ENSG00000168807	4.69497	0.638307	0.000567673	0.0145337	1	16	69187129	69309052	+	121924	9867	0.419207	0.416844	0.419415	protein_coding
TMCC1	ENSG00000172765	5.4328	0.650195	0.000605556	0.015225	1	3	129647792	129893711	-	245920	8225	0.393963	0.459939	0.39168	protein_coding
ZNF106	ENSG00000103994	6.16447	0.659146	0.00196395	0.0328114	1	15	42412823	42491141	-	78319	12201	0.413558	0.440292	0.408624	protein_coding
APAF1	ENSG00000120868	4.59662	0.660791	0.0025662	0.0393679	1	12	98645290	98735433	+	90144	7732	0.394296	0.414899	0.392363	protein_coding
RC3H1	ENSG00000135870	5.25685	0.66478	0.00295979	0.0427627	1	1	173931084	174022357	-	91274	11678	0.385919	0.385854	0.385929	protein_coding
SDE2	ENSG00000143751	4.95633	0.668068	0.000223849	0.0076712	1	1	225982702	225999343	-	16642	3980	0.406165	0.409799	0.405023	protein_coding
OSBPL9	ENSG00000117859	6.6469	0.671852	0.00256329	0.0393626	1	1	51577179	51798427	+	221249	10240	0.400822	0.424121	0.399691	protein_coding
DEK	ENSG00000124795	7.25393	0.672748	0.000495836	0.0131316	1	6	18223860	18264548	-	40689	7238	0.391467	0.378834	0.3942	protein_coding
KDM1A	ENSG00000004487	6.23858	0.676669	0.00328767	0.0455386	1	1	23019443	23083689	+	64247	5421	0.391666	0.465597	0.384853	protein_coding
RSRC2	ENSG00000111011	7.1808	0.68786	0.00266377	0.0399099	1	12	122503454	122527000	-	23547	8732	0.398454	0.391777	0.40239	protein_coding
SLC29A1	ENSG00000112759	6.69429	0.690205	0.000946097	0.0200844	1	6	44219553	44234142	+	14590	4282	0.568031	0.581037	0.562627	protein_coding
CRY2	ENSG00000121671	5.29634	0.691906	0.00178929	0.0309346	1	11	45847118	45883248	+	36131	6186	0.491281	0.551568	0.478827	protein_coding
NPEPPS	ENSG00000141279	7.17554	0.692462	0.000270949	0.00850633	1	17	47522942	47624665	+	101724	12858	0.413053	0.39874	0.415124	protein_coding
GCC2	ENSG00000135968	6.11369	0.693304	0.00239128	0.0375564	1	2	108449191	108509415	+	60225	12627	0.382422	0.375386	0.384289	protein_coding
FMNL2	ENSG00000157827	8.03571	0.69437	0.00101932	0.0211378	1	2	152335174	152649826	+	314653	6546	0.405734	0.432325	0.405169	protein_coding
ELF1	ENSG00000120690	6.48001	0.696031	0.00136313	0.025704	1	13	40931924	41061440	-	129517	4429	0.387952	0.419056	0.386851	protein_coding
ELF4	ENSG00000102034	6.52927	0.700109	0.00084798	0.0186821	1	X	130063955	130110716	-	46762	5227	0.516841	0.545246	0.513266	protein_coding
MALT1	ENSG00000172175	4.68574	0.701848	0.000639907	0.0157037	1	18	58671465	58754477	+	83013	11430	0.389281	0.385564	0.389875	protein_coding
TAF5L	ENSG00000135801	5.21495	0.703936	0.000266518	0.00850633	1	1	229593121	229626047	-	32927	6395	0.419152	0.445661	0.412762	protein_coding
APLP2	ENSG00000084234	9.95392	0.705629	3.25904e-05	0.00216391	1	11	130068147	130144811	+	76665	7439	0.439724	0.477618	0.435652	protein_coding
OAT	ENSG00000065154	5.96532	0.715141	7.04739e-06	0.000785784	1	10	124397303	124418976	-	21674	3374	0.424907	0.411085	0.427455	protein_coding
PGM3	ENSG00000013375	6.32265	0.71652	0.000226419	0.00770775	1	6	83161150	83193936	-	32787	7461	0.386598	0.402359	0.381955	protein_coding
NEU1	ENSG00000204386	6.37847	0.725544	0.0014616	0.0267097	1	6	31857659	31862905	-	5247	4819	0.528403	0.521477	0.606557	protein_coding
USP25	ENSG00000155313	6.58138	0.729339	0.000209968	0.00734269	1	21	15729982	15880064	+	150083	7834	0.35418	0.382436	0.352624	protein_coding
TMEM65	ENSG00000164983	3.87761	0.731608	0.000701887	0.0165389	1	8	124306189	124372701	-	66513	9031	0.358657	0.389879	0.353752	protein_coding
DNMT1	ENSG00000130816	8.74884	0.736109	0.0021165	0.0347117	1	19	10133342	10231286	-	97945	15336	0.504349	0.539841	0.497761	protein_coding
CCNG1	ENSG00000113328	6.03169	0.736481	0.000133917	0.00548026	1	5	163437569	163446151	+	8583	3088	0.375087	0.373057	0.376229	protein_coding
HPS5	ENSG00000110756	5.61179	0.73773	0.00136309	0.025704	1	11	18278668	18322198	-	43531	6408	0.397519	0.423065	0.393109	protein_coding
EFL1	ENSG00000140598	4.46536	0.738526	0.00353335	0.0477509	1	15	82130233	82262734	-	132502	4684	0.380374	0.448335	0.377884	protein_coding
CBX1	ENSG00000108468	5.96141	0.743663	0.000333538	0.00972788	1	17	48070052	48101478	-	31427	3035	0.459238	0.497199	0.455179	protein_coding
EIF4A3	ENSG00000141543	6.74806	0.748114	0.00328994	0.0455386	1	17	80134369	80147151	-	12783	5772	0.462369	0.471933	0.454494	protein_coding
DCAF6	ENSG00000143164	6.22967	0.750907	0.000306636	0.0092514	1	1	167935783	168075843	+	140061	6278	0.359132	0.439312	0.355369	protein_coding
BLOC1S6	ENSG00000104164	5.62132	0.754724	0.00244018	0.0379264	1	15	45587214	45615945	+	28732	6762	0.395879	0.399882	0.394647	protein_coding
CDC42EP3	ENSG00000163171	5.27104	0.758878	0.00373979	0.0494472	1	2	37641882	37738468	-	96587	9955	0.413776	0.410347	0.41417	protein_coding
GALNT1	ENSG00000141429	6.8822	0.760728	0.000312755	0.00931141	1	18	35581117	35711834	+	130718	5111	0.384946	0.379182	0.385181	protein_coding
MSH6	ENSG00000116062	6.07332	0.761721	0.000233599	0.00784409	1	2	47695530	47810063	+	114534	10937	0.4465	0.436866	0.447517	protein_coding
PPP3CA	ENSG00000138814	5.71475	0.763135	2.78425e-06	0.000418321	1	4	101023409	101348278	-	324870	5195	0.35795	0.432916	0.356732	protein_coding
TGIF1	ENSG00000177426	6.12156	0.763355	0.00321101	0.044998	1	18	3411608	3459978	+	48371	8109	0.438495	0.479714	0.430193	protein_coding
PCYOX1	ENSG00000116005	6.37842	0.764909	0.00322429	0.0450993	1	2	70257386	70281185	+	23800	5855	0.452372	0.423399	0.461826	protein_coding
TRAF6	ENSG00000175104	4.5798	0.765215	0.000545307	0.0140312	1	11	36483769	36510272	-	26504	8120	0.382749	0.412438	0.369635	protein_coding
RAB11FIP1	ENSG00000156675	6.97625	0.765325	0.000184984	0.0067726	1	8	37858618	37899497	-	40880	9627	0.458842	0.492365	0.448515	protein_coding
KLHL21	ENSG00000162413	5.10685	0.77088	0.00367657	0.0489372	1	1	6590724	6614607	-	23884	6895	0.544655	0.600435	0.522016	protein_coding
FAH	ENSG00000103876	3.8012	0.771636	0.00339954	0.0466626	1	15	80152490	80186946	+	34457	10145	0.499565	0.520749	0.490724	protein_coding
CMTM6	ENSG00000091317	6.71981	0.773817	7.57496e-05	0.00374778	1	3	32481312	32502852	-	21541	3853	0.385237	0.374254	0.387629	protein_coding
SLC12A6	ENSG00000140199	4.83152	0.776404	0.00116917	0.0232429	1	15	34229784	34338060	-	108277	10481	0.395545	0.449385	0.389775	protein_coding
GTF2B	ENSG00000137947	4.47587	0.777471	0.000112979	0.00492466	1	1	88852633	88891944	-	39312	2515	0.397955	0.394831	0.398168	protein_coding
EIF5	ENSG00000100664	7.83655	0.777799	0.000145053	0.00572291	1	14	103333544	103345025	+	11482	8307	0.449351	0.433249	0.491493	protein_coding
ARL5B	ENSG00000165997	5.44219	0.778715	0.000270566	0.00850633	1	10	18659431	18681639	+	22209	7164	0.371848	0.332077	0.390787	protein_coding
WASHC4	ENSG00000136051	6.33493	0.786998	0.000313467	0.00931141	1	12	105107324	105169130	+	61807	7659	0.352684	0.351482	0.352854	protein_coding
ARHGAP10	ENSG00000071205	4.90464	0.789523	2.12364e-05	0.00169308	1	4	147732063	148072776	+	340714	10732	0.409424	0.444279	0.40829	protein_coding
MAPK14	ENSG00000112062	6.66306	0.789956	0.000560385	0.0143951	1	6	36027677	36111236	+	83560	6845	0.39882	0.437984	0.395325	protein_coding
STRN	ENSG00000115808	5.45029	0.793231	0.00171715	0.0300248	1	2	36837698	36966536	-	128839	14333	0.377264	0.374241	0.377643	protein_coding
UVRAG	ENSG00000198382	5.83529	0.799254	2.1251e-06	0.000347861	1	11	75815210	76144232	+	329023	7323	0.38743	0.459375	0.385792	protein_coding
SLC2A9	ENSG00000109667	3.56362	0.804694	0.00180663	0.0311643	1	4	9771153	10054936	-	283784	6606	0.453276	0.503179	0.452087	protein_coding
RLIM	ENSG00000131263	5.25607	0.807239	0.000462422	0.012396	1	X	74582976	74614624	-	31649	10622	0.386912	0.394088	0.383287	protein_coding
ALDH6A1	ENSG00000119711	4.42631	0.808689	0.000270463	0.00850633	1	14	74056847	74084492	-	27646	6671	0.434111	0.425274	0.436922	protein_coding
STX6	ENSG00000135823	5.18422	0.809345	0.00115908	0.023173	1	1	180972712	181023121	-	50410	6468	0.40711	0.436302	0.402813	protein_coding
NFIL3	ENSG00000165030	5.76946	0.815981	0.000269111	0.00850633	1	9	91409045	91423832	-	14788	2053	0.418881	0.46225	0.411889	protein_coding
BACH1	ENSG00000156273	6.48276	0.819089	0.000276845	0.00860568	1	21	29194071	29630751	+	436681	7648	0.396059	0.398666	0.396012	protein_coding
RFFL	ENSG00000092871	3.82623	0.82703	0.000165661	0.00626377	1	17	35005990	35089319	-	83330	8354	0.433451	0.474503	0.428876	protein_coding
JAZF1	ENSG00000153814	4.39216	0.828446	0.00153133	0.0276231	1	7	27830573	28180795	-	350223	4245	0.414449	0.42874	0.414273	protein_coding
HELZ	ENSG00000198265	6.06352	0.830813	4.86621e-07	0.000116994	1	17	67070444	67245989	-	175546	15644	0.381669	0.399962	0.379879	protein_coding
BRD2	ENSG00000204256	8.59598	0.839018	0.000361039	0.0102876	1	6	32968594	32981505	+	12912	8979	0.515142	0.523666	0.495677	protein_coding
PER1	ENSG00000179094	7.23338	0.841082	0.000914263	0.0196631	1	17	8140472	8156506	-	16035	6980	0.589747	0.617622	0.568257	protein_coding
SLC35D1	ENSG00000116704	5.22603	0.842591	0.00101279	0.0210877	1	1	66999350	67054148	-	54799	6181	0.378627	0.417894	0.373635	protein_coding
HOMER1	ENSG00000152413	4.71036	0.848921	0.00352313	0.0477416	1	5	79372636	79514134	-	141499	6062	0.372034	0.395084	0.371002	protein_coding
EIF2AK3	ENSG00000172071	5.92272	0.851542	0.000305264	0.00924624	1	2	88556741	88691518	-	134778	20670	0.403867	0.403725	0.403893	protein_coding
FANCM	ENSG00000187790	3.07509	0.854743	0.00252952	0.0389607	1	14	45135930	45200890	+	64961	8453	0.375092	0.372057	0.375546	protein_coding
SNHG1	ENSG00000255717	5.08699	0.855795	0.00265006	0.0398269	1	11	62851984	62855953	-	3970	3969	0.421013	0.421013	0	lncRNA
DDX3X	ENSG00000215301	9.18993	0.862958	2.54777e-06	0.00040415	1	X	41333348	41364472	+	31125	15818	0.426841	0.408648	0.445642	protein_coding
ATP11B	ENSG00000058063	4.96539	0.863557	0.000709555	0.0166787	1	3	182793503	182921629	+	128127	9153	0.360216	0.377035	0.358922	protein_coding
BTG3	ENSG00000154640	5.95135	0.867088	0.00196116	0.0328114	1	21	17593653	17612945	-	19293	2297	0.377358	0.433609	0.369756	protein_coding
TPST2	ENSG00000128294	6.87873	0.873681	0.00334592	0.046091	1	22	26521996	26596717	-	74722	6900	0.484857	0.490145	0.484319	protein_coding
SPATS2	ENSG00000123352	4.27142	0.874737	0.00333405	0.0460099	1	12	49366584	49527425	+	160842	6818	0.416822	0.476239	0.414191	protein_coding
DHTKD1	ENSG00000181192	5.20843	0.876556	0.00262088	0.0397398	1	10	12068954	12123221	+	54268	5278	0.462159	0.481243	0.460103	protein_coding
GNPTAB	ENSG00000111670	5.65673	0.877518	0.00143947	0.0265895	1	12	101745499	101830959	-	85461	9750	0.409537	0.415897	0.408717	protein_coding
ITGA6	ENSG00000091409	8.33099	0.878155	0.00116558	0.0232134	1	2	172427354	172506459	+	79106	6651	0.417824	0.423996	0.417258	protein_coding
SKP2	ENSG00000145604	7.1156	0.881453	0.000976204	0.0205273	1	5	36151989	36196849	+	44861	17366	0.392577	0.382068	0.399214	protein_coding
LRIG3	ENSG00000139263	4.82383	0.884838	0.000818307	0.0184019	1	12	58872149	58920504	-	48356	5856	0.391211	0.447746	0.383421	protein_coding
SSBP3	ENSG00000157216	6.38812	0.887238	6.53027e-06	0.00073344	1	1	54225433	54413479	-	188047	6928	0.509296	0.535364	0.508298	protein_coding
MME	ENSG00000196549	7.37832	0.887302	0.00221046	0.0358402	1	3	155024124	155183704	+	159581	9830	0.37521	0.39766	0.373736	protein_coding
LIPA	ENSG00000107798	6.64464	0.887314	0.00124084	0.0241258	1	10	89213569	89414557	-	200989	4872	0.414293	0.42303	0.414076	protein_coding
FAXDC2	ENSG00000170271	4.79451	0.893169	0.000769432	0.0175137	1	5	154818492	154859252	-	40761	6916	0.471516	0.502892	0.465105	protein_coding
YPEL5	ENSG00000119801	6.95643	0.895006	2.27611e-06	0.000368658	1	2	30146941	30160533	+	13593	3415	0.418923	0.456223	0.406407	protein_coding
HSP90AB1	ENSG00000096384	10.1017	0.899491	0.00353779	0.0477509	1	6	44246166	44253888	+	7723	2966	0.491064	0.489548	0.49201	protein_coding
MCM6	ENSG00000076003	5.5573	0.899921	0.00144764	0.0266127	1	2	135839626	135876443	-	36818	4118	0.402912	0.423021	0.400379	protein_coding
DPP4	ENSG00000197635	8.49779	0.90023	2.26948e-05	0.00173217	1	2	161992245	162074394	-	82150	14403	0.396402	0.424009	0.390532	protein_coding
LRIG1	ENSG00000144749	4.64197	0.901441	0.00112358	0.0226586	1	3	66378797	66501263	-	122467	7017	0.460675	0.548668	0.455327	protein_coding
NANS	ENSG00000095380	4.91749	0.9071	0.00148674	0.0270408	1	9	98056732	98083077	+	26346	4925	0.462289	0.490152	0.455882	protein_coding
KAT2B	ENSG00000114166	5.45285	0.911807	0.000627126	0.0155639	1	3	20040446	20154404	+	113959	5192	0.400656	0.410439	0.400189	protein_coding
TPGS2	ENSG00000134779	4.90713	0.913199	0.000408617	0.0113696	1	18	36777647	36829216	-	51570	10553	0.428184	0.456363	0.420933	protein_coding
MRPS6	ENSG00000243927	3.9342	0.91925	0.000439959	0.0119817	1	21	34073224	34143034	+	69811	4267	0.402994	0.423717	0.401645	protein_coding
PPP1CC	ENSG00000186298	6.51893	0.922597	2.10274e-06	0.000347861	1	12	110719680	110742939	-	23260	6899	0.415194	0.411074	0.416932	protein_coding
TLCD2	ENSG00000185561	4.16002	0.923623	0.00057431	0.0146227	1	17	1702816	1710377	-	7562	5880	0.518185	0.49881	0.585961	protein_coding
ISY1	ENSG00000240682	3.70741	0.924587	0.000141082	0.0056489	1	3	129127415	129161063	-	33649	3859	0.451825	0.545219	0.439726	protein_coding
ISOC1	ENSG00000066583	4.56563	0.926885	0.00138062	0.0259068	1	5	129094749	129114028	+	19280	1937	0.389284	0.427465	0.385019	protein_coding
GPR137B	ENSG00000077585	4.69014	0.92719	0.00340265	0.0466636	1	1	236142505	236221865	+	79361	2299	0.436278	0.46107	0.435538	protein_coding
RALGPS2	ENSG00000116191	4.363	0.93024	0.00269767	0.040183	1	1	178725147	178921841	+	196695	9158	0.368181	0.363398	0.368415	protein_coding
DDX5	ENSG00000108654	9.62657	0.931011	0.00168307	0.029631	1	17	64498254	64508199	-	9946	9306	0.438512	0.433914	0.505477	protein_coding
BTG1	ENSG00000133639	7.31826	0.931142	0.000175023	0.00655252	1	12	92140278	92145846	-	5569	4851	0.423851	0.396413	0.609484	protein_coding
ARHGAP18	ENSG00000146376	6.1355	0.934769	0.000510008	0.0134375	1	6	129576132	129710177	-	134046	4575	0.385147	0.377923	0.385402	protein_coding
TCAF2	ENSG00000170379	3.77843	0.940699	0.000776861	0.0176306	1	7	143620952	143730410	+	109459	6399	0.227174	0.496015	0.210481	protein_coding
ASPH	ENSG00000198363	6.92404	0.955971	2.73166e-05	0.00194593	1	8	61500556	61714640	-	214085	20010	0.381687	0.377111	0.382158	protein_coding
CTHRC1	ENSG00000164932	6.04985	0.956325	0.000965783	0.0204169	1	8	103371538	103382989	+	11452	1739	0.398655	0.434158	0.392298	protein_coding
PGAP1	ENSG00000197121	4.64483	0.964016	0.00328368	0.0455386	1	2	196833004	196927796	-	94793	12732	0.36003	0.344094	0.362503	protein_coding
STON1	ENSG00000243244	4.95854	0.967963	4.86126e-05	0.00281002	1	2	48529383	48598513	+	69131	7704	0.451758	0.442368	0.452935	protein_coding
SRGAP1	ENSG00000196935	4.14152	0.968465	0.00169408	0.0297565	1	12	63844700	64162217	+	317518	26208	0.394228	0.416743	0.392202	protein_coding
ARL6IP1	ENSG00000170540	6.14542	0.968717	0.000153967	0.0059675	1	16	18791669	18801572	-	9904	3551	0.406442	0.399606	0.410264	protein_coding
PDK1	ENSG00000152256	3.68835	0.972006	0.00141057	0.0262766	1	2	172555373	172608669	+	53297	14830	0.395189	0.400674	0.393074	protein_coding
ITPR2	ENSG00000123104	6.22604	0.976102	0.000283804	0.00876887	1	12	26335352	26833194	-	497843	13849	0.382601	0.411726	0.381768	protein_coding
FNBP1L	ENSG00000137942	6.21502	0.977044	2.82284e-06	0.000418321	1	1	93448118	93554661	+	106544	5795	0.373445	0.383434	0.372871	protein_coding
TP53I11	ENSG00000175274	6.48728	0.977595	0.000393558	0.0110304	1	11	44885903	44951306	-	65404	7329	0.548538	0.598172	0.542274	protein_coding
DENND4C	ENSG00000137145	6.4639	0.978923	1.219e-05	0.00112993	1	9	19230435	19374281	+	143847	9448	0.387088	0.397015	0.38639	protein_coding
HACD2	ENSG00000206527	4.94753	0.987065	0.000323412	0.00953322	1	3	123490820	123585053	-	94234	5209	0.40507	0.414283	0.404531	protein_coding
SMPDL3A	ENSG00000172594	5.64021	0.987185	0.0001611	0.00612061	1	6	122789049	122809720	+	20672	2341	0.404673	0.39513	0.405892	protein_coding
ARRDC3	ENSG00000113369	7.4849	0.994751	5.77184e-06	0.000695293	1	5	91368631	91383317	-	14687	4975	0.357007	0.387337	0.341468	protein_coding
QSER1	ENSG00000060749	4.66487	0.995676	2.89946e-06	0.000418321	1	11	32892811	32993316	+	100506	10892	0.386876	0.395795	0.385792	protein_coding
ZFAND5	ENSG00000107372	8.14709	0.998198	7.5261e-10	1.05276e-06	1	9	72351413	72365235	-	13823	7057	0.398929	0.437721	0.358463	protein_coding
PTBP3	ENSG00000119314	6.37051	0.99995	1.40791e-06	0.000281345	1	9	112217716	112333664	-	115949	8220	0.376962	0.374574	0.377144	protein_coding
ECI2	ENSG00000198721	5.41985	1.00048	0.000479896	0.0127313	1	6	4115693	4135597	-	19905	4566	0.417002	0.46452	0.402856	protein_coding
P3H2	ENSG00000090530	4.96166	1.00335	0.000370929	0.010511	1	3	189956728	190122437	-	165710	5555	0.381832	0.473447	0.378654	protein_coding
CPEB2	ENSG00000137449	4.182	1.00499	2.84402e-05	0.00200738	1	4	15002481	15070153	+	67673	7357	0.350795	0.442708	0.339584	protein_coding
CREG1	ENSG00000143162	7.24908	1.00743	5.93599e-05	0.00318248	1	1	167529117	167553805	-	24689	3280	0.444953	0.457012	0.443105	protein_coding
CPEB3	ENSG00000107864	2.95524	1.009	0.00328566	0.0455386	1	10	92046692	92291078	-	244387	7908	0.408649	0.419702	0.408279	protein_coding
SPTY2D1	ENSG00000179119	5.24404	1.01071	0.000299672	0.00909478	1	11	18606403	18634791	-	28389	5892	0.419262	0.417346	0.419764	protein_coding
SLC1A3	ENSG00000079215	6.1501	1.01394	0.000125936	0.0052231	1	5	36596588	36688334	+	91747	21209	0.40392	0.415814	0.400343	protein_coding
PNRC1	ENSG00000146278	7.48733	1.01456	1.64953e-05	0.00141007	1	6	89080751	89085160	+	4410	2989	0.485144	0.471061	0.514789	protein_coding
NUP210	ENSG00000132182	5.95788	1.0158	0.00124807	0.0241793	1	3	13316235	13420322	-	104088	8154	0.526022	0.57898	0.52152	protein_coding
SLC6A8	ENSG00000130821	5.93364	1.023	0.00315965	0.0446443	1	X	153687926	153696588	+	8663	5686	0.650081	0.63542	0.678091	protein_coding
LTBP1	ENSG00000049323	7.65573	1.0285	5.17552e-05	0.00289584	1	2	32946953	33399509	+	452557	7311	0.402551	0.508138	0.400818	protein_coding
CSRP2	ENSG00000175183	5.41092	1.03126	0.000668574	0.0161532	1	12	76858709	76879023	-	20315	5837	0.423501	0.402261	0.432065	protein_coding
NAV2	ENSG00000166833	6.59803	1.03314	7.77998e-05	0.00380226	1	11	19350724	20121601	+	770878	15125	0.445052	0.525355	0.443444	protein_coding
RND3	ENSG00000115963	6.60817	1.03454	0.000156534	0.0059915	1	2	150468195	150539011	-	70817	3585	0.386579	0.402232	0.385745	protein_coding
DMD	ENSG00000198947	5.45089	1.03491	6.69482e-05	0.00348017	1	X	31097677	33339609	-	2241933	54936	0.364202	0.377658	0.363864	protein_coding
MET	ENSG00000105976	7.06785	1.05266	0.0012807	0.0245808	1	7	116672196	116798377	+	126182	7200	0.390954	0.436111	0.388222	protein_coding
IFFO2	ENSG00000169991	5.75947	1.05527	0.00300162	0.0432048	1	1	18904280	18956676	-	52397	6170	0.543305	0.567261	0.540107	protein_coding
SESN2	ENSG00000130766	5.46619	1.05898	0.000142117	0.00566322	1	1	28259518	28282491	+	22974	3452	0.500675	0.594728	0.484043	protein_coding
GALNT7	ENSG00000109586	4.67141	1.05904	5.11457e-05	0.00288271	1	4	173168811	173323967	+	155157	6794	0.389659	0.387989	0.389736	protein_coding
CAT	ENSG00000121691	7.07348	1.05992	0.000271088	0.00850633	1	11	34438934	34472060	+	33127	3565	0.405875	0.43338	0.402557	protein_coding
PRKCI	ENSG00000163558	5.20194	1.06198	0.000290994	0.00893007	1	3	170222424	170305977	+	83554	5760	0.397951	0.38125	0.399188	protein_coding
FBN1	ENSG00000166147	9.6877	1.0696	2.40449e-06	0.000385395	1	15	48408313	48645721	-	237409	18459	0.389132	0.446936	0.384258	protein_coding
AGL	ENSG00000162688	6.04799	1.07203	0.00358268	0.0481456	1	1	99850361	99924023	+	73663	8121	0.363322	0.367812	0.362765	protein_coding
KBTBD8	ENSG00000163376	3.15959	1.08109	0.000183365	0.00676287	1	3	66998307	67011210	+	12904	4732	0.366891	0.366864	0.366907	protein_coding
CYFIP2	ENSG00000055163	5.79261	1.08194	0.000245881	0.00808413	1	5	157266079	157395595	+	129517	10460	0.442911	0.511759	0.436862	protein_coding
NT5DC1	ENSG00000178425	4.36303	1.08336	0.000374565	0.0105751	1	6	116100851	116249497	+	148647	7293	0.362889	0.364185	0.362822	protein_coding
FAM53C	ENSG00000120709	6.1223	1.09589	1.94509e-11	5.98583e-08	1	5	138331935	138349729	+	17795	7037	0.484545	0.513855	0.465371	protein_coding
KANK4	ENSG00000132854	6.27686	1.09591	0.000472542	0.0126233	1	1	62236165	62319434	-	83270	6804	0.469575	0.530864	0.464121	protein_coding
PLBD1	ENSG00000121316	5.39331	1.10263	0.00071107	0.0166787	1	12	14503661	14567883	-	64223	2363	0.40564	0.469742	0.403191	protein_coding
DCN	ENSG00000011465	10.5566	1.10442	0.00145475	0.026657	1	12	91140484	91183217	-	42734	12926	0.348981	0.366703	0.341296	protein_coding
PGPEP1	ENSG00000130517	5.14294	1.10556	0.000416653	0.0115314	1	19	18340598	18369950	+	29353	7502	0.513117	0.531458	0.506819	protein_coding
CPT1A	ENSG00000110090	6.59062	1.10724	0.00119837	0.0236219	1	11	68754620	68844410	-	89791	6546	0.50039	0.508708	0.499736	protein_coding
COL3A1	ENSG00000168542	12.3859	1.10933	0.00308054	0.0438079	1	2	188974373	189012746	+	38374	6709	0.33792	0.480996	0.307605	protein_coding
AP1S3	ENSG00000152056	3.05892	1.12294	0.000197084	0.00706885	1	2	223751686	223838027	-	86342	5937	0.424109	0.398686	0.425986	protein_coding
FOSL2	ENSG00000075426	7.66403	1.1266	5.46322e-05	0.003013	1	2	28392448	28417317	+	24870	7155	0.518075	0.533333	0.511911	protein_coding
TP63	ENSG00000073282	5.36095	1.12832	0.00371219	0.0493117	1	3	189631389	189897276	+	265888	7462	0.371331	0.421067	0.369895	protein_coding
PIK3IP1	ENSG00000100100	5.83726	1.13053	0.00262501	0.0397398	1	22	31281594	31292534	-	10941	3798	0.512523	0.531859	0.50224	protein_coding
TPK1	ENSG00000196511	3.10539	1.13632	0.00360077	0.0482622	1	7	144451941	144836395	-	384455	8418	0.37295	0.4134	0.372044	protein_coding
ADD3	ENSG00000148700	6.70063	1.14572	0.000202891	0.00717676	1	10	109996368	110135565	+	139198	6516	0.386459	0.395948	0.385993	protein_coding
F11R	ENSG00000158769	6.41408	1.15132	3.10078e-07	8.67486e-05	1	1	160995211	161021343	-	26133	5051	0.472295	0.477925	0.470945	protein_coding
TSHZ3	ENSG00000121297	4.46422	1.15217	0.00304711	0.0434531	1	19	31149979	31349436	-	199458	8270	0.442191	0.49867	0.439747	protein_coding
DDX19A	ENSG00000168872	3.74343	1.15598	4.23309e-05	0.002595	1	16	70346861	70373383	+	26523	7836	0.470854	0.504084	0.45692	protein_coding
GAREM1	ENSG00000141441	4.55903	1.16038	0.000586944	0.0148297	1	18	32124877	32470882	-	346006	7957	0.394257	0.44929	0.392962	protein_coding
NR1D1	ENSG00000126368	4.43544	1.16256	0.000296654	0.00904087	1	17	40092793	40100589	-	7797	2622	0.565418	0.588101	0.553923	protein_coding
RAB30	ENSG00000137502	4.64201	1.16727	7.80718e-06	0.00084598	1	11	82973133	83071923	-	98791	11821	0.412056	0.383893	0.415884	protein_coding
MAN1A1	ENSG00000111885	7.33468	1.17055	0.0037113	0.0493117	1	6	119177205	119349761	-	172557	5005	0.375971	0.425974	0.374477	protein_coding
SESTD1	ENSG00000187231	4.99761	1.17223	5.07574e-06	0.000629842	1	2	179101678	179264832	-	163155	11384	0.369087	0.383169	0.368031	protein_coding
ING1	ENSG00000153487	4.48168	1.17284	5.76581e-05	0.00312389	1	13	110712736	110723339	+	10604	6088	0.498538	0.500493	0.495903	protein_coding
IL6ST	ENSG00000134352	9.51356	1.17424	0.000262516	0.00850633	1	5	55935095	55995022	-	59928	10098	0.374372	0.363933	0.376488	protein_coding
PELI2	ENSG00000139946	2.66046	1.17534	0.00210761	0.0346472	1	14	56117814	56301524	+	183711	6232	0.399156	0.429878	0.398078	protein_coding
PLK2	ENSG00000145632	6.96654	1.17935	0.00115801	0.023173	1	5	58453982	58460139	-	6158	4637	0.417411	0.424197	0.396711	protein_coding
TCF7L2	ENSG00000148737	5.67416	1.18097	2.6043e-06	0.000408902	1	10	112950247	113167678	+	217432	6713	0.446004	0.467749	0.445311	protein_coding
NRIP1	ENSG00000180530	5.73018	1.18203	1.24763e-05	0.0011427	1	21	14961235	15065936	-	104702	8489	0.365928	0.394864	0.363375	protein_coding
CKAP2	ENSG00000136108	4.93208	1.18393	0.000153112	0.00594932	1	13	52455429	52476628	+	21200	4537	0.388603	0.364338	0.395211	protein_coding
CDH11	ENSG00000140937	7.60557	1.18942	0.00374381	0.0494472	1	16	64943753	65126112	-	182360	13251	0.403775	0.432948	0.401489	protein_coding
FOXRED2	ENSG00000100350	4.68324	1.19002	1.48284e-06	0.000285205	1	22	36487190	36507043	-	19854	5510	0.526318	0.550817	0.516907	protein_coding
GALNT6	ENSG00000139629	4.93529	1.19855	0.00365784	0.0487722	1	12	51351247	51392867	-	41621	7331	0.498895	0.539626	0.490186	protein_coding
GASK1B	ENSG00000164125	5.92784	1.20069	0.00317358	0.0447588	1	4	158124474	158173318	-	48845	7872	0.3711	0.398882	0.365762	protein_coding
CDKN1A	ENSG00000124762	6.9555	1.20473	5.42045e-05	0.00300016	1	6	36676460	36687337	+	10878	2988	0.544176	0.575636	0.53226	protein_coding
METTL7A	ENSG00000185432	6.75322	1.20729	0.000895719	0.0194523	1	12	50923472	50932510	+	9039	4073	0.428635	0.440462	0.418933	protein_coding
IDH1	ENSG00000138413	7.4072	1.20766	0.000628779	0.0155797	1	2	208236229	208266074	-	29846	4686	0.412732	0.444942	0.406733	protein_coding
GAMT	ENSG00000130005	2.8706	1.20825	0.00162339	0.0288109	1	19	1397026	1401570	-	4545	2397	0.642606	0.610763	0.678156	protein_coding
BCAT1	ENSG00000060982	6.01761	1.21049	1.6154e-05	0.00138861	1	12	24810024	24949101	-	139078	11399	0.400059	0.383367	0.401549	protein_coding
CLMP	ENSG00000166250	5.94834	1.21515	0.00372073	0.0493117	1	11	123069872	123195248	-	125377	5050	0.450278	0.445347	0.450485	protein_coding
HMOX1	ENSG00000100292	7.20669	1.21548	0.000659876	0.016015	1	22	35380361	35394214	+	13854	2300	0.511081	0.584348	0.496494	protein_coding
CD28	ENSG00000178562	5.01558	1.21583	0.00018855	0.0068425	1	2	203706475	203738912	+	32438	4881	0.400037	0.426142	0.395413	protein_coding
NUAK1	ENSG00000074590	4.17458	1.21935	0.000169961	0.00637851	1	12	106063345	106138954	-	75610	5917	0.455528	0.501437	0.45163	protein_coding
GNA13	ENSG00000120063	6.82748	1.22008	2.37282e-05	0.00177422	1	17	65009289	65056740	-	47452	6426	0.400624	0.38531	0.403023	protein_coding
SLC25A42	ENSG00000181035	3.45629	1.22055	0.000192895	0.0069673	1	19	19063994	19113030	+	49037	4658	0.525634	0.588235	0.519063	protein_coding
TMEM37	ENSG00000171227	4.90355	1.22124	0.00108741	0.0221651	1	2	119429901	119438504	+	8604	2286	0.553528	0.564742	0.54947	protein_coding
GPRC5B	ENSG00000167191	6.01528	1.22503	1.21292e-07	4.55198e-05	1	16	19856691	19886167	-	29477	6645	0.510822	0.520843	0.507906	protein_coding
CMBL	ENSG00000164237	3.11113	1.22789	0.0012812	0.0245808	1	5	10275875	10307902	-	32028	4873	0.463734	0.477529	0.461258	protein_coding
MCL1	ENSG00000143384	9.61959	1.22843	0.000841	0.0186194	1	1	150560895	150579738	-	18844	6218	0.475614	0.454809	0.485861	protein_coding
HIF1A	ENSG00000100644	6.96944	1.22871	0.000400693	0.0111693	1	14	61695513	61748259	+	52747	5134	0.372483	0.387222	0.370894	protein_coding
ADAM9	ENSG00000168615	7.4061	1.23064	2.87284e-06	0.000418321	1	8	38996754	39105445	+	108692	17680	0.375017	0.363857	0.377185	protein_coding
HPGDS	ENSG00000163106	4.85055	1.2344	0.0025506	0.0392461	1	4	94298535	94342876	-	44342	2104	0.38549	0.390209	0.385255	protein_coding
CCDC80	ENSG00000091986	6.15489	1.2373	0.000118087	0.00503274	1	3	112596797	112649530	-	52734	13058	0.402803	0.424491	0.395665	protein_coding
RGL1	ENSG00000143344	6.10229	1.23876	0.000103877	0.00463293	1	1	183636085	183928532	+	292448	5286	0.399799	0.474839	0.398418	protein_coding
GPR87	ENSG00000138271	3.40629	1.23952	0.000100273	0.00455132	1	3	151294086	151316820	-	22735	1563	0.398654	0.420985	0.397005	protein_coding
TOP1MT	ENSG00000184428	4.08244	1.23966	1.92847e-06	0.000334712	1	8	143304384	143359979	-	55596	6398	0.543034	0.578149	0.538468	protein_coding
PRSS12	ENSG00000164099	6.17263	1.24165	0.000310927	0.00930786	1	4	118280038	118353003	-	72966	5710	0.365093	0.460946	0.356955	protein_coding
TCP1	ENSG00000120438	7.50055	1.25274	0.000196623	0.00706877	1	6	159778498	159789703	-	11206	4872	0.408478	0.436166	0.387178	protein_coding
PCOLCE2	ENSG00000163710	6.41792	1.25411	1.07434e-05	0.00103062	1	3	142815922	142889206	-	73285	3518	0.409243	0.457931	0.406788	protein_coding
GAS2L3	ENSG00000139354	4.16546	1.25491	3.65668e-07	9.70093e-05	1	12	100573683	100628288	+	54606	7410	0.366047	0.383941	0.363238	protein_coding
ARNTL	ENSG00000133794	3.91869	1.25545	9.87585e-05	0.00450919	1	11	13276652	13387266	+	110615	6911	0.454328	0.450441	0.454587	protein_coding
SPECC1	ENSG00000128487	4.32496	1.26047	8.87293e-05	0.00420086	1	17	20008865	20319026	+	310162	21220	0.425315	0.459378	0.422813	protein_coding
EPOR	ENSG00000187266	5.33616	1.26512	0.00266739	0.0399154	1	19	11377207	11384342	-	7136	3070	0.570568	0.599349	0.548831	protein_coding
RASGEF1B	ENSG00000138670	5.18021	1.27102	7.37273e-05	0.00370877	1	4	81426393	82044244	-	617852	10160	0.390494	0.41378	0.390105	protein_coding
RADX	ENSG00000147231	3.82295	1.27263	0.00214415	0.0349492	1	X	106611930	106679439	+	67510	4835	0.351627	0.392761	0.348454	protein_coding
TMEM170B	ENSG00000205269	3.36469	1.27721	0.000622005	0.0155118	1	6	11537749	11583524	+	45776	8888	0.370573	0.373087	0.369968	protein_coding
DEPP1	ENSG00000165507	7.76543	1.27964	0.00281896	0.0412818	1	10	44970981	44978809	-	7829	2976	0.572049	0.573925	0.570899	protein_coding
ISM2	ENSG00000100593	9.25485	1.28497	1.65978e-12	1.74919e-08	1	14	77474394	77498816	-	24423	4090	0.527148	0.608802	0.510722	protein_coding
EHHADH	ENSG00000113790	3.1702	1.28701	0.000272178	0.00850633	1	3	185190624	185281990	-	91367	4641	0.397829	0.420168	0.396633	protein_coding
THRB	ENSG00000151090	3.71778	1.28784	9.64029e-05	0.00441474	1	3	24117153	24495756	-	378604	10947	0.38875	0.451357	0.386886	protein_coding
HSP90AA1	ENSG00000080824	10.4934	1.28813	0.00262392	0.0397398	1	14	102080742	102139699	-	58958	5086	0.472514	0.454385	0.474225	protein_coding
NRP2	ENSG00000118257	7.95808	1.29343	0.000144314	0.00570838	1	2	205681990	205798133	+	116144	13872	0.458805	0.486952	0.454987	protein_coding
KRT80	ENSG00000167767	6.19314	1.2977	0.00275304	0.0406791	1	12	52168996	52192014	-	23019	4356	0.557129	0.57438	0.553103	protein_coding
FAM83B	ENSG00000168143	3.67911	1.2996	0.00290223	0.0421289	1	6	54846771	54945099	+	98329	6239	0.358453	0.377464	0.357165	protein_coding
DOCK4	ENSG00000128512	5.49179	1.30532	0.000458667	0.0123383	1	7	111726110	112206407	-	480298	11867	0.391764	0.421336	0.391015	protein_coding
RAB29	ENSG00000117280	4.28759	1.3093	0.000226206	0.00770775	1	1	205767986	205775482	-	7497	3899	0.460112	0.470121	0.449263	protein_coding
MYCL	ENSG00000116990	5.02073	1.31179	0.000830549	0.0185216	1	1	39895426	39902256	-	6831	5060	0.53675	0.550988	0.496045	protein_coding
REPS2	ENSG00000169891	3.27968	1.32423	5.88982e-06	0.000702533	1	X	16946658	17153272	+	206615	11317	0.40945	0.423434	0.408639	protein_coding
TOX	ENSG00000198846	2.79453	1.32877	0.00271909	0.0404238	1	8	58805412	59119147	-	313736	4067	0.375674	0.409639	0.375228	protein_coding
SLC4A7	ENSG00000033867	3.91759	1.33949	0.00191129	0.0322468	1	3	27372721	27484420	-	111700	9585	0.368481	0.363902	0.368911	protein_coding
FEM1C	ENSG00000145780	4.90039	1.34309	0.000295175	0.00902953	1	5	115520908	115544775	-	23868	5694	0.354297	0.376185	0.347439	protein_coding
ODC1	ENSG00000115758	4.5938	1.35077	0.00247754	0.0383134	1	2	10439968	10448327	-	8360	2778	0.455318	0.49892	0.433614	protein_coding
PTGES	ENSG00000148344	6.02797	1.35869	1.56194e-07	5.11353e-05	1	9	129738331	129753042	-	14712	1887	0.522602	0.568098	0.515908	protein_coding
NFKBIA	ENSG00000100906	7.86355	1.36992	0.00316997	0.044749	1	14	35401513	35404749	-	3237	2366	0.565513	0.56044	0.57931	protein_coding
TEC	ENSG00000135605	2.49404	1.38046	0.00075346	0.0173258	1	4	48135783	48269838	-	134056	3985	0.404327	0.429611	0.403552	protein_coding
NEFH	ENSG00000100285	2.29087	1.38667	0.0025907	0.0396024	1	22	29480218	29491390	+	11173	3791	0.528375	0.578475	0.502642	protein_coding
ANXA8L1	ENSG00000264230	4.85383	1.39688	0.00129337	0.0247526	1	10	46375627	46391784	+	16158	2848	0.540261	0.545295	0.539184	protein_coding
LTBP2	ENSG00000119681	8.42637	1.4029	0.000333809	0.00972788	1	14	74498183	74612378	-	114196	9042	0.516756	0.56879	0.512282	protein_coding
TSPAN5	ENSG00000168785	4.20936	1.40316	7.17445e-06	0.000794196	1	4	98470367	98658611	-	188245	7400	0.419227	0.457027	0.41768	protein_coding
AMIGO2	ENSG00000139211	4.38978	1.40343	0.000103633	0.00463293	1	12	47075707	47079959	-	4253	3961	0.446613	0.449634	0.405498	protein_coding
SLC9A9	ENSG00000181804	5.2264	1.40947	0.000184542	0.0067726	1	3	143265222	143848485	-	583264	4023	0.392749	0.44171	0.392409	protein_coding
ATP8B4	ENSG00000104043	4.89629	1.41332	0.00144695	0.0266127	1	15	49858238	50182817	-	324580	11022	0.38399	0.401198	0.383385	protein_coding
SLC25A25	ENSG00000148339	6.1438	1.41493	0.000433974	0.0118818	1	9	128068201	128109245	+	41045	5913	0.498977	0.576357	0.485953	protein_coding
SHTN1	ENSG00000187164	5.24556	1.42442	4.40785e-05	0.00265975	1	10	116881477	117126586	-	245110	8231	0.390908	0.411372	0.390197	protein_coding
GHR	ENSG00000112964	4.46722	1.43993	0.00135845	0.0256787	1	5	42423439	42721878	+	298440	6926	0.385044	0.436471	0.383822	protein_coding
GLA	ENSG00000102393	5.00102	1.44771	1.21234e-06	0.000255537	1	X	101393273	101408012	-	14740	6190	0.42798	0.437318	0.421219	protein_coding
LPCAT2	ENSG00000087253	5.10339	1.44772	0.000692202	0.0164366	1	16	55509072	55586666	+	77595	7345	0.354911	0.352212	0.355194	protein_coding
JPT1	ENSG00000189159	4.90458	1.45426	0.00140263	0.0262266	1	17	75135248	75168281	-	33034	3397	0.462689	0.530468	0.45492	protein_coding
IGF1	ENSG00000017427	6.68847	1.45647	0.00223825	0.0361721	1	12	102395874	102481744	-	85871	8107	0.396995	0.370297	0.399779	protein_coding
SGO2	ENSG00000163535	2.86222	1.4735	0.00298428	0.0430357	1	2	200510008	200584096	+	74089	6324	0.377389	0.373814	0.377723	protein_coding
GALNT12	ENSG00000119514	2.45181	1.47981	0.00276093	0.0406791	1	9	98807670	98850081	+	42412	3155	0.455141	0.477021	0.453383	protein_coding
MYEF2	ENSG00000104177	2.75899	1.48806	0.000427036	0.0117415	1	15	48134632	48178353	-	43722	13884	0.337847	0.348387	0.332942	protein_coding
BTG2	ENSG00000159388	8.41165	1.49213	7.64404e-07	0.000170462	1	1	203305491	203309602	+	4112	2755	0.533447	0.506715	0.587758	protein_coding
CITED2	ENSG00000164442	7.45861	1.50065	3.96182e-05	0.00246803	1	6	139371807	139374648	-	2842	2559	0.504752	0.489254	0.64539	protein_coding
LYVE1	ENSG00000133800	8.33863	1.50764	0.00111692	0.022554	1	11	10556966	10611689	-	54724	3508	0.434315	0.416477	0.435536	protein_coding
BCL2L11	ENSG00000153094	5.03975	1.51245	5.48401e-08	2.41093e-05	1	2	111119378	111168445	+	49068	6642	0.444189	0.468684	0.440354	protein_coding
HSPD1	ENSG00000144381	8.41655	1.51388	0.000101247	0.00458203	1	2	197486584	197516737	-	30154	7614	0.427884	0.422511	0.4297	protein_coding
TOB1	ENSG00000141232	4.71396	1.51468	0.000219857	0.00755121	1	17	50862223	50867978	-	5756	2517	0.501825	0.441001	0.549104	protein_coding
CYBB	ENSG00000165168	7.77999	1.51485	0.00212777	0.0347927	1	X	37780059	37813461	+	33403	4361	0.373301	0.408851	0.367963	protein_coding
GLIPR1	ENSG00000139278	5.07862	1.52619	0.00125915	0.0242485	1	12	75480753	75503863	+	23111	6203	0.377196	0.360148	0.383451	protein_coding
INAVA	ENSG00000163362	2.6546	1.52779	0.000624692	0.0155285	1	1	200891048	200915742	+	24695	5326	0.532275	0.592002	0.515851	protein_coding
ITGB6	ENSG00000115221	4.21107	1.5285	8.72858e-06	0.000915021	1	2	160099667	160200313	-	100647	5770	0.392634	0.410225	0.391564	protein_coding
MEX3B	ENSG00000183496	4.00487	1.5348	0.00112653	0.0226885	1	15	82041778	82046119	-	4342	4341	0.558166	0.558166	0	protein_coding
KCNE4	ENSG00000152049	2.86562	1.54041	0.0010033	0.0209283	1	2	223051814	223198399	+	146586	4119	0.399618	0.482399	0.397225	protein_coding
KLF11	ENSG00000172059	5.17747	1.5418	0.000250275	0.00821104	1	2	10042849	10054836	+	11988	4587	0.507967	0.495095	0.515946	protein_coding
ABCA1	ENSG00000165029	6.8674	1.54649	0.000356716	0.0101838	1	9	104781006	104928155	-	147150	11291	0.434159	0.453104	0.432584	protein_coding
RHPN2	ENSG00000131941	4.66847	1.55233	0.000686467	0.0163509	1	19	32978592	33064888	-	86297	4789	0.48329	0.481729	0.483382	protein_coding
AQP1	ENSG00000240583	4.36955	1.55316	0.00217968	0.0354158	1	7	30911853	30925517	+	13665	3255	0.563744	0.565899	0.56307	protein_coding
TNIK	ENSG00000154310	4.04604	1.55391	0.000819216	0.0184019	1	3	171058414	171460408	-	401995	11413	0.39524	0.419084	0.394543	protein_coding
NCOA7	ENSG00000111912	4.91952	1.56374	0.0023924	0.0375564	1	6	125781161	125932034	+	150874	7625	0.390461	0.405115	0.389681	protein_coding
PRR11	ENSG00000068489	4.20563	1.56419	0.000779791	0.017671	1	17	59155732	59206709	+	50978	6732	0.443514	0.436126	0.444638	protein_coding
ANK2	ENSG00000145362	2.31453	1.56979	0.000516072	0.0135508	1	4	112818032	113384221	+	566190	55073	0.370837	0.390663	0.368701	protein_coding
GADD45B	ENSG00000099860	7.56649	1.59434	0.00288691	0.0419857	1	19	2476122	2478259	+	2138	2137	0.602714	0.602714	0	protein_coding
SLC41A1	ENSG00000133065	4.62486	1.60853	0.00140625	0.0262597	1	1	205789094	205813748	-	24655	6365	0.508396	0.523802	0.503035	protein_coding
FOXI3	ENSG00000214336	3.53908	1.61223	6.99904e-05	0.00357788	1	2	88446787	88452693	-	5907	2839	0.504064	0.575907	0.437561	protein_coding
TRIM16	ENSG00000221926	4.92097	1.62188	0.00179947	0.0310758	1	17	15627960	15684311	-	56352	5625	0.456638	0.505067	0.451268	protein_coding
CELSR1	ENSG00000075275	2.10398	1.63082	0.0013529	0.0256052	1	22	46360834	46537620	-	176787	16008	0.539935	0.615942	0.532368	protein_coding
MARCHF3	ENSG00000173926	3.2505	1.63765	0.00322703	0.0450993	1	5	126867714	127030558	-	162845	4921	0.409324	0.484861	0.40697	protein_coding
DNAJB4	ENSG00000162616	5.61078	1.64798	8.33089e-06	0.000890191	1	1	77979175	78017964	+	38790	3695	0.370646	0.373207	0.370377	protein_coding
HILPDA	ENSG00000135245	4.00866	1.64881	0.000372917	0.0105479	1	7	128455849	128458418	+	2570	2068	0.515376	0.514507	0.518962	protein_coding
TSPYL2	ENSG00000184205	5.8016	1.65184	7.19913e-05	0.00365023	1	X	53082367	53088540	+	6174	4946	0.524704	0.532956	0.491443	protein_coding
PDK4	ENSG00000004799	8.29144	1.65246	0.000105664	0.00468546	1	7	95583499	95596516	-	13018	4535	0.360836	0.379493	0.350861	protein_coding
FRRS1	ENSG00000156869	4.86383	1.66561	1.70282e-06	0.000311921	1	1	99703970	99766635	-	62666	8605	0.382031	0.402789	0.378727	protein_coding
FAP	ENSG00000078098	5.09195	1.67744	3.35599e-05	0.00219537	1	2	162170684	162245151	-	74468	6937	0.367035	0.381145	0.365586	protein_coding
PRSS22	ENSG00000005001	3.62826	1.6875	1.41193e-05	0.00124145	1	16	2852730	2858170	-	5441	2376	0.593566	0.622896	0.570822	protein_coding
SLC12A2	ENSG00000064651	4.94472	1.69239	0.00185478	0.0315702	1	5	128083766	128189677	+	105912	10625	0.352381	0.385318	0.348708	protein_coding
CD180	ENSG00000134061	3.57019	1.69249	0.000348685	0.0100284	1	5	67179613	67196799	-	17187	5665	0.429652	0.438835	0.425137	protein_coding
GALNT3	ENSG00000115339	2.6169	1.69482	5.34504e-07	0.000124612	1	2	165747588	165794659	-	47072	4574	0.370525	0.400962	0.367249	protein_coding
PIWIL4	ENSG00000134627	2.46339	1.70152	0.000141342	0.0056489	1	11	94543840	94621421	+	77582	4475	0.402483	0.463017	0.398777	protein_coding
SDK1	ENSG00000146555	4.25969	1.7074	1.56223e-06	0.000293148	1	7	3301252	4269000	+	967749	12209	0.431228	0.571464	0.429436	protein_coding
KLF6	ENSG00000067082	9.17047	1.71058	2.08539e-05	0.00167125	1	10	3775996	3785281	-	9286	6135	0.480883	0.473513	0.495238	protein_coding
IQCN	ENSG00000130518	4.16041	1.71071	4.80809e-05	0.00281002	1	19	18257097	18274509	-	17413	9149	0.557949	0.595147	0.516761	protein_coding
CD163	ENSG00000177575	8.75586	1.71254	0.00241784	0.0377734	1	12	7470811	7503893	-	33083	5797	0.374252	0.440573	0.360161	protein_coding
CTSV	ENSG00000136943	4.75245	1.71754	0.000409544	0.0113748	1	9	97029677	97156556	-	126880	7313	0.431285	0.438808	0.430825	protein_coding
CD109	ENSG00000156535	4.41092	1.71967	2.22571e-05	0.00173217	1	6	73695785	73828316	+	132532	9747	0.385797	0.392326	0.385278	protein_coding
TRIB1	ENSG00000173334	6.89404	1.73966	0.000265979	0.00850633	1	8	125430358	125438403	+	8046	4094	0.513114	0.521739	0.504176	protein_coding
MRC1	ENSG00000260314	7.44882	1.74355	0.00152208	0.0275532	1	10	17809348	17911164	+	101817	5158	0.392227	0.425165	0.390469	protein_coding
GADD45A	ENSG00000116717	5.49182	1.7478	0.00041743	0.0115314	1	1	67685201	67688334	+	3134	1922	0.526652	0.578044	0.445087	protein_coding
ADRA2B	ENSG00000274286	1.70168	1.7514	0.00308936	0.0438929	1	2	96112876	96116571	-	3696	3695	0.611637	0.611637	0	protein_coding
CCNL1	ENSG00000163660	8.19786	1.75394	6.20966e-06	0.000713045	1	3	157146508	157160760	-	14253	8722	0.37293	0.383513	0.356239	protein_coding
PHLDA1	ENSG00000139289	6.19048	1.78876	0.000232843	0.00784162	1	12	76025447	76031776	-	6330	5911	0.441144	0.429538	0.605263	protein_coding
ACSM3	ENSG00000005187	2.506	1.78891	0.000432311	0.0118573	1	16	20610243	20797581	+	187339	7486	0.410755	0.420385	0.410354	protein_coding
OSR2	ENSG00000164920	3.91754	1.8003	1.3319e-05	0.00117797	1	8	98944403	98952104	+	7702	2924	0.510193	0.541724	0.490894	protein_coding
SH3TC1	ENSG00000125089	5.71248	1.80686	1.32756e-10	2.55339e-07	1	4	8182072	8241803	+	59732	10577	0.574844	0.622483	0.564593	protein_coding
ITGB8	ENSG00000105855	4.93228	1.80988	0.00184693	0.0315702	1	7	20330702	20415754	+	85053	15142	0.374359	0.390767	0.370805	protein_coding
DNAJA4	ENSG00000140403	4.95887	1.83428	9.12707e-05	0.00426864	1	15	78264086	78282196	+	18111	6582	0.47079	0.49605	0.456367	protein_coding
PPP1R15A	ENSG00000087074	8.63127	1.84469	0.000103859	0.00463293	1	19	48872421	48876058	+	3638	3063	0.567776	0.575579	0.526132	protein_coding
BAG3	ENSG00000151929	6.73685	1.85648	0.00011997	0.00503274	1	10	119651380	119677819	+	26440	2731	0.49756	0.564628	0.489835	protein_coding
CCSER1	ENSG00000184305	2.02378	1.877	0.000143053	0.00567308	1	4	90127535	91601913	+	1474379	10446	0.351555	0.379092	0.351359	protein_coding
ZC3H12C	ENSG00000149289	3.66323	1.88534	3.0737e-07	8.67486e-05	1	11	110093392	110171841	+	78450	9681	0.372306	0.369073	0.372761	protein_coding
ZFAND2A	ENSG00000178381	4.51199	1.89285	0.00190203	0.0321964	1	7	1152071	1160759	-	8689	2275	0.548573	0.527473	0.556058	protein_coding
VTN	ENSG00000109072	4.47995	1.89535	0.00324201	0.0452264	1	17	28367284	28373091	-	5808	1896	0.596521	0.590717	0.599335	protein_coding
PHGDH	ENSG00000092621	4.62568	1.91231	1.2899e-08	9.77341e-06	1	1	119648411	119744218	+	95808	9163	0.437839	0.517734	0.429389	protein_coding
FN1	ENSG00000115414	12.6243	1.91429	7.56244e-05	0.00374778	1	2	215360440	215436073	-	75634	17175	0.393902	0.443377	0.379366	protein_coding
ATF3	ENSG00000162772	8.06461	1.91879	0.00235712	0.0372371	1	1	212565334	212620777	+	55444	4035	0.431596	0.502354	0.426043	protein_coding
USP31	ENSG00000103404	5.05134	1.96605	9.04599e-06	0.000924049	1	16	23061406	23149452	-	88047	12183	0.414601	0.454486	0.408196	protein_coding
NECAB1	ENSG00000123119	1.79617	1.97174	0.00378379	0.0497616	1	8	90791741	90959393	+	167653	6187	0.370082	0.340553	0.371214	protein_coding
FGF7	ENSG00000140285	5.81827	1.97268	0.000399682	0.0111614	1	15	49423237	49488775	+	65539	6511	0.338323	0.326985	0.339573	protein_coding
JUNB	ENSG00000171223	8.92618	1.97765	0.000438445	0.0119616	1	19	12791486	12793315	+	1830	1829	0.648442	0.648442	0	protein_coding
ALOX5AP	ENSG00000132965	3.86032	1.97876	0.00186847	0.0316734	1	13	30713478	30764426	+	50949	1673	0.456603	0.494322	0.455322	protein_coding
HCAR1	ENSG00000196917	1.54357	2.01312	0.000851117	0.0186821	1	12	122726076	122730844	-	4769	4768	0.489513	0.489513	0	protein_coding
VNN1	ENSG00000112299	2.54281	2.02634	0.00262776	0.0397398	1	6	132680849	132714055	-	33207	3846	0.381136	0.394176	0.379428	protein_coding
RNF122	ENSG00000133874	2.82761	2.02667	0.00080454	0.0181517	1	8	33547754	33567128	-	19375	1866	0.490761	0.549303	0.484521	protein_coding
XCR1	ENSG00000173578	1.72698	2.02909	0.00241807	0.0377734	1	3	46016990	46085825	-	68836	5689	0.415225	0.496924	0.407864	protein_coding
ENPP5	ENSG00000112796	1.83096	2.03006	0.00361092	0.0483083	1	6	46159185	46170980	-	11796	4270	0.384146	0.376112	0.388704	protein_coding
SIX4	ENSG00000100625	2.41112	2.03017	0.000238426	0.00792369	1	14	60709539	60724351	-	14813	6766	0.440859	0.429057	0.450783	protein_coding
LXN	ENSG00000079257	4.51688	2.03386	0.000267072	0.00850633	1	3	158645822	158672648	-	26827	1452	0.36912	0.410468	0.366753	protein_coding
PGM2L1	ENSG00000165434	2.64796	2.03839	6.14539e-06	0.000710971	1	11	74330316	74398433	-	68118	8768	0.374503	0.38766	0.372559	protein_coding
DUSP10	ENSG00000143507	3.20622	2.04079	0.000590945	0.0149063	1	1	221701424	221742089	-	40666	2821	0.413181	0.445587	0.410765	protein_coding
DNAH8	ENSG00000124721	1.55103	2.04371	0.00157999	0.0282461	1	6	38715311	39030792	+	315482	15254	0.391066	0.40632	0.390291	protein_coding
KCNJ14	ENSG00000182324	1.094	2.04906	0.0025564	0.039296	1	19	48455574	48466980	+	11407	4272	0.522795	0.544944	0.509532	protein_coding
IER3	ENSG00000137331	6.35534	2.07003	0.000650017	0.0158507	1	6	30743199	30744548	-	1350	1349	0.585619	0.585619	0	protein_coding
ENSG00000235609	ENSG00000235609	1.14902	2.0728	0.00286884	0.041802	1	21	14818843	15014430	-	195588	5925	0.377106	0.342616	0.378183	lncRNA
COMP	ENSG00000105664	3.41186	2.08045	0.000154439	0.00597074	1	19	18782773	18791305	-	8533	3074	0.628575	0.627521	0.629168	protein_coding
ENSG00000280206	ENSG00000280206	1.30058	2.08125	0.00165335	0.029208	1	16	15701237	15702118	+	882	881	0.407491	0.407491	0	lncRNA
IGFBPL1	ENSG00000137142	0.900833	2.08362	0.00132458	0.0252243	1	9	38406528	38424454	-	17927	3561	0.492134	0.509407	0.487852	protein_coding
PRR15	ENSG00000176532	2.46369	2.08922	0.000191425	0.00693048	1	7	29563835	29567293	+	3459	1953	0.563621	0.559652	0.568771	protein_coding
ENSG00000279520	ENSG00000279520	2.71477	2.1248	0.000239906	0.00795567	1	16	2516658	2517999	+	1342	1341	0.546607	0.546607	0	TEC
HSPH1	ENSG00000120694	6.80962	2.12724	0.000120037	0.00503274	1	13	31134973	31162388	-	27416	8374	0.368156	0.379986	0.362954	protein_coding
CHST15	ENSG00000182022	3.87823	2.12896	0.00346928	0.0474927	1	10	124007668	124093598	-	85931	6534	0.502362	0.513315	0.501461	protein_coding
LINGO2	ENSG00000174482	1.24135	2.13218	0.00233107	0.0369856	1	9	27948078	28670286	-	722209	3472	0.362092	0.449021	0.361672	protein_coding
SPTA1	ENSG00000163554	2.51028	2.16659	0.00186908	0.0316734	1	1	158610704	158686715	-	76012	10055	0.375511	0.45271	0.363742	protein_coding
PLAUR	ENSG00000011422	4.91925	2.20065	0.00246883	0.0382556	1	19	43646095	43670547	-	24453	4447	0.499427	0.526647	0.493377	protein_coding
TREM2	ENSG00000095970	2.91598	2.20795	0.0010842	0.0221548	1	6	41158506	41163186	-	4681	1090	0.542308	0.573394	0.532869	protein_coding
CKS2	ENSG00000123975	3.39987	2.20915	2.85924e-05	0.00200891	1	9	89311195	89316703	+	5509	613	0.384168	0.412724	0.380592	protein_coding
ABI3BP	ENSG00000154175	6.14755	2.23472	0.000713653	0.0167109	1	3	100749156	100993515	-	244360	10909	0.37023	0.402878	0.368704	protein_coding
FREM1	ENSG00000164946	4.01385	2.24161	7.37561e-05	0.00370877	1	9	14737152	14910995	-	173844	8233	0.394304	0.467752	0.390653	protein_coding
RBP7	ENSG00000162444	1.8771	2.25348	0.000134285	0.00548077	1	1	9997206	10016021	+	18816	857	0.483285	0.513419	0.481847	protein_coding
TRABD2A	ENSG00000186854	1.35914	2.25718	0.00262991	0.0397398	1	2	84821650	84907008	-	85359	8757	0.459805	0.464771	0.459237	protein_coding
ZFP36	ENSG00000128016	8.30094	2.2657	2.96499e-05	0.00204691	1	19	39406847	39409412	+	2566	1973	0.591033	0.582362	0.619932	protein_coding
RGS2	ENSG00000116741	6.13421	2.27387	0.000156469	0.0059915	1	1	192809039	192812275	+	3237	2083	0.407911	0.409506	0.40503	protein_coding
TNFRSF10D	ENSG00000173530	3.82395	2.27431	0.00075442	0.0173258	1	8	23135588	23164027	-	28440	3526	0.452899	0.470221	0.450448	protein_coding
HBEGF	ENSG00000113070	4.83214	2.34018	5.54686e-06	0.000682796	1	5	140332843	140346603	-	13761	2984	0.499346	0.497654	0.499814	protein_coding
FLRT2	ENSG00000185070	1.72096	2.3403	0.000312443	0.00931141	1	14	85530144	85654428	+	124285	38097	0.393325	0.383626	0.397612	protein_coding
EIF4A1	ENSG00000161960	5.05993	2.34549	2.18325e-05	0.00172275	1	17	7572824	7579006	+	6183	5193	0.526367	0.515309	0.584429	protein_coding
TENT5C	ENSG00000183508	3.1509	2.34841	6.60663e-05	0.00344597	1	1	117606048	117628389	+	22342	5652	0.439595	0.439667	0.439571	protein_coding
DNAJB1	ENSG00000132002	8.36798	2.35269	0.000196007	0.00706314	1	19	14514769	14560391	-	45623	8178	0.520801	0.55686	0.512926	protein_coding
GAS1	ENSG00000180447	5.80351	2.35647	1.29174e-05	0.00116229	1	9	86944362	86947506	-	3145	3144	0.59701	0.59701	0	protein_coding
HSPE1	ENSG00000115541	3.70792	2.3663	0.000218848	0.00753338	1	2	197500140	197503449	+	3310	1821	0.439408	0.471719	0.399866	protein_coding
FOS	ENSG00000170345	10.8968	2.38411	2.92817e-05	0.00204691	1	14	75278826	75282230	+	3405	3183	0.540247	0.535344	0.61086	protein_coding
DDIT3	ENSG00000175197	4.82783	2.41085	5.91461e-07	0.000135833	1	12	57516588	57521737	-	5150	1303	0.515634	0.486569	0.525481	protein_coding
SOCS3	ENSG00000184557	8.49976	2.41589	0.00263389	0.0397398	1	17	78356778	78360077	-	3300	2732	0.622613	0.599927	0.731922	protein_coding
DAPK2	ENSG00000035664	2.41419	2.42364	2.41212e-05	0.00179159	1	15	63907036	64072033	-	164998	13592	0.468899	0.503973	0.465751	protein_coding
NOCT	ENSG00000151014	3.87791	2.4299	3.29818e-06	0.000461356	1	4	139015781	139045939	+	30159	2509	0.448206	0.526505	0.441101	protein_coding
PTGER4	ENSG00000171522	4.03686	2.44443	0.000835651	0.0185812	1	5	40679915	40693735	+	13821	3540	0.419609	0.493785	0.394066	protein_coding
PMAIP1	ENSG00000141682	5.55703	2.4471	5.64847e-12	2.74723e-08	1	18	59899996	59904305	+	4310	2183	0.396148	0.400366	0.391816	protein_coding
CCL2	ENSG00000108691	5.63639	2.46334	0.000679429	0.016313	1	17	34255218	34257203	+	1986	1985	0.459446	0.459446	0	protein_coding
CORO2A	ENSG00000106789	3.11638	2.46376	2.48661e-05	0.00182198	1	9	98120975	98192637	-	71663	5701	0.49153	0.507455	0.490153	protein_coding
WNT4	ENSG00000162552	1.66422	2.47131	0.000730183	0.016928	1	1	22117313	22143969	-	26657	4643	0.577093	0.580444	0.576387	protein_coding
SYPL2	ENSG00000143028	2.11641	2.48192	0.00289727	0.0420966	1	1	109466546	109482134	+	15589	4036	0.492751	0.54559	0.47429	protein_coding
ENSG00000263786	ENSG00000263786	0.125052	2.48539	0.00302381	0.0433215	1	17	75145261	75146546	-	1286	715	0.441245	0.412587	0.477193	lncRNA
KLF4	ENSG00000136826	8.5658	2.48754	3.43401e-08	1.7613e-05	1	9	107484852	107490482	-	5631	3657	0.569449	0.583538	0.543335	protein_coding
MMP19	ENSG00000123342	5.92899	2.48769	4.05703e-07	0.000105806	1	12	55835433	55842966	-	7534	4666	0.510288	0.516502	0.500174	protein_coding
CDRT1	ENSG00000241322	2.76617	2.50624	0.00177409	0.0307063	1	17	15565483	15619704	-	54222	8967	0.434112	0.434928	0.433951	protein_coding
IFRD1	ENSG00000006652	4.18346	2.5148	1.17295e-05	0.00110725	1	7	112422887	112481017	+	58131	7881	0.394581	0.403121	0.393242	protein_coding
F2RL1	ENSG00000164251	2.7499	2.51781	9.09845e-06	0.000924049	1	5	76818933	76835315	+	16383	2927	0.446893	0.449607	0.446302	protein_coding
KRT17	ENSG00000128422	2.71313	2.52377	0.00149773	0.0271443	1	17	41619442	41624842	-	5401	2988	0.586852	0.590361	0.582504	protein_coding
ADAMTSL4.AS1	ENSG00000203804	0.976369	2.5391	0.000135282	0.00550682	1	1	150560202	150562115	-	1914	1913	0.582854	0.582854	0	lncRNA
SOWAHB	ENSG00000186212	2.14016	2.53979	2.54805e-05	0.00185815	1	4	76894152	76898144	-	3993	3992	0.558868	0.558868	0	protein_coding
C5AR1	ENSG00000197405	4.8458	2.53997	0.000199298	0.00711507	1	19	47290023	47322066	+	32044	2956	0.496926	0.519959	0.494585	protein_coding
JUN	ENSG00000177606	10.3213	2.55729	3.51101e-05	0.00227949	1	1	58776845	58784048	-	7204	3620	0.47036	0.549724	0.390176	protein_coding
NKX3.1	ENSG00000167034	0.720669	2.56786	0.00052681	0.0137194	1	8	23678697	23682938	-	4242	3276	0.493751	0.470696	0.572021	protein_coding
SOX4	ENSG00000124766	6.18446	2.56815	2.24357e-08	1.43841e-05	1	6	21593751	21598619	+	4869	4868	0.525062	0.525062	0	protein_coding
CHST1	ENSG00000175264	2.15821	2.56826	0.00119898	0.0236219	1	11	45647689	45665622	-	17934	4662	0.564434	0.592664	0.554517	protein_coding
SOD2	ENSG00000112096	8.14178	2.57497	0.000260755	0.00848254	1	6	159669069	159762529	-	93461	18133	0.423047	0.436442	0.419823	protein_coding
FUT9	ENSG00000172461	2.11082	2.58024	0.00124927	0.0241793	1	6	96015974	96215612	+	199639	13724	0.352177	0.347129	0.35255	protein_coding
OTUD1	ENSG00000165312	5.64957	2.58849	1.87468e-08	1.27579e-05	1	10	23439075	23442377	+	3303	3302	0.532707	0.532707	0	protein_coding
ISLR	ENSG00000129009	3.99114	2.59527	0.000575938	0.0146227	1	15	74173710	74176872	+	3163	2627	0.610373	0.607156	0.626168	protein_coding
NFKBIZ	ENSG00000144802	7.26429	2.59908	4.02918e-08	1.8787e-05	1	3	101827991	101861022	+	33032	5888	0.402319	0.46892	0.387872	protein_coding
SPP1	ENSG00000118785	10.7286	2.60293	1.28836e-06	0.000260843	1	4	87975667	87983532	+	7866	7247	0.361221	0.365807	0.307443	protein_coding
H2BC15	ENSG00000233822	0.885038	2.62263	0.00274431	0.0406791	1	6	27837760	27855709	+	17950	5419	0.393337	0.424802	0.379729	protein_coding
DKK1	ENSG00000107984	4.29407	2.67509	0.00212384	0.0347655	1	10	52314281	52318042	+	3762	2215	0.433129	0.443792	0.417853	protein_coding
LINC00884	ENSG00000233058	0.837954	2.67828	0.00318859	0.0448472	1	3	194487140	194521156	+	34017	9416	0.45217	0.480353	0.441382	lncRNA
ADAMTS7P3	ENSG00000261143	2.69107	2.70084	0.00111176	0.0224792	1	15	77976042	77993057	+	17016	3743	0.615398	0.653754	0.604581	transcribed_unprocessed_pseudogene
PDE1B	ENSG00000123360	2.07544	2.70348	0.000442583	0.0120106	1	12	54549601	54579239	+	29639	7350	0.492948	0.527755	0.48147	protein_coding
RGS16	ENSG00000143333	4.90008	2.72187	9.27187e-08	3.84602e-05	1	1	182598623	182604389	-	5767	2403	0.507978	0.531835	0.490931	protein_coding
SLC38A4	ENSG00000139209	2.1651	2.72441	0.00125911	0.0242485	1	12	46764761	46832408	-	67648	4126	0.365604	0.381241	0.364588	protein_coding
MT.TP	ENSG00000210196	1.84232	2.74212	0.00377506	0.0497386	1	MT	15956	16023	-	68	67	0.343284	0.343284	0	Mt_tRNA
B3GNT7	ENSG00000156966	2.10565	2.77923	0.000385597	0.0108468	1	2	231395710	231401164	+	5455	3636	0.627246	0.605886	0.669967	protein_coding
PTGIS	ENSG00000124212	1.50538	2.81016	0.00118315	0.0234301	1	20	49503874	49568137	-	64264	5560	0.461603	0.516187	0.456433	protein_coding
RN7SL600P	ENSG00000274963	1.50705	2.81753	0.00109791	0.0223164	1	1	150568971	150569269	-	299	298	0.510067	0.510067	0	misc_RNA
DDIT4L	ENSG00000145358	0.974234	2.88414	0.00259168	0.0396024	1	4	100185870	100190782	-	4913	2991	0.430578	0.438984	0.417491	protein_coding
LOX	ENSG00000113083	3.35889	2.9064	0.000266334	0.00850633	1	5	122063195	122078413	-	15219	5587	0.380208	0.407016	0.364656	protein_coding
DUOXA1	ENSG00000140254	0.69799	2.92897	0.00044496	0.0120539	1	15	45117366	45129938	-	12573	3713	0.492046	0.570159	0.459307	protein_coding
MAB21L3	ENSG00000173212	2.32365	2.93143	0.000259737	0.00846732	1	1	116111399	116138149	+	26751	6622	0.430019	0.439142	0.427017	protein_coding
ENSG00000173727	ENSG00000173727	2.23832	2.98393	4.49108e-07	0.000111458	1	11	65455258	65466720	+	11463	1768	0.468505	0.468891	0.468434	transcribed_unprocessed_pseudogene
PRDM1	ENSG00000057657	3.69616	2.99805	0.00119881	0.0236219	1	6	105993463	106109939	+	116477	6738	0.403663	0.452657	0.400654	protein_coding
TNFSF9	ENSG00000125657	0.999811	3.00507	0.000680636	0.016313	1	19	6531026	6535924	+	4899	1631	0.592078	0.570815	0.602694	protein_coding
RHPN1	ENSG00000158106	3.77158	3.02547	2.76605e-07	8.03043e-05	1	8	143368876	143384221	+	15346	4171	0.649788	0.669384	0.642474	protein_coding
ENSG00000279838	ENSG00000279838	0.377047	3.05504	0.00262867	0.0397398	1	1	185292384	185294372	-	1989	1988	0.40996	0.40996	0	TEC
SMAD1	ENSG00000170365	5.42781	3.08748	4.93107e-06	0.000621921	1	4	145481194	145559176	+	77983	7080	0.38355	0.427542	0.379157	protein_coding
MLF1	ENSG00000178053	1.44842	3.1039	9.74815e-08	3.84602e-05	1	3	158571163	158607252	+	36090	3721	0.375073	0.379199	0.374598	protein_coding
CCN4	ENSG00000104415	1.19116	3.10924	0.00328578	0.0455386	1	8	133191039	133231690	+	40652	5185	0.481243	0.452652	0.485423	protein_coding
HSPA1A	ENSG00000204389	7.90274	3.11479	1.18999e-05	0.00111261	1	6	31815543	31817946	+	2404	2403	0.598002	0.598002	0	protein_coding
PRRG3	ENSG00000130032	2.89215	3.12579	0.00272255	0.0404361	1	X	151694607	151705924	+	11318	6517	0.517363	0.506675	0.531875	protein_coding
LOXHD1	ENSG00000167210	3.25934	3.12821	0.00227037	0.0364277	1	18	46476972	46657220	-	180249	9164	0.453875	0.538193	0.449358	protein_coding
TIPARP	ENSG00000163659	4.39925	3.15021	5.67187e-10	8.72731e-07	1	3	156673235	156706770	+	33536	4789	0.382734	0.449781	0.371565	protein_coding
MYRF	ENSG00000124920	2.45116	3.15342	2.35161e-05	0.00177374	1	11	61752636	61788518	+	35883	10749	0.599353	0.595776	0.600883	protein_coding
FOSL1	ENSG00000175592	2.25705	3.21064	9.19597e-05	0.00428783	1	11	65892049	65900573	-	8525	1883	0.556546	0.593733	0.546002	protein_coding
ADAMTS17	ENSG00000140470	0.871758	3.23107	0.00233398	0.0369856	1	15	99971437	100342005	-	370569	8363	0.466084	0.557336	0.463978	protein_coding
GPRC5A	ENSG00000013588	4.458	3.23645	4.2474e-07	0.000108925	1	12	12891559	12917937	+	26379	7659	0.463227	0.485311	0.454191	protein_coding
CLGN	ENSG00000153132	-0.225082	3.27509	0.00185434	0.0315702	1	4	140388453	140427661	-	39209	2806	0.358651	0.370278	0.357755	protein_coding
CXCL2	ENSG00000081041	3.65304	3.28193	0.000638413	0.0156921	1	4	74097040	74099196	-	2157	1396	0.476345	0.487822	0.455263	protein_coding
NR4A3	ENSG00000119508	3.0096	3.29499	2.42185e-05	0.00179159	1	9	99821855	99866891	+	45037	6305	0.429945	0.4636	0.424466	protein_coding
KRT16P6	ENSG00000226145	2.07022	3.29709	5.53386e-05	0.00304106	1	17	16817983	16822579	-	4597	1900	0.551784	0.59	0.524852	transcribed_unprocessed_pseudogene
EGR3	ENSG00000179388	2.54197	3.31011	0.000118942	0.00503274	1	8	22687659	22693480	-	5822	5028	0.563821	0.543755	0.691047	protein_coding
ADAMTS4	ENSG00000158859	2.54446	3.33237	0.00244424	0.0379511	1	1	161184302	161199054	-	14753	10330	0.514778	0.514618	0.515152	protein_coding
ENSG00000261270	ENSG00000261270	0.117638	3.34354	0.000701649	0.0165389	1	16	56940278	56941342	+	1065	599	0.476504	0.444073	0.51828	lncRNA
FOSB	ENSG00000125740	9.92951	3.35039	1.50679e-05	0.00130989	1	19	45467995	45475179	+	7185	5550	0.575724	0.568288	0.600979	protein_coding
ARC	ENSG00000198576	1.94782	3.37923	2.99695e-08	1.7613e-05	1	8	142611049	142614479	-	3431	2990	0.667638	0.667559	0.668182	protein_coding
EGR1	ENSG00000120738	8.98656	3.45859	2.70015e-06	0.000411359	1	5	138465479	138469303	+	3825	3135	0.565115	0.55311	0.619739	protein_coding
RN7SL473P	ENSG00000277452	1.36506	3.47782	4.87603e-05	0.00281002	1	1	150566562	150566860	-	299	298	0.530201	0.530201	0	misc_RNA
SCNN1G	ENSG00000166828	0.372731	3.5002	0.00196271	0.0328114	1	16	23182745	23216883	+	34139	3464	0.474955	0.521363	0.469714	protein_coding
NRIP3	ENSG00000175352	1.22846	3.57546	4.84037e-05	0.00281002	1	11	8980576	9004049	-	23474	4117	0.42943	0.470488	0.420696	protein_coding
RSPO2	ENSG00000147655	3.76643	3.582	3.17242e-07	8.71679e-05	1	8	107899316	108083642	-	184327	4344	0.37744	0.472836	0.375138	protein_coding
TNF	ENSG00000232810	2.69653	3.5848	0.000245352	0.00808402	1	6	31575565	31578336	+	2772	1674	0.528329	0.543011	0.505925	protein_coding
SLC6A10P	ENSG00000214617	1.15958	3.59887	3.07364e-05	0.00208344	1	16	32877469	32885501	-	8033	4467	0.621514	0.618984	0.624684	transcribed_unprocessed_pseudogene
DYRK3	ENSG00000143479	1.7697	3.62526	1.2757e-06	0.000260843	1	1	206635536	206684419	+	48884	10291	0.444633	0.448936	0.443486	protein_coding
PTP4A1	ENSG00000112245	-0.0790565	3.75103	0.0018198	0.0313213	1	6	63521746	63583588	+	61843	5901	0.39415	0.399593	0.393575	protein_coding
MIR616	ENSG00000208028	1.84819	3.7595	3.82568e-06	0.000525587	1	12	57519163	57519259	-	97	96	0.40625	0.40625	0	miRNA
FAAH2	ENSG00000165591	0.327209	3.79119	0.000669214	0.0161532	1	X	57286706	57489193	+	202488	2004	0.376607	0.454092	0.375832	protein_coding
TAGAP	ENSG00000164691	2.98234	3.81284	1.9161e-05	0.00157663	1	6	159034468	159045152	-	10685	4079	0.424186	0.470704	0.395458	protein_coding
EGR2	ENSG00000122877	2.99757	3.82194	4.82709e-05	0.00281002	1	10	62811996	62919900	-	107905	4052	0.426407	0.535538	0.422149	protein_coding
ENSG00000256006	ENSG00000256006	0.148914	3.92708	0.00155358	0.0279263	1	11	18405609	18406731	+	1123	268	0.434938	0.347015	0.462529	lncRNA
RPL13P5	ENSG00000240370	0.106332	4.11465	0.000321754	0.00952082	1	12	6873389	6884741	+	11353	1779	0.487051	0.591906	0.467565	transcribed_processed_pseudogene
CCL4L2	ENSG00000276070	2.42212	4.16267	0.00262067	0.0397398	1	17	36210924	36212878	+	1955	1395	0.490276	0.509677	0.44186	protein_coding
CCL3	ENSG00000277632	4.83142	4.1736	3.9234e-06	0.000534242	1	17	36088256	36090169	-	1914	1492	0.522216	0.50067	0.598575	protein_coding
CHI3L2	ENSG00000064886	2.3503	4.19173	0.00115455	0.0231618	1	1	111200771	111243440	+	42670	3280	0.446343	0.466159	0.444693	protein_coding
NR4A2	ENSG00000153234	4.39925	4.22053	3.09834e-08	1.7613e-05	1	2	156324437	156342348	-	17912	3953	0.45151	0.490514	0.440464	protein_coding
SDS	ENSG00000135094	1.54194	4.22889	0.00017954	0.00664081	1	12	113392445	113426301	-	33857	2996	0.500502	0.567423	0.494005	protein_coding
CD69	ENSG00000110848	1.62949	4.23068	0.00144166	0.0265982	1	12	9752486	9760901	-	8416	2828	0.353417	0.344059	0.358153	protein_coding
CCL4	ENSG00000275302	4.0297	4.31892	1.76993e-05	0.00148819	1	17	36103827	36105621	+	1795	1794	0.485507	0.485507	0	protein_coding
HSD3BP5	ENSG00000198857	1.83378	4.49572	0.000599533	0.0150982	1	1	119601340	119609250	+	7911	1129	0.457901	0.504872	0.450081	transcribed_unprocessed_pseudogene
IL24	ENSG00000162892	0.357771	4.6027	0.00134742	0.0255329	1	1	206897443	206904139	+	6697	1972	0.484618	0.472617	0.489627	protein_coding
ABCA9.AS1	ENSG00000231749	0.00215239	4.6327	0.000142436	0.00566322	1	17	68944531	69042784	+	98254	2976	0.379418	0.389449	0.379105	lncRNA
UPK1B	ENSG00000114638	0.423199	4.73197	0.000653436	0.0159089	1	3	119173517	119205143	+	31627	2247	0.418769	0.453939	0.41608	protein_coding
RPL7P19	ENSG00000241458	-0.213675	4.81292	0.00225824	0.0363468	1	5	138473744	138474361	+	618	617	0.411669	0.411669	0	processed_pseudogene
IL1R2	ENSG00000115590	1.34304	4.81987	0.000258779	0.00845399	1	2	101991960	102028544	+	36585	2945	0.446288	0.458744	0.445198	protein_coding
CD83	ENSG00000112149	4.11496	4.82745	3.42544e-08	1.7613e-05	1	6	14117256	14136918	+	19663	2378	0.451734	0.46005	0.45059	protein_coding
PRG2	ENSG00000186652	-0.30575	4.84577	0.000205119	0.0072306	1	11	57386780	57390650	-	3871	1840	0.510078	0.524457	0.497044	protein_coding
FAM71A	ENSG00000162771	0.530003	4.91965	0.00011607	0.00496101	1	1	212624474	212626775	+	2302	2301	0.554542	0.554542	0	protein_coding
RASD1	ENSG00000108551	2.39924	5.0045	1.31872e-08	9.77341e-06	1	17	17494437	17496395	-	1959	1746	0.629213	0.616266	0.735849	protein_coding
CXCL8	ENSG00000169429	4.624	5.00549	0.000205353	0.0072306	1	4	73740541	73743716	+	3176	2236	0.31937	0.320662	0.316294	protein_coding
CD5L	ENSG00000073754	0.720773	5.02604	0.000995499	0.0208405	1	1	157830911	157898256	-	67346	2461	0.396882	0.488826	0.393394	protein_coding
ZP2	ENSG00000103310	1.86273	5.04597	2.86054e-06	0.000418321	1	16	21197450	21214510	-	17061	3435	0.449883	0.483261	0.441468	protein_coding
RGS1	ENSG00000090104	3.7894	5.05601	0.000138483	0.00557423	1	1	192575763	192580024	+	4262	4071	0.337949	0.340457	0.284211	protein_coding
OGN	ENSG00000106809	1.67428	5.08563	1.03596e-05	0.00101531	1	9	92383268	92404696	-	21429	4013	0.366856	0.318963	0.377893	protein_coding
MEP1A	ENSG00000112818	-0.686238	5.33784	0.00143005	0.026466	1	6	46793389	46839778	+	46390	3076	0.381233	0.459688	0.375661	protein_coding
RND1	ENSG00000172602	0.22213	5.39013	0.000346219	0.00999488	1	12	48857145	48865870	-	8726	3944	0.520802	0.52789	0.514955	protein_coding
TAC3	ENSG00000166863	2.95202	5.47024	0.00126952	0.0244177	1	12	57010000	57028883	-	18884	1560	0.47556	0.511538	0.47232	protein_coding
PRND	ENSG00000171864	-0.0676225	5.48946	9.59811e-05	0.0044126	1	20	4721909	4728460	+	6552	3979	0.463593	0.454888	0.477061	protein_coding
MIR3153	ENSG00000265112	-0.320533	5.55477	3.19371e-05	0.00214592	1	9	89312225	89312306	+	82	81	0.395062	0.395062	0	miRNA
ENSG00000285646	ENSG00000285646	-0.32186	5.56179	2.70099e-05	0.00193303	1	1	11907940	11914298	+	6359	3068	0.494495	0.491525	0.497264	lncRNA
CHRNA1	ENSG00000138435	0.883383	5.59435	3.80156e-06	0.000525587	1	2	174747592	174787935	-	40344	4965	0.444513	0.461027	0.442196	protein_coding
MISP	ENSG00000099812	0.180309	5.85328	8.09655e-06	0.0008712	1	19	751112	764318	+	13207	2974	0.566258	0.627774	0.548378	protein_coding
NR5A2	ENSG00000116833	0.438347	5.89619	8.84572e-07	0.000191703	1	1	200027614	200177420	+	149807	7531	0.407	0.422387	0.406185	protein_coding
HSPA6	ENSG00000173110	5.41344	6.21281	1.13597e-06	0.000242766	1	1	161524540	161526894	+	2355	2354	0.586661	0.586661	0	protein_coding
DUSP2	ENSG00000158050	2.00662	6.46916	1.69765e-06	0.000311921	1	2	96143169	96145440	-	2272	1925	0.636724	0.635844	0.641618	protein_coding
CXCL3	ENSG00000163734	1.02489	7.42693	4.27822e-06	0.00056264	1	4	74036589	74038807	-	2219	2218	0.476105	0.476105	0	protein_coding

## Sheet: DEGs SB vs iSB
Ensembl ID	geneId	avgLog2CPM	avgLog2FC	P.Value	FDR	DE	chromosome	startPos	endPos	geneStrand	geneLength	exonLength	geneGC	exonGC	intronGC	geneType
CSHL1	ENSG00000204414	4.15846	-6.5969	4.84452e-05	0.0279287	-1	17	63909597	63918838	-	9242	1815	0.530137	0.567493	0.521007	protein_coding
PSG1	ENSG00000231924	6.70513	-5.94109	5.97423e-05	0.0295212	-1	19	42866464	42879822	-	13359	4953	0.457554	0.442762	0.46627	protein_coding
ALPP	ENSG00000163283	5.65418	-5.63805	0.000137125	0.0395263	-1	2	232378724	232382889	+	4166	2859	0.622809	0.613851	0.64242	protein_coding
PSG9	ENSG00000183668	6.02019	-5.58141	0.000165392	0.0408637	-1	19	43211791	43269530	-	57740	5041	0.420738	0.456259	0.41734	protein_coding
GH2	ENSG00000136487	4.3553	-5.54936	0.000216167	0.0439836	-1	17	63880215	63881944	-	1730	1152	0.565067	0.565104	0.564991	protein_coding
PSG8	ENSG00000124467	3.21625	-5.44979	0.000151225	0.0402374	-1	19	42752686	42855691	-	103006	4082	0.426183	0.490446	0.423531	protein_coding
CRH	ENSG00000147571	4.20427	-5.43542	0.000306852	0.046401	-1	8	66176376	66178464	-	2089	1286	0.551245	0.53577	0.57606	protein_coding
KISS1	ENSG00000170498	5.38432	-5.41148	0.000122621	0.0395263	-1	1	204190341	204196491	-	6151	711	0.516911	0.656821	0.498621	protein_coding
PSG4	ENSG00000243137	7.43985	-5.31632	0.000308535	0.046401	-1	19	43192702	43207299	-	14598	6262	0.471809	0.492494	0.456269	protein_coding
PSG6	ENSG00000170848	5.31662	-5.15606	0.000380969	0.0488064	-1	19	42902086	42919563	-	17478	5125	0.455627	0.511024	0.432642	protein_coding
CSH2	ENSG00000213218	8.05537	-5.08792	0.000191699	0.0439836	-1	17	63872012	63873766	-	1755	1754	0.567275	0.567275	0	protein_coding
MFSD2A	ENSG00000168389	4.54309	-4.9351	0.000345033	0.0467355	-1	1	39955112	39969968	+	14857	3994	0.537022	0.54031	0.535813	protein_coding
PSG3	ENSG00000221826	6.99372	-4.56255	0.000351293	0.0467355	-1	19	42721638	42740481	-	18844	3388	0.436342	0.47255	0.428405	protein_coding
SLC2A11	ENSG00000133460	5.29448	-3.18175	0.00034133	0.0467355	-1	22	23856703	23886309	+	29607	8876	0.50841	0.528729	0.499711	protein_coding
PNISR	ENSG00000132424	7.87709	-0.503507	3.29443e-05	0.0227908	-1	6	99397629	99425331	-	27703	11284	0.359396	0.345533	0.368924	protein_coding
IMPDH2	ENSG00000178035	6.60396	0.506902	0.000266613	0.046401	1	3	49024325	49029447	-	5123	5122	0.533971	0.533971	0	protein_coding
TEAD1	ENSG00000187079	6.64852	0.57308	0.000301121	0.046401	1	11	12674421	12944737	+	270317	10685	0.427588	0.428919	0.427534	protein_coding
SASH1	ENSG00000111961	6.5911	0.747561	0.000271067	0.046401	1	6	148272304	148552048	+	279745	10871	0.432921	0.468586	0.431479	protein_coding
ISM2	ENSG00000100593	9.25485	0.818096	2.51819e-07	0.000435521	1	14	77474394	77498816	-	24423	4090	0.527148	0.608802	0.510722	protein_coding
FAM53C	ENSG00000120709	6.1223	0.913345	1.84371e-11	6.37738e-08	1	5	138331935	138349729	+	17795	7037	0.484545	0.513855	0.465371	protein_coding
SLC6A8	ENSG00000130821	5.93364	1.11456	0.00021314	0.0439836	1	X	153687926	153696588	+	8663	5686	0.650081	0.63542	0.678091	protein_coding
PLK2	ENSG00000145632	6.96654	1.2229	0.000114659	0.0395263	1	5	58453982	58460139	-	6158	4637	0.417411	0.424197	0.396711	protein_coding
TSPYL2	ENSG00000184205	5.8016	1.53225	2.193e-05	0.018964	1	X	53082367	53088540	+	6174	4946	0.524704	0.532956	0.491443	protein_coding
BAG3	ENSG00000151929	6.73685	1.83415	1.38501e-05	0.0159692	1	10	119651380	119677819	+	26440	2731	0.49756	0.564628	0.489835	protein_coding
HSPH1	ENSG00000120694	6.80962	1.92102	7.17294e-05	0.031014	1	13	31134973	31162388	-	27416	8374	0.368156	0.379986	0.362954	protein_coding
HSPA1A	ENSG00000204389	7.90274	2.27762	0.000258745	0.046401	1	6	31815543	31817946	+	2404	2403	0.598002	0.598002	0	protein_coding
HSPA6	ENSG00000173110	5.41344	4.26309	0.000126605	0.0395263	1	1	161524540	161526894	+	2355	2354	0.586661	0.586661	0	protein_coding
