# Supplementary material for: Syncytiotrophoblast Markers Are Downregulated in Placentas from Idiopathic Stillbirths
Source: Int J Mol Sci. 2024 May 9;25(10):5180. doi: 10.3390/ijms25105180 (PMC11121380; doi:10.3390/ijms25105180)
Supplement: Supplementary file 1 [file ijms-25-05180-s001.zip › Supplemental Table S3.xlsx]

## Sheet: GO_SB vs LB_DOWN DEGs
query	significant	p_value	term_size	query_size	intersection_size	precision	recall	term_id	source	term_name	effective_domain_size	source_order
query_1	TRUE	2.20139e-26	803	237	57	0.240506	0.0709838	GO:0006954	GO:BP	inflammatory response	21110	2643
query_1	TRUE	3.50889e-20	2710	237	91	0.383966	0.0335793	GO:0002376	GO:BP	immune system process	21110	924
query_1	TRUE	9.70006e-19	1823	237	72	0.303797	0.0394953	GO:0006952	GO:BP	defense response	21110	2641
query_1	TRUE	9.13284e-18	1157	228	55	0.241228	0.0475367	GO:0001775	GO:BP	cell activation	21110	454
query_1	TRUE	2.67334e-17	1012	228	51	0.223684	0.0503953	GO:0045321	GO:BP	leukocyte activation	21110	12051
query_1	TRUE	3.55048e-15	2900	237	86	0.362869	0.0296552	GO:0009605	GO:BP	response to external stimulus	21110	3610
query_1	TRUE	3.78686e-14	3021	228	84	0.368421	0.0278054	GO:0051239	GO:BP	regulation of multicellular organismal process	21110	14358
query_1	TRUE	4.57212e-14	1068	237	49	0.206751	0.0458801	GO:0002684	GO:BP	positive regulation of immune system process	21110	1220
query_1	TRUE	1.0697e-13	944	212	43	0.20283	0.0455508	GO:0030097	GO:BP	hemopoiesis	21110	7038
query_1	TRUE	7.47728e-13	9081	190	137	0.721053	0.0150864	GO:0050896	GO:BP	response to stimulus	21110	14092
query_1	TRUE	9.69495e-13	847	227	41	0.180617	0.0484061	GO:0046649	GO:BP	lymphocyte activation	21110	12996
query_1	TRUE	2.64942e-12	1621	237	58	0.244726	0.0357804	GO:0009607	GO:BP	response to biotic stimulus	21110	3612
query_1	TRUE	3.00797e-12	4017	237	98	0.413502	0.0243963	GO:0006950	GO:BP	response to stress	21110	2640
query_1	TRUE	3.37626e-12	1946	237	64	0.270042	0.032888	GO:0006955	GO:BP	immune response	21110	2644
query_1	TRUE	6.03989e-12	7521	190	121	0.636842	0.0160883	GO:0051716	GO:BP	cellular response to stimulus	21110	14697
query_1	TRUE	6.97808e-12	1504	237	55	0.232068	0.0365691	GO:0002682	GO:BP	regulation of immune system process	21110	1218
query_1	TRUE	1.49076e-11	1704	228	57	0.25	0.0334507	GO:0051240	GO:BP	positive regulation of multicellular organismal process	21110	14359
query_1	TRUE	1.74313e-11	2722	190	66	0.347368	0.0242469	GO:0070887	GO:BP	cellular response to chemical stimulus	21110	17294
query_1	TRUE	2.65571e-11	610	237	34	0.14346	0.0557377	GO:0002521	GO:BP	leukocyte differentiation	21110	1061
query_1	TRUE	3.75829e-11	7716	228	140	0.614035	0.0181441	GO:0032501	GO:BP	multicellular organismal process	21110	8031
query_1	TRUE	7.04653e-11	352	237	26	0.109705	0.0738636	GO:0002237	GO:BP	response to molecule of bacterial origin	21110	788
query_1	TRUE	1.08862e-10	298	237	24	0.101266	0.0805369	GO:0002366	GO:BP	leukocyte activation involved in immune response	21110	916
query_1	TRUE	1.2673e-10	5896	190	102	0.536842	0.0172999	GO:0048856	GO:BP	anatomical structure development	21110	13840
query_1	TRUE		302	237	24	0.101266	0.0794702	GO:0002263	GO:BP	cell activation involved in immune response	21110	813
query_1	TRUE	1.80624e-10	248	237	22	0.092827	0.0887097	GO:0071216	GO:BP	cellular response to biotic stimulus	21110	17421
query_1	TRUE	2.17482e-10	1581	237	54	0.227848	0.0341556	GO:0051707	GO:BP	response to other organism	21110	14692
query_1	TRUE	2.348e-10	1584	237	54	0.227848	0.0340909	GO:0043207	GO:BP	response to external biotic stimulus	21110	11164
query_1	TRUE	3.8576e-10	2809	237	75	0.316456	0.0266999	GO:0010033	GO:BP	response to organic substance	21110	3923
query_1	TRUE	4.03708e-10	6493	237	127	0.535865	0.0195595	GO:0023052	GO:BP	signaling	21110	7002
query_1	TRUE	4.61644e-10	6034	237	121	0.510549	0.020053	GO:0007165	GO:BP	signal transduction	21110	2792
query_1	TRUE	4.97444e-10	716	237	35	0.147679	0.0488827	GO:0050865	GO:BP	regulation of cell activation	21110	14066
query_1	TRUE	5.29007e-10	6604	190	108	0.568421	0.0163537	GO:0007154	GO:BP	cell communication	21110	2781
query_1	TRUE	5.43721e-10	2890	237	76	0.320675	0.0262976	GO:0007166	GO:BP	cell surface receptor signaling pathway	21110	2793
query_1	TRUE	6.99696e-10	1530	185	45	0.243243	0.0294118	GO:0007155	GO:BP	cell adhesion	21110	2782
query_1	TRUE	8.88237e-10	240	237	21	0.0886076	0.0875	GO:0002274	GO:BP	myeloid leukocyte activation	21110	824
query_1	TRUE	9.29902e-10	462	237	28	0.118143	0.0606061	GO:0050867	GO:BP	positive regulation of cell activation	21110	14068
query_1	TRUE	1.16156e-09	547	203	28	0.137931	0.0511883	GO:0042110	GO:BP	T cell activation	21110	10539
query_1	TRUE	1.45354e-09	661	237	33	0.139241	0.0499244	GO:0002694	GO:BP	regulation of leukocyte activation	21110	1230
query_1	TRUE	1.58076e-09	919	237	39	0.164557	0.0424374	GO:0034097	GO:BP	response to cytokine	21110	8849
query_1	TRUE	1.76504e-09	4013	237	92	0.388186	0.0229255	GO:0048583	GO:BP	regulation of response to stimulus	21110	13594
query_1	TRUE	2.43264e-09	1365	237	48	0.202532	0.0351648	GO:0040011	GO:BP	locomotion	21110	10464
query_1	TRUE	2.5765e-09	446	237	27	0.113924	0.0605381	GO:0002696	GO:BP	positive regulation of leukocyte activation	21110	1232
query_1	TRUE	3.68806e-09	1752	237	55	0.232068	0.0313927	GO:0044419	GO:BP	biological process involved in interspecies interaction between organisms	21110	11653
query_1	TRUE	5.27523e-09	693	237	33	0.139241	0.047619	GO:0002252	GO:BP	immune effector process	21110	802
query_1	TRUE	5.97628e-09	333	189	21	0.111111	0.0630631	GO:0032496	GO:BP	response to lipopolysaccharide	21110	8027
query_1	TRUE	6.29912e-09	826	237	36	0.151899	0.0435835	GO:0071345	GO:BP	cellular response to cytokine stimulus	21110	17543
query_1	TRUE	7.87968e-09	6489	206	111	0.538835	0.0171059	GO:0032502	GO:BP	developmental process	21110	8032
query_1	TRUE	1.0238e-08	315	228	22	0.0964912	0.0698413	GO:0006909	GO:BP	phagocytosis	21110	2615
query_1	TRUE	1.25943e-08	4124	193	79	0.409326	0.0191562	GO:0042221	GO:BP	response to chemical	21110	10621
query_1	TRUE	2.20388e-08	1505	237	49	0.206751	0.0325581	GO:0016477	GO:BP	cell migration	21110	5356
query_1	TRUE	2.96553e-08	2019	237	58	0.244726	0.0287271	GO:0071310	GO:BP	cellular response to organic substance	21110	17511
query_1	TRUE	2.9932e-08	477	228	26	0.114035	0.0545073	GO:0045785	GO:BP	positive regulation of cell adhesion	21110	12317
query_1	TRUE	3.16766e-08	106	237	14	0.0590717	0.132075	GO:0042116	GO:BP	macrophage activation	21110	10541
query_1	TRUE	3.27132e-08	12891	228	186	0.815789	0.0144287	GO:0065007	GO:BP	biological regulation	21110	16811
query_1	TRUE	3.66571e-08	480	211	25	0.118483	0.0520833	GO:1903131	GO:BP	mononuclear cell differentiation	21110	23860
query_1	TRUE	3.88066e-08	317	174	19	0.109195	0.0599369	GO:0022409	GO:BP	positive regulation of cell-cell adhesion	21110	6962
query_1	TRUE	4.85589e-08	396	237	24	0.101266	0.0606061	GO:0050900	GO:BP	leukocyte migration	21110	14095
query_1	TRUE	5.47413e-08	12480	190	155	0.815789	0.0124199	GO:0050789	GO:BP	regulation of biological process	21110	14004
query_1	TRUE	6.25674e-08	1037	237	39	0.164557	0.0376085	GO:0032101	GO:BP	regulation of response to external stimulus	21110	7777
query_1	TRUE	6.9865e-08	2669	237	68	0.28692	0.0254777	GO:0035556	GO:BP	intracellular signal transduction	21110	9589
query_1	TRUE	8.18079e-08	778	184	29	0.157609	0.0372751	GO:0030155	GO:BP	regulation of cell adhesion	21110	7051
query_1	TRUE	9.01065e-08	402	181	21	0.116022	0.0522388	GO:0007159	GO:BP	leukocyte cell-cell adhesion	21110	2786
query_1	TRUE	9.56742e-08	254	228	19	0.0833333	0.0748031	GO:0002699	GO:BP	positive regulation of immune effector process	21110	1235
query_1	TRUE	1.10843e-07	1310	228	43	0.188596	0.0328244	GO:0051094	GO:BP	positive regulation of developmental process	21110	14249
query_1	TRUE	1.1338e-07	1522	237	48	0.202532	0.0315375	GO:0044093	GO:BP	positive regulation of molecular function	21110	11549
query_1	TRUE	1.36109e-07	6358	237	119	0.50211	0.0187166	GO:0048518	GO:BP	positive regulation of biological process	21110	13539
query_1	TRUE	1.40656e-07	969	237	37	0.156118	0.0381837	GO:0051336	GO:BP	regulation of hydrolase activity	21110	14432
query_1	TRUE	1.41184e-07	2763	228	67	0.29386	0.024249	GO:0048468	GO:BP	cell development	21110	13507
query_1	TRUE	1.47386e-07	221	237	18	0.0759494	0.081448	GO:0071219	GO:BP	cellular response to molecule of bacterial origin	21110	17424
query_1	TRUE	1.50048e-07	786	237	33	0.139241	0.0419847	GO:0009617	GO:BP	response to bacterium	21110	3620
query_1	TRUE	1.67192e-07	1705	237	51	0.21519	0.029912	GO:0048870	GO:BP	cell motility	21110	13853
query_1	TRUE	2.02867e-07	5615	237	109	0.459916	0.0194123	GO:0048522	GO:BP	positive regulation of cellular process	21110	13543
query_1	TRUE	2.07202e-07	11108	190	143	0.752632	0.0128736	GO:0050794	GO:BP	regulation of cellular process	21110	14008
query_1	TRUE	2.08316e-07	269	174	17	0.0977011	0.063197	GO:1903039	GO:BP	positive regulation of leukocyte cell-cell adhesion	21110	23786
query_1	TRUE	2.58991e-07	4658	189	81	0.428571	0.0173894	GO:0007275	GO:BP	multicellular organism development	21110	2871
query_1	TRUE	2.60328e-07	1840	237	53	0.223629	0.0288043	GO:0050790	GO:BP	regulation of catalytic activity	21110	14005
query_1	TRUE	3.59221e-07	380	227	22	0.0969163	0.0578947	GO:0002768	GO:BP	immune response-regulating cell surface receptor signaling pathway	21110	1298
query_1	TRUE	4.45102e-07	106	237	13	0.0548523	0.122642	GO:0030593	GO:BP	neutrophil chemotaxis	21110	7226
query_1	TRUE	4.79397e-07	481	237	25	0.105485	0.0519751	GO:0001819	GO:BP	positive regulation of cytokine production	21110	490
query_1	TRUE	4.98409e-07	246	174	16	0.091954	0.0650407	GO:0050870	GO:BP	positive regulation of T cell activation	21110	14071
query_1	TRUE	5.99304e-07	912	228	34	0.149123	0.0372807	GO:0050776	GO:BP	regulation of immune response	21110	13996
query_1	TRUE	8.17554e-07	364	181	19	0.104972	0.0521978	GO:1903037	GO:BP	regulation of leukocyte cell-cell adhesion	21110	23784
query_1	TRUE	8.38682e-07	160	237	15	0.0632911	0.09375	GO:0097530	GO:BP	granulocyte migration	21110	19736
query_1	TRUE	1.38062e-06	631	237	28	0.118143	0.044374	GO:0006935	GO:BP	chemotaxis	21110	2631
query_1	TRUE	1.45585e-06	2712	188	56	0.297872	0.020649	GO:0009653	GO:BP	anatomical structure morphogenesis	21110	3648
query_1	TRUE	1.48213e-06	633	237	28	0.118143	0.0442338	GO:0042330	GO:BP	taxis	21110	10669
query_1	TRUE	1.71685e-06	373	228	21	0.0921053	0.0563003	GO:0002697	GO:BP	regulation of immune effector process	21110	1233
query_1	TRUE	1.91296e-06	916	237	34	0.14346	0.0371179	GO:0033993	GO:BP	response to lipid	21110	8812
query_1	TRUE	1.97044e-06	1116	237	38	0.160338	0.0340502	GO:0043085	GO:BP	positive regulation of catalytic activity	21110	11100
query_1	TRUE	1.97622e-06	476	181	21	0.116022	0.0441176	GO:0022407	GO:BP	regulation of cell-cell adhesion	21110	6960
query_1	TRUE	2.097e-06	101	228	12	0.0526316	0.118812	GO:0050764	GO:BP	regulation of phagocytosis	21110	13984
query_1	TRUE	2.2408e-06	950	185	30	0.162162	0.0315789	GO:0098609	GO:BP	cell-cell adhesion	21110	19855
query_1	TRUE	2.40123e-06	499	228	24	0.105263	0.0480962	GO:0002764	GO:BP	immune response-regulating signaling pathway	21110	1294
query_1	TRUE	2.86518e-06	566	237	26	0.109705	0.0459364	GO:0032103	GO:BP	positive regulation of response to external stimulus	21110	7779
query_1	TRUE	2.99935e-06	2586	237	63	0.265823	0.0243619	GO:0065009	GO:BP	regulation of molecular function	21110	16813
query_1	TRUE	3.16765e-06	1994	228	52	0.22807	0.0260782	GO:0008283	GO:BP	cell population proliferation	21110	3223
query_1	TRUE	3.21164e-06	183	228	15	0.0657895	0.0819672	GO:1903708	GO:BP	positive regulation of hemopoiesis	21110	24348
query_1	TRUE	3.21164e-06	183	228	15	0.0657895	0.0819672	GO:1902107	GO:BP	positive regulation of leukocyte differentiation	21110	23041
query_1	TRUE	3.25824e-06	101	237	12	0.0506329	0.118812	GO:0002275	GO:BP	myeloid cell activation involved in immune response	21110	825
query_1	TRUE	3.42166e-06	1243	237	40	0.168776	0.0321802	GO:0098542	GO:BP	defense response to other organism	21110	19844
query_1	TRUE	3.47427e-06	1407	228	42	0.184211	0.0298507	GO:2000026	GO:BP	regulation of multicellular organismal development	21110	26633
query_1	TRUE	3.50255e-06	352	227	20	0.0881057	0.0568182	GO:0002429	GO:BP	immune response-activating cell surface receptor signaling pathway	21110	970
query_1	TRUE	3.59487e-06	4318	215	82	0.381395	0.0189903	GO:0030154	GO:BP	cell differentiation	21110	7050
query_1	TRUE	4.01323e-06	208	237	16	0.0675105	0.0769231	GO:0019722	GO:BP	calcium-mediated signaling	21110	6346
query_1	TRUE	4.36391e-06	240	237	17	0.07173	0.0708333	GO:0030595	GO:BP	leukocyte chemotaxis	21110	7227
query_1	TRUE	4.82893e-06	4344	215	82	0.381395	0.0188766	GO:0048869	GO:BP	cellular developmental process	21110	13852
query_1	TRUE	4.91043e-06	428	211	21	0.0995261	0.0490654	GO:0030098	GO:BP	lymphocyte differentiation	21110	7039
query_1	TRUE	4.95063e-06	242	237	17	0.07173	0.0702479	GO:0097529	GO:BP	myeloid leukocyte migration	21110	19735
query_1	TRUE	5.00103e-06	3848	205	73	0.356098	0.0189709	GO:0009893	GO:BP	positive regulation of metabolic process	21110	3831
query_1	TRUE	5.20929e-06	576	174	22	0.126437	0.0381944	GO:0009611	GO:BP	response to wounding	21110	3616
query_1	TRUE	5.27096e-06	3535	205	69	0.336585	0.0195191	GO:0010604	GO:BP	positive regulation of macromolecule metabolic process	21110	4347
query_1	TRUE	5.29872e-06	399	227	21	0.092511	0.0526316	GO:0051251	GO:BP	positive regulation of lymphocyte activation	21110	14367
query_1	TRUE	5.56323e-06	84	237	11	0.0464135	0.130952	GO:0043299	GO:BP	leukocyte degranulation	21110	11197
query_1	TRUE	6.26469e-06	2482	195	53	0.271795	0.0213537	GO:0050793	GO:BP	regulation of developmental process	21110	14007
query_1	TRUE	6.34249e-06	131	237	13	0.0548523	0.0992366	GO:1990266	GO:BP	neutrophil migration	21110	26365
query_1	TRUE	6.34249e-06	131	237	13	0.0548523	0.0992366	GO:0071621	GO:BP	granulocyte chemotaxis	21110	17751
query_1	TRUE	8.05324e-06	372	181	18	0.0994475	0.0483871	GO:0050863	GO:BP	regulation of T cell activation	21110	14064
query_1	TRUE	8.16418e-06	318	237	19	0.0801688	0.0597484	GO:0060326	GO:BP	cell chemotaxis	21110	15371
query_1	TRUE	9.21017e-06	1287	237	40	0.168776	0.03108	GO:1901701	GO:BP	cellular response to oxygen-containing compound	21110	22662
query_1	TRUE	9.40962e-06	23	237	7	0.0295359	0.304348	GO:0072677	GO:BP	eosinophil migration	21110	18470
query_1	TRUE	9.74374e-06	2283	237	57	0.240506	0.0249671	GO:0048584	GO:BP	positive regulation of response to stimulus	21110	13595
query_1	TRUE	1.02687e-05	251	181	15	0.0828729	0.059761	GO:0050730	GO:BP	regulation of peptidyl-tyrosine phosphorylation	21110	13973
query_1	TRUE	1.09489e-05	739	237	29	0.122363	0.0392422	GO:0001817	GO:BP	regulation of cytokine production	21110	488
query_1	TRUE	1.31108e-05	745	237	29	0.122363	0.0389262	GO:0001816	GO:BP	cytokine production	21110	487
query_1	TRUE	1.33588e-05	235	228	16	0.0701754	0.0680851	GO:0002703	GO:BP	regulation of leukocyte mediated immunity	21110	1239
query_1	TRUE	1.42425e-05	730	228	28	0.122807	0.0383562	GO:0050778	GO:BP	positive regulation of immune response	21110	13998
query_1	TRUE	1.43341e-05	568	237	25	0.105485	0.0440141	GO:0051345	GO:BP	positive regulation of hydrolase activity	21110	14441
query_1	TRUE	1.44291e-05	65	190	9	0.0473684	0.138462	GO:0031343	GO:BP	positive regulation of cell killing	21110	7529
query_1	TRUE	1.60212e-05	118	185	11	0.0594595	0.0932203	GO:0007229	GO:BP	integrin-mediated signaling pathway	21110	2848
query_1	TRUE	2.01529e-05	412	237	21	0.0886076	0.0509709	GO:1903706	GO:BP	regulation of hemopoiesis	21110	24346
query_1	TRUE	2.06337e-05	1673	228	45	0.197368	0.0268978	GO:0042592	GO:BP	homeostatic process	21110	10828
query_1	TRUE	2.06829e-05	374	237	20	0.0843882	0.0534759	GO:0050727	GO:BP	regulation of inflammatory response	21110	13970
query_1	TRUE	2.09744e-05	471	228	22	0.0964912	0.0467091	GO:0002757	GO:BP	immune response-activating signaling pathway	21110	1287
query_1	TRUE	2.12737e-05	1796	228	47	0.20614	0.0261693	GO:1901700	GO:BP	response to oxygen-containing compound	21110	22661
query_1	TRUE	2.19111e-05	1682	235	46	0.195745	0.0273484	GO:0042127	GO:BP	regulation of cell population proliferation	21110	10550
query_1	TRUE	2.44877e-05	6441	107	61	0.570093	0.00947058	GO:1901564	GO:BP	organonitrogen compound metabolic process	21110	22563
query_1	TRUE	2.47677e-05	798	228	29	0.127193	0.0363409	GO:0006897	GO:BP	endocytosis	21110	2607
query_1	TRUE	2.70211e-05	419	237	21	0.0886076	0.0501193	GO:0030099	GO:BP	myeloid cell differentiation	21110	7040
query_1	TRUE	2.94252e-05	570	227	24	0.105727	0.0421053	GO:0051249	GO:BP	regulation of lymphocyte activation	21110	14365
query_1	TRUE	3.27377e-05	3423	237	73	0.308017	0.0213263	GO:0010646	GO:BP	regulation of cell communication	21110	4388
query_1	TRUE	4.01611e-05	532	228	23	0.100877	0.0432331	GO:0060627	GO:BP	regulation of vesicle-mediated transport	21110	15648
query_1	TRUE	4.04321e-05	212	237	15	0.0632911	0.0707547	GO:0071222	GO:BP	cellular response to lipopolysaccharide	21110	17427
query_1	TRUE	4.04388e-05	314	237	18	0.0759494	0.0573248	GO:0019932	GO:BP	second-messenger-mediated signaling	21110	6416
query_1	TRUE	4.6804e-05	317	237	18	0.0759494	0.0567823	GO:1902105	GO:BP	regulation of leukocyte differentiation	21110	23039
query_1	TRUE	4.71732e-05	3987	189	68	0.359788	0.0170554	GO:0048731	GO:BP	system development	21110	13728
query_1	TRUE	5.17943e-05	372	181	17	0.0939227	0.0456989	GO:0018108	GO:BP	peptidyl-tyrosine phosphorylation	21110	5495
query_1	TRUE	5.38549e-05	2496	228	57	0.25	0.0228365	GO:0051246	GO:BP	regulation of protein metabolic process	21110	14362
query_1	TRUE	5.46302e-05	1547	228	42	0.184211	0.0271493	GO:0006468	GO:BP	protein phosphorylation	21110	2258
query_1	TRUE	5.60146e-05	374	181	17	0.0939227	0.0454545	GO:0018212	GO:BP	peptidyl-tyrosine modification	21110	5575
query_1	TRUE	6.06883e-05	105	237	11	0.0464135	0.104762	GO:1903557	GO:BP	positive regulation of tumor necrosis factor superfamily cytokine production	21110	24207
query_1	TRUE	6.25471e-05	4753	228	88	0.385965	0.0185146	GO:0048523	GO:BP	negative regulation of cellular process	21110	13544
query_1	TRUE	6.25875e-05	545	228	23	0.100877	0.0422018	GO:0002253	GO:BP	activation of immune response	21110	803
query_1	TRUE	6.80187e-05	3413	237	72	0.303797	0.0210958	GO:0023051	GO:BP	regulation of signaling	21110	7001
query_1	TRUE	8.80735e-05	46	237	8	0.0337553	0.173913	GO:0001774	GO:BP	microglial cell activation	21110	453
query_1	TRUE	9.23975e-05	1787	188	40	0.212766	0.0223839	GO:0016310	GO:BP	phosphorylation	21110	5324
query_1	TRUE	9.34912e-05	348	226	18	0.079646	0.0517241	GO:0070661	GO:BP	leukocyte proliferation	21110	17177
query_1	TRUE	0.000109556	5932	225	101	0.448889	0.0170263	GO:0048519	GO:BP	negative regulation of biological process	21110	13540
query_1	TRUE	0.000111253	455	237	21	0.0886076	0.0461538	GO:0002443	GO:BP	leukocyte mediated immunity	21110	984
query_1	TRUE	0.000112688	60	185	8	0.0432432	0.133333	GO:0002886	GO:BP	regulation of myeloid leukocyte mediated immunity	21110	1415
query_1	TRUE	0.000122339	433	228	20	0.0877193	0.0461894	GO:0010720	GO:BP	positive regulation of cell development	21110	4445
query_1	TRUE	0.00012493	48	237	8	0.0337553	0.166667	GO:0036230	GO:BP	granulocyte activation	21110	10025
query_1	TRUE	0.000125283	927	237	31	0.130802	0.0334412	GO:0030334	GO:BP	regulation of cell migration	21110	7143
query_1	TRUE	0.00012829	168	237	13	0.0548523	0.077381	GO:0071706	GO:BP	tumor necrosis factor superfamily cytokine production	21110	17824
query_1	TRUE	0.00012829	168	237	13	0.0548523	0.077381	GO:1903555	GO:BP	regulation of tumor necrosis factor superfamily cytokine production	21110	24205
query_1	TRUE	0.000129557	354	227	18	0.0792952	0.0508475	GO:0042113	GO:BP	B cell activation	21110	10540
query_1	TRUE	0.000131685	1033	237	33	0.139241	0.0319458	GO:0040012	GO:BP	regulation of locomotion	21110	10465
query_1	TRUE	0.000136212	1771	237	46	0.194093	0.025974	GO:0051049	GO:BP	regulation of transport	21110	14219
query_1	TRUE	0.000147871	49	237	8	0.0337553	0.163265	GO:0002269	GO:BP	leukocyte activation involved in inflammatory response	21110	819
query_1	TRUE	0.000156131	988	237	32	0.135021	0.0323887	GO:2000145	GO:BP	regulation of cell motility	21110	26747
query_1	TRUE	0.000162368	3003	237	65	0.274262	0.021645	GO:0009966	GO:BP	regulation of signal transduction	21110	3882
query_1	TRUE	0.000167093	712	200	24	0.12	0.0337079	GO:0001934	GO:BP	positive regulation of protein phosphorylation	21110	563
query_1	TRUE	0.000169796	2976	190	55	0.289474	0.0184812	GO:0031325	GO:BP	positive regulation of cellular metabolic process	21110	7512
query_1	TRUE	0.000175077	72	228	9	0.0394737	0.125	GO:0050766	GO:BP	positive regulation of phagocytosis	21110	13986
query_1	TRUE	0.000188879	602	237	24	0.101266	0.0398671	GO:0071396	GO:BP	cellular response to lipid	21110	17594
query_1	TRUE	0.000215232	71	237	9	0.0379747	0.126761	GO:0150076	GO:BP	neuroinflammatory response	21110	21110
query_1	TRUE	0.000224441	1165	237	35	0.147679	0.0300429	GO:0010628	GO:BP	positive regulation of gene expression	21110	4370
query_1	TRUE	0.000230817	60	203	8	0.0394089	0.133333	GO:0032613	GO:BP	interleukin-10 production	21110	8085
query_1	TRUE	0.000230817	60	203	8	0.0394089	0.133333	GO:0032653	GO:BP	regulation of interleukin-10 production	21110	8124
query_1	TRUE	0.000254002	41	203	7	0.0344828	0.170732	GO:0032733	GO:BP	positive regulation of interleukin-10 production	21110	8202
query_1	TRUE	0.000279603	53	237	8	0.0337553	0.150943	GO:0061900	GO:BP	glial cell activation	21110	16629
query_1	TRUE	0.000296601	131	174	10	0.0574713	0.0763359	GO:0045621	GO:BP	positive regulation of lymphocyte differentiation	21110	12172
query_1	TRUE	0.000304276	247	237	15	0.0632911	0.0607287	GO:0034612	GO:BP	response to tumor necrosis factor	21110	9150
query_1	TRUE	0.000317661	726	203	24	0.118227	0.0330579	GO:0031347	GO:BP	regulation of defense response	21110	7533
query_1	TRUE	0.000340027	1720	204	40	0.196078	0.0232558	GO:0009719	GO:BP	response to endogenous stimulus	21110	3694
query_1	TRUE	0.000346973	1216	181	30	0.165746	0.0246711	GO:0018193	GO:BP	peptidyl-amino acid modification	21110	5557
query_1	TRUE	0.000350918	860	186	25	0.134409	0.0290698	GO:0010562	GO:BP	positive regulation of phosphorus metabolic process	21110	4310
query_1	TRUE	0.000350918	860	186	25	0.134409	0.0290698	GO:0045937	GO:BP	positive regulation of phosphate metabolic process	21110	12433
query_1	TRUE	0.000372015	99	237	10	0.0421941	0.10101	GO:1990869	GO:BP	cellular response to chemokine	21110	26568
query_1	TRUE	0.000372015	99	237	10	0.0421941	0.10101	GO:1990868	GO:BP	response to chemokine	21110	26567
query_1	TRUE	0.000383587	1174	188	30	0.159574	0.0255537	GO:0048646	GO:BP	anatomical structure formation involved in morphogenesis	21110	13644
query_1	TRUE	0.000398713	1072	228	32	0.140351	0.0298507	GO:0001932	GO:BP	regulation of protein phosphorylation	21110	561
query_1	TRUE	0.000449879	101	237	10	0.0421941	0.0990099	GO:0032760	GO:BP	positive regulation of tumor necrosis factor production	21110	8228
query_1	TRUE	0.000486785	307	226	16	0.0707965	0.0521173	GO:0046651	GO:BP	lymphocyte proliferation	21110	12997
query_1	TRUE	0.000489123	1728	237	44	0.185654	0.025463	GO:1902531	GO:BP	regulation of intracellular signal transduction	21110	23381
query_1	TRUE	0.00055049	835	237	28	0.118143	0.0335329	GO:0060284	GO:BP	regulation of cell development	21110	15333
query_1	TRUE	0.000559706	50	185	7	0.0378378	0.14	GO:0043300	GO:BP	regulation of leukocyte degranulation	21110	11198
query_1	TRUE	0.000565499	14	228	5	0.0219298	0.357143	GO:1902563	GO:BP	regulation of neutrophil activation	21110	23399
query_1	TRUE	0.000594215	136	228	11	0.0482456	0.0808824	GO:0002705	GO:BP	positive regulation of leukocyte mediated immunity	21110	1241
query_1	TRUE	0.000596294	225	237	14	0.0590717	0.0622222	GO:0071356	GO:BP	cellular response to tumor necrosis factor	21110	17554
query_1	TRUE	0.00060727	2115	237	50	0.21097	0.0236407	GO:0032879	GO:BP	regulation of localization	21110	8303
query_1	TRUE	0.000610703	996	237	31	0.130802	0.0311245	GO:0045087	GO:BP	innate immune response	21110	11960
query_1	TRUE	0.000612285	1742	237	44	0.185654	0.0252583	GO:0023056	GO:BP	positive regulation of signaling	21110	7003
query_1	TRUE	0.000632093	1744	237	44	0.185654	0.0252294	GO:0010647	GO:BP	positive regulation of cell communication	21110	4389
query_1	TRUE	0.000655155	100	190	9	0.0473684	0.09	GO:0031341	GO:BP	regulation of cell killing	21110	7527
query_1	TRUE	0.000659543	314	226	16	0.0707965	0.0509554	GO:0032943	GO:BP	mononuclear cell proliferation	21110	8356
query_1	TRUE	0.000664903	42	228	7	0.0307018	0.166667	GO:0042119	GO:BP	neutrophil activation	21110	10544
query_1	TRUE	0.000719027	163	237	12	0.0506329	0.0736196	GO:0032640	GO:BP	tumor necrosis factor production	21110	8111
query_1	TRUE	0.000719027	163	237	12	0.0506329	0.0736196	GO:0032680	GO:BP	regulation of tumor necrosis factor production	21110	8150
query_1	TRUE	0.000734174	2008	188	41	0.218085	0.0204183	GO:0009888	GO:BP	tissue development	21110	3826
query_1	TRUE	0.000746227	17	193	5	0.0259067	0.294118	GO:0034134	GO:BP	toll-like receptor 2 signaling pathway	21110	8883
query_1	TRUE	0.000750025	85	228	9	0.0394737	0.105882	GO:0032677	GO:BP	regulation of interleukin-8 production	21110	8147
query_1	TRUE	0.000750025	85	228	9	0.0394737	0.105882	GO:0032637	GO:BP	interleukin-8 production	21110	8108
query_1	TRUE	0.000752359	2763	191	51	0.267016	0.0184582	GO:0006796	GO:BP	phosphate-containing compound metabolic process	21110	2537
query_1	TRUE	0.000801148	5662	190	83	0.436842	0.0146591	GO:0051171	GO:BP	regulation of nitrogen compound metabolic process	21110	14316
query_1	TRUE	0.000840472	207	226	13	0.0575221	0.0628019	GO:0002285	GO:BP	lymphocyte activation involved in immune response	21110	835
query_1	TRUE	0.000862962	427	237	19	0.0801688	0.0444965	GO:0031349	GO:BP	positive regulation of defense response	21110	7535
query_1	TRUE	0.000908443	969	186	26	0.139785	0.0268318	GO:0031401	GO:BP	positive regulation of protein modification process	21110	7554
query_1	TRUE	0.000923004	3131	190	55	0.289474	0.0175663	GO:0051173	GO:BP	positive regulation of nitrogen compound metabolic process	21110	14318
query_1	TRUE	0.0009248	782	200	24	0.12	0.0306905	GO:0042327	GO:BP	positive regulation of phosphorylation	21110	10668
query_1	TRUE	0.000948995	18	190	5	0.0263158	0.277778	GO:0032930	GO:BP	positive regulation of superoxide anion generation	21110	8349
query_1	TRUE	0.00099265	181	180	11	0.0611111	0.0607735	GO:0050731	GO:BP	positive regulation of peptidyl-tyrosine phosphorylation	21110	13974
query_1	TRUE	0.000994175	2788	191	51	0.267016	0.0182927	GO:0006793	GO:BP	phosphorus metabolic process	21110	2534
query_1	TRUE	0.00111097	116	174	9	0.0517241	0.0775862	GO:0045582	GO:BP	positive regulation of T cell differentiation	21110	12133
query_1	TRUE	0.00111988	1538	237	40	0.168776	0.0260078	GO:0009967	GO:BP	positive regulation of signal transduction	21110	3883
query_1	TRUE	0.00118427	849	228	27	0.118421	0.0318021	GO:0045597	GO:BP	positive regulation of cell differentiation	21110	12148
query_1	TRUE	0.00121193	921	237	29	0.122363	0.0314875	GO:0051050	GO:BP	positive regulation of transport	21110	14220
query_1	TRUE	0.00129279	113	237	10	0.0421941	0.0884956	GO:0002444	GO:BP	myeloid leukocyte mediated immunity	21110	985
query_1	TRUE	0.00133801	821	237	27	0.113924	0.0328867	GO:0032940	GO:BP	secretion by cell	21110	8354
query_1	TRUE	0.00135779	118	228	10	0.0438596	0.0847458	GO:0002526	GO:BP	acute inflammatory response	21110	1066
query_1	TRUE	0.00141575	1333	186	31	0.166667	0.0232558	GO:0019220	GO:BP	regulation of phosphate metabolic process	21110	5898
query_1	TRUE	0.00143861	1334	186	31	0.166667	0.0232384	GO:0051174	GO:BP	regulation of phosphorus metabolic process	21110	14319
query_1	TRUE	0.00144508	290	228	15	0.0657895	0.0517241	GO:0030100	GO:BP	regulation of endocytosis	21110	7041
query_1	TRUE	0.00150361	1110	189	28	0.148148	0.0252252	GO:0051241	GO:BP	negative regulation of multicellular organismal process	21110	14360
query_1	TRUE	0.00160128	157	174	10	0.0574713	0.0636943	GO:0030183	GO:BP	B cell differentiation	21110	7063
query_1	TRUE	0.00160173	737	188	22	0.117021	0.0298507	GO:0001944	GO:BP	vasculature development	21110	570
query_1	TRUE	0.00169661	90	237	9	0.0379747	0.1	GO:0070098	GO:BP	chemokine-mediated signaling pathway	21110	16835
query_1	TRUE	0.00170224	17	228	5	0.0219298	0.294118	GO:0036005	GO:BP	response to macrophage colony-stimulating factor	21110	9899
query_1	TRUE	0.00171969	884	237	28	0.118143	0.0316742	GO:0140352	GO:BP	export from cell	21110	20837
query_1	TRUE	0.0017814	94	228	9	0.0394737	0.0957447	GO:0032602	GO:BP	chemokine production	21110	8074
query_1	TRUE	0.0017814	94	228	9	0.0394737	0.0957447	GO:0032642	GO:BP	regulation of chemokine production	21110	8113
query_1	TRUE	0.00178422	3128	189	54	0.285714	0.0172634	GO:0048513	GO:BP	animal organ development	21110	13536
query_1	TRUE	0.00189432	1616	189	35	0.185185	0.0216584	GO:0048585	GO:BP	negative regulation of response to stimulus	21110	13596
query_1	TRUE	0.00190616	147	237	11	0.0464135	0.0748299	GO:0050729	GO:BP	positive regulation of inflammatory response	21110	13972
query_1	TRUE	0.00197047	325	237	16	0.0675105	0.0492308	GO:0070371	GO:BP	ERK1 and ERK2 cascade	21110	17010
query_1	TRUE	0.00198634	7345	205	105	0.512195	0.0142954	GO:0019222	GO:BP	regulation of metabolic process	21110	5900
query_1	TRUE	0.00211518	189	226	12	0.0530973	0.0634921	GO:0001906	GO:BP	cell killing	21110	539
query_1	TRUE	0.00220495	21	190	5	0.0263158	0.238095	GO:0032928	GO:BP	regulation of superoxide anion generation	21110	8347
query_1	TRUE	0.00220517	155	228	11	0.0482456	0.0709677	GO:0045807	GO:BP	positive regulation of endocytosis	21110	12331
query_1	TRUE	0.00250567	89	185	8	0.0432432	0.0898876	GO:0033627	GO:BP	cell adhesion mediated by integrin	21110	8766
query_1	TRUE	0.00253161	1654	228	40	0.175439	0.0241838	GO:0016192	GO:BP	vesicle-mediated transport	21110	5292
query_1	TRUE	0.00257241	1451	203	34	0.167488	0.0234321	GO:0051247	GO:BP	positive regulation of protein metabolic process	21110	14363
query_1	TRUE	0.00263953	227	228	13	0.0570175	0.0572687	GO:0072593	GO:BP	reactive oxygen species metabolic process	21110	18432
query_1	TRUE	0.00264495	644	47	10	0.212766	0.015528	GO:0043086	GO:BP	negative regulation of catalytic activity	21110	11101
query_1	TRUE	0.00306605	709	235	24	0.102128	0.0338505	GO:0008285	GO:BP	negative regulation of cell population proliferation	21110	3225
query_1	TRUE	0.00308913	5836	190	83	0.436842	0.0142221	GO:0080090	GO:BP	regulation of primary metabolic process	21110	18790
query_1	TRUE	0.00314968	302	203	14	0.0689655	0.0463576	GO:0030217	GO:BP	T cell differentiation	21110	7088
query_1	TRUE	0.00331183	1181	228	32	0.140351	0.0270957	GO:0042325	GO:BP	regulation of phosphorylation	21110	10666
query_1	TRUE	0.00357552	1961	218	43	0.197248	0.0219276	GO:0012501	GO:BP	programmed cell death	21110	4688
query_1	TRUE	0.00368384	225	237	13	0.0548523	0.0577778	GO:0002573	GO:BP	myeloid leukocyte differentiation	21110	1112
query_1	TRUE	0.00369482	41	190	6	0.0315789	0.146341	GO:0042554	GO:BP	superoxide anion generation	21110	10820
query_1	TRUE	0.003743	301	237	15	0.0632911	0.0498339	GO:0070372	GO:BP	regulation of ERK1 and ERK2 cascade	21110	17011
query_1	TRUE	0.00374721	165	226	11	0.0486726	0.0666667	GO:0070665	GO:BP	positive regulation of leukocyte proliferation	21110	17181
query_1	TRUE	0.00374991	313	228	15	0.0657895	0.0479233	GO:0051222	GO:BP	positive regulation of protein transport	21110	14344
query_1	TRUE	0.00380137	19	237	5	0.021097	0.263158	GO:0048245	GO:BP	eosinophil chemotaxis	21110	13340
query_1	TRUE	0.00424879	239	226	13	0.0575221	0.0543933	GO:0050670	GO:BP	regulation of lymphocyte proliferation	21110	13948
query_1	TRUE	0.00426845	228	237	13	0.0548523	0.0570175	GO:0002685	GO:BP	regulation of leukocyte migration	21110	1221
query_1	TRUE	0.00490513	2129	204	43	0.210784	0.0201973	GO:0008219	GO:BP	cell death	21110	3218
query_1	TRUE	0.00510592	243	226	13	0.0575221	0.0534979	GO:0032944	GO:BP	regulation of mononuclear cell proliferation	21110	8357
query_1	TRUE	0.00513252	67	190	7	0.0368421	0.104478	GO:0006801	GO:BP	superoxide metabolic process	21110	2541
query_1	TRUE	0.00515915	5449	165	70	0.424242	0.0128464	GO:0019538	GO:BP	protein metabolic process	21110	6189
query_1	TRUE	0.00517229	204	228	12	0.0526316	0.0588235	GO:0002758	GO:BP	innate immune response-activating signaling pathway	21110	1288
query_1	TRUE	0.00523639	482	237	19	0.0801688	0.0394191	GO:0019221	GO:BP	cytokine-mediated signaling pathway	21110	5899
query_1	TRUE	0.00542545	1438	193	32	0.165803	0.0222531	GO:0080134	GO:BP	regulation of response to stress	21110	18808
query_1	TRUE	0.00542761	233	237	13	0.0548523	0.055794	GO:0045055	GO:BP	regulated exocytosis	21110	11943
query_1	TRUE	0.00567735	37	228	6	0.0263158	0.162162	GO:0097242	GO:BP	amyloid-beta clearance	21110	19594
query_1	TRUE	0.00579655	532	237	20	0.0843882	0.037594	GO:0030335	GO:BP	positive regulation of cell migration	21110	7144
query_1	TRUE	0.00619979	4	190	3	0.0157895	0.75	GO:0071226	GO:BP	cellular response to molecule of fungal origin	21110	17431
query_1	TRUE	0.00639684	1705	150	30	0.2	0.0175953	GO:0022008	GO:BP	neurogenesis	21110	6923
query_1	TRUE	0.00652617	764	228	24	0.105263	0.0314136	GO:0048871	GO:BP	multicellular organismal-level homeostasis	21110	13854
query_1	TRUE	0.00654018	286	228	14	0.0614035	0.048951	GO:0001666	GO:BP	response to hypoxia	21110	391
query_1	TRUE	0.00691865	329	228	15	0.0657895	0.0455927	GO:1904951	GO:BP	positive regulation of establishment of protein localization	21110	25409
query_1	TRUE	0.00700985	1469	228	36	0.157895	0.0245065	GO:0071495	GO:BP	cellular response to endogenous stimulus	21110	17675
query_1	TRUE	0.00766369	955	237	28	0.118143	0.0293194	GO:0046903	GO:BP	secretion	21110	13155
query_1	TRUE	0.00804028	224	61	7	0.114754	0.03125	GO:0010466	GO:BP	negative regulation of peptidase activity	21110	4249
query_1	TRUE	0.00807137	60	228	7	0.0307018	0.116667	GO:0034113	GO:BP	heterotypic cell-cell adhesion	21110	8862
query_1	TRUE	0.00824247	145	226	10	0.0442478	0.0689655	GO:0050671	GO:BP	positive regulation of lymphocyte proliferation	21110	13949
query_1	TRUE	0.00860309	1082	188	26	0.138298	0.0240296	GO:0035295	GO:BP	tube development	21110	9435
query_1	TRUE	0.00900729	114	228	9	0.0394737	0.0789474	GO:0002821	GO:BP	positive regulation of adaptive immune response	21110	1350
query_1	TRUE	0.0094658	58	40	4	0.1	0.0689655	GO:0043030	GO:BP	regulation of macrophage activation	21110	11066
query_1	TRUE	0.00955644	16	152	4	0.0263158	0.25	GO:0090594	GO:BP	inflammatory response to wounding	21110	19389
query_1	TRUE	0.00990241	148	226	10	0.0442478	0.0675676	GO:0032946	GO:BP	positive regulation of mononuclear cell proliferation	21110	8359
query_1	TRUE	0.0102031	330	61	8	0.131148	0.0242424	GO:0051346	GO:BP	negative regulation of hydrolase activity	21110	14442
query_1	TRUE	0.0104228	1905	218	41	0.188073	0.0215223	GO:0006915	GO:BP	apoptotic process	21110	2620
query_1	TRUE	0.0109258	299	228	14	0.0614035	0.0468227	GO:0036293	GO:BP	response to decreased oxygen levels	21110	10067
query_1	TRUE	0.0113956	40	237	6	0.0253165	0.15	GO:0050850	GO:BP	positive regulation of calcium-mediated signaling	21110	14051
query_1	TRUE	0.0115149	235	114	9	0.0789474	0.0382979	GO:0010001	GO:BP	glial cell differentiation	21110	3901
query_1	TRUE	0.0115777	706	188	20	0.106383	0.0283286	GO:0001568	GO:BP	blood vessel development	21110	367
query_1	TRUE	0.0118279	558	237	20	0.0843882	0.0358423	GO:2000147	GO:BP	positive regulation of cell motility	21110	26749
query_1	TRUE	0.0120278	213	237	12	0.0506329	0.056338	GO:0070374	GO:BP	positive regulation of ERK1 and ERK2 cascade	21110	17013
query_1	TRUE	0.0121373	29	190	5	0.0263158	0.172414	GO:0090322	GO:BP	regulation of superoxide metabolic process	21110	19226
query_1	TRUE	0.0125163	64	228	7	0.0307018	0.109375	GO:0032757	GO:BP	positive regulation of interleukin-8 production	21110	8225
query_1	TRUE	0.0133576	76	193	7	0.0362694	0.0921053	GO:0002220	GO:BP	innate immune response activating cell surface receptor signaling pathway	21110	772
query_1	TRUE	0.0142864	267	226	13	0.0575221	0.0486891	GO:0070663	GO:BP	regulation of leukocyte proliferation	21110	17179
query_1	TRUE	0.0142957	212	98	8	0.0816327	0.0377358	GO:0045619	GO:BP	regulation of lymphocyte differentiation	21110	12170
query_1	TRUE	0.01439	153	228	10	0.0438596	0.0653595	GO:0032635	GO:BP	interleukin-6 production	21110	8106
query_1	TRUE	0.01439	153	228	10	0.0438596	0.0653595	GO:0032675	GO:BP	regulation of interleukin-6 production	21110	8145
query_1	TRUE	0.0150242	304	170	12	0.0705882	0.0394737	GO:0048872	GO:BP	homeostasis of number of cells	21110	13855
query_1	TRUE	0.0150337	1494	186	31	0.166667	0.0207497	GO:0031399	GO:BP	regulation of protein modification process	21110	7552
query_1	TRUE	0.0152158	772	237	24	0.101266	0.0310881	GO:0000165	GO:BP	MAPK cascade	21110	59
query_1	TRUE	0.0152992	935	237	27	0.113924	0.028877	GO:0014070	GO:BP	response to organic cyclic compound	21110	4755
query_1	TRUE	0.0153965	5	190	3	0.0157895	0.6	GO:0002238	GO:BP	response to molecule of fungal origin	21110	789
query_1	TRUE	0.0156806	213	203	11	0.0541872	0.0516432	GO:0042098	GO:BP	T cell proliferation	21110	10534
query_1	TRUE	0.0161933	104	203	8	0.0394089	0.0769231	GO:0042102	GO:BP	positive regulation of T cell proliferation	21110	10536
query_1	TRUE	0.0166981	1123	188	26	0.138298	0.0231523	GO:0072359	GO:BP	circulatory system development	21110	18343
query_1	TRUE	0.0169595	229	228	12	0.0526316	0.0524017	GO:0002218	GO:BP	activation of innate immune response	21110	771
query_1	TRUE	0.0169634	150	237	10	0.0421941	0.0666667	GO:0002687	GO:BP	positive regulation of leukocyte migration	21110	1223
query_1	TRUE	0.0171718	997	237	28	0.118143	0.0280843	GO:1902533	GO:BP	positive regulation of intracellular signal transduction	21110	23383
query_1	TRUE	0.017233	453	225	17	0.0755556	0.0375276	GO:0007015	GO:BP	actin filament organization	21110	2683
query_1	TRUE	0.0176051	192	228	11	0.0482456	0.0572917	GO:0002819	GO:BP	regulation of adaptive immune response	21110	1348
query_1	TRUE	0.0179339	574	237	20	0.0843882	0.0348432	GO:0040017	GO:BP	positive regulation of locomotion	21110	10470
query_1	TRUE	0.0181338	320	193	13	0.0673575	0.040625	GO:0002833	GO:BP	positive regulation of response to biotic stimulus	21110	1362
query_1	TRUE	0.0182363	5493	190	77	0.405263	0.0140178	GO:0031323	GO:BP	regulation of cellular metabolic process	21110	7510
query_1	TRUE	0.0198639	875	199	23	0.115578	0.0262857	GO:0009725	GO:BP	response to hormone	21110	3700
query_1	TRUE	0.0204697	320	114	10	0.0877193	0.03125	GO:0042063	GO:BP	gliogenesis	21110	10516
query_1	TRUE	0.0206533	406	228	16	0.0701754	0.0394089	GO:0052547	GO:BP	regulation of peptidase activity	21110	14960
query_1	TRUE	0.0213244	165	221	10	0.0452489	0.0606061	GO:1904018	GO:BP	positive regulation of vasculature development	21110	24598
query_1	TRUE	0.0213244	165	221	10	0.0452489	0.0606061	GO:0045766	GO:BP	positive regulation of angiogenesis	21110	12302
query_1	TRUE	0.0217796	180	203	10	0.0492611	0.0555556	GO:0045580	GO:BP	regulation of T cell differentiation	21110	12131
query_1	TRUE	0.0226548	319	70	8	0.114286	0.0250784	GO:0045861	GO:BP	negative regulation of proteolysis	21110	12375
query_1	TRUE	0.0228636	70	228	7	0.0307018	0.1	GO:0032722	GO:BP	positive regulation of chemokine production	21110	8191
query_1	TRUE	0.0239061	129	227	9	0.0396476	0.0697674	GO:0006911	GO:BP	phagocytosis, engulfment	21110	2617
query_1	TRUE	0.023992	182	203	10	0.0492611	0.0549451	GO:0042129	GO:BP	regulation of T cell proliferation	21110	10552
query_1	TRUE	0.0243093	98	228	8	0.0350877	0.0816327	GO:0032755	GO:BP	positive regulation of interleukin-6 production	21110	8223
query_1	TRUE	0.0244976	293	185	12	0.0648649	0.0409556	GO:1903532	GO:BP	positive regulation of secretion by cell	21110	24183
query_1	TRUE	0.0247018	619	188	18	0.0957447	0.0290792	GO:0048514	GO:BP	blood vessel morphogenesis	21110	13537
query_1	TRUE	0.0254775	1060	228	28	0.122807	0.0264151	GO:0010243	GO:BP	response to organonitrogen compound	21110	4100
query_1	TRUE	0.0280921	564	228	19	0.0833333	0.0336879	GO:1903530	GO:BP	regulation of secretion by cell	21110	24181
query_1	TRUE	0.0301089	6	189	3	0.015873	0.5	GO:2000416	GO:BP	regulation of eosinophil migration	21110	27005
query_1	TRUE	0.0301267	327	228	14	0.0614035	0.0428135	GO:0070482	GO:BP	response to oxygen levels	21110	17073
query_1	TRUE	0.0319197	955	228	26	0.114035	0.0272251	GO:0008284	GO:BP	positive regulation of cell population proliferation	21110	3224
query_1	TRUE	0.0326035	2964	228	56	0.245614	0.0188934	GO:0065008	GO:BP	regulation of biological quality	21110	16812
query_1	TRUE	0.0327635	75	149	6	0.0402685	0.08	GO:0010822	GO:BP	positive regulation of mitochondrion organization	21110	4538
query_1	TRUE	0.0333127	1136	228	29	0.127193	0.0255282	GO:1901698	GO:BP	response to nitrogen compound	21110	22659
query_1	TRUE	0.0335297	731	228	22	0.0964912	0.0300958	GO:0030036	GO:BP	actin cytoskeleton organization	21110	7022
query_1	TRUE	0.0353941	401	189	14	0.0740741	0.0349127	GO:0032102	GO:BP	negative regulation of response to external stimulus	21110	7778
query_1	TRUE	0.0359117	1004	121	18	0.14876	0.0179283	GO:0051248	GO:BP	negative regulation of protein metabolic process	21110	14364
query_1	TRUE	0.0378101	475	228	17	0.0745614	0.0357895	GO:1903829	GO:BP	positive regulation of protein localization	21110	24440
query_1	TRUE	0.0389295	201	237	11	0.0464135	0.0547264	GO:0071674	GO:BP	mononuclear cell migration	21110	17797
query_1	TRUE	0.039485	18	61	3	0.0491803	0.166667	GO:0051917	GO:BP	regulation of fibrinolysis	21110	14782
query_1	TRUE	0.0408742	7	174	3	0.0172414	0.428571	GO:0045588	GO:BP	positive regulation of gamma-delta T cell differentiation	21110	12139
query_1	TRUE	0.0411281	138	227	9	0.0396476	0.0652174	GO:0099024	GO:BP	plasma membrane invagination	21110	20074
query_1	TRUE	0.0414551	296	193	12	0.0621762	0.0405405	GO:0045089	GO:BP	positive regulation of innate immune response	21110	11962
query_1	TRUE	0.0430635	133	237	9	0.0379747	0.0676692	GO:0070555	GO:BP	response to interleukin-1	21110	17109
query_1	TRUE	0.0436862	35	203	5	0.0246305	0.142857	GO:0032743	GO:BP	positive regulation of interleukin-2 production	21110	8211
query_1	TRUE	0.0441037	283	237	13	0.0548523	0.0459364	GO:0043547	GO:BP	positive regulation of GTPase activity	21110	11354
query_1	TRUE	0.0453142	37	193	5	0.0259067	0.135135	GO:0009595	GO:BP	detection of biotic stimulus	21110	3603
query_1	TRUE	0.0471698	176	227	10	0.0440529	0.0568182	GO:0046631	GO:BP	alpha-beta T cell activation	21110	12978
query_1	TRUE	0.0473386	283	113	9	0.079646	0.0318021	GO:0001818	GO:BP	negative regulation of cytokine production	21110	489
query_1	TRUE	0.0480404	38	190	5	0.0263158	0.131579	GO:0045730	GO:BP	respiratory burst	21110	12272
query_1	TRUE	0.049103	367	185	13	0.0702703	0.0354223	GO:0031589	GO:BP	cell-substrate adhesion	21110	7637
query_1	TRUE	0.0495818	108	228	8	0.0350877	0.0740741	GO:0002824	GO:BP	positive regulation of adaptive immune response based on somatic recombination of immune receptors built from immunoglobulin superfamily domains	21110	1353
query_1	TRUE	1.82503e-10	4236	185	78	0.421622	0.0184136	GO:0005576	GO:CC	extracellular region	22122	198
query_1	TRUE	2.36224e-10	6303	230	117	0.508696	0.0185626	GO:0071944	GO:CC	cell periphery	22122	2801
query_1	TRUE	4.89953e-09	12365	182	145	0.796703	0.0117266	GO:0005737	GO:CC	cytoplasm	22122	309
query_1	TRUE	7.17119e-08	3384	185	63	0.340541	0.018617	GO:0005615	GO:CC	extracellular space	22122	232
query_1	TRUE	4.01553e-07	5819	230	103	0.447826	0.0177006	GO:0005886	GO:CC	plasma membrane	22122	424
query_1	TRUE	4.04019e-07	2510	185	51	0.275676	0.0203187	GO:0031410	GO:CC	cytoplasmic vesicle	22122	1109
query_1	TRUE	4.21182e-07	2513	185	51	0.275676	0.0202945	GO:0097708	GO:CC	intracellular vesicle	22122	3146
query_1	TRUE	5.01417e-07	3998	185	68	0.367568	0.0170085	GO:0031982	GO:CC	vesicle	22122	1231
query_1	TRUE	6.28856e-07	317	185	17	0.0918919	0.0536278	GO:0030667	GO:CC	secretory granule membrane	22122	958
query_1	TRUE	6.85511e-07	893	185	28	0.151351	0.031355	GO:0030141	GO:CC	secretory granule	22122	919
query_1	TRUE	6.95696e-07	972	228	33	0.144737	0.0339506	GO:0009986	GO:CC	cell surface	22122	663
query_1	TRUE	1.97913e-06	1064	185	30	0.162162	0.0281955	GO:0099503	GO:CC	secretory vesicle	22122	3373
query_1	TRUE	2.30298e-05	58	203	8	0.0394089	0.137931	GO:0098636	GO:CC	protein complex involved in cell adhesion	22122	3233
query_1	TRUE	3.90819e-05	158	185	11	0.0594595	0.0696203	GO:0042581	GO:CC	specific granule	22122	1800
query_1	TRUE	4.0839e-05	2133	191	43	0.225131	0.0201594	GO:1903561	GO:CC	extracellular vesicle	22122	3675
query_1	TRUE	4.13817e-05	2134	191	43	0.225131	0.02015	GO:0043230	GO:CC	extracellular organelle	22122	1887
query_1	TRUE	4.13817e-05	2134	191	43	0.225131	0.02015	GO:0065010	GO:CC	extracellular membrane-bounded organelle	22122	2405
query_1	TRUE	5.36998e-05	163	185	11	0.0594595	0.0674847	GO:0070820	GO:CC	tertiary granule	22122	2574
query_1	TRUE	6.33402e-05	72	185	8	0.0432432	0.111111	GO:0070821	GO:CC	tertiary granule membrane	22122	2575
query_1	TRUE	8.34698e-05	1204	225	33	0.146667	0.0274086	GO:0030659	GO:CC	cytoplasmic vesicle membrane	22122	951
query_1	TRUE	8.35725e-05	2109	191	42	0.219895	0.0199147	GO:0070062	GO:CC	extracellular exosome	22122	2425
query_1	TRUE	0.000119172	1223	225	33	0.146667	0.0269828	GO:0012506	GO:CC	vesicle membrane	22122	690
query_1	TRUE	0.00015732	2156	225	47	0.208889	0.0217996	GO:0098588	GO:CC	bounding membrane of organelle	22122	3225
query_1	TRUE	0.000195585	4776	197	73	0.370558	0.0152848	GO:0012505	GO:CC	endomembrane system	22122	689
query_1	TRUE	0.000298306	685	228	23	0.100877	0.0335766	GO:0098552	GO:CC	side of membrane	22122	3197
query_1	TRUE	0.000360919	90	185	8	0.0432432	0.0888889	GO:0035579	GO:CC	specific granule membrane	22122	1629
query_1	TRUE	0.000609578	460	228	18	0.0789474	0.0391304	GO:0009897	GO:CC	external side of plasma membrane	22122	656
query_1	TRUE	0.000853819	855	80	14	0.175	0.0163743	GO:0005773	GO:CC	vacuole	22122	340
query_1	TRUE	0.000983198	567	173	17	0.0982659	0.0299824	GO:0031012	GO:CC	extracellular matrix	22122	1031
query_1	TRUE	0.00100671	568	173	17	0.0982659	0.0299296	GO:0030312	GO:CC	external encapsulating structure	22122	930
query_1	TRUE	0.00139497	9878	228	136	0.596491	0.013768	GO:0016020	GO:CC	membrane	22122	722
query_1	TRUE	0.00261794	178	57	6	0.105263	0.0337079	GO:0005775	GO:CC	vacuolar lumen	22122	342
query_1	TRUE	0.00320654	142	207	9	0.0434783	0.0633803	GO:0045335	GO:CC	phagocytic vesicle	22122	2195
query_1	TRUE	0.00400128	313	74	8	0.108108	0.0255591	GO:0005788	GO:CC	endoplasmic reticulum lumen	22122	353
query_1	TRUE	0.00536452	17	61	3	0.0491803	0.176471	GO:0098637	GO:CC	protein complex involved in cell-matrix adhesion	22122	3234
query_1	TRUE	0.00570397	760	66	11	0.166667	0.0144737	GO:0005764	GO:CC	lysosome	22122	332
query_1	TRUE	0.00570397	760	66	11	0.166667	0.0144737	GO:0000323	GO:CC	lytic vacuole	22122	53
query_1	TRUE	0.00915349	343	207	13	0.0628019	0.0379009	GO:0030139	GO:CC	endocytic vesicle	22122	917
query_1	TRUE	0.018568	430	67	8	0.119403	0.0186047	GO:0062023	GO:CC	collagen-containing extracellular matrix	22122	2367
query_1	TRUE	0.0202833	154	137	7	0.0510949	0.0454545	GO:0005766	GO:CC	primary lysosome	22122	334
query_1	TRUE	0.0202833	154	137	7	0.0510949	0.0454545	GO:0042582	GO:CC	azurophil granule	22122	1801
query_1	TRUE	0.0211326	2	160	2	0.0125	1	GO:0034687	GO:CC	integrin alphaL-beta2 complex	22122	1533
query_1	TRUE	0.0211326	2	160	2	0.0125	1	GO:0034689	GO:CC	integrin alphaX-beta2 complex	22122	1535
query_1	TRUE	0.022086	119	123	6	0.0487805	0.0504202	GO:0005884	GO:CC	actin filament	22122	422
query_1	TRUE	0.0282765	2	185	2	0.0108108	1	GO:0034688	GO:CC	integrin alphaM-beta2 complex	22122	1534
query_1	TRUE	0.0307818	2	193	2	0.0103627	1	GO:0035354	GO:CC	Toll-like receptor 1-Toll-like receptor 2 protein complex	22122	1610
query_1	TRUE	0.0372184	78	207	6	0.0289855	0.0769231	GO:0030670	GO:CC	phagocytic vesicle membrane	22122	961
query_1	TRUE	0.0416038	6635	17	13	0.764706	0.00195931	GO:0031974	GO:CC	membrane-enclosed lumen	22122	1224
query_1	TRUE	0.0416038	6635	17	13	0.764706	0.00195931	GO:0070013	GO:CC	intracellular organelle lumen	22122	2406
query_1	TRUE	0.0416038	6635	17	13	0.764706	0.00195931	GO:0043233	GO:CC	organelle lumen	22122	1890
query_1	TRUE	7.62497e-07	1311	226	41	0.181416	0.0312738	GO:0044877	GO:MF	protein-containing complex binding	20195	6099
query_1	TRUE	3.01714e-06	244	184	15	0.0815217	0.0614754	GO:0005539	GO:MF	glycosaminoglycan binding	20195	1511
query_1	TRUE	1.92373e-05	1564	237	44	0.185654	0.028133	GO:0005102	GO:MF	signaling receptor binding	20195	1281
query_1	TRUE	8.9631e-05	158	225	12	0.0533333	0.0759494	GO:0005178	GO:MF	integrin binding	20195	1345
query_1	TRUE	9.50001e-05	70	183	8	0.0437158	0.114286	GO:0005518	GO:MF	collagen binding	20195	1498
query_1	TRUE	0.00075999	50	237	7	0.0295359	0.14	GO:0008009	GO:MF	chemokine activity	20195	1522
query_1	TRUE	0.00181225	173	184	10	0.0543478	0.0578035	GO:0008201	GO:MF	heparin binding	20195	1614
query_1	TRUE	0.00214919	1321	237	35	0.147679	0.0264951	GO:0140677	GO:MF	molecular function activator activity	20195	10737
query_1	TRUE	0.00719352	562	185	17	0.0918919	0.0302491	GO:0050839	GO:MF	cell adhesion molecule binding	20195	7987
query_1	TRUE	0.0104212	237	237	12	0.0506329	0.0506329	GO:0005125	GO:MF	cytokine activity	20195	1297
query_1	TRUE	0.0107837	74	237	7	0.0295359	0.0945946	GO:0042379	GO:MF	chemokine receptor binding	20195	5645
query_1	TRUE	0.0219331	14881	208	177	0.850962	0.0118944	GO:0005515	GO:MF	protein binding	20195	1496
query_1	TRUE	0.0399363	8	38	2	0.0526316	0.25	GO:0016615	GO:MF	malate dehydrogenase activity	20195	2862
query_1	TRUE	0.0427623	2301	61	18	0.295082	0.00782269	GO:0097367	GO:MF	carbohydrate derivative binding	20195	9193
query_1	TRUE	0.000624193	102	237	13	0.0548523	0.127451	KEGG:04620	KEGG	Toll-like receptor signaling pathway	8161	319
query_1	TRUE	0.000697445	88	237	12	0.0506329	0.136364	KEGG:05323	KEGG	Rheumatoid arthritis	8161	478
query_1	TRUE	0.00795762	81	187	9	0.0481283	0.111111	KEGG:04662	KEGG	B cell receptor signaling pathway	8161	333
query_1	TRUE	0.0104405	98	237	11	0.0464135	0.112245	KEGG:04061	KEGG	Viral protein interaction with cytokine and cytokine receptor	8161	249
query_1	TRUE	0.0134	102	234	11	0.0470085	0.107843	KEGG:04064	KEGG	NF-kappa B signaling pathway	8161	251
query_1	TRUE	0.0143405	72	228	9	0.0394737	0.125	KEGG:05140	KEGG	Leishmaniasis	8161	426
query_1	TRUE	0.0337012	49	228	7	0.0307018	0.142857	KEGG:05144	KEGG	Malaria	8161	429
query_1	TRUE	1.04995e-06	45	237	11	0.0464135	0.244444	REAC:R-HSA-6783783	REAC	Interleukin-10 signaling	10790	1174
query_1	TRUE	0.00288807	476	185	23	0.124324	0.0483193	REAC:R-HSA-6798695	REAC	Neutrophil degranulation	10790	1511
query_1	TRUE	0.00602721	471	237	26	0.109705	0.0552017	REAC:R-HSA-449147	REAC	Signaling by Interleukins	10790	2138
query_1	TRUE	0.00877328	110	228	11	0.0482456	0.1	REAC:R-HSA-6785807	REAC	Interleukin-4 and Interleukin-13 signaling	10790	1192
query_1	TRUE	0.00938983	1100	193	39	0.202073	0.0354545	REAC:R-HSA-168249	REAC	Innate Immune System	10790	1144
query_1	TRUE	0.0222129	297	185	16	0.0864865	0.0538721	REAC:R-HSA-1474244	REAC	Extracellular matrix organization	10790	844
query_1	TRUE	0.0286599	2049	193	59	0.305699	0.0287945	REAC:R-HSA-168256	REAC	Immune System	10790	1110
query_1	TRUE	0.0403755	84	185	8	0.0432432	0.0952381	REAC:R-HSA-216083	REAC	Integrin cell surface interactions	10790	1156
query_1	TRUE	0.0026927	2917	131	41	0.312977	0.0140555	TF:M00655_1	TF	Factor: PEA3; motif: ACWTCCK; match class: 1	20011	6521
query_1	TRUE	0.00363215	2476	181	46	0.254144	0.0185784	TF:M00054	TF	Factor: NF-kappaB; motif: GGGAMTTYCC	20011	5702
query_1	TRUE	0.00714872	3227	145	46	0.317241	0.0142547	TF:M09624	TF	Factor: GATA-6; motif: NNNAGATAAGAWAN	20011	2998
query_1	TRUE	0.00958156	3621	192	61	0.317708	0.0168462	TF:M09668	TF	Factor: RelA-p65; motif: GGGRNTTTCCM	20011	7140
query_1	TRUE	0.0132483	2879	145	42	0.289655	0.0145884	TF:M09940	TF	Factor: GATA-6; motif: NNAGATAAGANAA	20011	3002
query_1	TRUE	0.0159814	1113	187	27	0.144385	0.0242588	TF:M12135_1	TF	Factor: mbnl2; motif: NYGCYTYGCTTN; match class: 1	20011	5007
query_1	TRUE	0.0208156	1668	190	35	0.184211	0.0209832	TF:M01324_1	TF	Factor: BRN1; motif: NANNTATGCATAATNNA; match class: 1	20011	6147
query_1	TRUE	0.0211848	9609	124	84	0.677419	0.0087418	TF:M00655	TF	Factor: PEA3; motif: ACWTCCK	20011	6520
query_1	TRUE	0.0309689	3536	112	39	0.348214	0.0110294	TF:M02078	TF	Factor: SPI1; motif: NGRGGAAGTN	20011	7940
query_1	TRUE	0.0422447	14426	115	102	0.886957	0.00707057	TF:M03819	TF	Factor: Elk-1; motif: GGAAGN	20011	1858

## Sheet: GO_SB vs LB_UP DEGs
query	significant	p_value	term_size	query_size	intersection_size	precision	recall	term_id	source	term_name	effective_domain_size	source_order
query_1	TRUE	9.87465e-09	6493	117	72	0.615385	0.0110889	GO:0023052	GO:BP	signaling	21110	7002
query_1	TRUE	1.79449e-08	2890	115	45	0.391304	0.0155709	GO:0007166	GO:BP	cell surface receptor signaling pathway	21110	2793
query_1	TRUE	2.41099e-08	6604	117	72	0.615385	0.0109025	GO:0007154	GO:BP	cell communication	21110	2781
query_1	TRUE	3.50111e-08	6034	131	74	0.564885	0.0122638	GO:0007165	GO:BP	signal transduction	21110	2792
query_1	TRUE	1.851e-06	3987	149	60	0.402685	0.0150489	GO:0048731	GO:BP	system development	21110	13728
query_1	TRUE	1.68589e-05	7521	117	72	0.615385	0.0095732	GO:0051716	GO:BP	cellular response to stimulus	21110	14697
query_1	TRUE	2.71647e-05	599	125	18	0.144	0.0300501	GO:0003013	GO:BP	circulatory system process	21110	1483
query_1	TRUE	3.6659e-05	1076	99	21	0.212121	0.0195167	GO:0009887	GO:BP	animal organ morphogenesis	21110	3825
query_1	TRUE	4.24554e-05	4658	149	63	0.422819	0.0135251	GO:0007275	GO:BP	multicellular organism development	21110	2871
query_1	TRUE	4.2665e-05	2008	153	38	0.248366	0.0189243	GO:0009888	GO:BP	tissue development	21110	3826
query_1	TRUE	4.90726e-05	265	117	12	0.102564	0.045283	GO:0003018	GO:BP	vascular process in circulatory system	21110	1488
query_1	TRUE	0.000112555	4318	149	59	0.395973	0.0136637	GO:0030154	GO:BP	cell differentiation	21110	7050
query_1	TRUE	0.000137438	990	115	21	0.182609	0.0212121	GO:0007167	GO:BP	enzyme-linked receptor protein signaling pathway	21110	2794
query_1	TRUE	0.000140432	4344	149	59	0.395973	0.013582	GO:0048869	GO:BP	cellular developmental process	21110	13852
query_1	TRUE	0.000193896	2712	99	33	0.333333	0.0121681	GO:0009653	GO:BP	anatomical structure morphogenesis	21110	3648
query_1	TRUE	0.000315447	6489	149	76	0.510067	0.0117121	GO:0032502	GO:BP	developmental process	21110	8032
query_1	TRUE	0.000342301	2669	117	36	0.307692	0.0134882	GO:0035556	GO:BP	intracellular signal transduction	21110	9589
query_1	TRUE	0.000350388	927	129	21	0.162791	0.0226537	GO:0030334	GO:BP	regulation of cell migration	21110	7143
query_1	TRUE	0.00050804	1505	152	30	0.197368	0.0199336	GO:0016477	GO:BP	cell migration	21110	5356
query_1	TRUE	0.000576541	1796	78	22	0.282051	0.0122494	GO:1901700	GO:BP	response to oxygen-containing compound	21110	22661
query_1	TRUE	0.000658423	1469	117	25	0.213675	0.0170184	GO:0071495	GO:BP	cellular response to endogenous stimulus	21110	17675
query_1	TRUE	0.00066795	513	125	15	0.12	0.0292398	GO:0008015	GO:BP	blood circulation	21110	3168
query_1	TRUE	0.000669587	3128	104	36	0.346154	0.011509	GO:0048513	GO:BP	animal organ development	21110	13536
query_1	TRUE	0.000868548	36	93	5	0.0537634	0.138889	GO:0045601	GO:BP	regulation of endothelial cell differentiation	21110	12152
query_1	TRUE	0.000938407	5896	149	70	0.469799	0.0118725	GO:0048856	GO:BP	anatomical structure development	21110	13840
query_1	TRUE	0.000995555	988	129	21	0.162791	0.0212551	GO:2000145	GO:BP	regulation of cell motility	21110	26747
query_1	TRUE	0.0011712	1365	129	25	0.193798	0.018315	GO:0040011	GO:BP	locomotion	21110	10464
query_1	TRUE	0.00128313	11108	129	95	0.736434	0.00855239	GO:0050794	GO:BP	regulation of cellular process	21110	14008
query_1	TRUE	0.00150434	680	115	16	0.13913	0.0235294	GO:0071363	GO:BP	cellular response to growth factor stimulus	21110	17561
query_1	TRUE	0.00152692	1123	147	24	0.163265	0.0213713	GO:0072359	GO:BP	circulatory system development	21110	18343
query_1	TRUE	0.00165949	3003	116	37	0.318966	0.012321	GO:0009966	GO:BP	regulation of signal transduction	21110	3882
query_1	TRUE	0.00193186	2283	144	36	0.25	0.0157687	GO:0003008	GO:BP	system process	21110	1478
query_1	TRUE	0.00203913	1033	129	21	0.162791	0.0203291	GO:0040012	GO:BP	regulation of locomotion	21110	10465
query_1	TRUE	0.00225744	1705	152	31	0.203947	0.0181818	GO:0048870	GO:BP	cell motility	21110	13853
query_1	TRUE	0.00229935	143	117	8	0.0683761	0.0559441	GO:0097746	GO:BP	blood vessel diameter maintenance	21110	19807
query_1	TRUE	0.00229935	143	117	8	0.0683761	0.0559441	GO:0035296	GO:BP	regulation of tube diameter	21110	9436
query_1	TRUE	0.00242346	144	117	8	0.0683761	0.0555556	GO:0035150	GO:BP	regulation of tube size	21110	9327
query_1	TRUE	0.00253131	507	74	11	0.148649	0.0216963	GO:1901652	GO:BP	response to peptide	21110	22626
query_1	TRUE	0.0025423	4013	116	44	0.37931	0.0109644	GO:0048583	GO:BP	regulation of response to stimulus	21110	13594
query_1	TRUE	0.0025783	260	114	10	0.0877193	0.0384615	GO:0003007	GO:BP	heart morphogenesis	21110	1477
query_1	TRUE	0.00264187	710	115	16	0.13913	0.0225352	GO:0070848	GO:BP	response to growth factor	21110	17276
query_1	TRUE	0.00287173	1287	74	17	0.22973	0.013209	GO:1901701	GO:BP	cellular response to oxygen-containing compound	21110	22662
query_1	TRUE	0.00296087	636	114	15	0.131579	0.0235849	GO:0048729	GO:BP	tissue morphogenesis	21110	13726
query_1	TRUE	0.00307157	927	80	15	0.1875	0.0161812	GO:0051093	GO:BP	negative regulation of developmental process	21110	14248
query_1	TRUE	0.00347926	1720	117	26	0.222222	0.0151163	GO:0009719	GO:BP	response to endogenous stimulus	21110	3694
query_1	TRUE	0.00406279	630	149	17	0.114094	0.0269841	GO:0040008	GO:BP	regulation of growth	21110	10461
query_1	TRUE	0.00422639	4753	127	52	0.409449	0.0109405	GO:0048523	GO:BP	negative regulation of cellular process	21110	13544
query_1	TRUE	0.00463095	1538	116	24	0.206897	0.0156047	GO:0009967	GO:BP	positive regulation of signal transduction	21110	3883
query_1	TRUE	0.00475026	937	149	21	0.14094	0.022412	GO:0040007	GO:BP	growth	21110	10460
query_1	TRUE	0.00487221	3	21	2	0.0952381	0.666667	GO:0043318	GO:BP	negative regulation of cytotoxic T cell degranulation	21110	11216
query_1	TRUE	0.00487221	3	21	2	0.0952381	0.666667	GO:0043317	GO:BP	regulation of cytotoxic T cell degranulation	21110	11215
query_1	TRUE	0.00502545	3413	116	39	0.336207	0.0114269	GO:0023051	GO:BP	regulation of signaling	21110	7001
query_1	TRUE	0.00540639	3423	116	39	0.336207	0.0113935	GO:0010646	GO:BP	regulation of cell communication	21110	4388
query_1	TRUE	0.0061225	772	113	16	0.141593	0.0207254	GO:0000165	GO:BP	MAPK cascade	21110	59
query_1	TRUE	0.00695204	217	152	10	0.0657895	0.0460829	GO:0043542	GO:BP	endothelial cell migration	21110	11351
query_1	TRUE	0.00702693	2283	116	30	0.258621	0.0131406	GO:0048584	GO:BP	positive regulation of response to stimulus	21110	13595
query_1	TRUE	0.00713605	110	125	7	0.056	0.0636364	GO:0006939	GO:BP	smooth muscle contraction	21110	2634
query_1	TRUE	0.00718814	9	79	3	0.0379747	0.333333	GO:0045602	GO:BP	negative regulation of endothelial cell differentiation	21110	12153
query_1	TRUE	0.00739873	527	147	15	0.102041	0.028463	GO:0002009	GO:BP	morphogenesis of an epithelium	21110	628
query_1	TRUE	0.00834943	1530	97	21	0.216495	0.0137255	GO:0007155	GO:BP	cell adhesion	21110	2782
query_1	TRUE	0.00878854	817	110	16	0.145455	0.0195838	GO:0030029	GO:BP	actin filament-based process	21110	7015
query_1	TRUE	0.00973857	4	21	2	0.0952381	0.5	GO:0043316	GO:BP	cytotoxic T cell degranulation	21110	11214
query_1	TRUE	0.00973857	4	21	2	0.0952381	0.5	GO:2000346	GO:BP	negative regulation of hepatocyte proliferation	21110	26938
query_1	TRUE	0.0100377	2809	117	34	0.290598	0.012104	GO:0010033	GO:BP	response to organic substance	21110	3923
query_1	TRUE	0.0115037	32	3	2	0.666667	0.0625	GO:0000096	GO:BP	sulfur amino acid metabolic process	21110	44
query_1	TRUE	0.0117819	426	143	13	0.0909091	0.0305164	GO:0003012	GO:BP	muscle system process	21110	1482
query_1	TRUE	0.0121478	1742	116	25	0.215517	0.0143513	GO:0023056	GO:BP	positive regulation of signaling	21110	7003
query_1	TRUE	0.0123934	1744	116	25	0.215517	0.0143349	GO:0010647	GO:BP	positive regulation of cell communication	21110	4389
query_1	TRUE	0.0135191	1174	99	18	0.181818	0.0153322	GO:0048646	GO:BP	anatomical structure formation involved in morphogenesis	21110	13644
query_1	TRUE	0.013666	9081	117	74	0.632479	0.00814888	GO:0050896	GO:BP	response to stimulus	21110	14092
query_1	TRUE	0.0136771	679	79	12	0.151899	0.017673	GO:0045596	GO:BP	negative regulation of cell differentiation	21110	12147
query_1	TRUE	0.0148871	237	120	9	0.075	0.0379747	GO:0045444	GO:BP	fat cell differentiation	21110	12076
query_1	TRUE	0.015236	706	147	17	0.115646	0.0240793	GO:0001568	GO:BP	blood vessel development	21110	367
query_1	TRUE	0.0152594	1231	153	24	0.156863	0.0194963	GO:0060429	GO:BP	epithelium development	21110	15465
query_1	TRUE	0.0205835	184	88	7	0.0795455	0.0380435	GO:0007219	GO:BP	Notch signaling pathway	21110	2840
query_1	TRUE	0.0207536	7716	153	82	0.535948	0.0106273	GO:0032501	GO:BP	multicellular organismal process	21110	8031
query_1	TRUE	0.0233426	112	147	7	0.047619	0.0625	GO:0045446	GO:BP	endothelial cell differentiation	21110	12078
query_1	TRUE	0.0246496	429	152	13	0.0855263	0.030303	GO:0001667	GO:BP	ameboidal-type cell migration	21110	392
query_1	TRUE	0.0247849	672	113	14	0.123894	0.0208333	GO:0043408	GO:BP	regulation of MAPK cascade	21110	11266
query_1	TRUE	0.0265405	737	147	17	0.115646	0.0230665	GO:0001944	GO:BP	vasculature development	21110	570
query_1	TRUE	0.028107	664	131	15	0.114504	0.0225904	GO:0061061	GO:BP	muscle structure development	21110	16048
query_1	TRUE	0.0281269	311	152	11	0.0723684	0.0353698	GO:0090130	GO:BP	tissue migration	21110	19053
query_1	TRUE	0.0291806	367	85	9	0.105882	0.0245232	GO:0031589	GO:BP	cell-substrate adhesion	21110	7637
query_1	TRUE	0.0306219	594	147	15	0.102041	0.0252525	GO:0007507	GO:BP	heart development	21110	3064
query_1	TRUE	0.0371515	341	143	11	0.0769231	0.0322581	GO:0006936	GO:BP	muscle contraction	21110	2632
query_1	TRUE	0.0397388	449	152	13	0.0855263	0.0289532	GO:0050673	GO:BP	epithelial cell proliferation	21110	13951
query_1	TRUE	0.039937	2482	145	35	0.241379	0.0141015	GO:0050793	GO:BP	regulation of developmental process	21110	14007
query_1	TRUE	0.0460948	250	131	9	0.0687023	0.036	GO:0045926	GO:BP	negative regulation of growth	21110	12422
query_1	TRUE	8.39768e-08	2230	141	41	0.29078	0.0183857	GO:0030054	GO:CC	cell junction	22122	871
query_1	TRUE	6.002e-07	902	127	23	0.181102	0.0254989	GO:0070161	GO:CC	anchoring junction	22122	2447
query_1	TRUE	2.15009e-06	511	127	17	0.133858	0.0332681	GO:0005911	GO:CC	cell-cell junction	22122	441
query_1	TRUE	1.63636e-05	6303	129	66	0.511628	0.0104712	GO:0071944	GO:CC	cell periphery	22122	2801
query_1	TRUE	7.82219e-05	1292	125	24	0.192	0.0185759	GO:0098590	GO:CC	plasma membrane region	22122	3226
query_1	TRUE	0.000537718	5819	129	59	0.457364	0.0101392	GO:0005886	GO:CC	plasma membrane	22122	424
query_1	TRUE	0.00248162	182	120	8	0.0666667	0.043956	GO:0005912	GO:CC	adherens junction	22122	442
query_1	TRUE	0.0065583	9878	119	76	0.638655	0.00769387	GO:0016020	GO:CC	membrane	22122	722
query_1	TRUE	0.0184748	100	145	6	0.0413793	0.06	GO:0005604	GO:CC	basement membrane	22122	223
query_1	TRUE	0.0318464	182	127	7	0.0551181	0.0384615	GO:0044309	GO:CC	neuron spine	22122	2068
query_1	TRUE	0.0353188	435	139	11	0.0791367	0.0252874	GO:0030055	GO:CC	cell-substrate junction	22122	872
query_1	TRUE	0.0465588	430	145	11	0.0758621	0.0255814	GO:0062023	GO:CC	collagen-containing extracellular matrix	22122	2367
query_1	TRUE	0.000798214	727	145	19	0.131034	0.0261348	GO:0005509	GO:MF	calcium ion binding	20195	1495
query_1	TRUE	0.0153528	709	121	15	0.123967	0.0211566	GO:0019901	GO:MF	protein kinase binding	20195	3756
query_1	TRUE	0.0109712	95	131	8	0.0610687	0.0842105	KEGG:01522	KEGG	Endocrine resistance	8161	196
query_1	TRUE	8.4742e-08	9527	153	113	0.738562	0.011861	TF:M10432	TF	Factor: MAZ; motif: GGGMGGGGS	20011	4996
query_1	TRUE	5.11929e-07	9389	154	111	0.720779	0.0118223	TF:M01857	TF	Factor: AP-2alpha; motif: NGCCYSNNGSN	20011	134
query_1	TRUE	7.2551e-06	9325	154	108	0.701299	0.0115818	TF:M03876_1	TF	Factor: Kaiso; motif: GCMGGGRGCRGS; match class: 1	20011	4525
query_1	TRUE	6.19851e-05	8430	154	99	0.642857	0.0117438	TF:M12351_1	TF	Factor: TIEG1; motif: NCCCNSNCCCCGCCCCC; match class: 1	20011	8783
query_1	TRUE	8.26316e-05	9784	131	95	0.725191	0.00970973	TF:M09984	TF	Factor: MAZ; motif: GGGGGAGGGGGNGRGRRRGNRG	20011	4994
query_1	TRUE	8.3135e-05	4494	138	60	0.434783	0.0133511	TF:M10432_1	TF	Factor: MAZ; motif: GGGMGGGGS; match class: 1	20011	4997
query_1	TRUE	0.000114616	6657	154	84	0.545455	0.0126183	TF:M07436	TF	Factor: WT1; motif: NNGGGNGGGSGN	20011	8982
query_1	TRUE	0.000131577	2818	57	25	0.438596	0.00887154	TF:M09739_1	TF	Factor: ZGPAT; motif: GRGGCWGNGGNG; match class: 1	20011	9345
query_1	TRUE	0.000144206	8619	153	99	0.647059	0.0114863	TF:M10026	TF	Factor: PATZ; motif: GGGGNGGGGGMKGGRRNGGNRN	20011	6318
query_1	TRUE	0.000168474	12959	128	110	0.859375	0.00848831	TF:M07040	TF	Factor: GKLF; motif: NNRRGRRNGNSNNN	20011	3166
query_1	TRUE	0.000260157	7744	154	92	0.597403	0.0118802	TF:M01100	TF	Factor: LRF; motif: GGGGKYNNB	20011	4798
query_1	TRUE	0.000320227	7899	154	93	0.603896	0.0117736	TF:M10435	TF	Factor: Sp2; motif: GGGGCGGGG	20011	7870
query_1	TRUE	0.000328216	2424	145	41	0.282759	0.0169142	TF:M00245_1	TF	Factor: Egr-3; motif: NTGCGTGGGCGK; match class: 1	20011	1651
query_1	TRUE	0.000330792	3757	152	56	0.368421	0.0149055	TF:M07354_1	TF	Factor: Egr-1; motif: GCGGGGGCGG; match class: 1	20011	1631
query_1	TRUE	0.000374594	2297	153	41	0.267974	0.0178494	TF:M12508_1	TF	Factor: EGR1; motif: NNMCGCCCACGCNN; match class: 1	20011	1629
query_1	TRUE	0.000458152	3624	143	52	0.363636	0.0143488	TF:M00982_1	TF	Factor: KROX; motif: CCCGCCCCCRCCCC; match class: 1	20011	4613
query_1	TRUE	0.000524094	10824	65	55	0.846154	0.0050813	TF:M12722	TF	Factor: ZXDL; motif: GSGSCNNGGGMRGCNCCGGGS	20011	11646
query_1	TRUE	0.000584125	9957	154	108	0.701299	0.0108466	TF:M12725	TF	Factor: PHB; motif: NCCCAGCCCCY	20011	6540
query_1	TRUE	0.000606436	6819	93	56	0.602151	0.00821235	TF:M12722_1	TF	Factor: ZXDL; motif: GSGSCNNGGGMRGCNCCGGGS; match class: 1	20011	11647
query_1	TRUE	0.000629158	6063	154	77	0.5	0.0127	TF:M12227_1	TF	Factor: ZIC4; motif: NNCCNCCCRYNGYGN; match class: 1	20011	9373
query_1	TRUE	0.0006297	13918	131	116	0.885496	0.00833453	TF:M03876	TF	Factor: Kaiso; motif: GCMGGGRGCRGS	20011	4524
query_1	TRUE	0.000679722	8225	139	87	0.625899	0.0105775	TF:M11478_1	TF	Factor: AP-2beta; motif: NSCCNNNGGSN; match class: 1	20011	8581
query_1	TRUE	0.00096139	9627	154	105	0.681818	0.0109068	TF:M02089_1	TF	Factor: E2F-3; motif: GGCGGGN; match class: 1	20011	1497
query_1	TRUE	0.00105148	11163	145	110	0.758621	0.00985398	TF:M12354	TF	Factor: ZNF37A; motif: CCYYGGCTCCNTSCCMN	20011	10096
query_1	TRUE	0.00118553	10555	131	97	0.740458	0.00918996	TF:M00931	TF	Factor: Sp1; motif: GGGGCGGGGC	20011	7856
query_1	TRUE	0.00128392	7853	154	91	0.590909	0.0115879	TF:M09826_1	TF	Factor: BTEB3; motif: CCNNSCCNSCCCCKCCCCC; match class: 1	20011	627
query_1	TRUE	0.00147706	5419	153	70	0.457516	0.0129175	TF:M09658	TF	Factor: Sp2; motif: GGSNNGGGGGCGGGGCCNGNGS	20011	7868
query_1	TRUE	0.0015079	10522	154	111	0.720779	0.0105493	TF:M01104	TF	Factor: MOVO-B; motif: GNGGGGG	20011	5238
query_1	TRUE	0.00153664	5724	154	73	0.474026	0.0127533	TF:M00470_1	TF	Factor: AP-2gamma; motif: GCCYNNGGS; match class: 1	20011	139
query_1	TRUE	0.00186405	10417	154	110	0.714286	0.0105597	TF:M09723	TF	Factor: BTEB1; motif: GGGGGCGGGGCNGSGGGNGS	20011	612
query_1	TRUE	0.00195114	8362	153	94	0.614379	0.0112413	TF:M07040_1	TF	Factor: GKLF; motif: NNRRGRRNGNSNNN; match class: 1	20011	3167
query_1	TRUE	0.00196404	10705	154	112	0.727273	0.0104624	TF:M00932	TF	Factor: Sp1; motif: NNGGGGCGGGGNN	20011	7852
query_1	TRUE	0.00315867	8118	154	92	0.597403	0.0113328	TF:M01303	TF	Factor: SP1; motif: GGGGYGGGGNS	20011	7824
query_1	TRUE	0.00317738	5985	153	74	0.48366	0.0123642	TF:M10107	TF	Factor: DB1; motif: GGRRRRGRRGGAGGGGGNGRRR	20011	1196
query_1	TRUE	0.00324128	5299	153	68	0.444444	0.0128326	TF:M08867_1	TF	Factor: AP2; motif: GCCYGSGGSN; match class: 1	20011	153
query_1	TRUE	0.00328681	4243	138	54	0.391304	0.0127268	TF:M12648	TF	Factor: PATZ1; motif: SCNCCNCNSCCCCCASCCN	20011	6320
query_1	TRUE	0.00346869	4716	154	63	0.409091	0.0133588	TF:M01857_1	TF	Factor: AP-2alpha; motif: NGCCYSNNGSN; match class: 1	20011	135
query_1	TRUE	0.00356312	7570	153	87	0.568627	0.0114927	TF:M04595_1	TF	Factor: SALL2; motif: GGGTGGG; match class: 1	20011	7427
query_1	TRUE	0.00371331	14426	131	117	0.89313	0.00811036	TF:M09636_1	TF	Factor: MAZ; motif: GGGMGGGGSSGGGGGGGGGGGG; match class: 1	20011	4993
query_1	TRUE	0.0041142	2173	151	37	0.245033	0.0170272	TF:M03896_1	TF	Factor: EGR1; motif: NACGCCCACGCANW; match class: 1	20011	1605
query_1	TRUE	0.00428426	8747	153	96	0.627451	0.0109752	TF:M09727	TF	Factor: GEMIN3; motif: NCWGGRARRGRGNGNG	20011	3136
query_1	TRUE	0.0043058	11118	154	114	0.74026	0.0102536	TF:M09973	TF	Factor: CPBP; motif: GNNRGGGHGGGGNNGGGRN	20011	944
query_1	TRUE	0.004343	10280	154	108	0.701299	0.0105058	TF:M08867	TF	Factor: AP2; motif: GCCYGSGGSN	20011	152
query_1	TRUE	0.00462621	8251	143	87	0.608392	0.0105442	TF:M07348	TF	Factor: AP-2alpha; motif: NSCCNCRGGSN	20011	132
query_1	TRUE	0.00473139	7066	154	83	0.538961	0.0117464	TF:M10529	TF	Factor: Sp1; motif: RGGGMGGRGSNGGGG	20011	7838
query_1	TRUE	0.00513524	5706	153	71	0.464052	0.012443	TF:M09984_1	TF	Factor: MAZ; motif: GGGGGAGGGGGNGRGRRRGNRG; match class: 1	20011	4995
query_1	TRUE	0.00529816	10886	115	87	0.756522	0.00799192	TF:M09729	TF	Factor: LUMAN; motif: CYCAGCYYCY	20011	4828
query_1	TRUE	0.0056513	13508	131	112	0.854962	0.00829138	TF:M02089	TF	Factor: E2F-3; motif: GGCGGGN	20011	1496
query_1	TRUE	0.0056566	5952	153	73	0.477124	0.0122648	TF:M11480_1	TF	Factor: AP-2alpha; motif: NGCCTSAGGCN; match class: 1	20011	8569
query_1	TRUE	0.00645736	8488	154	94	0.61039	0.0110745	TF:M07226	TF	Factor: SP1; motif: NCCCCKCCCCC	20011	7832
query_1	TRUE	0.00652132	5813	154	72	0.467532	0.012386	TF:M01104_1	TF	Factor: MOVO-B; motif: GNGGGGG; match class: 1	20011	5239
query_1	TRUE	0.00721667	847	143	20	0.13986	0.0236128	TF:M00807_1	TF	Factor: Egr; motif: GTGGGSGCRRS; match class: 1	20011	1673
query_1	TRUE	0.00780289	5579	65	36	0.553846	0.00645277	TF:M01837	TF	Factor: FKLF; motif: BGGGNGGVMD	20011	2418
query_1	TRUE	0.00891175	6802	154	80	0.519481	0.0117612	TF:M09973_1	TF	Factor: CPBP; motif: GNNRGGGHGGGGNNGGGRN; match class: 1	20011	945
query_1	TRUE	0.00918781	10824	154	111	0.720779	0.010255	TF:M07289_1	TF	Factor: GKLF; motif: NNNRGGNGNGGSN; match class: 1	20011	3169
query_1	TRUE	0.00937215	5751	154	71	0.461039	0.0123457	TF:M12354_1	TF	Factor: ZNF37A; motif: CCYYGGCTCCNTSCCMN; match class: 1	20011	10097
query_1	TRUE	0.00944675	10931	131	97	0.740458	0.00887385	TF:M07395	TF	Factor: Sp1; motif: NGGGGCGGGGN	20011	7848
query_1	TRUE	0.0100789	9629	152	101	0.664474	0.0104891	TF:M00470	TF	Factor: AP-2gamma; motif: GCCYNNGGS	20011	138
query_1	TRUE	0.0111749	4763	154	62	0.402597	0.013017	TF:M09603	TF	Factor: Egr-1; motif: NNNNNGYGKGGGNGGGNN	20011	1618
query_1	TRUE	0.0113584	6414	148	74	0.5	0.0115373	TF:M10072_1	TF	Factor: sp4; motif: NNGNARGRGGCGGRGCNNRR; match class: 1	20011	7895
query_1	TRUE	0.011577	7207	154	83	0.538961	0.0115166	TF:M00695_1	TF	Factor: ETF; motif: GVGGMGG; match class: 1	20011	2165
query_1	TRUE	0.0118494	10179	139	97	0.697842	0.00952942	TF:M11478	TF	Factor: AP-2beta; motif: NSCCNNNGGSN	20011	8580
query_1	TRUE	0.0120425	6302	138	69	0.5	0.0109489	TF:M11480	TF	Factor: AP-2alpha; motif: NGCCTSAGGCN	20011	8568
query_1	TRUE	0.0122833	1076	138	22	0.15942	0.0204461	TF:M07387_1	TF	Factor: LRF; motif: NGKGGGTSNCN; match class: 1	20011	4801
query_1	TRUE	0.0128325	5454	154	68	0.441558	0.0124679	TF:M02036_1	TF	Factor: WT1; motif: CGCCCCCNCN; match class: 1	20011	8987
query_1	TRUE	0.013406	6688	148	76	0.513514	0.0113636	TF:M10108	TF	Factor: WT1; motif: RGGNGGGGGAGGRGGNGGRG	20011	8980
query_1	TRUE	0.0141148	11899	154	118	0.766234	0.0099168	TF:M09826	TF	Factor: BTEB3; motif: CCNNSCCNSCCCCKCCCCC	20011	626
query_1	TRUE	0.0142968	9389	110	75	0.681818	0.00798807	TF:M12732	TF	Factor: ZNF532; motif: NGGRGCTGGG	20011	10508
query_1	TRUE	0.0161746	6300	154	75	0.487013	0.0119048	TF:M09723_1	TF	Factor: BTEB1; motif: GGGGGCGGGGCNGSGGGNGS; match class: 1	20011	613
query_1	TRUE	0.0170467	10654	154	109	0.707792	0.0102309	TF:M00986_1	TF	Factor: Churchill; motif: CGGGNN; match class: 1	20011	835
query_1	TRUE	0.0180651	5150	66	34	0.515152	0.00660194	TF:M00143_1	TF	Factor: Pax-5; motif: BCNNNRNGCANBGNTGNRTAGCSGCHNB; match class: 1	20011	6385
query_1	TRUE	0.018757	7544	143	80	0.559441	0.0106045	TF:M07486_1	TF	Factor: ZNF300; motif: SWGGGGGSN; match class: 1	20011	9901
query_1	TRUE	0.021096	8103	143	84	0.587413	0.0103665	TF:M07354	TF	Factor: Egr-1; motif: GCGGGGGCGG	20011	1630
query_1	TRUE	0.0214305	8744	138	86	0.623188	0.00983532	TF:M04863_1	TF	Factor: TF3C-beta; motif: CCNGGAGGGCTTCCTGGAGGAG; match class: 1	20011	3303
query_1	TRUE	0.0216174	4745	154	61	0.396104	0.0128556	TF:M10071_1	TF	Factor: Sp1; motif: NGGGGGCGGGGCCNGGGGGGGG; match class: 1	20011	7837
query_1	TRUE	0.023275	5335	139	61	0.438849	0.0114339	TF:M07387	TF	Factor: LRF; motif: NGKGGGTSNCN	20011	4800
query_1	TRUE	0.0233055	5279	152	65	0.427632	0.0123129	TF:M00469	TF	Factor: AP-2alpha; motif: GCCNNNRGS	20011	126
query_1	TRUE	0.0237286	2711	147	40	0.272109	0.0147547	TF:M07436_1	TF	Factor: WT1; motif: NNGGGNGGGSGN; match class: 1	20011	8983
query_1	TRUE	0.025733	1699	129	27	0.209302	0.0158917	TF:M12489_1	TF	Factor: KLF4; motif: NNCCCCACCCNN; match class: 1	20011	4589
query_1	TRUE	0.0272844	6985	147	77	0.52381	0.0110236	TF:M07615	TF	Factor: Sp3; motif: GGGGCGGGGSNN	20011	7890
query_1	TRUE	0.0277419	2750	151	41	0.271523	0.0149091	TF:M01873_1	TF	Factor: Egr-1; motif: GCGGGGGCGG; match class: 1	20011	1633
query_1	TRUE	0.029245	2633	147	39	0.265306	0.014812	TF:M09898_1	TF	Factor: Egr-2; motif: GNGRRNGWGKGGGNGGRG; match class: 1	20011	1641
query_1	TRUE	0.0298411	4137	154	55	0.357143	0.0132947	TF:M09910_1	TF	Factor: ER-beta; motif: RGGTCASCNTGMCCY; match class: 1	20011	2113
query_1	TRUE	0.0307444	4273	57	27	0.473684	0.00631875	TF:M09862_1	TF	Factor: ZNF614; motif: NCYCWGCCYYNNN; match class: 1	20011	10801
query_1	TRUE	0.0320434	6888	154	79	0.512987	0.0114692	TF:M01873	TF	Factor: Egr-1; motif: GCGGGGGCGG	20011	1632
query_1	TRUE	0.0322148	10509	131	93	0.709924	0.00884956	TF:M00196	TF	Factor: Sp1; motif: NGGGGGCGGGGYN	20011	7854
query_1	TRUE	0.0340333	4371	154	57	0.37013	0.0130405	TF:M00800_1	TF	Factor: AP-2; motif: GSCCSCRGGCNRNRNN; match class: 1	20011	151
query_1	TRUE	0.0352373	1484	149	27	0.181208	0.0181941	TF:M04617_1	TF	Factor: LRF; motif: NGNAGNGGGTYN; match class: 1	20011	4803
query_1	TRUE	0.0356723	5195	138	59	0.427536	0.0113571	TF:M04147	TF	Factor: TFAP2A; motif: NGCCYSAGGCN	20011	8556
query_1	TRUE	0.03605	8018	154	88	0.571429	0.0109753	TF:M00982	TF	Factor: KROX; motif: CCCGCCCCCRCCCC	20011	4612
query_1	TRUE	0.0383091	1365	153	26	0.169935	0.0190476	TF:M09603_1	TF	Factor: Egr-1; motif: NNNNNGYGKGGGNGGGNN; match class: 1	20011	1619
query_1	TRUE	0.0385898	679	106	14	0.132075	0.0206186	TF:M07042_1	TF	Factor: HES-1; motif: NNCKYGTGNNN; match class: 1	20011	3345
query_1	TRUE	0.044509	7300	97	56	0.57732	0.00767123	TF:M02023	TF	Factor: MAZ; motif: NKGGGAGGGGRGGR	20011	5004
query_1	TRUE	0.0449111	5903	148	68	0.459459	0.0115196	TF:M04896	TF	Factor: AP-2alpha; motif: NNNGSCCTGRGGSN	20011	8560
query_1	TRUE	0.0492933	4846	145	58	0.4	0.0119686	TF:M12704_1	TF	Factor: ZNF432; motif: NCAGNRCCNSRGRCAGC; match class: 1	20011	10233
query_1	TRUE	0.0494489	8711	154	93	0.603896	0.0106762	TF:M10112	TF	Factor: Miz-1; motif: NNRGGWGGGGGAGGGGMRR	20011	5200

## Sheet: GO_LB vs iSB_DOWN DEGs
query	significant	p_value	term_size	query_size	intersection_size	precision	recall	term_id	source	term_name	effective_domain_size	source_order
query_1	TRUE	0.000254601	3987	38	22	0.578947	0.00551793	GO:0048731	GO:BP	system development	21110	13728
query_1	TRUE	0.000726369	990	191	27	0.141361	0.0272727	GO:0007167	GO:BP	enzyme-linked receptor protein signaling pathway	21110	2794
query_1	TRUE	0.0011029	4318	38	22	0.578947	0.00509495	GO:0030154	GO:BP	cell differentiation	21110	7050
query_1	TRUE	0.00123011	4344	38	22	0.578947	0.00506446	GO:0048869	GO:BP	cellular developmental process	21110	13852
query_1	TRUE	0.00127405	3413	347	92	0.26513	0.0269558	GO:0023051	GO:BP	regulation of signaling	21110	7001
query_1	TRUE	0.00145285	3423	347	92	0.26513	0.026877	GO:0010646	GO:BP	regulation of cell communication	21110	4388
query_1	TRUE	0.00176647	185	573	19	0.0331588	0.102703	GO:0007565	GO:BP	female pregnancy	21110	3114
query_1	TRUE	0.00210025	4013	351	104	0.296296	0.0259158	GO:0048583	GO:BP	regulation of response to stimulus	21110	13594
query_1	TRUE	0.00210112	4658	291	100	0.343643	0.0214684	GO:0007275	GO:BP	multicellular organism development	21110	2871
query_1	TRUE	0.00282708	5615	193	82	0.42487	0.0146037	GO:0048522	GO:BP	positive regulation of cellular process	21110	13543
query_1	TRUE	0.00299723	599	376	29	0.0771277	0.048414	GO:0003013	GO:BP	circulatory system process	21110	1483
query_1	TRUE	0.0031162	5896	38	25	0.657895	0.00424016	GO:0048856	GO:BP	anatomical structure development	21110	13840
query_1	TRUE	0.00347206	1720	296	49	0.165541	0.0284884	GO:0009719	GO:BP	response to endogenous stimulus	21110	3694
query_1	TRUE	0.00397499	3003	347	82	0.236311	0.027306	GO:0009966	GO:BP	regulation of signal transduction	21110	3882
query_1	TRUE	0.00452762	6358	193	89	0.46114	0.0139981	GO:0048518	GO:BP	positive regulation of biological process	21110	13539
query_1	TRUE	0.00452791	11108	326	213	0.653374	0.0191754	GO:0050794	GO:BP	regulation of cellular process	21110	14008
query_1	TRUE	0.00454799	3128	38	18	0.473684	0.00575448	GO:0048513	GO:BP	animal organ development	21110	13536
query_1	TRUE	0.00455117	6489	38	26	0.684211	0.00400678	GO:0032502	GO:BP	developmental process	21110	8032
query_1	TRUE	0.0052558	2890	290	69	0.237931	0.0238754	GO:0007166	GO:BP	cell surface receptor signaling pathway	21110	2793
query_1	TRUE	0.00595269	102	45	5	0.111111	0.0490196	GO:0006641	GO:BP	triglyceride metabolic process	21110	2406
query_1	TRUE	0.00665476	680	290	26	0.0896552	0.0382353	GO:0071363	GO:BP	cellular response to growth factor stimulus	21110	17561
query_1	TRUE	0.00739886	1469	191	32	0.167539	0.0217835	GO:0071495	GO:BP	cellular response to endogenous stimulus	21110	17675
query_1	TRUE	0.00779699	260	289	15	0.0519031	0.0576923	GO:0003007	GO:BP	heart morphogenesis	21110	1477
query_1	TRUE	0.00834279	7716	38	28	0.736842	0.00362882	GO:0032501	GO:BP	multicellular organismal process	21110	8031
query_1	TRUE	0.00889242	206	573	19	0.0331588	0.092233	GO:0044703	GO:BP	multi-organism reproductive process	21110	11803
query_1	TRUE	0.0104013	2669	169	43	0.254438	0.0161109	GO:0035556	GO:BP	intracellular signal transduction	21110	9589
query_1	TRUE	0.0118266	564	338	25	0.0739645	0.0443262	GO:1903530	GO:BP	regulation of secretion by cell	21110	24181
query_1	TRUE	0.012509	59	347	8	0.0230548	0.135593	GO:0051058	GO:BP	negative regulation of small GTPase mediated signal transduction	21110	14228
query_1	TRUE	0.0144283	710	290	26	0.0896552	0.0366197	GO:0070848	GO:BP	response to growth factor	21110	17276
query_1	TRUE	0.0147633	884	338	33	0.0976331	0.0373303	GO:0140352	GO:BP	export from cell	21110	20837
query_1	TRUE	0.0150653	5	183	3	0.0163934	0.6	GO:0046865	GO:BP	terpenoid transport	21110	13126
query_1	TRUE	0.0150653	5	183	3	0.0163934	0.6	GO:0046864	GO:BP	isoprenoid transport	21110	13125
query_1	TRUE	0.0177396	216	573	19	0.0331588	0.087963	GO:0044706	GO:BP	multi-multicellular organism process	21110	11804
query_1	TRUE	0.0180524	2586	86	26	0.302326	0.0100541	GO:0065009	GO:BP	regulation of molecular function	21110	16813
query_1	TRUE	0.0181597	111	321	10	0.0311526	0.0900901	GO:0002793	GO:BP	positive regulation of peptide secretion	21110	1323
query_1	TRUE	0.0195722	130	45	5	0.111111	0.0384615	GO:0006639	GO:BP	acylglycerol metabolic process	21110	2404
query_1	TRUE	0.0203167	131	45	5	0.111111	0.0381679	GO:0006638	GO:BP	neutral lipid metabolic process	21110	2403
query_1	TRUE	0.0225116	3	38	2	0.0526316	0.666667	GO:0043317	GO:BP	regulation of cytotoxic T cell degranulation	21110	11215
query_1	TRUE	0.0225116	3	38	2	0.0526316	0.666667	GO:0043318	GO:BP	negative regulation of cytotoxic T cell degranulation	21110	11216
query_1	TRUE	0.0238551	6604	343	145	0.422741	0.0219564	GO:0007154	GO:BP	cell communication	21110	2781
query_1	TRUE	0.0245406	6493	343	143	0.41691	0.0220237	GO:0023052	GO:BP	signaling	21110	7002
query_1	TRUE	0.0254232	7521	193	98	0.507772	0.0130302	GO:0051716	GO:BP	cellular response to stimulus	21110	14697
query_1	TRUE	0.0261704	138	45	5	0.111111	0.0362319	GO:0008203	GO:BP	cholesterol metabolic process	21110	3202
query_1	TRUE	0.0291036	6034	193	83	0.430052	0.0137554	GO:0007165	GO:BP	signal transduction	21110	2792
query_1	TRUE	0.035856	108	155	7	0.0451613	0.0648148	GO:0002456	GO:BP	T cell mediated immunity	21110	997
query_1	TRUE	0.0367314	148	45	5	0.111111	0.0337838	GO:1902652	GO:BP	secondary alcohol metabolic process	21110	23465
query_1	TRUE	0.0392732	2115	338	59	0.174556	0.027896	GO:0032879	GO:BP	regulation of localization	21110	8303
query_1	TRUE	0.040142	1728	169	31	0.183432	0.0179398	GO:1902531	GO:BP	regulation of intracellular signal transduction	21110	23381
query_1	TRUE	0.0441415	513	376	24	0.0638298	0.0467836	GO:0008015	GO:BP	blood circulation	21110	3168
query_1	TRUE	0.0445024	154	45	5	0.111111	0.0324675	GO:0016125	GO:BP	sterol metabolic process	21110	5267
query_1	TRUE	0.0447293	41	289	6	0.0207612	0.146341	GO:0003203	GO:BP	endocardial cushion morphogenesis	21110	1658
query_1	TRUE	0.0449721	4	38	2	0.0526316	0.5	GO:0043316	GO:BP	cytotoxic T cell degranulation	21110	11214
query_1	TRUE	0.0449721	4	38	2	0.0526316	0.5	GO:2000346	GO:BP	negative regulation of hepatocyte proliferation	21110	26938
query_1	TRUE	0.0475223	1744	347	52	0.149856	0.0298165	GO:0010647	GO:BP	positive regulation of cell communication	21110	4389
query_1	TRUE	0.00899534	434	62	8	0.129032	0.0184332	GO:0005819	GO:CC	spindle	22122	371
query_1	TRUE	0.012534	2412	70	20	0.285714	0.00829187	GO:0005856	GO:CC	cytoskeleton	22122	401
query_1	TRUE	0.0271671	6303	279	109	0.390681	0.0172934	GO:0071944	GO:CC	cell periphery	22122	2801
query_1	TRUE	0.029545	2	1	1	1	0.5	GO:0034667	GO:CC	integrin alpha3-beta1 complex	22122	1516
query_1	TRUE	0.0443175	3	1	1	1	0.333333	GO:1990812	GO:CC	growth cone filopodium	22122	4010
query_1	TRUE	0.0493167	87	291	7	0.024055	0.0804598	GO:0048786	GO:CC	presynaptic active zone	22122	2249
query_1	TRUE	0.0052141	284	213	13	0.0610329	0.0457746	GO:0005096	GO:MF	GTPase activator activity	20195	1280
query_1	TRUE	0.00553803	709	143	17	0.118881	0.0239774	GO:0019901	GO:MF	protein kinase binding	20195	3756
query_1	TRUE	0.00724139	2057	217	43	0.198157	0.0209042	GO:0098772	GO:MF	molecular function regulator activity	20195	9275
query_1	TRUE	0.0142388	2093	61	18	0.295082	0.0086001	GO:0019899	GO:MF	enzyme binding	20195	3754
query_1	TRUE	0.0225279	792	143	17	0.118881	0.0214646	GO:0019900	GO:MF	kinase binding	20195	3755
query_1	TRUE	0.029439	1321	234	32	0.136752	0.0242241	GO:0140677	GO:MF	molecular function activator activity	20195	10737
query_1	TRUE	0.038121	11	462	4	0.00865801	0.363636	GO:0005131	GO:MF	growth hormone receptor binding	20195	1303
query_1	TRUE	0.0436556	123	526	12	0.0228137	0.097561	GO:1990782	GO:MF	protein tyrosine kinase binding	20195	11210
query_1	TRUE	0.0441536	33	462	6	0.012987	0.181818	GO:0051427	GO:MF	hormone receptor binding	20195	8054
query_1	TRUE	0.0381557	202	15	4	0.266667	0.019802	KEGG:04510	KEGG	Focal adhesion	8161	307
query_1	TRUE	1.20759e-08	9629	433	279	0.644342	0.028975	TF:M00470	TF	Factor: AP-2gamma; motif: GCCYNNGGS	20011	138
query_1	TRUE	3.40542e-07	5724	431	185	0.429234	0.0323201	TF:M00470_1	TF	Factor: AP-2gamma; motif: GCCYNNGGS; match class: 1	20011	139
query_1	TRUE	1.57413e-05	6063	393	173	0.440204	0.0285337	TF:M12227_1	TF	Factor: ZIC4; motif: NNCCNCCCRYNGYGN; match class: 1	20011	9373
query_1	TRUE	2.175e-05	8549	385	220	0.571429	0.025734	TF:M09591	TF	Factor: AP-2gamma; motif: NTGSCCTGRGGSNN	20011	8608
query_1	TRUE	2.39072e-05	9627	393	245	0.62341	0.0254493	TF:M02089_1	TF	Factor: E2F-3; motif: GGCGGGN; match class: 1	20011	1497
query_1	TRUE	2.91859e-05	5903	372	161	0.432796	0.0272743	TF:M04896	TF	Factor: AP-2alpha; motif: NNNGSCCTGRGGSN	20011	8560
query_1	TRUE	6.37992e-05	10555	265	184	0.69434	0.0174325	TF:M00931	TF	Factor: Sp1; motif: GGGGCGGGGC	20011	7856
query_1	TRUE	7.18348e-05	8251	414	226	0.545894	0.0273906	TF:M07348	TF	Factor: AP-2alpha; motif: NSCCNCRGGSN	20011	132
query_1	TRUE	7.36914e-05	13508	382	306	0.801047	0.0226532	TF:M02089	TF	Factor: E2F-3; motif: GGCGGGN	20011	1496
query_1	TRUE	8.73755e-05	5661	415	169	0.407229	0.0298534	TF:M04152_1	TF	Factor: TFAP2C; motif: NGCCCNNRGGCA; match class: 1	20011	8601
query_1	TRUE	9.71141e-05	10522	412	271	0.657767	0.0257556	TF:M01104	TF	Factor: MOVO-B; motif: GNGGGGG	20011	5238
query_1	TRUE	0.000101628	7544	418	212	0.507177	0.0281018	TF:M07486_1	TF	Factor: ZNF300; motif: SWGGGGGSN; match class: 1	20011	9901
query_1	TRUE	0.000111778	9389	386	234	0.606218	0.0249228	TF:M01857	TF	Factor: AP-2alpha; motif: NGCCYSNNGSN	20011	134
query_1	TRUE	0.000179467	10931	263	186	0.707224	0.0170158	TF:M07395	TF	Factor: Sp1; motif: NGGGGCGGGGN	20011	7848
query_1	TRUE	0.000189086	9325	375	226	0.602667	0.0242359	TF:M03876_1	TF	Factor: Kaiso; motif: GCMGGGRGCRGS; match class: 1	20011	4525
query_1	TRUE	0.000209062	5299	449	170	0.378619	0.0320815	TF:M08867_1	TF	Factor: AP2; motif: GCCYGSGGSN; match class: 1	20011	153
query_1	TRUE	0.000285835	7872	378	199	0.526455	0.0252795	TF:M04152	TF	Factor: TFAP2C; motif: NGCCCNNRGGCA	20011	8600
query_1	TRUE	0.000322678	7116	376	183	0.486702	0.0257167	TF:M12598_1	TF	Factor: E2F3; motif: NNRGMKGGAR; match class: 1	20011	1495
query_1	TRUE	0.000326348	10705	433	285	0.658199	0.0266231	TF:M00932	TF	Factor: Sp1; motif: NNGGGGCGGGGNN	20011	7852
query_1	TRUE	0.000360448	8362	384	211	0.549479	0.0252332	TF:M07040_1	TF	Factor: GKLF; motif: NNRRGRRNGNSNNN; match class: 1	20011	3167
query_1	TRUE	0.000542313	7570	385	195	0.506494	0.0257596	TF:M04595_1	TF	Factor: SALL2; motif: GGGTGGG; match class: 1	20011	7427
query_1	TRUE	0.000550723	4716	433	149	0.344111	0.0315946	TF:M01857_1	TF	Factor: AP-2alpha; motif: NGCCYSNNGSN; match class: 1	20011	135
query_1	TRUE	0.000553157	10179	370	237	0.640541	0.0232832	TF:M11478	TF	Factor: AP-2beta; motif: NSCCNNNGGSN	20011	8580
query_1	TRUE	0.000586449	7299	370	183	0.494595	0.0250719	TF:M08208_1	TF	Factor: E2F-3:FOXI1; motif: NGACACCGCGCCCAC; match class: 1	20011	1479
query_1	TRUE	0.000594442	4729	262	99	0.377863	0.0209347	TF:M09729_1	TF	Factor: LUMAN; motif: CYCAGCYYCY; match class: 1	20011	4829
query_1	TRUE	0.000600284	9784	385	238	0.618182	0.0243254	TF:M09984	TF	Factor: MAZ; motif: GGGGGAGGGGGNGRGRRRGNRG	20011	4994
query_1	TRUE	0.000613741	10509	263	179	0.680608	0.017033	TF:M00196	TF	Factor: Sp1; motif: NGGGGGCGGGGYN	20011	7854
query_1	TRUE	0.000637118	4321	373	123	0.329759	0.0284656	TF:M03807_1	TF	Factor: SP2; motif: GNNGGGGGCGGGGSN; match class: 1	20011	7881
query_1	TRUE	0.000639239	10319	373	241	0.646113	0.023355	TF:M00008	TF	Factor: Sp1; motif: GGGGCGGGGT	20011	7822
query_1	TRUE	0.000742239	11163	391	267	0.682864	0.0239183	TF:M12354	TF	Factor: ZNF37A; motif: CCYYGGCTCCNTSCCMN	20011	10096
query_1	TRUE	0.000744703	3401	431	115	0.266821	0.0338136	TF:M00469_1	TF	Factor: AP-2alpha; motif: GCCNNNRGS; match class: 1	20011	127
query_1	TRUE	0.000761343	7853	261	143	0.547893	0.0182096	TF:M09826_1	TF	Factor: BTEB3; motif: CCNNSCCNSCCCCKCCCCC; match class: 1	20011	627
query_1	TRUE	0.000779112	3423	452	120	0.265487	0.035057	TF:M12593_1	TF	Factor: CTCF; motif: NNRSYGCCMCCTGSTGGCCN; match class: 1	20011	1153
query_1	TRUE	0.000879953	8430	266	153	0.575188	0.0181495	TF:M12351_1	TF	Factor: TIEG1; motif: NCCCNSNCCCCGCCCCC; match class: 1	20011	8783
query_1	TRUE	0.000901588	8890	369	212	0.574526	0.023847	TF:M12666	TF	Factor: SP1; motif: GGCCCCGCCCCCN	20011	7844
query_1	TRUE	0.000904141	8225	370	200	0.540541	0.0243161	TF:M11478_1	TF	Factor: AP-2beta; motif: NSCCNNNGGSN; match class: 1	20011	8581
query_1	TRUE	0.000934142	5706	395	159	0.402532	0.0278654	TF:M09984_1	TF	Factor: MAZ; motif: GGGGGAGGGGGNGRGRRRGNRG; match class: 1	20011	4995
query_1	TRUE	0.000991036	10280	386	247	0.639896	0.0240272	TF:M08867	TF	Factor: AP2; motif: GCCYGSGGSN	20011	152
query_1	TRUE	0.00111353	9527	413	247	0.598063	0.0259263	TF:M10432	TF	Factor: MAZ; motif: GGGMGGGGS	20011	4996
query_1	TRUE	0.00113644	9846	385	238	0.618182	0.0241723	TF:M00915	TF	Factor: AP-2; motif: SNNNCCNCAGGCN	20011	156
query_1	TRUE	0.00117446	3857	415	122	0.293976	0.0316308	TF:M04146_1	TF	Factor: TFAP2A; motif: YGCCCNNRGGCN; match class: 1	20011	8555
query_1	TRUE	0.00117906	14426	382	317	0.829843	0.0219742	TF:M09636_1	TF	Factor: MAZ; motif: GGGMGGGGSSGGGGGGGGGGGG; match class: 1	20011	4993
query_1	TRUE	0.00127816	10654	446	289	0.647982	0.027126	TF:M00986_1	TF	Factor: Churchill; motif: CGGGNN; match class: 1	20011	835
query_1	TRUE	0.00129296	8744	414	231	0.557971	0.0264181	TF:M04863_1	TF	Factor: TF3C-beta; motif: CCNGGAGGGCTTCCTGGAGGAG; match class: 1	20011	3303
query_1	TRUE	0.00146771	12959	382	292	0.764398	0.0225326	TF:M07040	TF	Factor: GKLF; motif: NNRRGRRNGNSNNN	20011	3166
query_1	TRUE	0.00162321	9030	283	169	0.597173	0.0187154	TF:M03811	TF	Factor: AP-2gamma; motif: GCCYNCRGSN	20011	144
query_1	TRUE	0.00207461	4371	410	132	0.321951	0.030199	TF:M00800_1	TF	Factor: AP-2; motif: GSCCSCRGGCNRNRNN; match class: 1	20011	151
query_1	TRUE	0.00216276	10786	376	249	0.662234	0.0230855	TF:M10072	TF	Factor: sp4; motif: NNGNARGRGGCGGRGCNNRR	20011	7894
query_1	TRUE	0.00222434	5150	152	67	0.440789	0.0130097	TF:M00143_1	TF	Factor: Pax-5; motif: BCNNNRNGCANBGNTGNRTAGCSGCHNB; match class: 1	20011	6385
query_1	TRUE	0.00232833	8118	376	199	0.529255	0.0245134	TF:M01303	TF	Factor: SP1; motif: GGGGYGGGGNS	20011	7824
query_1	TRUE	0.0023874	1212	363	47	0.129477	0.0387789	TF:M07137	TF	Factor: AP-2gamma; motif: NNNNSCCYCAGGSCN	20011	8606
query_1	TRUE	0.00253697	6985	409	190	0.464548	0.0272011	TF:M07615	TF	Factor: Sp3; motif: GGGGCGGGGSNN	20011	7890
query_1	TRUE	0.00284767	11118	385	260	0.675325	0.0233855	TF:M09973	TF	Factor: CPBP; motif: GNNRGGGHGGGGNNGGGRN	20011	944
query_1	TRUE	0.0036718	8823	433	240	0.554273	0.0272016	TF:M12593	TF	Factor: CTCF; motif: NNRSYGCCMCCTGSTGGCCN	20011	1152
query_1	TRUE	0.00382609	7861	367	189	0.514986	0.0240427	TF:M12726	TF	Factor: PURBETA; motif: NCWGRGGCTGGGG	20011	7042
query_1	TRUE	0.00424734	5338	385	145	0.376623	0.0271637	TF:M09590	TF	Factor: AP-2alpha; motif: NTNSCCTGRGGSNAN	20011	8564
query_1	TRUE	0.00439049	5748	392	156	0.397959	0.0271399	TF:M04918	TF	Factor: Egr-1; motif: ACCGCCC	20011	1610
query_1	TRUE	0.00458974	6986	333	158	0.474474	0.0226167	TF:M01219	TF	Factor: SP1:SP3; motif: CCSCCCCCYCC	20011	7820
query_1	TRUE	0.00505284	5215	443	160	0.361174	0.0306807	TF:M12694_1	TF	Factor: ZFP14; motif: SCNNYCCNGNNSCTSCNC; match class: 1	20011	9245
query_1	TRUE	0.00529714	10824	376	248	0.659574	0.022912	TF:M07289_1	TF	Factor: GKLF; motif: NNNRGGNGNGGSN; match class: 1	20011	3169
query_1	TRUE	0.00542907	10870	393	259	0.659033	0.023827	TF:M00189	TF	Factor: AP-2; motif: MKCCCSCNGGCG	20011	154
query_1	TRUE	0.00543936	2224	412	78	0.18932	0.0350719	TF:M11476	TF	Factor: Tcfap2e; motif: TGCCCYNNGGCN	20011	8620
query_1	TRUE	0.00551214	7744	412	206	0.5	0.0266012	TF:M01100	TF	Factor: LRF; motif: GGGGKYNNB	20011	4798
query_1	TRUE	0.00568952	6414	361	158	0.437673	0.0246336	TF:M10072_1	TF	Factor: sp4; motif: NNGNARGRGGCGGRGCNNRR; match class: 1	20011	7895
query_1	TRUE	0.00591369	2979	449	104	0.231626	0.034911	TF:M09890_1	TF	Factor: ctcf; motif: YGGCCACCAGRKGGCRSYN; match class: 1	20011	1149
query_1	TRUE	0.00593681	5093	378	137	0.362434	0.0268997	TF:M12173_1	TF	Factor: GKLF; motif: NNCCMCRCCCN; match class: 1	20011	4585
query_1	TRUE	0.00610117	6658	419	185	0.441527	0.0277861	TF:M04146	TF	Factor: TFAP2A; motif: YGCCCNNRGGCN	20011	8554
query_1	TRUE	0.00671207	6300	395	168	0.425316	0.0266667	TF:M09723_1	TF	Factor: BTEB1; motif: GGGGGCGGGGCNGSGGGNGS; match class: 1	20011	613
query_1	TRUE	0.00672145	5751	412	162	0.393204	0.028169	TF:M12354_1	TF	Factor: ZNF37A; motif: CCYYGGCTCCNTSCCMN; match class: 1	20011	10097
query_1	TRUE	0.00705077	2822	385	88	0.228571	0.0311836	TF:M01100_1	TF	Factor: LRF; motif: GGGGKYNNB; match class: 1	20011	4799
query_1	TRUE	0.007133	10508	392	251	0.640306	0.0238866	TF:M04869_1	TF	Factor: Egr-1; motif: GCGCATGCG; match class: 1	20011	1609
query_1	TRUE	0.00764707	5279	431	157	0.364269	0.0297405	TF:M00469	TF	Factor: AP-2alpha; motif: GCCNNNRGS	20011	126
query_1	TRUE	0.00777941	2976	452	104	0.230088	0.0349462	TF:M08283	TF	Factor: Fli-1:ETV7; motif: NSMGGAMGGATNTCCGNN	20011	2428
query_1	TRUE	0.00793628	5929	367	150	0.408719	0.0252994	TF:M11595_1	TF	Factor: GCMa; motif: RTGCGGGTN; match class: 1	20011	3083
query_1	TRUE	0.00800227	6304	393	167	0.424936	0.0264911	TF:M01973	TF	Factor: PLAG1; motif: CCCCCKWNNNGGSCCC	20011	6638
query_1	TRUE	0.00812592	6534	412	179	0.434466	0.0273952	TF:M07395_1	TF	Factor: Sp1; motif: NGGGGCGGGGN; match class: 1	20011	7849
query_1	TRUE	0.00899302	9111	393	224	0.569975	0.0245857	TF:M01588	TF	Factor: GKLF; motif: GCCMCRCCCNNN	20011	3162
query_1	TRUE	0.00911954	11269	368	250	0.679348	0.0221848	TF:M12590	TF	Factor: CP2; motif: NRRRCCGGCYNRARCCGGNN	20011	8662
query_1	TRUE	0.00915121	6422	449	190	0.423163	0.0295858	TF:M07063	TF	Factor: Sp1; motif: GGGGCGGGGC	20011	7850
query_1	TRUE	0.0102861	5700	412	160	0.38835	0.0280702	TF:M12728	TF	Factor: THAP7; motif: GNCGCCATSTTGRGNGKGGC	20011	8750
query_1	TRUE	0.0106342	8103	418	215	0.514354	0.0265334	TF:M07354	TF	Factor: Egr-1; motif: GCGGGGGCGG	20011	1630
query_1	TRUE	0.0113759	6657	412	181	0.43932	0.0271894	TF:M07436	TF	Factor: WT1; motif: NNGGGNGGGSGN	20011	8982
query_1	TRUE	0.011475	6239	218	100	0.458716	0.0160282	TF:M00189_1	TF	Factor: AP-2; motif: MKCCCSCNGGCG; match class: 1	20011	155
query_1	TRUE	0.0114986	11515	392	269	0.686224	0.0233608	TF:M04869	TF	Factor: Egr-1; motif: GCGCATGCG	20011	1608
query_1	TRUE	0.012392	13014	386	292	0.756477	0.0224374	TF:M08441_1	TF	Factor: AP-2gamma:Elk-1; motif: NGCCKNRGGSGRCGGAAGTG; match class: 1	20011	8589
query_1	TRUE	0.0133614	1879	33	13	0.393939	0.00691857	TF:M03572_1	TF	Factor: DEC1; motif: CNCACRTGASC; match class: 1	20011	1219
query_1	TRUE	0.0136756	6450	385	166	0.431169	0.0257364	TF:M09734_1	TF	Factor: ZNF692; motif: SYNGGSCCCASCCNC; match class: 1	20011	11015
query_1	TRUE	0.0141431	4058	373	112	0.300268	0.0275998	TF:M01588_1	TF	Factor: GKLF; motif: GCCMCRCCCNNN; match class: 1	20011	3163
query_1	TRUE	0.0150272	9326	76	55	0.723684	0.00589749	TF:M12186	TF	Factor: BTEB4; motif: NCCACGCCCM	20011	4560
query_1	TRUE	0.0152564	4496	413	132	0.319613	0.0293594	TF:M10426_1	TF	Factor: ctcf; motif: CCRSCAGGGGGCGCN; match class: 1	20011	1151
query_1	TRUE	0.0156886	12637	263	200	0.760456	0.0158265	TF:M12351	TF	Factor: TIEG1; motif: NCCCNSNCCCCGCCCCC	20011	8782
query_1	TRUE	0.0158295	7899	174	98	0.563218	0.0124066	TF:M10435	TF	Factor: Sp2; motif: GGGGCGGGG	20011	7870
query_1	TRUE	0.0170159	3912	375	109	0.290667	0.027863	TF:M03811_1	TF	Factor: AP-2gamma; motif: GCCYNCRGSN; match class: 1	20011	145
query_1	TRUE	0.0183954	14512	382	314	0.82199	0.0216373	TF:M00986	TF	Factor: Churchill; motif: CGGGNN	20011	834
query_1	TRUE	0.0185334	13918	382	304	0.795812	0.0218422	TF:M03876	TF	Factor: Kaiso; motif: GCMGGGRGCRGS	20011	4524
query_1	TRUE	0.0186729	8209	379	198	0.522427	0.0241199	TF:M07380_1	TF	Factor: E2F-4; motif: NTTTCSCGCC; match class: 1	20011	1517
query_1	TRUE	0.0201715	3023	449	103	0.229399	0.0340721	TF:M07348_1	TF	Factor: AP-2alpha; motif: NSCCNCRGGSN; match class: 1	20011	133
query_1	TRUE	0.0205476	11899	268	194	0.723881	0.0163039	TF:M09826	TF	Factor: BTEB3; motif: CCNNSCCNSCCCCKCCCCC	20011	626
query_1	TRUE	0.0207967	2173	429	77	0.179487	0.0354349	TF:M03896_1	TF	Factor: EGR1; motif: NACGCCCACGCANW; match class: 1	20011	1605
query_1	TRUE	0.0212095	4273	316	101	0.31962	0.0236368	TF:M09862_1	TF	Factor: ZNF614; motif: NCYCWGCCYYNNN; match class: 1	20011	10801
query_1	TRUE	0.0212637	1793	449	69	0.153675	0.038483	TF:M10533	TF	Factor: ZID; motif: NGGNGCTGGAGCCNS	20011	9382
query_1	TRUE	0.0213988	8635	265	150	0.566038	0.0173712	TF:M03807	TF	Factor: SP2; motif: GNNGGGGGCGGGGSN	20011	7880
query_1	TRUE	0.0251113	4449	372	119	0.319892	0.0267476	TF:M01783_1	TF	Factor: SP2; motif: GGGCGGGAC; match class: 1	20011	7859
query_1	TRUE	0.0252325	12977	386	290	0.751295	0.0223472	TF:M07486	TF	Factor: ZNF300; motif: SWGGGGGSN	20011	9900
query_1	TRUE	0.0252476	10243	97	71	0.731959	0.00693156	TF:M12173	TF	Factor: GKLF; motif: NNCCMCRCCCN	20011	4584
query_1	TRUE	0.0254035	2378	415	80	0.192771	0.0336417	TF:M04149	TF	Factor: TFAP2B; motif: NGCCCNNRGGCA	20011	8572
query_1	TRUE	0.0263401	3627	375	102	0.272	0.0281224	TF:M01303_1	TF	Factor: SP1; motif: GGGGYGGGGNS; match class: 1	20011	7825
query_1	TRUE	0.0263836	8711	316	176	0.556962	0.0202043	TF:M10112	TF	Factor: Miz-1; motif: NNRGGWGGGGGAGGGGMRR	20011	5200
query_1	TRUE	0.027443	6819	159	81	0.509434	0.0118786	TF:M12722_1	TF	Factor: ZXDL; motif: GSGSCNNGGGMRGCNCCGGGS; match class: 1	20011	11647
query_1	TRUE	0.0278594	5335	445	160	0.359551	0.0299906	TF:M07387	TF	Factor: LRF; motif: NGKGGGTSNCN	20011	4800
query_1	TRUE	0.0289147	3757	429	117	0.272727	0.0311419	TF:M07354_1	TF	Factor: Egr-1; motif: GCGGGGGCGG; match class: 1	20011	1631
query_1	TRUE	0.0295256	1383	6	5	0.833333	0.00361533	TF:M07429_1	TF	Factor: SMAD3; motif: CAGACAS; match class: 1	20011	7593
query_1	TRUE	0.0298593	3568	261	75	0.287356	0.0210202	TF:M12732_1	TF	Factor: ZNF532; motif: NGGRGCTGGG; match class: 1	20011	10509
query_1	TRUE	0.0301853	3477	415	107	0.257831	0.0307737	TF:M12686	TF	Factor: ZBTB10; motif: TGGGGTGCNS	20011	9078
query_1	TRUE	0.0304373	4675	385	127	0.32987	0.0271658	TF:M00915_1	TF	Factor: AP-2; motif: SNNNCCNCAGGCN; match class: 1	20011	157
query_1	TRUE	0.0304455	8719	262	149	0.568702	0.0170891	TF:M07277	TF	Factor: BTEB2; motif: RGGGNGKGGN	20011	624
query_1	TRUE	0.030785	22	269	5	0.0185874	0.227273	TF:M06732	TF	Factor: ZNF304; motif: GGGGCTTTGCTG	20011	9906
query_1	TRUE	0.0311941	9957	415	250	0.60241	0.025108	TF:M12725	TF	Factor: PHB; motif: NCCCAGCCCCY	20011	6540
query_1	TRUE	0.0328405	5326	373	137	0.367292	0.0257229	TF:M00933_1	TF	Factor: Sp1; motif: CCCCGCCCCN; match class: 1	20011	7847
query_1	TRUE	0.0341296	11135	386	256	0.663212	0.0229906	TF:M07206_1	TF	Factor: E2F-1; motif: NGGGCGGGARV; match class: 1	20011	1439
query_1	TRUE	0.0348113	10417	352	223	0.633523	0.0214073	TF:M09723	TF	Factor: BTEB1; motif: GGGGGCGGGGCNGSGGGNGS	20011	612
query_1	TRUE	0.035609	9389	415	238	0.573494	0.0253488	TF:M12732	TF	Factor: ZNF532; motif: NGGRGCTGGG	20011	10508
query_1	TRUE	0.0362497	9321	412	235	0.570388	0.0252119	TF:M00800	TF	Factor: AP-2; motif: GSCCSCRGGCNRNRNN	20011	150
query_1	TRUE	0.0387055	6093	395	160	0.405063	0.0262596	TF:M00196_1	TF	Factor: Sp1; motif: NGGGGGCGGGGYN; match class: 1	20011	7855
query_1	TRUE	0.0403523	4492	447	139	0.310962	0.0309439	TF:M00807	TF	Factor: Egr; motif: GTGGGSGCRRS	20011	1672
query_1	TRUE	0.040586	10102	373	229	0.613941	0.0226688	TF:M01865	TF	Factor: BTEB3; motif: BNRNGGGAGGNGT	20011	636
query_1	TRUE	0.0406204	1441	400	53	0.1325	0.03678	TF:M11474	TF	Factor: Tcfap2e; motif: TGCCCYNRGGCN	20011	8616
query_1	TRUE	0.0416865	8724	265	150	0.566038	0.0171939	TF:M10071	TF	Factor: Sp1; motif: NGGGGGCGGGGCCNGGGGGGGG	20011	7836
query_1	TRUE	0.0417032	4243	385	117	0.303896	0.0275748	TF:M12648	TF	Factor: PATZ1; motif: SCNCCNCNSCCCCCASCCN	20011	6320
query_1	TRUE	0.04174	5954	352	142	0.403409	0.0238495	TF:M07597	TF	Factor: Egr-1; motif: GCGTGGGCGT	20011	1616
query_1	TRUE	0.0417893	7897	392	196	0.5	0.0248196	TF:M08952	TF	Factor: NF-KAPPAB1; motif: NGGKRNTTYCCCN	20011	5708
query_1	TRUE	0.0437789	1428	374	50	0.13369	0.035014	TF:M04149_1	TF	Factor: TFAP2B; motif: NGCCCNNRGGCA; match class: 1	20011	8573
query_1	TRUE	0.0450903	8506	350	188	0.537143	0.022102	TF:M03893	TF	Factor: WT1; motif: GNGGGGGCGGGG	20011	8988
query_1	TRUE	0.0452733	2140	452	78	0.172566	0.0364486	TF:M07249_1	TF	Factor: ctcf; motif: CCNCNAGRKGGCRSTN; match class: 1	20011	1155
query_1	TRUE	0.0455566	5813	390	152	0.389744	0.0261483	TF:M01104_1	TF	Factor: MOVO-B; motif: GNGGGGG; match class: 1	20011	5239
query_1	TRUE	0.0455946	7005	393	178	0.452926	0.0254104	TF:M01118	TF	Factor: WT1; motif: SMCNCCNSC	20011	8984
query_1	TRUE	0.0493134	4121	262	83	0.316794	0.0201407	TF:M09967	TF	Factor: AP-2rep; motif: NGGGGCGGGGC	20011	148
query_1	TRUE	0.0494903	12713	370	273	0.737838	0.0214741	TF:M00333_1	TF	Factor: ZF5; motif: NRNGNGCGCGCWN; match class: 1	20011	9235

## Sheet: GO_LB vs iSB_UP DEGs
query	significant	p_value	term_size	query_size	intersection_size	precision	recall	term_id	source	term_name	effective_domain_size	source_order
query_1	TRUE	1.1072e-17	3021	483	149	0.308489	0.0493214	GO:0051239	GO:BP	regulation of multicellular organismal process	21110	14358
query_1	TRUE	3.13008e-17	2809	428	130	0.303738	0.0462798	GO:0010033	GO:BP	response to organic substance	21110	3923
query_1	TRUE	3.52022e-15	2482	488	127	0.260246	0.0511684	GO:0050793	GO:BP	regulation of developmental process	21110	14007
query_1	TRUE	3.52355e-14	4753	473	188	0.397463	0.039554	GO:0048523	GO:BP	negative regulation of cellular process	21110	13544
query_1	TRUE	2.94181e-13	1994	472	104	0.220339	0.0521565	GO:0008283	GO:BP	cell population proliferation	21110	3223
query_1	TRUE	3.24201e-13	6441	337	175	0.519288	0.0271697	GO:1901564	GO:BP	organonitrogen compound metabolic process	21110	22563
query_1	TRUE	5.33154e-13	1720	440	90	0.204545	0.0523256	GO:0009719	GO:BP	response to endogenous stimulus	21110	3694
query_1	TRUE	5.55679e-13	1407	488	85	0.17418	0.0604122	GO:2000026	GO:BP	regulation of multicellular organismal development	21110	26633
query_1	TRUE	6.80773e-13	5896	472	214	0.45339	0.0362958	GO:0048856	GO:BP	anatomical structure development	21110	13840
query_1	TRUE	1.17939e-12	3423	483	149	0.308489	0.0435291	GO:0010646	GO:BP	regulation of cell communication	21110	4388
query_1	TRUE	1.37351e-12	6489	472	228	0.483051	0.0351364	GO:0032502	GO:BP	developmental process	21110	8032
query_1	TRUE	2.61411e-12	3413	427	135	0.316159	0.0395546	GO:0023051	GO:BP	regulation of signaling	21110	7001
query_1	TRUE	3.40587e-12	2129	427	99	0.23185	0.0465007	GO:0008219	GO:BP	cell death	21110	3218
query_1	TRUE	4.07216e-12	2722	428	116	0.271028	0.0426157	GO:0070887	GO:BP	cellular response to chemical stimulus	21110	17294
query_1	TRUE	4.96065e-12	1648	427	84	0.196721	0.0509709	GO:0010941	GO:BP	regulation of cell death	21110	4635
query_1	TRUE	5.42782e-12	4017	424	149	0.351415	0.0370924	GO:0006950	GO:BP	response to stress	21110	2640
query_1	TRUE	1.23297e-11	4658	472	178	0.377119	0.0382138	GO:0007275	GO:BP	multicellular organism development	21110	2871
query_1	TRUE	2.00423e-11	7521	464	246	0.530172	0.0327084	GO:0051716	GO:BP	cellular response to stimulus	21110	14697
query_1	TRUE	2.19961e-11	2669	424	112	0.264151	0.0419633	GO:0035556	GO:BP	intracellular signal transduction	21110	9589
query_1	TRUE	2.41652e-11	4124	428	151	0.352804	0.0366149	GO:0042221	GO:BP	response to chemical	21110	10621
query_1	TRUE	3.7562e-11	1905	427	90	0.210773	0.0472441	GO:0006915	GO:BP	apoptotic process	21110	2620
query_1	TRUE	4.72008e-11	1491	427	77	0.180328	0.0516432	GO:0043067	GO:BP	regulation of programmed cell death	21110	11095
query_1	TRUE	7.4753e-11	1961	427	91	0.213115	0.0464049	GO:0012501	GO:BP	programmed cell death	21110	4688
query_1	TRUE	7.76774e-11	1310	488	77	0.157787	0.0587786	GO:0051094	GO:BP	positive regulation of developmental process	21110	14249
query_1	TRUE	1.02516e-10	3003	427	120	0.28103	0.03996	GO:0009966	GO:BP	regulation of signal transduction	21110	3882
query_1	TRUE	1.11975e-10	1469	440	77	0.175	0.0524166	GO:0071495	GO:BP	cellular response to endogenous stimulus	21110	17675
query_1	TRUE	1.38037e-10	6604	427	207	0.484778	0.0313446	GO:0007154	GO:BP	cell communication	21110	2781
query_1	TRUE	1.39777e-10	1459	427	75	0.175644	0.0514051	GO:0042981	GO:BP	regulation of apoptotic process	21110	11046
query_1	TRUE	1.71845e-10	6493	411	198	0.481752	0.0304944	GO:0023052	GO:BP	signaling	21110	7002
query_1	TRUE	2.54358e-10	1949	424	89	0.209906	0.0456644	GO:0033554	GO:BP	cellular response to stress	21110	8724
query_1	TRUE	2.57053e-10	1682	488	89	0.182377	0.0529132	GO:0042127	GO:BP	regulation of cell population proliferation	21110	10550
query_1	TRUE	2.64089e-10	9081	464	278	0.599138	0.0306134	GO:0050896	GO:BP	response to stimulus	21110	14092
query_1	TRUE	2.77036e-10	4013	427	145	0.339578	0.0361326	GO:0048583	GO:BP	regulation of response to stimulus	21110	13594
query_1	TRUE	4.74563e-10	2019	428	91	0.212617	0.0450718	GO:0071310	GO:BP	cellular response to organic substance	21110	17511
query_1	TRUE	5.11722e-10	4318	483	167	0.345756	0.0386753	GO:0030154	GO:BP	cell differentiation	21110	7050
query_1	TRUE	5.64862e-10	5932	475	207	0.435789	0.0348955	GO:0048519	GO:BP	negative regulation of biological process	21110	13540
query_1	TRUE	7.6155e-10	3987	470	154	0.32766	0.0386255	GO:0048731	GO:BP	system development	21110	13728
query_1	TRUE	8.73595e-10	4344	483	167	0.345756	0.0384438	GO:0048869	GO:BP	cellular developmental process	21110	13852
query_1	TRUE	1.56986e-09	11108	395	277	0.701266	0.024937	GO:0050794	GO:BP	regulation of cellular process	21110	14008
query_1	TRUE	1.60411e-09	3128	388	112	0.28866	0.0358056	GO:0048513	GO:BP	animal organ development	21110	13536
query_1	TRUE	1.71175e-09	5615	468	195	0.416667	0.0347284	GO:0048522	GO:BP	positive regulation of cellular process	21110	13543
query_1	TRUE	1.87862e-09	1505	507	83	0.163708	0.0551495	GO:0016477	GO:BP	cell migration	21110	5356
query_1	TRUE	1.98384e-09	1146	488	68	0.139344	0.0593368	GO:0009628	GO:BP	response to abiotic stimulus	21110	3626
query_1	TRUE	2.24831e-09	2008	393	84	0.21374	0.0418327	GO:0009888	GO:BP	tissue development	21110	3826
query_1	TRUE	3.52553e-09	2712	410	105	0.256098	0.0387168	GO:0009653	GO:BP	anatomical structure morphogenesis	21110	3648
query_1	TRUE	4.03196e-09	5449	337	146	0.433234	0.0267939	GO:0019538	GO:BP	protein metabolic process	21110	6189
query_1	TRUE	4.75931e-09	7716	397	213	0.536524	0.027605	GO:0032501	GO:BP	multicellular organismal process	21110	8031
query_1	TRUE	5.6464e-09	2496	488	112	0.229508	0.0448718	GO:0051246	GO:BP	regulation of protein metabolic process	21110	14362
query_1	TRUE	7.76499e-09	3535	428	129	0.301402	0.0364922	GO:0010604	GO:BP	positive regulation of macromolecule metabolic process	21110	4347
query_1	TRUE	9.48736e-09	1704	488	86	0.17623	0.0504695	GO:0051240	GO:BP	positive regulation of multicellular organismal process	21110	14359
query_1	TRUE	1.29964e-08	576	343	36	0.104956	0.0625	GO:0009611	GO:BP	response to wounding	21110	3616
query_1	TRUE	1.46144e-08	6034	411	182	0.442822	0.0301624	GO:0007165	GO:BP	signal transduction	21110	2792
query_1	TRUE	1.80967e-08	944	430	54	0.125581	0.0572034	GO:0030097	GO:BP	hemopoiesis	21110	7038
query_1	TRUE	1.81578e-08	6358	468	210	0.448718	0.0330293	GO:0048518	GO:BP	positive regulation of biological process	21110	13539
query_1	TRUE	2.07192e-08	2890	449	115	0.256125	0.0397924	GO:0007166	GO:BP	cell surface receptor signaling pathway	21110	2793
query_1	TRUE	2.12742e-08	1568	483	80	0.165631	0.0510204	GO:0045595	GO:BP	regulation of cell differentiation	21110	12146
query_1	TRUE	2.21e-08	5662	428	179	0.418224	0.0316143	GO:0051171	GO:BP	regulation of nitrogen compound metabolic process	21110	14316
query_1	TRUE	2.21056e-08	737	502	51	0.101594	0.0691995	GO:0001944	GO:BP	vasculature development	21110	570
query_1	TRUE	2.28423e-08	803	507	54	0.106509	0.0672478	GO:0006954	GO:BP	inflammatory response	21110	2643
query_1	TRUE	2.60929e-08	1082	426	58	0.13615	0.0536044	GO:0035295	GO:BP	tube development	21110	9435
query_1	TRUE	3.394e-08	1123	459	62	0.135076	0.0552093	GO:0072359	GO:BP	circulatory system development	21110	18343
query_1	TRUE	4.9786e-08	12891	395	303	0.767089	0.0235048	GO:0065007	GO:BP	biological regulation	21110	16811
query_1	TRUE	5.2459e-08	706	502	49	0.0976096	0.0694051	GO:0001568	GO:BP	blood vessel development	21110	367
query_1	TRUE	5.6177e-08	1728	424	77	0.181604	0.0445602	GO:1902531	GO:BP	regulation of intracellular signal transduction	21110	23381
query_1	TRUE	6.19428e-08	1616	377	68	0.180371	0.0420792	GO:0048585	GO:BP	negative regulation of response to stimulus	21110	13596
query_1	TRUE	6.61896e-08	680	472	46	0.0974576	0.0676471	GO:0071363	GO:BP	cellular response to growth factor stimulus	21110	17561
query_1	TRUE	7.18499e-08	3848	428	134	0.313084	0.0348233	GO:0009893	GO:BP	positive regulation of metabolic process	21110	3831
query_1	TRUE	7.6984e-08	2763	472	114	0.241525	0.0412595	GO:0048468	GO:BP	cell development	21110	13507
query_1	TRUE	8.33112e-08	710	472	47	0.0995763	0.0661972	GO:0070848	GO:BP	response to growth factor	21110	17276
query_1	TRUE	8.91436e-08	1796	428	79	0.184579	0.0439866	GO:1901700	GO:BP	response to oxygen-containing compound	21110	22661
query_1	TRUE	9.23684e-08	849	483	53	0.109731	0.0624264	GO:0045597	GO:BP	positive regulation of cell differentiation	21110	12148
query_1	TRUE	1.05255e-07	2964	372	100	0.268817	0.0337382	GO:0065008	GO:BP	regulation of biological quality	21110	16812
query_1	TRUE	1.07309e-07	990	157	30	0.191083	0.030303	GO:0007167	GO:BP	enzyme-linked receptor protein signaling pathway	21110	2794
query_1	TRUE	1.70038e-07	5836	428	180	0.420561	0.030843	GO:0080090	GO:BP	regulation of primary metabolic process	21110	18790
query_1	TRUE	1.88854e-07	1705	507	85	0.167653	0.0498534	GO:0048870	GO:BP	cell motility	21110	13853
query_1	TRUE	2.61949e-07	39	133	8	0.0601504	0.205128	GO:0071634	GO:BP	regulation of transforming growth factor beta production	21110	17761
query_1	TRUE	3.41387e-07	1060	488	60	0.122951	0.0566038	GO:0010243	GO:BP	response to organonitrogen compound	21110	4100
query_1	TRUE	4.08333e-07	875	488	53	0.108607	0.0605714	GO:0009725	GO:BP	response to hormone	21110	3700
query_1	TRUE	4.94645e-07	42	133	8	0.0601504	0.190476	GO:0071604	GO:BP	transforming growth factor beta production	21110	17740
query_1	TRUE	5.92233e-07	1840	161	41	0.254658	0.0222826	GO:0050790	GO:BP	regulation of catalytic activity	21110	14005
query_1	TRUE	6.22323e-07	2586	507	112	0.220907	0.0433101	GO:0065009	GO:BP	regulation of molecular function	21110	16813
query_1	TRUE	6.35287e-07	1174	426	58	0.13615	0.0494037	GO:0048646	GO:BP	anatomical structure formation involved in morphogenesis	21110	13644
query_1	TRUE	6.46339e-07	867	426	48	0.112676	0.0553633	GO:0035239	GO:BP	tube morphogenesis	21110	9403
query_1	TRUE	7.06098e-07	1136	488	62	0.127049	0.0545775	GO:1901698	GO:BP	response to nitrogen compound	21110	22659
query_1	TRUE	7.14931e-07	1438	306	53	0.173203	0.0368567	GO:0080134	GO:BP	regulation of response to stress	21110	18808
query_1	TRUE	9.11808e-07	745	483	47	0.0973085	0.0630872	GO:0001816	GO:BP	cytokine production	21110	487
query_1	TRUE	9.62544e-07	12480	395	292	0.739241	0.0233974	GO:0050789	GO:BP	regulation of biological process	21110	14004
query_1	TRUE	1.30156e-06	3131	428	112	0.261682	0.0357713	GO:0051173	GO:BP	positive regulation of nitrogen compound metabolic process	21110	14318
query_1	TRUE	1.64461e-06	1157	466	60	0.128755	0.0518583	GO:0001775	GO:BP	cell activation	21110	454
query_1	TRUE	1.65658e-06	140	381	17	0.0446194	0.121429	GO:0071456	GO:BP	cellular response to hypoxia	21110	17637
query_1	TRUE	1.79152e-06	415	409	30	0.0733496	0.0722892	GO:0001503	GO:BP	ossification	21110	333
query_1	TRUE	2.16349e-06	610	426	38	0.0892019	0.0622951	GO:0002521	GO:BP	leukocyte differentiation	21110	1061
query_1	TRUE	2.1853e-06	739	483	46	0.0952381	0.0622463	GO:0001817	GO:BP	regulation of cytokine production	21110	488
query_1	TRUE	2.52155e-06	2374	439	93	0.211845	0.0391744	GO:0051172	GO:BP	negative regulation of nitrogen compound metabolic process	21110	14317
query_1	TRUE	2.63e-06	443	343	28	0.0816327	0.0632054	GO:0042060	GO:BP	wound healing	21110	10514
query_1	TRUE	3.0453e-06	619	502	42	0.0836653	0.0678514	GO:0048514	GO:BP	blood vessel morphogenesis	21110	13537
query_1	TRUE	3.32075e-06	1165	483	61	0.126294	0.0523605	GO:0010628	GO:BP	positive regulation of gene expression	21110	4370
query_1	TRUE	3.95545e-06	148	381	17	0.0446194	0.114865	GO:0036294	GO:BP	cellular response to decreased oxygen levels	21110	10068
query_1	TRUE	4.25227e-06	248	507	25	0.0493097	0.100806	GO:0071216	GO:BP	cellular response to biotic stimulus	21110	17421
query_1	TRUE	4.27517e-06	835	483	49	0.101449	0.0586826	GO:0060284	GO:BP	regulation of cell development	21110	15333
query_1	TRUE	4.46642e-06	927	507	54	0.106509	0.0582524	GO:0030334	GO:BP	regulation of cell migration	21110	7143
query_1	TRUE	5.0455e-06	7345	183	103	0.562842	0.0140231	GO:0019222	GO:BP	regulation of metabolic process	21110	5900
query_1	TRUE	5.5639e-06	1359	483	67	0.138716	0.049301	GO:0010648	GO:BP	negative regulation of cell communication	21110	4390
query_1	TRUE	5.5639e-06	1359	483	67	0.138716	0.049301	GO:0023057	GO:BP	negative regulation of signaling	21110	7004
query_1	TRUE	6.56236e-06	2900	445	107	0.240449	0.0368966	GO:0009605	GO:BP	response to external stimulus	21110	3610
query_1	TRUE	6.61706e-06	1742	507	82	0.161736	0.0470723	GO:0023056	GO:BP	positive regulation of signaling	21110	7003
query_1	TRUE	6.9772e-06	1744	507	82	0.161736	0.0470183	GO:0010647	GO:BP	positive regulation of cell communication	21110	4389
query_1	TRUE	7.85113e-06	1538	507	75	0.147929	0.0487646	GO:0009967	GO:BP	positive regulation of signal transduction	21110	3883
query_1	TRUE	9.02605e-06	919	507	53	0.104536	0.0576714	GO:0034097	GO:BP	response to cytokine	21110	8849
query_1	TRUE	1.04069e-05	1110	411	52	0.126521	0.0468468	GO:0051241	GO:BP	negative regulation of multicellular organismal process	21110	14360
query_1	TRUE	1.24765e-05	599	327	31	0.0948012	0.0517529	GO:0097190	GO:BP	apoptotic signaling pathway	21110	19569
query_1	TRUE	1.29752e-05	1012	466	53	0.113734	0.0523715	GO:0045321	GO:BP	leukocyte activation	21110	12051
query_1	TRUE	1.54839e-05	988	507	55	0.108481	0.055668	GO:2000145	GO:BP	regulation of cell motility	21110	26747
query_1	TRUE	1.91481e-05	1005	488	54	0.110656	0.0537313	GO:0060548	GO:BP	negative regulation of cell death	21110	15578
query_1	TRUE	1.91887e-05	164	381	17	0.0446194	0.103659	GO:0071453	GO:BP	cellular response to oxygen levels	21110	17634
query_1	TRUE	2.0209e-05	1252	483	62	0.128364	0.0495208	GO:0009968	GO:BP	negative regulation of signal transduction	21110	3884
query_1	TRUE	2.17411e-05	916	507	52	0.102564	0.0567686	GO:0033993	GO:BP	response to lipid	21110	8812
query_1	TRUE	2.21386e-05	664	426	38	0.0892019	0.0572289	GO:0061061	GO:BP	muscle structure development	21110	16048
query_1	TRUE	2.27443e-05	1287	428	58	0.135514	0.045066	GO:1901701	GO:BP	cellular response to oxygen-containing compound	21110	22662
query_1	TRUE	2.42155e-05	2976	428	104	0.242991	0.0349462	GO:0031325	GO:BP	positive regulation of cellular metabolic process	21110	7512
query_1	TRUE	2.82366e-05	1033	507	56	0.110454	0.054211	GO:0040012	GO:BP	regulation of locomotion	21110	10465
query_1	TRUE	2.97728e-05	5493	428	164	0.383178	0.0298562	GO:0031323	GO:BP	regulation of cellular metabolic process	21110	7510
query_1	TRUE	3.31511e-05	286	381	22	0.0577428	0.0769231	GO:0001666	GO:BP	response to hypoxia	21110	391
query_1	TRUE	3.62623e-05	550	393	32	0.0814249	0.0581818	GO:0001501	GO:BP	skeletal system development	21110	331
query_1	TRUE	4.75345e-05	1365	507	67	0.13215	0.0490842	GO:0040011	GO:BP	locomotion	21110	10464
query_1	TRUE	5.37119e-05	369	67	11	0.164179	0.0298103	GO:2001233	GO:BP	regulation of apoptotic signaling pathway	21110	27712
query_1	TRUE	5.66685e-05	602	507	39	0.0769231	0.0647841	GO:0071396	GO:BP	cellular response to lipid	21110	17594
query_1	TRUE	5.85532e-05	412	507	31	0.061144	0.0752427	GO:1903706	GO:BP	regulation of hemopoiesis	21110	24346
query_1	TRUE	6.29939e-05	955	488	51	0.104508	0.0534031	GO:0008284	GO:BP	positive regulation of cell population proliferation	21110	3224
query_1	TRUE	7.09349e-05	935	428	46	0.107477	0.0491979	GO:0014070	GO:BP	response to organic cyclic compound	21110	4755
query_1	TRUE	7.38563e-05	299	381	22	0.0577428	0.0735786	GO:0036293	GO:BP	response to decreased oxygen levels	21110	10067
query_1	TRUE	7.88658e-05	905	488	49	0.10041	0.0541436	GO:0043069	GO:BP	negative regulation of programmed cell death	21110	11097
query_1	TRUE	8.15698e-05	301	483	25	0.0517598	0.0830565	GO:0097193	GO:BP	intrinsic apoptotic signaling pathway	21110	19572
query_1	TRUE	8.2167e-05	2547	470	98	0.208511	0.0384766	GO:0007399	GO:BP	nervous system development	21110	2969
query_1	TRUE	9.44554e-05	1705	468	73	0.155983	0.0428152	GO:0022008	GO:BP	neurogenesis	21110	6923
query_1	TRUE	0.0001009	884	488	48	0.0983607	0.0542986	GO:0043066	GO:BP	negative regulation of apoptotic process	21110	11094
query_1	TRUE	0.000108677	228	385	19	0.0493506	0.0833333	GO:0001649	GO:BP	osteoblast differentiation	21110	381
query_1	TRUE	0.000109151	6	157	4	0.0254777	0.666667	GO:1902949	GO:BP	positive regulation of tau-protein kinase activity	21110	23699
query_1	TRUE	0.000110455	826	507	47	0.0927022	0.0569007	GO:0071345	GO:BP	cellular response to cytokine stimulus	21110	17543
query_1	TRUE	0.000120263	2194	439	83	0.189066	0.0378304	GO:0031324	GO:BP	negative regulation of cellular metabolic process	21110	7511
query_1	TRUE	0.000122626	6816	428	191	0.446262	0.0280223	GO:0060255	GO:BP	regulation of macromolecule metabolic process	21110	15305
query_1	TRUE	0.000128321	480	426	30	0.0704225	0.0625	GO:1903131	GO:BP	mononuclear cell differentiation	21110	23860
query_1	TRUE	0.000130649	1522	507	71	0.140039	0.0466491	GO:0044093	GO:BP	positive regulation of molecular function	21110	11549
query_1	TRUE	0.000154394	1004	318	39	0.122642	0.0388446	GO:0051248	GO:BP	negative regulation of protein metabolic process	21110	14364
query_1	TRUE	0.000155107	1257	428	55	0.128505	0.043755	GO:0045944	GO:BP	positive regulation of transcription by RNA polymerase II	21110	12439
query_1	TRUE	0.000166881	1451	483	66	0.136646	0.0454859	GO:0051247	GO:BP	positive regulation of protein metabolic process	21110	14363
query_1	TRUE	0.000187356	481	507	33	0.0650888	0.0686071	GO:0001819	GO:BP	positive regulation of cytokine production	21110	490
query_1	TRUE	0.000199601	1942	428	74	0.172897	0.038105	GO:0010557	GO:BP	positive regulation of macromolecule biosynthetic process	21110	4305
query_1	TRUE	0.000207974	138	472	16	0.0338983	0.115942	GO:0006986	GO:BP	response to unfolded protein	21110	2666
query_1	TRUE	0.000220926	632	147	19	0.129252	0.0300633	GO:0007169	GO:BP	transmembrane receptor protein tyrosine kinase signaling pathway	21110	2796
query_1	TRUE	0.000252288	1144	439	52	0.118451	0.0454545	GO:0009790	GO:BP	embryo development	21110	3755
query_1	TRUE	0.000313746	342	488	26	0.0532787	0.0760234	GO:0048545	GO:BP	response to steroid hormone	21110	13564
query_1	TRUE	0.000335699	997	507	52	0.102564	0.0521565	GO:1902533	GO:BP	positive regulation of intracellular signal transduction	21110	23383
query_1	TRUE	0.000338627	1857	428	71	0.165888	0.0382337	GO:0051254	GO:BP	positive regulation of RNA metabolic process	21110	14370
query_1	TRUE	0.000346059	2081	428	77	0.179907	0.0370014	GO:0009891	GO:BP	positive regulation of biosynthetic process	21110	3829
query_1	TRUE	0.000349186	9	124	4	0.0322581	0.444444	GO:1901388	GO:BP	regulation of transforming growth factor beta activation	21110	22410
query_1	TRUE	0.000350221	1673	411	64	0.155718	0.0382546	GO:0042592	GO:BP	homeostatic process	21110	10828
query_1	TRUE	0.000352053	302	483	24	0.0496894	0.0794702	GO:0030522	GO:BP	intracellular receptor signaling pathway	21110	7201
query_1	TRUE	0.000357919	327	381	22	0.0577428	0.0672783	GO:0070482	GO:BP	response to oxygen levels	21110	17073
query_1	TRUE	0.000394825	205	419	18	0.0429594	0.0878049	GO:0033002	GO:BP	muscle cell proliferation	21110	8400
query_1	TRUE	0.000411386	4177	428	129	0.301402	0.0308834	GO:0009889	GO:BP	regulation of biosynthetic process	21110	3827
query_1	TRUE	0.000482549	2023	428	75	0.175234	0.0370737	GO:0031328	GO:BP	positive regulation of cellular biosynthetic process	21110	7515
query_1	TRUE	0.00049463	880	408	41	0.10049	0.0465909	GO:0022603	GO:BP	regulation of anatomical structure morphogenesis	21110	6973
query_1	TRUE	0.000531419	477	483	31	0.0641822	0.0649895	GO:0045785	GO:BP	positive regulation of cell adhesion	21110	12317
query_1	TRUE	0.000567364	3559	439	116	0.264237	0.0325934	GO:0009892	GO:BP	negative regulation of metabolic process	21110	3830
query_1	TRUE	0.000575955	192	274	14	0.0510949	0.0729167	GO:0042770	GO:BP	signal transduction in response to DNA damage	21110	10932
query_1	TRUE	0.000622168	1504	483	66	0.136646	0.043883	GO:0002682	GO:BP	regulation of immune system process	21110	1218
query_1	TRUE	0.000658871	3958	428	123	0.287383	0.0310763	GO:0010556	GO:BP	regulation of macromolecule biosynthetic process	21110	4304
query_1	TRUE	0.000680729	1488	145	29	0.2	0.0194892	GO:0048699	GO:BP	generation of neurons	21110	13696
query_1	TRUE	0.000686821	2710	426	92	0.215962	0.0339483	GO:0002376	GO:BP	immune system process	21110	924
query_1	TRUE	0.000792545	590	419	32	0.0763723	0.0542373	GO:0010942	GO:BP	positive regulation of cell death	21110	4636
query_1	TRUE	0.000813433	2050	428	75	0.175234	0.0365854	GO:0045935	GO:BP	positive regulation of nucleobase-containing compound metabolic process	21110	12431
query_1	TRUE	0.000820517	969	507	50	0.0986193	0.0515996	GO:0051336	GO:BP	regulation of hydrolase activity	21110	14432
query_1	TRUE	0.000821279	507	392	28	0.0714286	0.0552268	GO:1901652	GO:BP	response to peptide	21110	22626
query_1	TRUE	0.000848996	419	419	26	0.0620525	0.0620525	GO:0030099	GO:BP	myeloid cell differentiation	21110	7040
query_1	TRUE	0.000859084	317	483	24	0.0496894	0.0757098	GO:0022409	GO:BP	positive regulation of cell-cell adhesion	21110	6962
query_1	TRUE	0.000865627	927	367	39	0.106267	0.0420712	GO:0051093	GO:BP	negative regulation of developmental process	21110	14248
query_1	TRUE	0.000920093	338	488	25	0.0512295	0.0739645	GO:0062197	GO:BP	cellular response to chemical stress	21110	16782
query_1	TRUE	0.000965344	643	294	27	0.0918367	0.0419907	GO:0031329	GO:BP	regulation of cellular catabolic process	21110	7516
query_1	TRUE	0.000991758	473	424	28	0.0660377	0.0591966	GO:0034248	GO:BP	regulation of amide metabolic process	21110	8971
query_1	TRUE	0.00106114	221	507	20	0.0394477	0.0904977	GO:0071219	GO:BP	cellular response to molecule of bacterial origin	21110	17424
query_1	TRUE	0.00106795	979	233	30	0.128755	0.0306435	GO:0006082	GO:BP	organic acid metabolic process	21110	1991
query_1	TRUE	0.00107365	2283	423	80	0.189125	0.0350416	GO:0048584	GO:BP	positive regulation of response to stimulus	21110	13595
query_1	TRUE	0.0010745	2601	319	71	0.222571	0.0272972	GO:0009056	GO:BP	catabolic process	21110	3308
query_1	TRUE	0.00109326	370	419	24	0.0572792	0.0648649	GO:0070997	GO:BP	neuron death	21110	17362
query_1	TRUE	0.00110802	237	388	18	0.0463918	0.0759494	GO:0060348	GO:BP	bone development	21110	15392
query_1	TRUE	0.00114607	352	507	26	0.0512821	0.0738636	GO:0002237	GO:BP	response to molecule of bacterial origin	21110	788
query_1	TRUE	0.00115928	1216	274	38	0.138686	0.03125	GO:0018193	GO:BP	peptidyl-amino acid modification	21110	5557
query_1	TRUE	0.00131347	37	419	8	0.0190931	0.216216	GO:0043618	GO:BP	regulation of transcription from RNA polymerase II promoter in response to stress	21110	11404
query_1	TRUE	0.00132547	410	410	25	0.0609756	0.0609756	GO:0060537	GO:BP	muscle tissue development	21110	15567
query_1	TRUE	0.00133596	628	233	23	0.0987124	0.0366242	GO:0032787	GO:BP	monocarboxylic acid metabolic process	21110	8249
query_1	TRUE	0.00135318	12	124	4	0.0322581	0.333333	GO:0036363	GO:BP	transforming growth factor beta activation	21110	10112
query_1	TRUE	0.00141741	100	411	12	0.0291971	0.12	GO:0060840	GO:BP	artery development	21110	15851
query_1	TRUE	0.00145874	160	411	15	0.0364964	0.09375	GO:0035966	GO:BP	response to topologically incorrect protein	21110	9877
query_1	TRUE	0.00157302	547	466	32	0.0686695	0.0585009	GO:0042110	GO:BP	T cell activation	21110	10539
query_1	TRUE	0.00157898	4064	428	124	0.28972	0.0305118	GO:0031326	GO:BP	regulation of cellular biosynthetic process	21110	7513
query_1	TRUE	0.00165632	1231	387	48	0.124031	0.0389927	GO:0060429	GO:BP	epithelium development	21110	15465
query_1	TRUE	0.00170381	231	67	8	0.119403	0.034632	GO:2001234	GO:BP	negative regulation of apoptotic signaling pathway	21110	27713
query_1	TRUE	0.00177039	522	419	29	0.0692124	0.0555556	GO:0043068	GO:BP	positive regulation of programmed cell death	21110	11096
query_1	TRUE	0.00178691	99	507	13	0.025641	0.131313	GO:1990869	GO:BP	cellular response to chemokine	21110	26568
query_1	TRUE	0.00178691	99	507	13	0.025641	0.131313	GO:1990868	GO:BP	response to chemokine	21110	26567
query_1	TRUE	0.00180005	142	192	10	0.0520833	0.0704225	GO:0048660	GO:BP	regulation of smooth muscle cell proliferation	21110	13658
query_1	TRUE	0.00186905	532	507	33	0.0650888	0.0620301	GO:0030335	GO:BP	positive regulation of cell migration	21110	7144
query_1	TRUE	0.00187443	133	507	15	0.0295858	0.112782	GO:0070555	GO:BP	response to interleukin-1	21110	17109
query_1	TRUE	0.00199602	151	11	4	0.363636	0.0264901	GO:0010821	GO:BP	regulation of mitochondrion organization	21110	4537
query_1	TRUE	0.00200501	709	419	35	0.0835322	0.0493653	GO:0008285	GO:BP	negative regulation of cell population proliferation	21110	3225
query_1	TRUE	0.00204426	317	507	24	0.0473373	0.0757098	GO:1902105	GO:BP	regulation of leukocyte differentiation	21110	23039
query_1	TRUE	0.00209629	5969	428	167	0.390187	0.0279779	GO:0009058	GO:BP	biosynthetic process	21110	3310
query_1	TRUE	0.00219048	13	318	5	0.0157233	0.384615	GO:0060213	GO:BP	positive regulation of nuclear-transcribed mRNA poly(A) tail shortening	21110	15270
query_1	TRUE	0.00232409	146	192	10	0.0520833	0.0684932	GO:0048659	GO:BP	smooth muscle cell proliferation	21110	13657
query_1	TRUE	0.00232417	461	454	28	0.061674	0.0607375	GO:0051960	GO:BP	regulation of nervous system development	21110	14818
query_1	TRUE	0.00233255	11	157	4	0.0254777	0.363636	GO:1902947	GO:BP	regulation of tau-protein kinase activity	21110	23697
query_1	TRUE	0.0023879	212	507	19	0.0374753	0.0896226	GO:0071222	GO:BP	cellular response to lipopolysaccharide	21110	17427
query_1	TRUE	0.00240943	2157	325	62	0.190769	0.0287436	GO:1901575	GO:BP	organic substance catabolic process	21110	22570
query_1	TRUE	0.00241989	87	185	8	0.0432432	0.091954	GO:0014812	GO:BP	muscle cell migration	21110	4812
query_1	TRUE	0.00248612	5894	428	165	0.385514	0.0279946	GO:1901576	GO:BP	organic substance biosynthetic process	21110	22571
query_1	TRUE	0.00266594	3342	439	108	0.246014	0.032316	GO:0010605	GO:BP	negative regulation of macromolecule metabolic process	21110	4348
query_1	TRUE	0.00272902	1068	507	52	0.102564	0.0486891	GO:0002684	GO:BP	positive regulation of immune system process	21110	1220
query_1	TRUE	0.00277197	1001	316	36	0.113924	0.035964	GO:0044092	GO:BP	negative regulation of molecular function	21110	11548
query_1	TRUE	0.00281504	3617	483	124	0.256729	0.0342826	GO:0036211	GO:BP	protein modification process	21110	10015
query_1	TRUE	0.00281964	569	483	33	0.068323	0.0579965	GO:0005975	GO:BP	carbohydrate metabolic process	21110	1887
query_1	TRUE	0.002842	269	483	21	0.0434783	0.0780669	GO:1903039	GO:BP	positive regulation of leukocyte cell-cell adhesion	21110	23786
query_1	TRUE	0.00285054	1415	145	27	0.186207	0.0190813	GO:0030182	GO:BP	neuron differentiation	21110	7062
query_1	TRUE	0.00296392	973	233	29	0.124464	0.0298047	GO:0043436	GO:BP	oxoacid metabolic process	21110	11283
query_1	TRUE	0.0029731	1530	426	59	0.138498	0.0385621	GO:0007155	GO:BP	cell adhesion	21110	2782
query_1	TRUE	0.00300375	1003	483	48	0.0993789	0.0478564	GO:0009894	GO:BP	regulation of catabolic process	21110	3832
query_1	TRUE	0.0030066	700	304	28	0.0921053	0.04	GO:0080135	GO:BP	regulation of cellular response to stress	21110	18809
query_1	TRUE	0.00304817	260	419	19	0.0453461	0.0730769	GO:0071560	GO:BP	cellular response to transforming growth factor beta stimulus	21110	17710
query_1	TRUE	0.00310304	507	419	28	0.0668258	0.0552268	GO:0043065	GO:BP	positive regulation of apoptotic process	21110	11093
query_1	TRUE	0.00313888	506	372	26	0.0698925	0.0513834	GO:0007264	GO:BP	small GTPase mediated signal transduction	21110	2861
query_1	TRUE	0.00321569	937	297	33	0.111111	0.0352188	GO:0040007	GO:BP	growth	21110	10460
query_1	TRUE	0.0033573	281	157	12	0.0764331	0.0427046	GO:0061448	GO:BP	connective tissue development	21110	16392
query_1	TRUE	0.00349678	237	296	15	0.0506757	0.0632911	GO:0045444	GO:BP	fat cell differentiation	21110	12076
query_1	TRUE	0.00376857	716	483	38	0.0786749	0.0530726	GO:0050865	GO:BP	regulation of cell activation	21110	14066
query_1	TRUE	0.00378344	1718	428	64	0.149533	0.0372526	GO:0045893	GO:BP	positive regulation of DNA-templated transcription	21110	12393
query_1	TRUE	0.00378344	1718	428	64	0.149533	0.0372526	GO:1903508	GO:BP	positive regulation of nucleic acid-templated transcription	21110	24159
query_1	TRUE	0.00384481	696	439	35	0.0797267	0.0502874	GO:0009792	GO:BP	embryo development ending in birth or egg hatching	21110	3757
query_1	TRUE	0.00386995	530	171	17	0.0994152	0.0320755	GO:0001525	GO:BP	angiogenesis	21110	344
query_1	TRUE	0.0039	4824	428	140	0.327103	0.0290216	GO:0009059	GO:BP	macromolecule biosynthetic process	21110	3311
query_1	TRUE	0.00394573	106	507	13	0.025641	0.122642	GO:0071347	GO:BP	cellular response to interleukin-1	21110	17545
query_1	TRUE	0.00397163	661	483	36	0.0745342	0.0544629	GO:0002694	GO:BP	regulation of leukocyte activation	21110	1230
query_1	TRUE	0.00398107	476	426	27	0.0633803	0.0567227	GO:0022407	GO:BP	regulation of cell-cell adhesion	21110	6960
query_1	TRUE	0.00415063	63	192	7	0.0364583	0.111111	GO:1904705	GO:BP	regulation of vascular associated smooth muscle cell proliferation	21110	25200
query_1	TRUE	0.00428383	266	419	19	0.0453461	0.0714286	GO:0071559	GO:BP	response to transforming growth factor beta	21110	17709
query_1	TRUE	0.00432688	378	382	22	0.0575916	0.0582011	GO:0007178	GO:BP	transmembrane receptor protein serine/threonine kinase signaling pathway	21110	2803
query_1	TRUE	0.0043371	1725	428	64	0.149533	0.0371014	GO:1902680	GO:BP	positive regulation of RNA biosynthetic process	21110	23482
query_1	TRUE	0.00444356	318	318	18	0.0566038	0.0566038	GO:0031331	GO:BP	positive regulation of cellular catabolic process	21110	7518
query_1	TRUE	0.00444527	43	419	8	0.0190931	0.186047	GO:0043620	GO:BP	regulation of DNA-templated transcription in response to stress	21110	11406
query_1	TRUE	0.00449128	1116	507	53	0.104536	0.047491	GO:0043085	GO:BP	positive regulation of catalytic activity	21110	11100
query_1	TRUE	0.00455061	655	294	26	0.0884354	0.0396947	GO:0048589	GO:BP	developmental growth	21110	13600
query_1	TRUE	0.00462632	1494	483	63	0.130435	0.0421687	GO:0031399	GO:BP	regulation of protein modification process	21110	7552
query_1	TRUE	0.00465912	1333	139	25	0.179856	0.0187547	GO:0019220	GO:BP	regulation of phosphate metabolic process	21110	5898
query_1	TRUE	0.00472224	1334	139	25	0.179856	0.0187406	GO:0051174	GO:BP	regulation of phosphorus metabolic process	21110	14319
query_1	TRUE	0.00488088	333	507	24	0.0473373	0.0720721	GO:0032496	GO:BP	response to lipopolysaccharide	21110	8027
query_1	TRUE	0.00492931	1547	428	59	0.13785	0.0381383	GO:0010558	GO:BP	negative regulation of macromolecule biosynthetic process	21110	4306
query_1	TRUE	0.00494353	67	185	7	0.0378378	0.104478	GO:0014910	GO:BP	regulation of smooth muscle cell migration	21110	4904
query_1	TRUE	0.0049859	15	318	5	0.0157233	0.333333	GO:0060211	GO:BP	regulation of nuclear-transcribed mRNA poly(A) tail shortening	21110	15268
query_1	TRUE	0.0050861	674	439	34	0.0774487	0.0504451	GO:0043009	GO:BP	chordate embryonic development	21110	11060
query_1	TRUE	0.00514339	65	192	7	0.0364583	0.107692	GO:1990874	GO:BP	vascular associated smooth muscle cell proliferation	21110	26569
query_1	TRUE	0.00516722	51	483	9	0.0186335	0.176471	GO:1902895	GO:BP	positive regulation of miRNA transcription	21110	23653
query_1	TRUE	0.00517	1586	428	60	0.140187	0.037831	GO:0031327	GO:BP	negative regulation of cellular biosynthetic process	21110	7514
query_1	TRUE	0.00528532	246	460	19	0.0413043	0.0772358	GO:0050870	GO:BP	positive regulation of T cell activation	21110	14071
query_1	TRUE	0.00530825	558	507	33	0.0650888	0.0591398	GO:2000147	GO:BP	positive regulation of cell motility	21110	26749
query_1	TRUE	0.00556023	764	372	33	0.0887097	0.0431937	GO:0048871	GO:BP	multicellular organismal-level homeostasis	21110	13854
query_1	TRUE	0.00560595	233	488	19	0.0389344	0.0815451	GO:2000116	GO:BP	regulation of cysteine-type endopeptidase activity	21110	26719
query_1	TRUE	0.00570146	203	408	16	0.0392157	0.0788177	GO:0034249	GO:BP	negative regulation of amide metabolic process	21110	8972
query_1	TRUE	0.00579715	2462	483	91	0.188406	0.0369618	GO:0051128	GO:BP	regulation of cellular component organization	21110	14274
query_1	TRUE	0.00582388	951	233	28	0.120172	0.0294427	GO:0019752	GO:BP	carboxylic acid metabolic process	21110	6366
query_1	TRUE	0.0058308	225	507	19	0.0374753	0.0844444	GO:0002573	GO:BP	myeloid leukocyte differentiation	21110	1112
query_1	TRUE	0.00584147	324	419	21	0.0501193	0.0648148	GO:1901214	GO:BP	regulation of neuron death	21110	22269
query_1	TRUE	0.0059536	75	8	3	0.375	0.04	GO:0010822	GO:BP	positive regulation of mitochondrion organization	21110	4538
query_1	TRUE	0.00608754	425	488	27	0.0553279	0.0635294	GO:0006979	GO:BP	response to oxidative stress	21110	2662
query_1	TRUE	0.0067073	1636	428	61	0.142523	0.0372861	GO:0009890	GO:BP	negative regulation of biosynthetic process	21110	3828
query_1	TRUE	0.00710166	2564	428	85	0.198598	0.0331513	GO:0006357	GO:BP	regulation of transcription by RNA polymerase II	21110	2182
query_1	TRUE	0.00712168	433	483	27	0.0559006	0.0623557	GO:0010720	GO:BP	positive regulation of cell development	21110	4445
query_1	TRUE	0.00739393	4061	436	123	0.28211	0.0302881	GO:0019219	GO:BP	regulation of nucleobase-containing compound metabolic process	21110	5897
query_1	TRUE	0.00759499	1076	372	41	0.110215	0.0381041	GO:0009887	GO:BP	animal organ morphogenesis	21110	3825
query_1	TRUE	0.00778957	372	466	24	0.0515021	0.0645161	GO:0050863	GO:BP	regulation of T cell activation	21110	14064
query_1	TRUE	0.0078444	3840	483	128	0.26501	0.0333333	GO:0043412	GO:BP	macromolecule modification	21110	11269
query_1	TRUE	0.0079928	374	282	18	0.0638298	0.0481283	GO:0050727	GO:BP	regulation of inflammatory response	21110	13970
query_1	TRUE	0.00856733	313	373	19	0.0509383	0.0607029	GO:0043588	GO:BP	skin development	21110	11387
query_1	TRUE	0.008604	127	382	12	0.0314136	0.0944882	GO:0045667	GO:BP	regulation of osteoblast differentiation	21110	12218
query_1	TRUE	0.00862541	373	373	21	0.0563003	0.0563003	GO:0071692	GO:BP	protein localization to extracellular region	21110	17810
query_1	TRUE	0.00889727	186	408	15	0.0367647	0.0806452	GO:0009266	GO:BP	response to temperature stimulus	21110	3507
query_1	TRUE	0.00906045	778	426	36	0.084507	0.0462725	GO:0030155	GO:BP	regulation of cell adhesion	21110	7051
query_1	TRUE	0.00909586	69	483	10	0.0207039	0.144928	GO:0061614	GO:BP	miRNA transcription	21110	16494
query_1	TRUE	0.00909734	68	382	9	0.0235602	0.132353	GO:0045669	GO:BP	positive regulation of osteoblast differentiation	21110	12220
query_1	TRUE	0.00950457	449	312	21	0.0673077	0.0467706	GO:0050673	GO:BP	epithelial cell proliferation	21110	13951
query_1	TRUE	0.00969404	206	419	16	0.0381862	0.0776699	GO:0007179	GO:BP	transforming growth factor beta receptor signaling pathway	21110	2804
query_1	TRUE	0.00971158	574	507	33	0.0650888	0.0574913	GO:0040017	GO:BP	positive regulation of locomotion	21110	10470
query_1	TRUE	0.00971538	74	185	7	0.0378378	0.0945946	GO:0014909	GO:BP	smooth muscle cell migration	21110	4903
query_1	TRUE	0.00989106	364	483	24	0.0496894	0.0659341	GO:1903037	GO:BP	regulation of leukocyte cell-cell adhesion	21110	23784
query_1	TRUE	0.00992432	847	426	38	0.0892019	0.0448642	GO:0046649	GO:BP	lymphocyte activation	21110	12996
query_1	TRUE	0.0101879	1780	488	71	0.145492	0.0398876	GO:0006508	GO:BP	proteolysis	21110	2286
query_1	TRUE	0.0103523	446	507	28	0.0552268	0.0627803	GO:0002696	GO:BP	positive regulation of leukocyte activation	21110	1232
query_1	TRUE	0.0106564	229	145	10	0.0689655	0.0436681	GO:0048588	GO:BP	developmental cell growth	21110	13599
query_1	TRUE	0.0109087	150	274	11	0.040146	0.0733333	GO:0050728	GO:BP	negative regulation of inflammatory response	21110	13971
query_1	TRUE	0.0109507	53	266	7	0.0263158	0.132075	GO:0038066	GO:BP	p38MAPK cascade	21110	10232
query_1	TRUE	0.0111267	1558	436	59	0.135321	0.0378691	GO:0045934	GO:BP	negative regulation of nucleobase-containing compound metabolic process	21110	12430
query_1	TRUE	0.0117108	2677	428	87	0.203271	0.0324991	GO:0006366	GO:BP	transcription by RNA polymerase II	21110	2189
query_1	TRUE	0.0121499	526	483	30	0.0621118	0.0570342	GO:0009896	GO:BP	positive regulation of catabolic process	21110	3834
query_1	TRUE	0.0127644	183	483	16	0.0331263	0.0874317	GO:1903708	GO:BP	positive regulation of hemopoiesis	21110	24348
query_1	TRUE	0.0127644	183	483	16	0.0331263	0.0874317	GO:1902107	GO:BP	positive regulation of leukocyte differentiation	21110	23041
query_1	TRUE	0.0129584	1037	507	49	0.0966469	0.0472517	GO:0032101	GO:BP	regulation of response to external stimulus	21110	7777
query_1	TRUE	0.0133589	203	488	17	0.0348361	0.0837438	GO:0043281	GO:BP	regulation of cysteine-type endopeptidase activity involved in apoptotic process	21110	11190
query_1	TRUE	0.0143239	1547	483	63	0.130435	0.040724	GO:0006468	GO:BP	protein phosphorylation	21110	2258
query_1	TRUE	0.0144353	72	381	9	0.023622	0.125	GO:0035914	GO:BP	skeletal muscle cell differentiation	21110	9845
query_1	TRUE	0.0146934	191	266	12	0.0451128	0.0628272	GO:0031099	GO:BP	regeneration	21110	7408
query_1	TRUE	0.0156956	58	483	9	0.0186335	0.155172	GO:2000630	GO:BP	positive regulation of miRNA metabolic process	21110	27190
query_1	TRUE	0.015924	339	462	22	0.047619	0.0648968	GO:0051604	GO:BP	protein maturation	21110	14609
query_1	TRUE	0.015974	1696	307	48	0.156352	0.0283019	GO:0007267	GO:BP	cell-cell signaling	21110	2864
query_1	TRUE	0.0166622	401	483	25	0.0517598	0.0623441	GO:0032102	GO:BP	negative regulation of response to external stimulus	21110	7778
query_1	TRUE	0.0168403	15	408	5	0.0122549	0.333333	GO:1900153	GO:BP	positive regulation of nuclear-transcribed mRNA catabolic process, deadenylation-dependent decay	21110	21359
query_1	TRUE	0.017396	402	483	25	0.0517598	0.0621891	GO:0007159	GO:BP	leukocyte cell-cell adhesion	21110	2786
query_1	TRUE	0.0176388	77	274	8	0.0291971	0.103896	GO:0030330	GO:BP	DNA damage response, signal transduction by p53 class mediator	21110	7142
query_1	TRUE	0.0188496	210	133	9	0.0676692	0.0428571	GO:0051216	GO:BP	cartilage development	21110	14339
query_1	TRUE	0.0188572	104	507	12	0.0236686	0.115385	GO:0030316	GO:BP	osteoclast differentiation	21110	7130
query_1	TRUE	0.0188827	1443	435	55	0.126437	0.038115	GO:0051253	GO:BP	negative regulation of RNA metabolic process	21110	14369
query_1	TRUE	0.0200605	462	507	28	0.0552268	0.0606061	GO:0050867	GO:BP	positive regulation of cell activation	21110	14068
query_1	TRUE	0.0204514	278	488	20	0.0409836	0.0719424	GO:0034599	GO:BP	cellular response to oxidative stress	21110	9144
query_1	TRUE	0.0208373	26	408	6	0.0147059	0.230769	GO:1900151	GO:BP	regulation of nuclear-transcribed mRNA catabolic process, deadenylation-dependent decay	21110	21357
query_1	TRUE	0.0227594	227	274	13	0.0474453	0.0572687	GO:0010632	GO:BP	regulation of epithelial cell migration	21110	4374
query_1	TRUE	0.0234799	1181	139	22	0.158273	0.0186283	GO:0042325	GO:BP	regulation of phosphorylation	21110	10666
query_1	TRUE	0.025389	71	147	6	0.0408163	0.084507	GO:1903201	GO:BP	regulation of oxidative stress-induced cell death	21110	23904
query_1	TRUE	0.0258646	90	507	11	0.0216963	0.122222	GO:0070098	GO:BP	chemokine-mediated signaling pathway	21110	16835
query_1	TRUE	0.0276493	413	483	25	0.0517598	0.0605327	GO:0006417	GO:BP	regulation of translation	21110	2225
query_1	TRUE	0.0277748	95	483	11	0.0227743	0.115789	GO:0010586	GO:BP	miRNA metabolic process	21110	4330
query_1	TRUE	0.0281424	287	483	20	0.0414079	0.0696864	GO:0030336	GO:BP	negative regulation of cell migration	21110	7145
query_1	TRUE	0.0285036	1144	145	22	0.151724	0.0192308	GO:0048666	GO:BP	neuron development	21110	13664
query_1	TRUE	0.028583	1092	387	41	0.105943	0.0375458	GO:0007417	GO:BP	central nervous system development	21110	2983
query_1	TRUE	0.0290802	59	387	8	0.0206718	0.135593	GO:0035904	GO:BP	aorta development	21110	9835
query_1	TRUE	0.0291003	427	381	22	0.0577428	0.0515222	GO:0043434	GO:BP	response to peptide hormone	21110	11281
query_1	TRUE	0.0310764	515	415	26	0.0626506	0.0504854	GO:0009991	GO:BP	response to extracellular stimulus	21110	3893
query_1	TRUE	0.0310849	594	449	30	0.0668151	0.0505051	GO:0007507	GO:BP	heart development	21110	3064
query_1	TRUE	0.0311316	980	462	43	0.0930736	0.0438776	GO:0060341	GO:BP	regulation of cellular localization	21110	15386
query_1	TRUE	0.0312891	85	192	7	0.0364583	0.0823529	GO:0048661	GO:BP	positive regulation of smooth muscle cell proliferation	21110	13659
query_1	TRUE	0.0319151	169	381	13	0.0341207	0.0769231	GO:0007519	GO:BP	skeletal muscle tissue development	21110	3072
query_1	TRUE	0.0324231	1787	139	28	0.201439	0.0156687	GO:0016310	GO:BP	phosphorylation	21110	5324
query_1	TRUE	0.0332105	23	507	6	0.0118343	0.26087	GO:0072677	GO:BP	eosinophil migration	21110	18470
query_1	TRUE	0.0341722	1789	334	52	0.155689	0.0290665	GO:1901566	GO:BP	organonitrogen compound biosynthetic process	21110	22565
query_1	TRUE	0.0351369	429	274	18	0.0656934	0.041958	GO:0001667	GO:BP	ameboidal-type cell migration	21110	392
query_1	TRUE	0.0351937	80	483	10	0.0207039	0.125	GO:2000628	GO:BP	regulation of miRNA metabolic process	21110	27188
query_1	TRUE	0.0362253	41	419	7	0.0167064	0.170732	GO:0140467	GO:BP	integrated stress response signaling	21110	20877
query_1	TRUE	0.036421	219	488	17	0.0348361	0.0776256	GO:0009612	GO:BP	response to mechanical stimulus	21110	3617
query_1	TRUE	0.0371335	406	500	25	0.05	0.0615764	GO:0052547	GO:BP	regulation of peptidase activity	21110	14960
query_1	TRUE	0.0376352	256	507	19	0.0374753	0.0742188	GO:0051402	GO:BP	neuron apoptotic process	21110	14471
query_1	TRUE	0.0394363	5521	428	151	0.352804	0.0273501	GO:0044249	GO:BP	cellular biosynthetic process	21110	11577
query_1	TRUE	0.0394964	1072	483	47	0.0973085	0.0438433	GO:0001932	GO:BP	regulation of protein phosphorylation	21110	561
query_1	TRUE	0.0395396	708	500	36	0.072	0.0508475	GO:0030162	GO:BP	regulation of proteolysis	21110	7053
query_1	TRUE	0.0425022	37	185	5	0.027027	0.135135	GO:0014911	GO:BP	positive regulation of smooth muscle cell migration	21110	4905
query_1	TRUE	0.0432822	5	256	3	0.0117188	0.6	GO:0045900	GO:BP	negative regulation of translational elongation	21110	12398
query_1	TRUE	0.046173	1823	507	72	0.142012	0.0394953	GO:0006952	GO:BP	defense response	21110	2641
query_1	TRUE	0.0462981	63	507	9	0.0177515	0.142857	GO:0031663	GO:BP	lipopolysaccharide-mediated signaling pathway	21110	7671
query_1	TRUE	0.0466764	91	264	8	0.030303	0.0879121	GO:1902882	GO:BP	regulation of response to oxidative stress	21110	23643
query_1	TRUE	0.0492969	106	11	3	0.272727	0.0283019	GO:0008637	GO:BP	apoptotic mitochondrial changes	21110	3296
query_1	TRUE	0.0499409	9	133	3	0.0225564	0.333333	GO:0032909	GO:BP	regulation of transforming growth factor beta2 production	21110	8329
query_1	TRUE	0.0499409	9	133	3	0.0225564	0.333333	GO:0032906	GO:BP	transforming growth factor beta2 production	21110	8326
query_1	TRUE	1.15543e-11	12365	362	271	0.748619	0.0219167	GO:0005737	GO:CC	cytoplasm	22122	309
query_1	TRUE	3.46246e-06	5453	335	129	0.385075	0.0236567	GO:0005829	GO:CC	cytosol	22122	380
query_1	TRUE	4.1679e-06	6303	136	70	0.514706	0.0111058	GO:0071944	GO:CC	cell periphery	22122	2801
query_1	TRUE	8.91603e-06	4236	162	61	0.376543	0.0144004	GO:0005576	GO:CC	extracellular region	22122	198
query_1	TRUE	2.72215e-05	523	419	30	0.071599	0.0573614	GO:0005667	GO:CC	transcription regulator complex	22122	262
query_1	TRUE	0.00012466	4203	451	129	0.286031	0.0306924	GO:0005654	GO:CC	nucleoplasm	22122	252
query_1	TRUE	0.000255568	5819	144	65	0.451389	0.0111703	GO:0005886	GO:CC	plasma membrane	22122	424
query_1	TRUE	0.000440976	567	372	27	0.0725806	0.047619	GO:0031012	GO:CC	extracellular matrix	22122	1031
query_1	TRUE	0.000455952	568	372	27	0.0725806	0.0475352	GO:0030312	GO:CC	external encapsulating structure	22122	930
query_1	TRUE	0.000707203	257	419	18	0.0429594	0.0700389	GO:0090575	GO:CC	RNA polymerase II transcription regulator complex	22122	2866
query_1	TRUE	0.00128132	3998	165	54	0.327273	0.0135068	GO:0031982	GO:CC	vesicle	22122	1231
query_1	TRUE	0.00183939	3384	253	66	0.26087	0.0195035	GO:0005615	GO:CC	extracellular space	22122	232
query_1	TRUE	0.00206185	1648	359	51	0.142061	0.0309466	GO:0005794	GO:CC	Golgi apparatus	22122	358
query_1	TRUE	0.00300077	1369	436	51	0.116972	0.0372535	GO:0000785	GO:CC	chromatin	22122	92
query_1	TRUE	0.00339521	6635	337	138	0.409496	0.0207988	GO:0031974	GO:CC	membrane-enclosed lumen	22122	1224
query_1	TRUE	0.00339521	6635	337	138	0.409496	0.0207988	GO:0070013	GO:CC	intracellular organelle lumen	22122	2406
query_1	TRUE	0.00339521	6635	337	138	0.409496	0.0207988	GO:0043233	GO:CC	organelle lumen	22122	1890
query_1	TRUE	0.00423979	2510	496	88	0.177419	0.0350598	GO:0031410	GO:CC	cytoplasmic vesicle	22122	1109
query_1	TRUE	0.00443795	2513	496	88	0.177419	0.0350179	GO:0097708	GO:CC	intracellular vesicle	22122	3146
query_1	TRUE	0.0045491	421	472	24	0.0508475	0.0570071	GO:0016607	GO:CC	nuclear speck	22122	771
query_1	TRUE	0.00516133	4776	474	141	0.297468	0.0295226	GO:0012505	GO:CC	endomembrane system	22122	689
query_1	TRUE	0.00523966	124	479	12	0.0250522	0.0967742	GO:1904813	GO:CC	ficolin-1-rich granule lumen	22122	3694
query_1	TRUE	0.00587051	58	124	5	0.0403226	0.0862069	GO:0098636	GO:CC	protein complex involved in cell adhesion	22122	3233
query_1	TRUE	0.010592	249	479	17	0.0354906	0.0682731	GO:0036464	GO:CC	cytoplasmic ribonucleoprotein granule	22122	1723
query_1	TRUE	0.0114606	430	149	12	0.0805369	0.027907	GO:0062023	GO:CC	collagen-containing extracellular matrix	22122	2367
query_1	TRUE	0.0167003	100	89	5	0.0561798	0.05	GO:0043202	GO:CC	lysosomal lumen	22122	1874
query_1	TRUE	0.0170354	972	502	42	0.0836653	0.0432099	GO:0009986	GO:CC	cell surface	22122	663
query_1	TRUE	0.0208857	5	419	3	0.0071599	0.6	GO:0035976	GO:CC	transcription factor AP-1 complex	22122	1661
query_1	TRUE	0.0252709	267	479	17	0.0354906	0.0636704	GO:0035770	GO:CC	ribonucleoprotein granule	22122	1643
query_1	TRUE	0.0265563	178	89	6	0.0674157	0.0337079	GO:0005775	GO:CC	vacuolar lumen	22122	342
query_1	TRUE	0.0334779	491	5	3	0.6	0.00610998	GO:0005759	GO:CC	mitochondrial matrix	22122	327
query_1	TRUE	0.0373373	885	480	37	0.0770833	0.0418079	GO:0016604	GO:CC	nuclear body	22122	768
query_1	TRUE	0.0383575	289	113	8	0.0707965	0.0276817	GO:0045178	GO:CC	basal part of cell	22122	2144
query_1	TRUE	0.0402247	1411	479	52	0.108559	0.0368533	GO:0099080	GO:CC	supramolecular complex	22122	3350
query_1	TRUE	0.0413216	2109	162	31	0.191358	0.0146989	GO:0070062	GO:CC	extracellular exosome	22122	2425
query_1	TRUE	0.0428461	893	479	37	0.0772443	0.0414334	GO:0030141	GO:CC	secretory granule	22122	919
query_1	TRUE	2.27249e-08	2093	428	90	0.21028	0.0430005	GO:0019899	GO:MF	enzyme binding	20195	3754
query_1	TRUE	8.52093e-08	14881	454	390	0.859031	0.0262079	GO:0005515	GO:MF	protein binding	20195	1496
query_1	TRUE	1.39247e-05	274	465	24	0.0516129	0.0875912	GO:1901681	GO:MF	sulfur compound binding	20195	10994
query_1	TRUE	1.56596e-05	173	377	17	0.0450928	0.0982659	GO:0008201	GO:MF	heparin binding	20195	1614
query_1	TRUE	2.05573e-05	244	377	20	0.0530504	0.0819672	GO:0005539	GO:MF	glycosaminoglycan binding	20195	1511
query_1	TRUE	2.14868e-05	63	230	9	0.0391304	0.142857	GO:1990841	GO:MF	promoter-specific chromatin binding	20195	11220
query_1	TRUE	6.27238e-05	1321	377	53	0.140584	0.0401211	GO:0140677	GO:MF	molecular function activator activity	20195	10737
query_1	TRUE	6.96153e-05	1311	381	53	0.139108	0.0404272	GO:0044877	GO:MF	protein-containing complex binding	20195	6099
query_1	TRUE	0.000120995	158	145	10	0.0689655	0.0632911	GO:0005178	GO:MF	integrin binding	20195	1345
query_1	TRUE	0.000391622	33	472	8	0.0169492	0.242424	GO:0140662	GO:MF	ATP-dependent protein folding chaperone	20195	10730
query_1	TRUE	0.000444498	2301	158	40	0.253165	0.0173837	GO:0097367	GO:MF	carbohydrate derivative binding	20195	9193
query_1	TRUE	0.000444761	792	424	39	0.0919811	0.0492424	GO:0019900	GO:MF	kinase binding	20195	3755
query_1	TRUE	0.000657929	60	472	10	0.0211864	0.166667	GO:0044183	GO:MF	protein folding chaperone	20195	6033
query_1	TRUE	0.00119467	353	428	23	0.0537383	0.0651558	GO:0061629	GO:MF	RNA polymerase II-specific DNA-binding transcription factor binding	20195	8515
query_1	TRUE	0.0015032	709	423	35	0.0827423	0.0493653	GO:0019901	GO:MF	protein kinase binding	20195	3756
query_1	TRUE	0.00202329	2057	368	66	0.179348	0.0320856	GO:0098772	GO:MF	molecular function regulator activity	20195	9275
query_1	TRUE	0.0021324	71	67	5	0.0746269	0.0704225	GO:0002039	GO:MF	p53 binding	20195	289
query_1	TRUE	0.00225846	20	254	5	0.019685	0.25	GO:0004653	GO:MF	polypeptide N-acetylgalactosaminyltransferase activity	20195	960
query_1	TRUE	0.00368063	562	373	27	0.0723861	0.0480427	GO:0050839	GO:MF	cell adhesion molecule binding	20195	7987
query_1	TRUE	0.0049695	471	426	26	0.0610329	0.0552017	GO:0001228	GO:MF	DNA-binding transcription activator activity, RNA polymerase II-specific	20195	185
query_1	TRUE	0.00576484	475	426	26	0.0610329	0.0547368	GO:0001216	GO:MF	DNA-binding transcription activator activity	20195	179
query_1	TRUE	0.00580509	5758	480	180	0.375	0.0312609	GO:0003824	GO:MF	catalytic activity	20195	368
query_1	TRUE	0.011157	707	408	32	0.0784314	0.0452617	GO:0017111	GO:MF	ribonucleoside triphosphate phosphatase activity	20195	3167
query_1	TRUE	0.0149747	596	199	18	0.0904523	0.0302013	GO:0008047	GO:MF	enzyme activator activity	20195	1536
query_1	TRUE	0.0154064	6120	173	78	0.450867	0.0127451	GO:0043167	GO:MF	ion binding	20195	5760
query_1	TRUE	0.0196251	375	479	23	0.0480167	0.0613333	GO:0016887	GO:MF	ATP hydrolysis activity	20195	3076
query_1	TRUE	0.0230686	770	479	37	0.0772443	0.0480519	GO:0016462	GO:MF	pyrophosphatase activity	20195	2823
query_1	TRUE	0.0232169	15	93	3	0.0322581	0.2	GO:1990226	GO:MF	histone methyltransferase binding	20195	11124
query_1	TRUE	0.0237055	771	479	37	0.0772443	0.0479896	GO:0016818	GO:MF	hydrolase activity, acting on acid anhydrides, in phosphorus-containing anhydrides	20195	3019
query_1	TRUE	0.0237055	771	479	37	0.0772443	0.0479896	GO:0016817	GO:MF	hydrolase activity, acting on acid anhydrides	20195	3018
query_1	TRUE	0.0245527	70	373	8	0.0214477	0.114286	GO:0005518	GO:MF	collagen binding	20195	1498
query_1	TRUE	0.0251681	141	296	10	0.0337838	0.070922	GO:0016922	GO:MF	nuclear receptor binding	20195	3099
query_1	TRUE	0.0257702	174	149	8	0.0536913	0.045977	GO:0005201	GO:MF	extracellular matrix structural constituent	20195	1354
query_1	TRUE	0.0273198	1300	235	32	0.13617	0.0246154	GO:0030234	GO:MF	enzyme regulator activity	20195	3885
query_1	TRUE	0.0284136	489	428	25	0.0584112	0.0511247	GO:0140297	GO:MF	DNA-binding transcription factor binding	20195	10605
query_1	TRUE	0.0284982	5	351	3	0.00854701	0.6	GO:0034186	GO:MF	apolipoprotein A-I binding	20195	4962
query_1	TRUE	0.0288996	575	479	30	0.0626305	0.0521739	GO:0140657	GO:MF	ATP-dependent activity	20195	10725
query_1	TRUE	0.0291394	14	108	3	0.0277778	0.214286	GO:0140537	GO:MF	transcription regulator activator activity	20195	10687
query_1	TRUE	0.0347666	297	424	18	0.0424528	0.0606061	GO:0031625	GO:MF	ubiquitin protein ligase binding	20195	4176
query_1	TRUE	0.0348813	2479	472	87	0.184322	0.0350948	GO:0016787	GO:MF	hydrolase activity	20195	2996
query_1	TRUE	0.0351041	34	254	5	0.019685	0.147059	GO:0008376	GO:MF	acetylgalactosaminyltransferase activity	20195	1673
query_1	TRUE	0.042012	114	472	11	0.0233051	0.0964912	GO:0051082	GO:MF	unfolded protein binding	20195	8018
query_1	TRUE	0.0486155	599	428	28	0.0654206	0.0467446	GO:0008134	GO:MF	transcription factor binding	20195	1575
query_1	TRUE	0.0210504	91	419	14	0.0334129	0.153846	KEGG:04657	KEGG	IL-17 signaling pathway	8161	329
query_1	TRUE	0.0349238	205	127	11	0.0866142	0.0536585	KEGG:05205	KEGG	Proteoglycans in cancer	8161	450
query_1	TRUE	0.000866113	43	149	7	0.0469799	0.162791	REAC:R-HSA-1566948	REAC	Elastic fibre formation	10790	798
query_1	TRUE	0.00198706	39	464	10	0.0215517	0.25641	REAC:R-HSA-9031628	REAC	NGF-stimulated transcription	10790	1442
query_1	TRUE	0.00425264	36	149	6	0.0402685	0.166667	REAC:R-HSA-2129379	REAC	Molecules associated with elastic fibres	10790	1409
query_1	TRUE	0.0118969	6	117	3	0.025641	0.5	REAC:R-HSA-5336415	REAC	Uptake and function of diphtheria toxin	10790	2490
query_1	TRUE	0.024105	61	464	11	0.0237069	0.180328	REAC:R-HSA-198725	REAC	Nuclear Events (kinase and transcription factor activation)	10790	1528
query_1	TRUE	0.0396435	67	444	11	0.0247748	0.164179	REAC:R-HSA-400253	REAC	Circadian Clock	10790	348
query_1	TRUE	3.43034e-06	9846	403	258	0.640199	0.0262035	TF:M00915	TF	Factor: AP-2; motif: SNNNCCNCAGGCN	20011	156
query_1	TRUE	6.24191e-06	10475	448	296	0.660714	0.0282578	TF:M00803_1	TF	Factor: E2F; motif: GGCGSG; match class: 1	20011	1549
query_1	TRUE	1.00859e-05	7207	466	229	0.491416	0.0317747	TF:M00695_1	TF	Factor: ETF; motif: GVGGMGG; match class: 1	20011	2165
query_1	TRUE	2.23064e-05	6819	466	218	0.467811	0.0319695	TF:M12722_1	TF	Factor: ZXDL; motif: GSGSCNNGGGMRGCNCCGGGS; match class: 1	20011	11647
query_1	TRUE	5.73275e-05	5454	479	186	0.388309	0.0341034	TF:M02036_1	TF	Factor: WT1; motif: CGCCCCCNCN; match class: 1	20011	8987
query_1	TRUE	7.95353e-05	8018	451	238	0.527716	0.0296832	TF:M00982	TF	Factor: KROX; motif: CCCGCCCCCRCCCC	20011	4612
query_1	TRUE	0.000132048	10824	466	309	0.66309	0.0285477	TF:M12722	TF	Factor: ZXDL; motif: GSGSCNNGGGMRGCNCCGGGS	20011	11646
query_1	TRUE	0.000144895	4459	477	157	0.32914	0.0352097	TF:M01199_1	TF	Factor: RNF96; motif: BCCCGCRGCC; match class: 1	20011	7291
query_1	TRUE	0.000173709	5671	322	136	0.42236	0.0239817	TF:M07250_1	TF	Factor: E2F-1; motif: NNNSSCGCSAANN; match class: 1	20011	1453
query_1	TRUE	0.000539454	4675	447	152	0.340045	0.0325134	TF:M00915_1	TF	Factor: AP-2; motif: SNNNCCNCAGGCN; match class: 1	20011	157
query_1	TRUE	0.000711706	6239	466	197	0.422747	0.0315756	TF:M00189_1	TF	Factor: AP-2; motif: MKCCCSCNGGCG; match class: 1	20011	155
query_1	TRUE	0.000834597	10683	474	307	0.647679	0.0287372	TF:M00695	TF	Factor: ETF; motif: GVGGMGG	20011	2164
query_1	TRUE	0.000849928	3757	479	135	0.281837	0.0359329	TF:M07354_1	TF	Factor: Egr-1; motif: GCGGGGGCGG; match class: 1	20011	1631
query_1	TRUE	0.000871936	9321	466	271	0.581545	0.0290741	TF:M00800	TF	Factor: AP-2; motif: GSCCSCRGGCNRNRNN	20011	150
query_1	TRUE	0.00097374	9415	449	264	0.587973	0.0280404	TF:M09892_1	TF	Factor: E2F-1; motif: NNNNGGCGGGAARN; match class: 1	20011	1441
query_1	TRUE	0.00141581	6414	466	200	0.429185	0.0311818	TF:M10072_1	TF	Factor: sp4; motif: NNGNARGRGGCGGRGCNNRR; match class: 1	20011	7895
query_1	TRUE	0.00222727	10654	453	292	0.644592	0.0274075	TF:M00986_1	TF	Factor: Churchill; motif: CGGGNN; match class: 1	20011	835
query_1	TRUE	0.00240303	7472	417	204	0.489209	0.0273019	TF:M00938	TF	Factor: E2F-1; motif: TTGGCGCGRAANNGNM	20011	1448
query_1	TRUE	0.00249819	10003	474	289	0.609705	0.0288913	TF:M02036	TF	Factor: WT1; motif: CGCCCCCNCN	20011	8986
query_1	TRUE	0.00264573	10555	316	209	0.661392	0.019801	TF:M00931	TF	Factor: Sp1; motif: GGGGCGGGGC	20011	7856
query_1	TRUE	0.00268678	8635	318	180	0.566038	0.0208454	TF:M03807	TF	Factor: SP2; motif: GNNGGGGGCGGGGSN	20011	7880
query_1	TRUE	0.00301319	2945	437	102	0.23341	0.034635	TF:M12461	TF	Factor: ZBTB14; motif: SSCCGCGCACNS	20011	9094
query_1	TRUE	0.00334943	7609	474	231	0.487342	0.0303588	TF:M01858	TF	Factor: AP-2beta; motif: GCNNNGGSCNGVGGGN	20011	136
query_1	TRUE	0.00337495	8430	474	251	0.529536	0.0297746	TF:M12351_1	TF	Factor: TIEG1; motif: NCCCNSNCCCCGCCCCC; match class: 1	20011	8783
query_1	TRUE	0.00337521	3423	464	120	0.258621	0.035057	TF:M12593_1	TF	Factor: CTCF; motif: NNRSYGCCMCCTGSTGGCCN; match class: 1	20011	1153
query_1	TRUE	0.00447145	6592	458	199	0.434498	0.0301881	TF:M04107_1	TF	Factor: RUNX2; motif: WRACCGCANWAACCGCAN; match class: 1	20011	7355
query_1	TRUE	0.00455922	10870	466	303	0.650215	0.0278749	TF:M00189	TF	Factor: AP-2; motif: MKCCCSCNGGCG	20011	154
query_1	TRUE	0.00488004	8103	480	245	0.510417	0.0302357	TF:M07354	TF	Factor: Egr-1; motif: GCGGGGGCGG	20011	1630
query_1	TRUE	0.0051151	9784	466	278	0.596567	0.0284137	TF:M09984	TF	Factor: MAZ; motif: GGGGGAGGGGGNGRGRRRGNRG	20011	4994
query_1	TRUE	0.00597204	10509	323	211	0.653251	0.020078	TF:M00196	TF	Factor: Sp1; motif: NGGGGGCGGGGYN	20011	7854
query_1	TRUE	0.00611374	6861	466	208	0.446352	0.0303163	TF:M07249	TF	Factor: ctcf; motif: CCNCNAGRKGGCRSTN	20011	1154
query_1	TRUE	0.00618541	4496	466	148	0.317597	0.0329181	TF:M10426_1	TF	Factor: ctcf; motif: CCRSCAGGGGGCGCN; match class: 1	20011	1151
query_1	TRUE	0.00641225	7915	323	169	0.52322	0.0213519	TF:M09970	TF	Factor: KLF3; motif: NNNNNNGGGCGGGGCNNGN	20011	4570
query_1	TRUE	0.00739357	12637	466	341	0.73176	0.0269843	TF:M12351	TF	Factor: TIEG1; motif: NCCCNSNCCCCGCCCCC	20011	8782
query_1	TRUE	0.00794586	7005	320	152	0.475	0.0216988	TF:M01118	TF	Factor: WT1; motif: SMCNCCNSC	20011	8984
query_1	TRUE	0.0086099	1776	286	50	0.174825	0.0281532	TF:M02106	TF	Factor: NF-YA; motif: CRGCCAATCAGNRN	20011	5740
query_1	TRUE	0.0090229	3193	439	107	0.243736	0.0335108	TF:M12697	TF	Factor: ZNF142; motif: SNSCGCCCGCCCGCSCSS	20011	9502
query_1	TRUE	0.00905459	7674	480	233	0.485417	0.0303623	TF:M08878	TF	Factor: EGR; motif: CGCCCCCGCNN	20011	1670
query_1	TRUE	0.00940805	8362	461	241	0.522777	0.0288209	TF:M07040_1	TF	Factor: GKLF; motif: NNRRGRRNGNSNNN; match class: 1	20011	3167
query_1	TRUE	0.0103675	5419	323	125	0.386997	0.023067	TF:M09658	TF	Factor: Sp2; motif: GGSNNGGGGGCGGGGCCNGNGS	20011	7868
query_1	TRUE	0.0106614	10705	323	213	0.659443	0.0198972	TF:M00932	TF	Factor: Sp1; motif: NNGGGGCGGGGNN	20011	7852
query_1	TRUE	0.0107198	2717	479	101	0.210856	0.0371734	TF:M10111	TF	Factor: ZF5; motif: NGAGCGCGC	20011	9224
query_1	TRUE	0.0107503	4034	305	95	0.311475	0.0235498	TF:M10112_1	TF	Factor: Miz-1; motif: NNRGGWGGGGGAGGGGMRR; match class: 1	20011	5201
query_1	TRUE	0.0137159	6888	451	201	0.445676	0.0291812	TF:M01873	TF	Factor: Egr-1; motif: GCGGGGGCGG	20011	1632
query_1	TRUE	0.014019	10931	323	216	0.668731	0.0197603	TF:M07395	TF	Factor: Sp1; motif: NGGGGCGGGGN	20011	7848
query_1	TRUE	0.0143948	7224	427	199	0.466042	0.0275471	TF:M10098	TF	Factor: DP-1; motif: NRNNGGCGGGAANN	20011	8666
query_1	TRUE	0.0145902	2849	472	103	0.21822	0.036153	TF:M12642	TF	Factor: NFYA; motif: NNRGCCAATSRGMRSSNNSN	20011	5738
query_1	TRUE	0.0148289	9627	466	272	0.583691	0.0282539	TF:M02089_1	TF	Factor: E2F-3; motif: GGCGGGN; match class: 1	20011	1497
query_1	TRUE	0.014911	6093	466	187	0.401288	0.030691	TF:M00196_1	TF	Factor: Sp1; motif: NGGGGGCGGGGYN; match class: 1	20011	7855
query_1	TRUE	0.0158458	2608	322	71	0.220497	0.0272239	TF:M12464_1	TF	Factor: ZNF148; motif: NNCCCCTCCCCC; match class: 1	20011	9509
query_1	TRUE	0.0167783	7040	344	161	0.468023	0.0228693	TF:M12464	TF	Factor: ZNF148; motif: NNCCCCTCCCCC	20011	9508
query_1	TRUE	0.0181131	510	403	27	0.0669975	0.0529412	TF:M10111_1	TF	Factor: ZF5; motif: NGAGCGCGC; match class: 1	20011	9225
query_1	TRUE	0.0198167	8209	315	168	0.533333	0.0204653	TF:M07380_1	TF	Factor: E2F-4; motif: NTTTCSCGCC; match class: 1	20011	1517
query_1	TRUE	0.0207909	4745	466	152	0.32618	0.0320337	TF:M10071_1	TF	Factor: Sp1; motif: NGGGGGCGGGGCCNGGGGGGGG; match class: 1	20011	7837
query_1	TRUE	0.0209517	3413	367	96	0.26158	0.0281277	TF:M05444_1	TF	Factor: CPBP; motif: NGGGCGG; match class: 1	20011	943
query_1	TRUE	0.0209517	3413	367	96	0.26158	0.0281277	TF:M05332_1	TF	Factor: Sp2; motif: WGGGCGG; match class: 1	20011	7863
query_1	TRUE	0.0209517	3413	367	96	0.26158	0.0281277	TF:M05361_1	TF	Factor: Sp6; motif: WGGGCGG; match class: 1	20011	7907
query_1	TRUE	0.0228975	3032	417	97	0.232614	0.0319921	TF:M01219_1	TF	Factor: SP1:SP3; motif: CCSCCCCCYCC; match class: 1	20011	7821
query_1	TRUE	0.0247838	8597	452	240	0.530973	0.0279167	TF:M04106_1	TF	Factor: RUNX2; motif: NRACCGCAAACCGCAN; match class: 1	20011	7353
query_1	TRUE	0.0250219	6300	466	191	0.409871	0.0303175	TF:M09723_1	TF	Factor: BTEB1; motif: GGGGGCGGGGCNGSGGGNGS; match class: 1	20011	613
query_1	TRUE	0.0259683	7899	314	162	0.515924	0.0205089	TF:M10435	TF	Factor: Sp2; motif: GGGGCGGGG	20011	7870
query_1	TRUE	0.0295428	3912	447	125	0.279642	0.031953	TF:M03811_1	TF	Factor: AP-2gamma; motif: GCCYNCRGSN; match class: 1	20011	145
query_1	TRUE	0.0301597	7982	449	224	0.498886	0.0280631	TF:M09895	TF	Factor: E2F-6; motif: NGGGCGGGARRNN	20011	1524
query_1	TRUE	0.030671	11181	440	290	0.659091	0.0259369	TF:M04950	TF	Factor: Egr-1; motif: NGCGTGCGY	20011	1612
query_1	TRUE	0.031259	2964	473	105	0.221987	0.0354251	TF:M09834_1	TF	Factor: ZNF148; motif: NNNNNNCCNNCCCCTCCCCCACCCN; match class: 1	20011	9507
query_1	TRUE	0.0324824	12643	466	338	0.725322	0.0267342	TF:M11531_1	TF	Factor: E2F-2; motif: GCGCGCGCGYW; match class: 1	20011	1473
query_1	TRUE	0.0331079	2665	416	87	0.209135	0.0326454	TF:M00938_1	TF	Factor: E2F-1; motif: TTGGCGCGRAANNGNM; match class: 1	20011	1449
query_1	TRUE	0.0355694	4465	479	147	0.306889	0.0329227	TF:M12703_1	TF	Factor: ZNF383; motif: SSNGGGMGGNGSNGGS; match class: 1	20011	10111
query_1	TRUE	0.037137	1400	328	45	0.137195	0.0321429	TF:M12057_1	TF	Factor: ZBP99; motif: GCCCMTCCCCCR; match class: 1	20011	9271
query_1	TRUE	0.0378153	9710	474	276	0.582278	0.0284243	TF:M11022	TF	Factor: IRX2a; motif: ACRYGNNNNACRYGT	20011	4384
query_1	TRUE	0.039346	4193	473	138	0.291755	0.032912	TF:M04953_1	TF	Factor: Sp1; motif: GGNDGGRGGCGGGG; match class: 1	20011	7831
query_1	TRUE	0.0417339	12421	297	219	0.737374	0.0176314	TF:M00360	TF	Factor: Pax-3; motif: TCGTCACRCTTHM	20011	6338
query_1	TRUE	0.0429524	2750	309	70	0.226537	0.0254545	TF:M01873_1	TF	Factor: Egr-1; motif: GCGGGGGCGG; match class: 1	20011	1633
query_1	TRUE	0.0436152	2915	473	103	0.217759	0.0353345	TF:M12616	TF	Factor: HMGXB3; motif: NRGCCAATSRGNRNNS	20011	3474
query_1	TRUE	0.0465879	11111	449	293	0.652561	0.0263703	TF:M07084	TF	Factor: E2F-4; motif: NGGCGGGAARN	20011	1508
query_1	TRUE	0.046653	1825	477	72	0.150943	0.0394521	TF:M12345_1	TF	Factor: Zbtb37; motif: NYACCGCRNTCACCGCR; match class: 1	20011	9131
query_1	TRUE	0.046943	5279	463	163	0.352052	0.0308771	TF:M00469	TF	Factor: AP-2alpha; motif: GCCNNNRGS	20011	126

## Sheet: GO_SB vs iSB_DOWN DEGs
query	significant	p_value	term_size	query_size	intersection_size	precision	recall	term_id	source	term_name	effective_domain_size	source_order
query_1	TRUE	2.6455e-06	185	15	6	0.4	0.0324324	GO:0007565	GO:BP	female pregnancy	21110	3114
query_1	TRUE	5.04642e-06	206	15	6	0.4	0.0291262	GO:0044703	GO:BP	multi-organism reproductive process	21110	11803
query_1	TRUE	6.70492e-06	216	15	6	0.4	0.0277778	GO:0044706	GO:BP	multi-multicellular organism process	21110	11804
query_1	TRUE	0.000550466	27	12	3	0.25	0.111111	GO:0060396	GO:BP	growth hormone receptor signaling pathway	21110	15437
query_1	TRUE	0.000550466	27	12	3	0.25	0.111111	GO:0071378	GO:BP	cellular response to growth hormone stimulus	21110	17576
query_1	TRUE	0.00171331	39	12	3	0.25	0.0769231	GO:0060416	GO:BP	response to growth hormone	21110	15455
query_1	TRUE	0.00303209	47	12	3	0.25	0.0638298	GO:0046427	GO:BP	positive regulation of receptor signaling pathway via JAK-STAT	21110	12846
query_1	TRUE	0.00366154	50	12	3	0.25	0.06	GO:1904894	GO:BP	positive regulation of receptor signaling pathway via STAT	21110	25362
query_1	TRUE	0.00812092	65	12	3	0.25	0.0461538	GO:0042531	GO:BP	positive regulation of tyrosine phosphorylation of STAT protein	21110	10802
query_1	TRUE	0.0135478	77	12	3	0.25	0.038961	GO:0042509	GO:BP	regulation of tyrosine phosphorylation of STAT protein	21110	10801
query_1	TRUE	0.0139167	260	12	4	0.333333	0.0153846	GO:0045927	GO:BP	positive regulation of growth	21110	12423
query_1	TRUE	0.0152019	80	12	3	0.25	0.0375	GO:0007260	GO:BP	tyrosine phosphorylation of STAT protein	21110	2859
query_1	TRUE	0.0315462	102	12	3	0.25	0.0294118	GO:0046425	GO:BP	regulation of receptor signaling pathway via JAK-STAT	21110	12844
query_1	TRUE	0.0374372	108	12	3	0.25	0.0277778	GO:1904892	GO:BP	regulation of receptor signaling pathway via STAT	21110	25360
query_1	TRUE	0.00019577	972	15	7	0.466667	0.00720165	GO:0009986	GO:CC	cell surface	22122	663
query_1	TRUE	0.00106555	4236	15	11	0.733333	0.00259679	GO:0005576	GO:CC	extracellular region	22122	198
query_1	TRUE	0.0252893	5819	15	11	0.733333	0.00189036	GO:0005886	GO:CC	plasma membrane	22122	424
query_1	TRUE	5.596e-08	123	15	6	0.4	0.0487805	GO:1990782	GO:MF	protein tyrosine kinase binding	20195	11210
query_1	TRUE	6.83348e-06	11	12	3	0.25	0.272727	GO:0005131	GO:MF	growth hormone receptor binding	20195	1303
query_1	TRUE	0.000183956	127	12	4	0.333333	0.0314961	GO:0005179	GO:MF	hormone activity	20195	1346
query_1	TRUE	0.000224304	33	12	3	0.25	0.0909091	GO:0051427	GO:MF	hormone receptor binding	20195	8054
query_1	TRUE	0.00181216	709	15	6	0.4	0.00846262	GO:0019901	GO:MF	protein kinase binding	20195	3756
query_1	TRUE	0.00341582	792	15	6	0.4	0.00757576	GO:0019900	GO:MF	kinase binding	20195	3755
query_1	TRUE	0.0283991	164	12	3	0.25	0.0182927	GO:0008083	GO:MF	growth factor activity	20195	1545
query_1	TRUE	0.0412801	502	12	4	0.333333	0.00796813	GO:0048018	GO:MF	receptor ligand activity	20195	7308
query_1	TRUE	0.0438704	510	12	4	0.333333	0.00784314	GO:0030546	GO:MF	signaling receptor activator activity	20195	3967
query_1	TRUE	3.51308e-05	190	15	6	0.4	0.0315789	REAC:R-HSA-202733	REAC	Cell surface interactions at the vascular wall	10790	315
query_1	TRUE	6.41722e-05	1700	15	10	0.666667	0.00588235	TF:M09916_1	TF	Factor: Erm; motif: NRRSAGGAARNGRN; match class: 1	20011	2051
query_1	TRUE	7.62393e-05	839	15	8	0.533333	0.00953516	TF:M04485_1	TF	Factor: RARG; motif: RAGGTCAASYARAGGTCA; match class: 1	20011	7087
query_1	TRUE	0.00139273	1912	14	9	0.642857	0.00470711	TF:M00762	TF	Factor: PPAR,; motif: RGGNCAAAGGTCA	20011	1366
query_1	TRUE	0.00246737	962	14	7	0.5	0.00727651	TF:M04474	TF	Factor: COUP-TF1; motif: GRGGTCAN	20011	5964
query_1	TRUE	0.00261577	889	15	7	0.466667	0.00787402	TF:M11615	TF	Factor: TCF-3; motif: ASATCAAAG	20011	8396
query_1	TRUE	0.00293523	294	15	5	0.333333	0.0170068	TF:M08881_1	TF	Factor: ETSLIKE; motif: NACTTCCTNN; match class: 1	20011	2189
query_1	TRUE	0.00298757	1353	15	8	0.533333	0.00591279	TF:M00984	TF	Factor: PEBP; motif: GNTNACCACARANNK	20011	6528
query_1	TRUE	0.00322979	1367	15	8	0.533333	0.00585223	TF:M02272_1	TF	Factor: RXR:RAR; motif: RGKTCANNNRGAGGTCA; match class: 1	20011	7415
query_1	TRUE	0.00473186	5483	15	13	0.866667	0.00237096	TF:M00751_1	TF	Factor: AML1; motif: TGTGGT; match class: 1	20011	81
query_1	TRUE	0.00473186	5483	15	13	0.866667	0.00237096	TF:M00271_1	TF	Factor: AML1a; motif: TGTGGT; match class: 1	20011	67
query_1	TRUE	0.00473186	5483	15	13	0.866667	0.00237096	TF:M02084_1	TF	Factor: AML1; motif: TGTGGT; match class: 1	20011	79
query_1	TRUE	0.00473551	1438	15	8	0.533333	0.00556328	TF:M07235	TF	Factor: ZEB1; motif: NCWCACCTG	20011	9208
query_1	TRUE	0.00797566	3646	15	11	0.733333	0.003017	TF:M12707_1	TF	Factor: ZNF462; motif: YYYYCTSCWG; match class: 1	20011	10351
query_1	TRUE	0.00824518	1056	15	7	0.466667	0.00662879	TF:M08019_1	TF	Factor: RARA; motif: AGGTCANNYAAAGGTCA; match class: 1	20011	7055
query_1	TRUE	0.0106928	383	15	5	0.333333	0.0130548	TF:M10140	TF	Factor: ZNF322A; motif: GNGCCTGSTACWSWGCCTGN	20011	9956
query_1	TRUE	0.0124754	4786	15	12	0.8	0.00250731	TF:M00412	TF	Factor: AREB6; motif: NNYNYACCTGWVT	20011	182
query_1	TRUE	0.0300437	901	14	6	0.428571	0.00665927	TF:M04754_1	TF	Factor: Pax-5; motif: GTYAYGCTTSRCTGVNYN; match class: 1	20011	6391
query_1	TRUE	0.0317832	1296	15	7	0.466667	0.00540123	TF:M12674	TF	Factor: TCF4; motif: NNCTTTGATSTN	20011	8378
query_1	TRUE	0.0477943	249	15	4	0.266667	0.0160643	TF:M09604_1	TF	Factor: ehf; motif: NRANNAGGAARNRRNNN; match class: 1	20011	1679
query_1	TRUE	0.049798	14	12	2	0.166667	0.142857	TF:M12214	TF	Factor: GLIS1; motif: KACCCCCCACNRWGC	20011	3214

## Sheet: GO_SB vs iSB_UP DEGs
query	significant	p_value	term_size	query_size	intersection_size	precision	recall	term_id	source	term_name	effective_domain_size	source_order
query_1	TRUE	0.000822615	31	12	3	0.25	0.0967742	GO:0051085	GO:BP	chaperone cofactor-dependent protein refolding	21110	14242
query_1	TRUE	0.00109334	138	12	4	0.333333	0.0289855	GO:0006986	GO:BP	response to unfolded protein	21110	2666
query_1	TRUE	0.00130458	36	12	3	0.25	0.0833333	GO:0051084	GO:BP	'de novo' post-translational protein folding	21110	14241
query_1	TRUE	0.00180291	40	12	3	0.25	0.075	GO:0006458	GO:BP	'de novo' protein folding	21110	2255
query_1	TRUE	0.00197445	160	12	4	0.333333	0.025	GO:0035966	GO:BP	response to topologically incorrect protein	21110	9877
query_1	TRUE	0.00700186	220	12	4	0.333333	0.0181818	GO:0006457	GO:BP	protein folding	21110	2254
query_1	TRUE	0.00719332	63	12	3	0.25	0.047619	GO:0034605	GO:BP	cellular response to heat	21110	9145
query_1	TRUE	0.0098935	70	12	3	0.25	0.0428571	GO:0061077	GO:BP	chaperone-mediated protein folding	21110	16064
query_1	TRUE	0.0280862	99	12	3	0.25	0.030303	GO:0034620	GO:BP	cellular response to unfolded protein	21110	9153
query_1	TRUE	0.039567	111	12	3	0.25	0.027027	GO:0009408	GO:BP	response to heat	21110	3549
query_1	TRUE	0.0487183	119	12	3	0.25	0.0252101	GO:0035967	GO:BP	cellular response to topologically incorrect protein	21110	9878
query_1	TRUE	0.00401379	124	12	3	0.25	0.0241935	GO:1904813	GO:CC	ficolin-1-rich granule lumen	22122	3694
query_1	TRUE	0.00780359	155	12	3	0.25	0.0193548	GO:0005814	GO:CC	centriole	22122	367
query_1	TRUE	0.0129789	184	12	3	0.25	0.0163043	GO:0101002	GO:CC	ficolin-1-rich granule	22122	3392
query_1	TRUE	0.0165057	34	12	2	0.166667	0.0588235	GO:0008180	GO:CC	COP9 signalosome	22122	496
query_1	TRUE	0.0185246	36	12	2	0.166667	0.0555556	GO:0016235	GO:CC	aggresome	22122	729
query_1	TRUE	0.000182661	33	12	3	0.25	0.0909091	GO:0140662	GO:MF	ATP-dependent protein folding chaperone	20195	10730
query_1	TRUE	0.00113535	60	12	3	0.25	0.05	GO:0044183	GO:MF	protein folding chaperone	20195	6033
query_1	TRUE	0.00119322	11	7	2	0.285714	0.181818	GO:0000774	GO:MF	adenyl-nucleotide exchange factor activity	20195	96
query_1	TRUE	0.0204119	44	7	2	0.285714	0.0454545	GO:0060590	GO:MF	ATPase regulator activity	20195	8476
query_1	TRUE	0.0274779	29	12	2	0.166667	0.0689655	GO:0051787	GO:MF	misfolded protein binding	20195	8125
query_1	TRUE	0.000171283	67	12	4	0.333333	0.0597015	REAC:R-HSA-3371453	REAC	Regulation of HSF1-mediated heat shock response	10790	1878
query_1	TRUE	0.000491523	87	12	4	0.333333	0.045977	REAC:R-HSA-3371556	REAC	Cellular response to heat stress	10790	322
query_1	TRUE	0.000174368	219	12	5	0.416667	0.0228311	TF:M11656_1	TF	Factor: HSF1; motif: RGAANRTTCYRGAAN; match class: 1	20011	4145
query_1	TRUE	0.00953869	493	12	5	0.416667	0.010142	TF:M07100_1	TF	Factor: HSF1; motif: NTTCTRGAANNTTCY; match class: 1	20011	4137
query_1	TRUE	0.0170008	250	12	4	0.333333	0.016	TF:M09950_1	TF	Factor: HSF1; motif: NRGAANNTTCYRGAA; match class: 1	20011	4139
query_1	TRUE	0.0183813	255	12	4	0.333333	0.0156863	TF:M01023_1	TF	Factor: HSF1; motif: NTTCTRGAAVNTTCTYM; match class: 1	20011	4153
