# Supplementary material for: Syncytiotrophoblast Markers Are Downregulated in Placentas from Idiopathic Stillbirths
Source: Int J Mol Sci. 2024 May 9;25(10):5180. doi: 10.3390/ijms25105180 (PMC11121380; doi:10.3390/ijms25105180)
Supplement: Supplementary file 1 [file ijms-25-05180-s001.zip › Supplemental Table S4.xlsx]

## Sheet: Supplemental Table S4
LB vs iSB
Cluster	p value adj.
Macrophage-1	3.61e-15
STB	9.37e-15
Macrophage-2	9.15e-12
Monocyte	1.12e-07
Stromal2	1.12e-07
Decidual	3.32e-07
Stromal-3	4.23e-07
Stromal1	0.000575
T-Cell-Activated	0.00678679
Endometrial	0.0193344
B-cell	0.14222
HSC	0.167026
Fibroblast	0.313862
NK-cell	0.313862
EVT	0.478658
LED	0.478658
T-Cell-Resting	0.478658
npiCTB	0.502067
CTB	0.564688
SB vs iSB
Cluster	p value adj.
EVT	4.39e-18
CTB	1.02e-17
HSC	1.91e-13
Decidual	1.07e-08
LED	2.93e-07
Fibroblast	1.35e-05
STB	0.000161
npiCTB	0.000208
Endometrial	0.000438
Stromal-3	0.00942586
T-Cell-Activated	0.0474793
Macrophage-1	0.160997
Stromal1	0.169557
Macrophage-2	0.277447
NK-cell	0.353706
Monocyte	0.631636
T-Cell-Resting	0.976584
B-cell	0.985452
Stromal2	0.985452
