# Supplementary material for: Syncytiotrophoblast Markers Are Downregulated in Placentas from Idiopathic Stillbirths
Source: Int J Mol Sci. 2024 May 9;25(10):5180. doi: 10.3390/ijms25105180 (PMC11121380; doi:10.3390/ijms25105180)
Supplement: Supplementary file 1 [file ijms-25-05180-s001.zip › Supplemental Table S5.xlsx]

## Sheet: normalized_counts_plus_one
	LB1	LB2	LB3	SB 1	SB 2	SB 3	SB 4	SB 5	iSB 1	iSB 2	iSB 3	iSB 4	gene_name	chromosome
ENSG00000000003	4.34405	5.01661	5.21688	3.84846	5.06925	3.38276	3.83133	4.16193	4.31347	4.29291	4.54107	4.56352	TSPAN6	X
ENSG00000000419	5.30808	5.27536	5.28058	5.26323	5.31188	4.98041	5.0609	5.15256	5.31478	5.38741	5.74011	5.33908	DPM1	20
ENSG00000000457	4.07024	4.02338	4.75617	4.63651	4.66846	4.48947	4.96326	4.54089	4.41039	4.93373	4.52381	4.71602	SCYL3	1
ENSG00000000460	2.64757	3.03681	2.94783	3.23661	3.43366	3.02756	3.18506	3.55519	3.43121	2.77997	3.72009	2.83826	C1orf112	1
ENSG00000000938	3.15366	4.13201	2.82027	2.61035	5.69639	6.37416	2.86712	2.67298	4.26245	2.91317	2.20105	2.37607	FGR	1
ENSG00000000971	4.90513	6.25662	6.18631	4.50479	6.38251	6.16123	4.17707	5.71342	6.24491	5.26812	3.36066	4.23622	CFH	1
ENSG00000001036	6.55511	5.74327	6.19919	6.62815	5.77293	6.71063	6.27763	6.55387	6.63081	6.25974	6.22156	6.6257	FUCA2	6
ENSG00000001084	5.20887	4.3576	4.76114	4.86856	4.44453	6.06641	4.42157	4.71978	5.10395	4.30103	4.78507	4.69735	GCLC	6
ENSG00000001167	4.72535	5.21077	5.18024	5.40037	5.02575	5.50944	5.03852	5.12106	5.26381	5.47262	5.80225	5.55153	NFYA	6
ENSG00000001460	1.46224	1.43066	1.81494	1.97682	2.26975	2.633	1.72807	2.67298	2.48687	1.68459	1.85973	1.99074	STPG1	1
ENSG00000001461	4.14372	3.53583	3.54021	4.29563	2.93501	4.99519	3.89502	4.28073	4.27965	4.41024	3.96987	4.01881	NIPAL3	1
ENSG00000001497	6.04327	5.74327	6.10458	5.72332	5.38256	5.48869	6.0164	5.87321	5.42328	5.92316	5.68296	5.22376	LAS1L	X
ENSG00000001561	2.83669	2.9603	1.92534	3.21693	1.41246	4.10934	1.48485	2.98438	3.46169	2.41095	3.15189	2.43135	ENPP4	6
ENSG00000001617	7.70743	6.80824	7.22934	6.92194	5.75529	6.08034	6.96423	6.6996	6.19136	6.5116	6.65307	7.48809	SEMA3F	3
ENSG00000001629	5.2427	5.59931	5.54839	5.56504	5.6494	5.66548	5.59733	5.32835	5.74777	5.57669	5.74756	6.02874	ANKIB1	7
ENSG00000001631	3.52759	2.60576	2.72171	2.69811	2.36591	2.4732	2.76173	2.02603	2.03871	2.28551	2.54687	2.2587	KRIT1	7
ENSG00000002016	3.91101	4.81411	4.75118	4.49666	4.50913	4.35838	4.98684	3.81347	3.96558	4.49769	4.91649	4.91663	RAD52	12
ENSG00000002330	5.67321	4.89855	4.75617	5.31966	4.59099	5.09466	4.86491	5.46007	4.82799	5.01007	4.95562	5.06676	BAD	11
ENSG00000002549	5.48813	6.70064	6.70399	6.60185	7.45533	9.0215	8.06611	7.60996	7.94195	7.28143	7.03437	6.41671	LAP3	4
ENSG00000002586	6.76759	7.85823	6.45833	7.01744	8.02564	7.18052	7.29451	7.30117	7.49681	7.64684	7.44971	7.58372	CD99	X
ENSG00000002587	0	1.43066	1.42168	1.1869	1.99691	2.38613	1.72807	2.27531	3.00424	1.58161	1.25332	1.53247	HS3ST1	4
ENSG00000002726	7.4781	7.19801	5.14644	9.33642	7.22792	10.3674	3.85714	7.80594	9.58854	8.87013	7.58271	9.74977	AOC1	7
ENSG00000002834	7.4494	8.62508	7.72658	7.5489	8.05027	8.23125	7.71462	7.38312	7.85709	8.07832	7.7791	7.54977	LASP1	17
ENSG00000002919	4.67667	4.89855	4.45245	4.41267	4.20555	5.4782	4.79985	4.63311	4.60724	4.5868	4.48867	4.15643	SNX11	17
ENSG00000002933	4.77244	6.23242	4.09114	5.16398	5.394	6.98699	6.34303	6.25331	6.57789	6.46535	5.3328	5.72565	TMEM176A	7
ENSG00000003056	6.3685	6.22426	6.40534	6.79501	6.74857	7.15112	6.64482	6.97977	6.62745	6.50458	6.20541	6.55278	M6PR	12
ENSG00000003137	3.41339	4.81411	4.05921	3.4871	4.53003	4.85633	2.02991	0.822287	4.45651	4.00527	3.86416	2.0857	CYP26B1	2
ENSG00000003147	4.51992	4.41606	4.86176	4.08388	3.98103	4.44708	4.6964	4.28073	4.39468	4.39514	3.91798	4.33133	ICA1	7
ENSG00000003393	3.91101	5.27536	5.31141	4.9423	5.0035	4.88836	5.1679	5.15256	5.11358	5.2175	5.14244	5.14602	ALS2	2
ENSG00000003400	3.82428	5.39647	5.29093	5.44333	6.27205	5.62802	6.06705	4.33665	5.61849	5.54966	5.60717	5.65966	CASP10	2
ENSG00000003402	8.0219	8.55689	8.21505	8.06441	8.38462	8.29537	8.07026	7.50405	8.02018	7.85711	7.60647	7.79563	CFLAR	2
ENSG00000003436	8.81216	7.32168	8.61441	9.32671	7.45942	6.60856	6.87387	7.68189	7.05974	7.26179	7.35532	6.79948	TFPI	2
ENSG00000003509	3.99282	3.8645	4.00995	3.45387	3.65917	3.28988	3.70909	2.98438	3.73552	3.36469	3.49068	3.7699	NDUFAF7	2
ENSG00000003756	8.03644	7.79355	8.15636	8.06716	7.41656	7.65102	8.19442	7.37647	7.80307	7.80235	7.87492	8.01093	RBM5	3
ENSG00000003987	2.17336	1.18382	3.06502	2.90897	0.872596	0.722808	1.72807	2.83707	1.38514	1.35058	1.85973	1.53247	MTMR7	8
ENSG00000003989	7.6392	4.65328	7.564	8.11045	4.1925	5.4991	5.67195	6.58883	5.78138	5.41012	5.36707	5.86604	SLC7A2	8
ENSG00000004059	5.27576	5.33718	5.06436	5.17422	5.13213	5.50944	5.12073	5.53369	5.39592	5.25144	5.31787	5.26493	ARF5	7
ENSG00000004139	3.52759	3.90589	3.81338	3.68624	4.26911	4.42541	4.22742	4.16193	4.08785	4.24316	3.43638	3.85997	SARM1	17
ENSG00000004142	6.13621	5.36713	5.5252	5.50141	5.4554	5.64687	5.47346	5.62635	5.71968	5.76472	5.60306	5.78168	POLDIP2	17
ENSG00000004399	8.35147	9.37509	9.1131	8.55291	9.33164	8.18363	8.76203	8.0471	8.75825	8.67211	8.58208	8.61171	PLXND1	3
ENSG00000004455	6.45763	6.51249	6.64873	6.30382	6.31786	6.77631	6.31303	6.6996	6.22728	6.31495	6.33224	6.16545	AK2	1
ENSG00000004468	0	1.43066	0.246775	0.712212	2.26975	5.71097	1.27107	1.34279	2.45693	1.14924	0.352509	0.960807	CD38	4
ENSG00000004478	7.03229	7.43205	6.88111	6.78669	6.82458	6.80176	6.78084	6.8985	6.75903	6.99751	7.70927	7.07952	FKBP4	12
ENSG00000004487	5.54348	6.24859	5.92576	6.09336	6.32086	5.83121	6.34531	6.35159	6.30076	6.53762	7.00825	6.54653	KDM1A	1
ENSG00000004534	7.62002	7.76571	7.68599	7.75819	7.36949	7.514	8.08808	6.97977	7.07707	7.51594	7.32824	7.41511	RBM6	3
ENSG00000004660	2.64757	2.87949	2.65918	2.61035	3.64006	3.77427	3.4956	3.35311	3.40008	3.3491	2.95997	2.99327	CAMKK1	17
ENSG00000004700	4.81804	5.12574	5.25614	5.07935	5.7284	5.95738	5.50238	5.35568	5.66507	5.60322	5.06105	5.31967	RECQL	12
ENSG00000004766	3.82428	4.2652	4.33734	4.44685	4.69647	4.51021	4.5616	4.28073	4.41039	4.42519	4.3778	4.43866	VPS50	7
ENSG00000004776	3.63341	5.32198	3.96756	3.41986	3.90304	5.43548	3.4956	4.8789	6.46584	5.30899	4.77781	5.56189	HSPB6	19
ENSG00000004777	3.52759	3.82189	4.11464	3.07115	3.91898	3.47002	4.35065	3.9631	4.16395	3.91284	4.19367	3.46006	ARHGAP33	19
ENSG00000004779	4.90513	4.52633	4.2481	4.15797	4.43347	4.0254	3.94402	4.16193	3.65869	4.14726	4.12667	4.29204	NDUFAB1	16
ENSG00000004799	6.92175	7.63028	7.35549	7.46382	8.91673	7.70598	9.45595	8.19436	8.98432	9.12254	9.08021	8.7186	PDK4	7
ENSG00000004864	4.86224	5.07221	5.18394	4.87485	5.13895	4.96547	4.95731	4.58774	5.17464	4.94415	5.17043	5.13218	SLC25A13	7
ENSG00000004866	4.90513	4.2652	4.61503	5.40907	4.08358	5.12186	4.5616	5.32835	4.65418	4.65179	4.70313	5.27251	ST7	7
ENSG00000004897	5.69782	6.15729	6.04672	5.7814	5.99218	5.57979	5.7114	5.94693	5.94671	5.69858	5.91574	5.91535	CDC27	17
ENSG00000004939	2.42986	4.2652	2.32506	4.77075	4.80338	1.39286	2.02991	1.34279	4.78646	3.9022	5.14244	4.40223	SLC4A1	17
ENSG00000004961	3.91101	3.98527	3.97614	4.23824	3.93474	4.05393	4.10349	4.33665	4.25377	4.25157	4.27842	4.28706	HCCS	X
ENSG00000004975	5.48813	5.63667	5.50756	5.43484	5.20544	5.40258	5.28664	5.64862	5.19745	5.43987	5.43326	5.31233	DVL2	17
ENSG00000005001	3.28936	2.50162	3.18824	3.27517	3.05526	3.9963	3.93192	3.35311	4.09758	4.61315	4.40633	5.06093	PRSS22	16
ENSG00000005007	7.92102	7.65476	7.63477	7.88437	7.47837	7.53944	7.59987	7.56969	7.60144	7.50894	7.70831	7.70131	UPF1	19
ENSG00000005020	4.14372	4.0967	3.77458	4.66582	5.52994	6.38543	4.83274	4.80153	5.3106	4.81391	4.54962	4.74541	SKAP2	7
ENSG00000005022	7.13495	6.93861	6.91941	7.297	7.33575	7.42398	7.11627	7.66014	7.43959	7.25866	7.75064	7.64103	SLC25A5	X
ENSG00000005059	3.15366	3.03681	3.67274	3.76963	4.15261	5.25067	4.18728	4.84074	4.47157	4.16517	4.21533	3.89972	MCUB	4
ENSG00000005073	4.46365	5.07221	4.60401	3.47058	3.96577	2.77685	4.30449	3.89022	3.94416	4.09212	4.25769	2.85184	HOXA11	7
ENSG00000005075	4.86224	3.73269	3.44457	3.97097	4.16603	4.18867	4.09266	4.91609	4.04823	3.89147	4.23667	3.81217	POLR2J	7
ENSG00000005100	4.62629	4.8779	4.83843	4.70166	4.51962	3.84127	4.30449	4.09865	4.36274	4.58014	4.48867	4.32161	DHX33	17
ENSG00000005108	6.97305	4.20015	6.36509	7.00028	4.45549	5.10832	5.02719	5.12106	5.31895	5.41388	4.53246	6.27278	THSD7A	7
ENSG00000005156	5.69782	4.60383	5.51641	5.8596	4.9029	4.82357	4.87126	5.12106	4.90208	4.67699	4.99372	5.16517	LIG3	17
ENSG00000005175	4.21363	4.83569	4.4401	4.34178	4.47719	4.8069	4.64546	4.49248	4.41818	4.73212	4.56657	4.51743	RPAP3	12
ENSG00000005187	1.86118	1.98823	2.1542	2.02287	1.80441	2.96885	3.24495	2.48781	3.17948	3.45486	4.01996	3.4864	ACSM3	16
ENSG00000005189	1.86118	1.8252	1.31754	1.82914	2.16672	2.29347	2.35381	2.02603	2.26292	1.7807	2.98541	1.99074	REXO5	16
ENSG00000005194	5.48813	5.43938	5.28058	5.52159	5.53512	4.77299	5.12605	5.38249	4.81034	5.30899	5.21948	5.21065	CIAPIN1	16
ENSG00000005206	6.81334	6.03203	6.53144	6.76145	5.86219	6.05939	6.46555	6.31029	5.95208	6.04671	5.91904	6.36559	SPPL2B	19
ENSG00000005238	5.51607	4.44443	5.21688	5.15883	4.6399	4.96547	4.26647	4.03247	4.65418	4.43261	4.62437	4.37898	FAM214B	9
ENSG00000005243	3.00386	2.9603	3.21747	2.80739	3.11183	3.63015	3.51195	4.16193	3.65869	3.84776	3.47281	3.71154	COPZ2	17
ENSG00000005249	5.10232	6.24053	5.4837	5.37397	6.39965	3.33707	5.6936	5.08886	5.82891	5.75883	5.60717	5.16245	PRKAR2B	7
ENSG00000005302	4.67667	4.93899	5.35151	5.26323	5.42782	6.06641	5.31019	4.95234	5.06478	5.34873	5.23547	5.03439	MSL3	X
ENSG00000005339	6.62092	6.99243	7.03679	7.41177	6.88871	6.77631	7.25258	6.6996	7.381	7.20337	7.30065	7.14438	CREBBP	16
ENSG00000005379	3.15366	3.73269	3.72455	3.4871	3.54055	4.0254	4.78647	3.64652	3.76025	4.5868	3.80824	3.45117	TSPOAP1	17
ENSG00000005381	0	0.509876	0.246775	1.10364	4.05502	2.19445	2.706	2.67298	2.11739	0.827876	0.872111	1.01006	MPO	17
ENSG00000005436	3.99282	4.0967	4.49484	4.68743	4.46638	3.70401	4.56943	4.22255	4.27108	4.38753	4.28867	4.40683	GCFC2	2
ENSG00000005448	0	3.03681	2.27032	2.19363	2.69695	2.84373	2.45869	2.48781	2.80474	2.44068	2.8535	2.01507	WDR54	2
ENSG00000005469	4.40509	5.35223	5.07638	5.70578	5.48782	5.62802	6.34759	5.892	5.12314	6.31094	5.80583	6.46719	CROT	7
ENSG00000005483	6.13621	6.66492	6.50204	6.7716	6.75525	6.93042	6.7398	6.28208	6.79089	6.71383	7.11436	6.5434	KMT2E	7
ENSG00000005486	6.20648	5.33718	5.68544	6.29915	5.24391	5.26294	4.93324	5.53369	5.14208	4.9285	5.08478	5.20008	RHBDD2	7
ENSG00000005513	1.46224	2.87949	1.81494	0.328062	2.4991	0.722808	2.706	2.27531	1.18049	2.95497	2.58064	2.13093	SOX8	16
ENSG00000005700	4.51992	5.27536	5.29437	5.27755	5.7102	5.34603	5.29138	5.46007	5.60149	5.29685	5.38629	5.58848	IBTK	6
ENSG00000005801	3.99282	4.0967	4.45245	4.1886	4.34185	4.66617	4.39538	3.45768	4.35464	3.72024	4.1152	4.08926	ZNF195	11
ENSG00000005810	5.48813	5.96508	5.90794	6.12537	5.91481	6.47253	6.00201	6.17878	6.15918	6.08015	5.81649	6.13247	MYCBP2	13
ENSG00000005812	6.11809	6.05061	5.98219	6.28976	5.99969	5.89567	5.98162	6.01706	6.08037	6.10124	5.93218	5.97393	FBXL3	13
ENSG00000005844	2.64757	3.68594	3.26023	4.42129	5.78603	7.6947	5.40511	4.49248	4.88532	5.16057	4.22604	3.98225	ITGAL	16
ENSG00000005882	4.51992	5.24343	5.12346	4.77075	4.733	4.31189	5.31485	5.35568	5.08938	5.40636	5.21948	5.32698	PDK2	17
ENSG00000005884	7.61357	7.6848	7.59147	7.55772	6.8414	6.10099	5.96984	6.61167	6.56917	6.60973	6.28694	5.98936	ITGA3	17
ENSG00000005889	5.48813	6.14004	6.14507	6.46677	5.78168	6.1146	6.66323	6.37848	6.44311	6.55472	6.93345	6.559	ZFX	X
ENSG00000005893	7.30474	6.58436	7.0099	7.40852	7.053	7.36259	6.85798	7.16106	7.14788	6.9019	6.78203	7.07374	LAMP2	X
ENSG00000005961	2.17336	2.26764	2.52533	2.02287	3.11183	0.982281	2.0746	2.27531	2.48687	2.03572	3.19613	2.06254	ITGA2B	17
ENSG00000005981	0	2.9603	1.99452	0.820467	0.997939	2.70671	2.76173	2.48781	1.9555	1.82646	3.0104	3.20902	ASB4	7
ENSG00000006007	5.85921	5.8102	5.8106	6.11212	5.66838	6.2807	5.81051	6.74164	6.18681	6.00503	6.12187	6.26265	GDE1	16
ENSG00000006015	4.90513	4.81411	4.29684	4.1161	4.34185	5.28717	4.44729	4.8789	4.64756	4.48348	4.28867	4.10067	REX1BD	19
ENSG00000006016	3.91101	3.36827	1.85269	1.88007	3.19272	4.18867	1.671	4.28073	3.94416	3.25184	2.90772	2.17479	CRLF1	19
ENSG00000006025	3.52759	4.49955	4.33734	3.25602	3.87063	3.70401	4.14599	3.35311	3.77246	3.52592	3.45471	3.61136	OSBPL7	17
ENSG00000006042	3.732	3.53583	3.65148	3.61286	3.65917	4.40341	4.75249	5.12106	4.35464	4.34099	4.27842	4.35058	TMEM98	17
ENSG00000006062	3.99282	4.49955	4.00995	3.95917	4.45549	5.06693	4.26647	3.73241	4.07804	4.25157	3.85038	3.90624	MAP3K14	17
ENSG00000006071	2.64757	1.8252	1.51879	0	0.221804	0	1.10864	0	1.6725	0.151501	0.186995	0.745022	ABCC8	11
ENSG00000006118	7.97738	6.51917	7.51702	8.03311	6.24702	6.72401	6.59199	6.8222	6.51571	6.70161	6.93181	7.28671	TMEM132A	11
ENSG00000006125	7.19668	7.82085	7.2735	7.19259	7.80002	7.04853	7.36255	7.27993	7.64608	7.5203	7.50461	7.38742	AP2B1	17
ENSG00000006194	5.51607	5.41091	5.24908	5.42201	5.12528	5.13527	5.49006	5.21357	5.16541	5.34087	5.28752	5.04329	ZNF263	16
ENSG00000006210	4.28031	3.94613	3.09682	4.1161	6.35348	0.722808	1.27107	2.27531	3.26836	3.77961	3.15189	1.53247	CX3CL1	16
ENSG00000006282	5.62271	5.35223	4.37674	3.87381	4.66846	4.88836	5.30081	5.50957	5.4577	5.33692	5.57402	5.43011	SPATA20	17
ENSG00000006283	2.42986	2.60576	1.31754	0.467789	1.31945	1.39286	1.27107	0	2.94076	0.997486	1.41179	2.79676	CACNA1G	17
ENSG00000006327	6.54159	4.76996	5.97365	6.128	5.04039	4.5903	3.16454	5.64862	4.9566	4.55318	5.30782	5.176	TNFRSF12A	16
ENSG00000006377	3.732	3.24467	3.43215	4.17846	2.90332	3.77427	4.02595	4.67709	3.31918	3.76793	4.4435	4.08926	DLX6	7
ENSG00000006432	4.07024	1.98823	3.8697	4.62908	2.45606	2.70671	2.38962	2.98438	2.82831	2.84811	2.88087	3.42417	MAP3K9	14
ENSG00000006451	4.94679	5.96508	5.3679	5.35159	5.85393	5.41363	5.28188	5.08886	5.2288	5.46901	5.3719	5.34868	RALA	7
ENSG00000006453	5.27576	5.14315	4.83843	4.84312	4.51962	3.93627	3.93192	4.16193	5.25514	4.49769	4.83489	4.41142	BAIAP2L1	7
ENSG00000006459	5.79224	5.97484	5.9928	5.74751	5.51429	4.82357	4.95133	5.15256	5.35592	5.25563	5.70226	5.8526	KDM7A	7
ENSG00000006468	3.00386	3.63761	2.65918	2.45107	3.56101	2.29347	2.81539	0.822287	2.51621	2.84811	2.93408	1.80785	ETV1	7
ENSG00000006530	4.21363	4.52633	4.18291	4.48847	4.51962	4.79004	4.58496	4.49248	4.44893	4.19164	4.40633	4.62805	AGK	7
ENSG00000006534	4.67667	4.97832	4.54182	4.63651	4.54037	6.00198	5.46509	5.71342	5.74468	5.50111	4.60809	5.4119	ALDH3B1	11
ENSG00000006576	4.86224	4.29666	5.13116	5.13806	4.67786	5.17477	4.76618	4.84074	5.11358	4.87506	4.67214	5.01341	PHTF2	7
ENSG00000006607	5.57038	5.25948	5.31141	5.24877	4.98847	5.03866	4.90877	4.80153	5.02961	5.03465	5.18697	5.16245	FARP2	2
ENSG00000006625	2.42986	2.26764	2.09243	1.6646	2.96603	2.84373	2.27939	1.72448	2.36319	2.11161	3.52577	2.64911	GGCT	7
ENSG00000006634	0.908952	2.79389	2.87632	2.93328	3.43366	3.9963	3.32112	3.24036	3.54943	2.87012	4.22604	3.30094	DBF4	7
ENSG00000006638	3.28936	4.57846	3.97614	2.85907	4.09765	2.96885	2.9414	2.98438	3.47669	2.75652	3.10625	3.01756	TBXA2R	19
ENSG00000006652	2.17336	3.8645	3.24612	3.75606	3.95034	4.48947	3.57552	4.54089	4.56576	4.48348	6.57773	5.97548	IFRD1	7
ENSG00000006659	7.21384	1.8252	7.02237	6.5159	0.997939	2.84373	2.16004	4.09865	1.18049	2.11161	1.41179	1.80785	LGALS14	19
ENSG00000006695	3.82428	4.20015	3.87888	4.0172	3.93474	3.47002	4.02595	3.9631	4.03816	4.25993	3.67391	4.33617	COX10	17
ENSG00000006704	3.99282	4.49955	3.77458	3.71457	4.41111	4.0254	4.42157	4.58774	5.14678	4.83645	3.86416	3.83968	GTF2IRD1	7
ENSG00000006712	6.54159	5.95526	6.0406	6.19238	5.79469	6.28672	5.72197	5.83489	6.06804	6.03944	6.45566	5.81671	PAF1	19
ENSG00000006715	5.3397	5.77712	5.96936	5.93379	5.8033	5.8476	6.26804	6.194	5.9085	5.72902	5.92891	5.96146	VPS41	7
ENSG00000006740	5.20887	5.50819	5.86471	4.58372	6.28748	2.633	5.26269	4.84074	4.84543	5.27226	5.26173	4.56352	ARHGAP44	17
ENSG00000006744	6.30585	6.32687	6.02622	6.11743	6.10794	5.9422	6.19654	6.23871	6.04306	6.14253	5.91904	5.99702	ELAC2	17
ENSG00000006747	6.72033	6.0598	6.57443	6.6113	6.09045	6.79755	7.96068	7.20679	6.93496	6.42129	5.56982	7.22286	SCIN	7
ENSG00000006756	6.04327	5.63667	5.97151	6.01007	5.21192	5.69294	5.58965	5.71342	5.91952	5.81382	5.66733	5.54736	ARSD	X
ENSG00000006757	2.17336	1.98823	2.50177	2.45107	2.26975	2.96885	3.14371	2.98438	3.00424	2.73269	2.70832	2.83826	PNPLA4	X
ENSG00000006788	1.86118	2.70289	1.99452	3.56698	2.11231	1.20212	2.35381	0.822287	2.33053	2.91317	1.80365	1.35321	MYH13	17
ENSG00000006831	5.37063	6.47172	5.99068	5.80465	6.08693	5.6562	5.55852	5.79552	6.13811	5.67689	5.97725	5.98167	ADIPOR2	12
ENSG00000007047	4.90513	5.49469	5.01943	4.67306	5.29366	5.02432	5.22354	5.05592	5.3106	5.43249	5.11965	5.10693	MARK4	19
ENSG00000007062	5.20887	6.05061	5.5252	5.67727	6.07275	5.89567	6.18385	6.08394	6.56215	6.58665	4.97479	4.60419	PROM1	4
ENSG00000007080	6.17177	6.07802	5.47465	5.58819	5.75529	5.62802	5.31485	6.28208	5.46148	5.58004	5.54438	5.22376	CCDC124	19
ENSG00000007129	0.908952	2.87949	2.52533	1.54347	2.62104	3.1906	2.35381	2.48781	2.65454	2.28551	1.91372	1.83544	CEACAM21	19
ENSG00000007168	7.25587	7.15575	7.47906	7.63295	7.24383	7.13785	7.31328	7.19927	7.42323	7.24398	7.15555	7.4265	PAFAH1B1	17
ENSG00000007171	0.908952	0.885851	0	1.1869	0.583589	3.13827	0.329964	0	1.50703	2.46981	1.33473	2.19623	NOS2	17
ENSG00000007202	7.72549	7.79079	7.6516	7.39983	7.1269	7.29249	7.2731	7.2365	7.14788	7.09421	7.2132	7.56736	KIAA0100	17
ENSG00000007237	6.06234	6.37187	5.87163	6.25159	6.52209	6.87153	6.82566	6.90776	6.74051	6.76467	5.77699	6.62866	GAS7	17
ENSG00000007255	3.99282	2.87949	3.93274	3.67186	3.05526	4.0254	3.9797	4.33665	3.77246	3.94431	3.98256	3.71154	TRAPPC6A	19
ENSG00000007264	0	1.43066	0.804224	1.01529	2.36591	3.66756	1.3459	0.822287	2.60079	2.11161	0.758686	1.27477	MATK	19
ENSG00000007341	4.51992	4.32745	4.10685	3.47058	3.8206	3.51175	3.83133	4.03247	3.69762	3.76793	3.32125	3.6351	ST7L	1
ENSG00000007376	4.21363	4.02338	3.72455	3.67186	3.5198	3.9666	3.73716	4.03247	3.65869	3.64562	3.36066	3.49508	RPUSD1	16
ENSG00000007384	7.41272	6.71235	7.05714	7.23844	6.65651	5.457	6.46555	6.40488	6.17536	6.44349	6.41178	6.3549	RHBDF1	16
ENSG00000007392	6.68385	6.64672	6.70528	6.84713	6.31183	6.32819	6.75189	6.25331	6.14986	6.45991	6.09875	6.53711	LUC7L	16
ENSG00000007402	3.15366	3.77798	2.63771	3.00386	3.6207	2.77685	4.5616	3.81347	1.91202	4.36445	3.36066	3.0995	CACNA2D2	3
ENSG00000007516	3.732	4.67738	4.28308	3.53556	4.41111	0.982281	4.15642	3.35311	3.99713	4.50474	5.03083	4.38833	BAIAP3	16
ENSG00000007520	5.64818	5.35223	4.97733	4.72969	5.04039	4.87244	4.44729	4.84074	4.70601	4.87506	4.91649	4.43416	TSR3	16
ENSG00000007541	5.06498	4.93899	4.86638	5.0351	4.63025	4.40341	4.80649	4.91609	4.41039	4.37987	4.25769	4.42056	PIGQ	16
ENSG00000007545	5.13872	5.27536	5.08433	5.0902	4.98847	4.42541	5.26751	4.84074	4.83964	4.90736	5.03083	5.18943	CRAMP1	16
ENSG00000007866	8.39726	7.08993	7.8915	8.5921	6.44713	6.82263	7.37824	7.11384	6.95385	7.18373	7.11148	7.51126	TEAD3	6
ENSG00000007908	0.908952	1.43066	2.78165	3.86119	4.70569	0	1.19214	1.34279	3.71036	4.37987	5.26173	1.72177	SELE	1
ENSG00000007923	5.85921	6.39386	6.18075	6.34971	6.15244	5.72877	6.22656	5.94693	5.95208	6.02724	6.03928	6.19104	DNAJC11	1
ENSG00000007944	7.96729	7.65476	7.73419	8.12174	7.0745	6.20641	7.22187	7.00587	6.83811	7.42033	8.0258	8.03567	MYLIP	6
ENSG00000007968	2.83669	2.38937	2.61593	3.17676	3.43366	3.38276	1.83585	3.81347	3.95491	2.97543	4.47975	2.66457	E2F2	1
ENSG00000008018	7.02258	6.4786	6.53144	6.85192	6.25017	6.44048	6.13192	6.50589	6.22284	6.4063	6.43273	6.27151	PSMB1	6
ENSG00000008056	1.86118	2.50162	2.42867	1.10364	1.99691	1.20212	1.10864	0.822287	1.56432	1.35058	0.872111	0.745022	SYN1	X
ENSG00000008083	4.86224	5.4673	5.14264	5.36058	5.09753	5.5197	5.96391	5.3005	5.64197	5.5867	5.77334	6.09301	JARID2	6
ENSG00000008086	5.10232	4.74736	4.68471	4.84312	4.41111	4.23923	5.21358	4.54089	5.43868	4.86961	4.94269	5.74214	CDKL5	X
ENSG00000008118	1.46224	2.70289	0.8793	1.54347	0.735317	0.406205	0.329964	0.822287	1.9555	0.528968	0.872111	0.420078	CAMK1G	1
ENSG00000008128	0.908952	1.8252	1.31754	1.54347	0.997939	2.08813	1.5496	2.27531	1.72369	0.915172	1.74529	1.69189	CDK11A	1
ENSG00000008130	6.75592	7.02567	6.85809	6.83589	6.58838	7.33088	6.36343	6.6003	6.39457	6.372	6.05137	6.53711	NADK	1
ENSG00000008196	1.46224	0.885851	1.56501	1.01529	1.73408	2.38613	1.83585	1.72448	1.25198	1.47071	2.44055	1.99074	TFAP2B	6
ENSG00000008256	8.24698	7.25918	8.10352	8.56852	6.94428	6.23783	7.16746	7.32901	6.76363	7.03697	6.81077	7.27543	CYTH3	7
ENSG00000008277	0	0.509876	1.51879	1.47886	0.414007	1.84862	1.19214	0.822287	1.32009	0.528968	1.91372	1.9408	ADAM22	7
ENSG00000008282	5.57038	6.10493	6.221	6.16953	6.1956	5.77234	5.73247	5.91054	5.87493	5.95955	6.26634	6.24218	SYPL1	7
ENSG00000008283	6.24037	5.49469	6.03855	6.18481	4.67786	4.98041	5.00427	5.69214	5.30641	5.02487	5.19244	5.15699	CYB561	17
ENSG00000008294	6.50022	6.93861	7.16329	7.2421	6.9751	6.78909	6.80922	6.58883	7.27345	6.88172	7.17641	7.44172	SPAG9	17
ENSG00000008300	0.908952	2.26764	2.61593	1.41122	2.31863	2.4732	1.5496	1.34279	2.68068	1.99623	2.73855	2.76842	CELSR3	3
ENSG00000008311	5.10232	5.66105	5.40331	5.17931	5.54028	4.9197	5.70786	5.40882	5.73847	5.43987	5.52717	5.54945	AASS	7
ENSG00000008323	6.50022	4.57846	5.95642	6.75122	4.38839	4.9197	4.56943	4.67709	4.99877	4.81957	5.30782	5.65386	PLEKHG6	12
ENSG00000008324	2.64757	2.50162	2.61593	2.48436	3.31822	2.96885	2.61816	2.83707	3.10421	2.93423	3.21776	3.11083	SS18L2	3
ENSG00000008382	3.15366	3.90589	3.5745	3.38502	3.49874	4.57069	3.44544	3.45768	3.52077	3.28499	3.56003	3.42417	MPND	19
ENSG00000008405	5.2427	4.0967	5.0883	5.17931	4.733	4.21417	3.86988	4.49248	4.31347	4.51176	4.80663	4.69359	CRY1	12
ENSG00000008441	4.07024	6.05061	5.27712	4.81722	5.54028	5.21322	5.86877	5.77543	5.26381	5.99003	4.99372	5.09271	NFIX	19
ENSG00000008513	7.80691	6.13135	7.23114	7.99102	6.31786	6.8635	6.64296	5.94693	6.5066	6.2639	6.21351	6.54236	ST3GAL1	8
ENSG00000008516	2.17336	3.17865	0.8793	1.34025	3.6207	3.1906	0.329964	2.27531	2.03871	1.95562	1.55457	0.420078	MMP25	16
ENSG00000008517	4.72535	5.48106	3.76471	5.11167	6.26895	6.49351	3.83133	3.9631	5.07467	5.02487	5.50974	3.81217	IL32	16
ENSG00000008710	7.03229	7.77691	7.00885	6.93103	7.20698	6.76772	7.73565	7.35632	6.9034	7.82647	7.09842	7.18583	PKD1	16
ENSG00000008735	3.52759	2.26764	2.72171	2.54873	1.66014	1.84862	1.5496	1.34279	2.54495	1.99623	2.11148	2.2587	MAPK8IP2	22
ENSG00000008838	6.68385	6.49903	6.47658	6.72883	6.39396	6.05939	6.49873	6.4308	6.32168	6.24928	6.53746	6.52234	MED24	17
ENSG00000008853	5.51607	6.40111	5.85312	5.78808	5.394	5.57979	5.83994	5.98242	5.78741	5.75291	5.90245	5.61459	RHOBTB2	8
ENSG00000008869	4.46365	5.36713	5.30462	5.32885	5.10452	5.457	5.41818	4.58774	5.54212	5.3448	5.42863	5.6046	HEATR5B	2
ENSG00000008952	7.95714	7.41781	7.77346	7.94989	7.4333	7.39361	7.28504	7.51015	7.36999	7.28451	7.26085	7.23586	SEC62	3
ENSG00000008988	8.21324	8.26643	7.3912	7.80588	8.22069	8.52922	8.12905	8.81507	8.35095	8.54016	8.3312	8.28896	RPS20	8
ENSG00000009307	8.59686	8.95092	8.94088	9.19432	9.11957	9.06419	8.95068	8.96231	9.05536	9.16156	8.96867	8.99481	CSDE1	1
ENSG00000009335	5.9232	5.83184	6.0928	6.19992	5.91083	6.12808	5.92172	5.99984	6.12151	6.15379	5.98041	6.2396	UBE3C	7
ENSG00000009413	4.46365	5.43938	5.06838	4.79085	5.34175	5.21322	5.24813	5.32835	5.4577	5.31702	5.46072	5.20802	REV3L	6
ENSG00000009780	4.51992	4.60383	4.11464	4.64389	4.32998	4.40341	5.08295	4.49248	4.38676	4.93373	4.59162	4.85056	FAM76A	1
ENSG00000009790	1.86118	1.18382	1.69538	1.97682	3.16626	5.46764	2.67731	3.11804	2.91896	2.25236	1.96576	1.23389	TRAF3IP3	1
ENSG00000009830	4.98727	5.19416	5.60478	5.62224	5.19893	4.55081	4.9393	5.2721	4.94046	5.05881	5.02471	4.94223	POMT2	14
ENSG00000009844	5.17422	5.29107	5.25614	5.52959	5.32988	5.23829	5.14189	5.2721	5.09425	5.38358	5.13678	5.35108	VTA1	6
ENSG00000009954	7.01281	7.1728	7.03371	7.17358	7.00713	7.1211	7.06319	7.30117	7.10025	7.00375	7.10714	6.89681	BAZ1B	7
ENSG00000010017	6.44316	5.63667	6.21919	6.62442	5.74191	5.97985	5.74635	6.03407	5.84056	5.80241	5.78063	5.98012	RANBP9	6
ENSG00000010030	3.41339	2.38937	2.27032	2.88423	3.45568	4.93512	2.86712	3.64652	2.60079	3.4837	3.26005	2.71	ETV7	6
ENSG00000010072	3.91101	4.06051	3.85117	3.88631	3.60108	3.33707	3.83133	3.81347	3.56355	3.65833	3.95707	3.9384	SPRTN	1
ENSG00000010165	5.27576	5.3066	5.10794	5.05739	4.97329	5.09466	4.96326	4.76123	5.01941	4.8913	5.37671	4.95801	EEF1AKNMT	1
ENSG00000010219	0.908952	3.24467	2.98229	2.85907	3.49874	4.85633	3.39346	2.48781	3.35208	3.20063	3.76484	4.31182	DYRK4	12
ENSG00000010244	7.07047	6.57797	7.12234	6.95646	6.71016	6.58432	7.13617	6.48129	6.58482	6.40064	6.80185	6.80298	ZNF207	17
ENSG00000010256	7.39025	6.53904	6.897	6.86935	6.47435	6.99068	6.61298	7.13764	6.75135	6.64048	6.97054	6.88448	UQCRC1	3
ENSG00000010270	4.51992	5.16036	5.0563	4.83669	5.49847	4.85633	5.12073	5.05592	5.281	5.24724	4.92308	5.02244	STARD3NL	7
ENSG00000010278	4.21363	5.73181	4.13009	5.00673	5.36521	5.34603	5.24813	5.77543	5.53139	6.15603	5.75867	5.71083	CD9	12
ENSG00000010292	6.33752	6.11379	6.3304	6.40509	6.53766	6.24403	5.95198	6.7622	6.63916	6.28454	6.79107	6.19371	NCAPD2	12
ENSG00000010295	5.3397	6.20781	5.72414	5.12756	5.62532	6.53963	6.05873	5.94693	5.81423	5.52906	5.32784	4.99211	IFFO1	12
ENSG00000010318	3.52759	3.24467	3.15841	3.38502	2.93501	3.08398	3.80505	3.81347	3.0248	2.97543	2.79717	2.9307	PHF7	3
ENSG00000010319	6.62092	7.1728	6.92717	4.66582	6.75525	3.77427	6.15031	4.8789	5.91677	5.92841	6.01479	5.97238	SEMA3G	3
ENSG00000010322	7.93661	8.38825	7.91623	7.92662	8.07182	7.35973	8.36492	7.83535	8.24652	8.27318	8.33182	8.43165	NISCH	3
ENSG00000010327	8.18741	9.50113	8.57119	9.23401	9.7602	9.50936	10.0163	9.15931	9.62097	9.62615	9.19775	8.88234	STAB1	3
ENSG00000010361	3.732	3.8645	4.09902	4.00578	3.38859	3.55231	4.00301	4.16193	3.64548	3.92341	3.94416	3.9384	FUZ	19
ENSG00000010404	3.99282	3.03681	3.56316	3.33114	2.62104	3.13827	2.45869	2.98438	2.98339	2.80304	2.32576	2.94343	IDS	X
ENSG00000010539	4.98727	3.77798	4.56474	4.96016	3.76877	4.23923	4.2568	4.28073	3.68476	4.02502	4.25769	3.76273	ZNF200	16
ENSG00000010610	5.48813	6.6283	6.16208	6.00147	6.95784	8.60347	7.18412	6.64528	7.43095	6.63245	5.99926	6.97254	CD4	12
ENSG00000010626	3.15366	2.38937	2.57134	1.72156	2.5409	2.77685	3.14371	2.02603	2.48687	3.07357	2.76816	2.46707	LRRC23	12
ENSG00000010671	2.42986	3.36827	3.01595	3.36729	4.45549	5.74636	4.94532	4.39049	4.86836	4.02502	3.05912	3.91273	BTK	X
ENSG00000010704	3.91101	3.90589	3.5745	4.55266	3.78625	4.88836	4.92716	4.49248	4.49386	3.80268	3.76484	4.40223	HFE	6
ENSG00000010803	4.40509	4.74736	4.72597	5.15883	4.76862	4.28807	5.13663	4.91609	5.16541	5.05401	4.76318	5.06093	SCMH1	1
ENSG00000010810	5.67321	5.91528	5.72159	4.98945	6.05122	6.22534	5.26751	5.18339	5.87209	5.92579	5.06702	5.51787	FYN	6
ENSG00000010818	4.28031	5.25948	5.30462	5.23417	5.74638	5.22581	4.64546	4.84074	5.49869	5.01007	5.34268	5.5536	HIVEP2	6
ENSG00000010932	2.42986	1.98823	1.37055	1.72156	2.05576	1.20212	2.67731	3.55519	2.42635	2.9956	1.33473	1.80785	FMO1	1
ENSG00000011007	6.35309	5.90511	5.92132	6.20741	6.03303	5.92685	5.94297	5.92885	6.14986	5.96468	6.30725	6.18569	ELOA	1
ENSG00000011009	6.91127	6.31923	6.02828	6.15151	5.91083	5.83121	5.74635	6.55387	5.79939	5.79092	5.95811	6.11428	LYPLA2	1
ENSG00000011021	5.37063	5.10812	5.35151	5.6297	5.16592	5.42459	5.52268	5.62635	5.46148	5.23457	5.3328	5.30741	CLCN6	1
ENSG00000011028	4.21363	5.41091	5.04819	4.25762	5.71933	5.83943	6.24622	6.40488	5.77533	5.96468	5.86183	7.05186	MRC2	17
ENSG00000011105	7.70136	7.84765	7.64085	7.22496	7.27822	6.58432	7.39705	7.31515	7.51236	7.44987	7.71783	8.07851	TSPAN9	12
ENSG00000011114	5.81491	5.35223	5.75188	6.03276	5.21838	5.54001	5.57806	5.05592	5.34779	5.46901	5.42863	5.8991	BTBD7	14
ENSG00000011132	4.72535	4.38713	4.55905	4.86856	4.32998	4.51021	4.03729	4.16193	4.0075	4.12911	4.10363	4.19421	APBA3	19
ENSG00000011143	2.64757	3.42631	3.96756	3.61286	3.29398	3.08398	4.04854	3.81347	3.73552	3.51198	3.72009	3.68903	MKS1	17
ENSG00000011198	5.59678	4.91891	5.50163	5.78808	4.71485	5.25067	3.95601	4.9877	5.03975	4.72005	4.61626	4.71602	ABHD5	3
ENSG00000011201	0	0.885851	0.552258	1.34025	2.26975	3.70401	1.78297	2.98438	2.19199	1.14924	1.07527	0.856945	ANOS1	X
ENSG00000011243	7.21384	7.01625	7.00047	7.17103	6.71473	6.78484	7.34213	6.6003	6.65903	6.93492	6.85628	6.96319	AKAP8L	19
ENSG00000011258	4.81804	5.17736	5.12732	5.5415	4.87049	4.87244	5.28664	4.95234	5.08938	5.22178	5.38629	5.42103	MBTD1	17
ENSG00000011260	5.51607	5.36713	5.4254	6.0798	5.51953	5.90353	5.57417	5.81534	5.66834	5.39122	5.64756	5.5905	UTP18	17
ENSG00000011275	5.54348	6.22426	5.62128	5.64818	6.06203	5.79787	5.94598	5.50957	5.84345	6.03944	5.52717	5.91858	RNF216	7
ENSG00000011295	5.02665	5.76593	5.48069	5.01245	5.3997	5.1877	5.44821	5.18339	5.45392	5.13807	5.55291	5.51999	TTC19	17
ENSG00000011304	8.48469	8.27632	8.35273	8.45816	8.31932	7.62511	7.98795	8.27528	8.1155	8.05448	8.33739	8.25233	PTBP1	19
ENSG00000011347	7.40527	6.91346	7.45548	7.88593	6.18905	6.38543	7.81435	7.58709	6.64249	7.18593	7.29303	7.94043	SYT7	11
ENSG00000011376	4.46365	4.89855	4.81949	4.48847	5.0035	4.48947	4.63057	5.35568	4.66731	4.41774	4.53246	4.86736	LARS2	3
ENSG00000011405	5.98448	6.55864	6.27934	6.11212	6.11833	5.57979	6.09443	6.44359	6.43928	6.01988	6.25592	6.72308	PIK3C2A	11
ENSG00000011422	3.00386	4.2652	3.04885	4.22844	6.50636	7.0307	4.23728	5.43467	6.67212	5.29685	5.07296	4.88727	PLAUR	19
ENSG00000011426	2.17336	3.98527	4.41509	4.59138	5.06925	3.9666	3.46235	5.71342	5.09911	4.40271	6.09875	4.27703	ANLN	7
ENSG00000011451	5.83723	6.28042	5.87163	5.78808	6.13889	5.48869	5.89705	5.71342	5.72597	5.81382	5.44705	5.57831	WIZ	19
ENSG00000011454	6.09975	6.34203	6.80853	6.92042	6.06203	6.06641	6.47183	6.31029	6.36867	6.47076	6.05438	6.44944	RABGAP1	9
ENSG00000011465	9.43224	10.2246	9.59962	9.87978	10.8113	11.0698	10.9148	11.3162	11.2219	11.1444	10.3088	10.7669	DCN	12
ENSG00000011478	3.28936	3.48211	3.59691	3.45387	2.11231	3.1906	2.96533	3.55519	3.47669	2.87012	3.17418	3.43323	QPCTL	19
ENSG00000011485	5.45964	5.96508	5.78642	5.6987	5.635	5.4782	5.43542	5.67054	5.75702	5.5867	5.61126	5.36297	PPP5C	19
ENSG00000011523	5.30808	5.38187	5.68282	5.88476	5.42224	4.44708	5.77032	5.02221	5.55984	5.55307	5.54438	5.43237	CEP68	2
ENSG00000011566	5.79224	5.96508	6.44295	6.63187	6.44713	5.32277	6.09985	5.87321	6.15219	6.23662	6.33719	6.48907	MAP4K3	2
ENSG00000011600	5.17422	5.91528	4.35059	4.89356	6.27515	7.91091	5.91252	6.0675	6.48636	6.03457	5.01239	5.47904	TYROBP	19
ENSG00000011638	2.83669	3.24467	2.24215	2.38208	2.5409	3.47002	3.37571	3.11804	3.38426	3.56693	3.50833	3.1662	TMEM159	16
ENSG00000011677	3.99282	1.8252	2.06052	3.07115	2.83775	2.38613	4.07077	2.98438	3.43121	2.82575	3.08288	4.08926	GABRA3	X
ENSG00000012048	3.28936	3.53583	3.48118	3.59773	4.42233	3.90529	2.76173	4.44238	4.2274	3.77961	4.27842	3.38736	BRCA1	17
ENSG00000012061	5.37063	5.14315	5.45944	5.36506	5.48247	5.41363	5.26269	5.21357	5.09425	5.25144	4.82083	5.02843	ERCC1	19
ENSG00000012124	0.908952	1.18382	1.31754	1.47886	2.05576	3.24109	1.93614	2.67298	3.23347	1.99623	1.07527	1.83544	CD22	19
ENSG00000012171	11.332	6.31155	10.6388	11.585	5.96173	6.59891	6.12663	9.59154	6.18224	5.96978	5.57402	6.01974	SEMA3B	3
ENSG00000012174	3.99282	4.20015	5.12732	5.40472	4.43347	4.23923	4.86491	5.02221	4.83383	4.90203	4.96843	4.7011	MBTPS2	X
ENSG00000012211	3.41339	3.77798	4.25516	4.10544	3.67802	3.70401	3.51195	3.45768	3.47669	3.36469	3.43638	3.67383	PRICKLE3	X
ENSG00000012223	2.64757	0.885851	1.08359	2.38208	3.80353	2.29347	3.10114	4.28073	1.25198	2.1837	1.33473	0.182946	LTF	3
ENSG00000012232	5.13872	6.17432	5.50756	5.47266	5.96557	5.21322	5.94297	5.85418	6.08527	6.18046	5.67126	6.10581	EXTL3	8
ENSG00000012660	5.13872	5.75464	5.56554	5.00673	5.70101	5.80627	4.95133	5.35568	5.80831	5.25144	5.18697	5.30495	ELOVL5	6
ENSG00000012779	5.30808	5.72025	5.5046	5.24392	5.8033	7.1934	5.91559	5.91054	5.94401	5.52559	3.60994	4.43416	ALOX5	10
ENSG00000012817	0	6.14004	0	0	6.27824	0	0	0	0	0	0	6.07865	KDM5D	Y
ENSG00000012822	7.6392	7.64868	7.84251	7.83037	7.2359	7.41851	8.00681	7.57552	7.52684	7.45261	7.00514	7.35978	CALCOCO1	12
ENSG00000012963	4.21363	4.23304	4.10685	4.1161	4.25662	4.79004	3.90742	4.44238	4.40256	4.07327	4.32896	4.01881	UBR7	14
ENSG00000012983	5.02665	5.75464	5.4867	5.40037	5.91878	5.05287	5.83345	5.55742	5.67811	6.14479	5.81295	5.80803	MAP4K5	14
ENSG00000013016	5.3397	5.82106	5.33827	5.35609	4.69647	3.77427	5.03852	4.91609	4.77437	4.72005	4.83489	5.20802	EHD3	2
ENSG00000013275	6.42853	6.14869	6.14507	6.45842	6.13549	6.54466	6.17874	6.46884	6.27954	6.29678	6.20541	6.1241	PSMC4	19
ENSG00000013288	5.88086	6.21606	5.73933	6.13063	5.75972	6.46724	6.56484	6.64528	6.39457	6.22599	6.41646	6.64239	MAN2B2	4
ENSG00000013297	0.908952	3.42631	2.61593	1.34025	1.49983	1.39286	1.02001	2.67298	1.10528	1.63402	2.06453	1.05769	CLDN11	3
ENSG00000013306	6.09975	5.88455	5.70363	5.73374	5.8033	6.01655	5.52671	5.99984	5.78138	5.57334	5.74011	5.74941	SLC25A39	17
ENSG00000013364	6.75592	7.37792	6.87653	6.99884	7.51422	8.21239	7.5112	6.99723	7.38696	7.3388	6.98322	7.36453	MVP	16
ENSG00000013374	6.1541	6.33447	6.4946	6.58468	6.37675	7.06264	6.33386	6.13214	6.46396	6.42873	6.10166	6.25373	NUB1	7
ENSG00000013375	5.43058	6.12259	5.92132	6.22722	6.37386	6.50389	6.54512	6.62296	6.79687	6.54277	6.27925	6.68567	PGM3	6
ENSG00000013392	1.86118	3.10948	2.74197	2.41698	2.45606	3.1906	3.24495	3.11804	3.1234	3.09242	2.61363	3.01756	RWDD2A	6
ENSG00000013441	7.49925	7.39981	7.72849	7.9484	7.37528	7.57186	7.70932	7.27993	8.01697	7.77781	8.62519	7.7365	CLK1	2
ENSG00000013503	4.46365	3.82189	4.81472	5.05185	3.99613	3.51175	4.09266	3.55519	4.06817	3.97511	4.13806	4.39761	POLR3B	12
ENSG00000013523	4.14372	4.72441	4.72597	4.72273	4.41111	4.72057	4.90258	4.03247	4.90208	4.51176	4.77051	5.02543	ANGEL1	14
ENSG00000013561	5.57038	5.07221	5.5252	5.49325	5.35938	5.40258	5.46089	4.91609	5.3437	5.42135	4.84882	5.34149	RNF14	5
ENSG00000013563	4.98727	4.85695	5.01943	4.87485	4.84568	5.23829	4.65285	4.95234	5.04479	4.79101	4.3778	4.6554	DNASE1L1	X
ENSG00000013573	3.52759	5.85315	3.95026	4.10544	5.32988	5.00983	5.33336	5.62635	5.69744	3.8254	5.72886	5.20008	DDX11	12
ENSG00000013583	4.72535	4.67738	4.36373	4.95423	4.7861	4.87244	4.64546	5.32835	4.90763	5.11981	4.8898	5.14877	HEBP1	12
ENSG00000013588	0.908952	3.48211	2.06052	5.24877	6.31485	5.80627	3.51195	5.53369	5.79939	5.59002	5.1593	5.6026	GPRC5A	12
ENSG00000013619	0.908952	2.26764	2.52533	2.34631	1.99691	2.38613	3.22526	2.02603	3.23347	2.84811	2.82561	3.43323	MAMLD1	X
ENSG00000013725	0	0.509876	0.641227	0.712212	1.80441	4.99519	1.88687	0	2.94076	1.58161	0.352509	1.1038	CD6	11
ENSG00000013810	5.48813	5.32198	5.43787	5.21446	5.92668	6.21275	5.14189	6.10018	5.94131	5.0492	6.22423	4.83697	TACC3	4
ENSG00000014123	5.2427	5.48106	5.83909	5.9156	5.46086	5.56004	5.70786	5.2721	5.7844	5.36044	5.6555	5.74032	UFL1	6
ENSG00000014138	2.17336	1.43066	1.99452	1.72156	1.80441	1.97334	1.88687	2.48781	1.6725	1.21952	1.62098	1.27477	POLA2	11
ENSG00000014164	5.69782	4.76996	5.27712	5.48916	5.04766	5.46764	5.02719	5.08886	4.92414	4.99513	4.59162	4.78486	ZC3H3	8
ENSG00000014216	7.99734	7.69369	7.73797	8.19144	7.46215	7.90505	8.10366	8.14039	7.90569	8.03634	8.11203	8.30014	CAPN1	11
ENSG00000014257	3.15366	3.17865	4.05112	4.27675	4.04052	3.77427	4.34154	4.49248	4.0075	4.55318	4.4343	4.53856	ACP3	3
ENSG00000014641	6.33752	5.74327	5.79614	5.87224	6.0834	6.52951	5.84317	6.20906	5.92226	5.86679	6.119	6.1463	MDH1	2
ENSG00000014824	5.7458	5.61187	5.83438	5.80794	5.97703	5.02432	5.66466	5.98242	5.79041	5.68312	5.67907	5.94414	SLC30A9	4
ENSG00000014914	5.45964	4.7922	5.4837	5.47266	4.55064	3.42705	4.92716	4.63311	4.25377	4.55997	4.84882	4.70485	MTMR11	1
ENSG00000014919	4.07024	3.68594	4.2481	4.13719	4.01108	4.46843	4.49739	4.28073	4.38676	4.16517	4.61626	4.40223	COX15	10
ENSG00000015133	2.42986	4.41606	3.96756	3.82266	4.72395	4.75572	4.45576	3.45768	4.54456	4.17405	4.92308	4.75627	CCDC88C	14
ENSG00000015153	4.14372	3.8645	3.97614	3.75606	3.87063	4.0254	4.26647	3.89022	4.01779	4.02502	3.82243	4.12323	YAF2	12
ENSG00000015171	6.32177	6.6283	6.50945	6.48745	6.59831	6.05939	6.43159	6.4179	6.32168	6.63727	6.22956	6.36795	ZMYND11	10
ENSG00000015285	4.28031	4.95879	3.99314	4.37766	5.35938	6.66974	5.36968	5.15256	5.36804	5.10131	3.8778	4.44763	WAS	X
ENSG00000015475	3.82428	3.17865	3.01595	3.11433	4.95021	5.00983	3.91972	3.73241	4.10725	3.81409	3.19613	3.29101	BID	22
ENSG00000015479	3.63341	3.10948	2.78165	2.1528	1.93555	1.56129	2.86712	0.822287	2.29712	2.07416	2.24383	2.41316	MATR3	5
ENSG00000015532	4.62629	5.56096	5.2205	5.01245	5.26277	4.82357	5.3195	5.48503	5.04981	5.39881	5.77334	5.47466	XYLT2	17
ENSG00000015568	3.00386	2.87949	1.42168	1.72156	1.11326	0.982281	1.671	1.72448	1.50703	0.915172	2.06453	1.1038	RGPD5	2
ENSG00000015676	5.98448	6.4509	5.99068	6.31079	6.05843	6.03097	6.12131	6.11625	6.17076	6.17163	6.13329	6.09301	NUDCD3	7
ENSG00000016082	2.83669	4.97832	4.06726	4.10544	3.90304	3.66756	5.54667	3.24036	5.02452	4.11995	5.10232	5.58442	ISL1	5
ENSG00000016391	2.17336	2.26764	1.88947	2.19363	1.58221	2.90764	1.78297	3.35311	2.68068	2.34959	2.93408	2.91785	CHDH	3
ENSG00000016864	5.43058	5.3066	5.70621	5.73719	5.31791	5.26294	5.62764	5.64862	5.52779	5.67063	5.42398	5.72933	GLT8D1	3
ENSG00000017260	6.02394	6.65282	6.32369	6.18227	6.70327	6.24403	6.27524	6.05088	6.27096	6.27632	6.35925	6.15591	ATP2C1	3
ENSG00000017427	5.9232	6.47172	5.63217	6.1385	7.07094	6.03813	7.64224	5.892	6.60544	7.24714	7.70736	8.04752	IGF1	12
ENSG00000017797	7.14393	6.82452	6.65141	7.16719	6.86422	6.98699	6.75017	6.72077	6.9034	6.75583	6.80899	6.85277	RALBP1	18
ENSG00000018189	5.59678	6.05061	5.68805	5.51758	5.68712	6.10099	6.01066	5.73439	6.01765	5.74995	5.93218	6.05684	RUFY3	4
ENSG00000018280	3.28936	4.20015	3.20293	3.59773	6.49842	6.98328	3.96791	3.45768	5.77836	4.37987	3.57686	3.5709	SLC11A1	2
ENSG00000018408	6.50022	7.7797	7.08516	6.92498	7.02012	4.72057	6.25596	5.98242	6.76821	6.70007	7.28281	7.6425	WWTR1	3
ENSG00000018510	4.40509	5.38187	5.18024	5.34254	5.71933	5.56004	5.41384	5.79552	5.50236	5.3009	5.1593	5.62055	AGPS	2
ENSG00000018610	5.9232	4.74736	5.19133	5.5728	4.61075	4.96547	4.79985	5.2721	4.78043	4.75597	5.17596	4.32648	STEEP1	X
ENSG00000018625	3.63341	5.39647	2.72171	1.60531	2.65949	0.406205	3.32112	2.83707	1.77313	3.09242	1.74529	1.75103	ATP1A2	1
ENSG00000018699	3.28936	4.0967	3.6299	4.0947	3.98103	3.59176	4.03729	4.54089	4.03816	4.2347	4.19367	4.31182	TTC27	2
ENSG00000018869	2.42986	1.98823	2.35167	2.23334	2.16672	2.55531	2.02991	2.27531	1.77313	1.52723	1.33473	1.69189	ZNF582	19
ENSG00000019102	3.99282	3.68594	4.70032	4.36877	3.60108	0	3.47908	2.02603	2.70636	2.84811	3.37997	3.5037	VSIG2	11
ENSG00000019144	7.33642	8.43848	7.8932	7.48762	8.16581	6.50389	8.28219	7.36978	8.0748	7.92375	7.45541	7.57249	PHLDB1	11
ENSG00000019169	2.17336	0.509876	0.355949	1.6646	4.854	7.94938	2.49203	4.09865	3.33572	2.87012	2.44055	2.98097	MARCO	2
ENSG00000019186	2.42986	3.03681	2.37779	2.5169	3.65917	2.84373	4.10349	3.89022	3.25102	3.68342	3.10625	2.64911	CYP24A1	20
ENSG00000019485	3.732	5.48106	4.55905	4.44685	4.31801	3.47002	4.57721	4.39049	4.37079	4.78523	4.32896	4.39298	PRDM11	11
ENSG00000019549	3.52759	4.16648	4.17548	2.41698	4.58101	3.66756	5.70074	3.64652	3.83199	4.34885	3.82243	3.5208	SNAI2	8
ENSG00000019582	7.39025	8.59535	7.37589	7.26742	9.30763	12.7337	7.93667	9.04646	10.4316	9.3066	6.98322	7.73329	CD74	5
ENSG00000019991	7.17055	9.34531	8.51013	8.84733	9.88943	9.115	9.88852	9.62702	9.14229	9.17406	9.31524	9.16926	HGF	7
ENSG00000019995	5.54348	5.32198	5.63488	5.96361	5.51953	5.32277	5.61256	5.2721	5.7844	5.68933	5.8755	5.83903	ZRANB1	10
ENSG00000020129	4.90513	4.83569	4.84781	4.42986	4.79477	4.64757	4.47256	4.91609	4.50853	4.64542	4.23667	4.50459	NCDN	1
ENSG00000020181	8.10243	8.8485	8.91128	7.54988	8.37743	6.20641	8.34739	8.27528	7.41156	8.05268	7.78183	7.64054	ADGRA2	8
ENSG00000020256	3.15366	3.94613	3.52859	3.59773	3.56101	3.77427	3.84429	3.73241	4.01779	3.44022	3.67391	3.71896	ZFP64	20
ENSG00000020426	3.41339	3.53583	3.34213	3.62784	3.47737	3.24109	3.07938	4.22255	3.1234	3.28499	3.0104	3.17702	MNAT1	14
ENSG00000020577	5.2427	6.15729	5.51346	5.65916	5.75084	5.97985	5.24325	5.92885	5.73847	5.66119	5.01239	5.7476	SAMD4A	14
ENSG00000020633	1.86118	1.64138	0.45744	1.77635	3.47737	5.32277	1.27107	1.72448	4.02801	3.56693	2.11148	1.69189	RUNX3	1
ENSG00000020922	4.67667	5.21077	5.02771	5.21446	5.10452	5.44628	5.90944	5.38249	5.31895	5.62928	5.35248	5.95519	MRE11	11
ENSG00000021300	1.46224	0.885851	0.804224	0.921162	1.11326	1.39286	0.598332	0	1.61943	1.58161	1.55457	1.19181	PLEKHB1	11
ENSG00000021355	5.43058	5.36713	5.39693	5.59583	6.18905	6.81015	5.91559	5.50957	6.10229	6.01988	5.6634	5.68831	SERPINB1	6
ENSG00000021574	4.34405	4.2652	4.05921	4.71574	4.36531	4.0254	4.34154	3.81347	4.28818	4.35667	4.25769	4.78839	SPAST	2
ENSG00000021645	2.83669	3.36827	2.47781	1.72156	2.99639	3.59176	3.44544	3.45768	3.1977	3.18315	2.44055	4.33617	NRXN3	14
ENSG00000021762	4.40509	5.64891	5.23128	4.60658	5.33583	4.42541	4.92716	4.54089	4.79247	4.84759	4.33886	4.20483	OSBPL5	11
ENSG00000021776	4.51992	5.61187	5.51934	5.84686	5.90283	5.46764	6.04476	5.38249	5.94401	5.96468	5.93545	6.41671	AQR	15
ENSG00000021826	5.02665	3.58762	3.6299	2.19363	1.87147	1.56129	2.91706	1.34279	1.91202	1.58161	2.20105	2.43135	CPS1	2
ENSG00000022267	7.04193	6.67094	7.00885	7.83763	6.26272	5.91135	6.77069	7.42886	7.09297	7.71	5.69071	5.89254	FHL1	X
ENSG00000022277	5.81491	5.69686	5.23843	5.62598	5.67778	5.6562	5.45668	5.55742	4.42593	5.54625	5.56561	5.36771	RTF2	20
ENSG00000022556	5.83723	5.35223	6.40693	6.51792	5.82038	5.87982	5.51864	4.8789	6.39062	5.59664	6.27151	6.74051	NLRP2	19
ENSG00000022567	6.79064	5.74327	6.25135	5.38723	4.82045	5.42459	5.79056	5.60374	5.43485	5.41762	5.53149	6.1185	SLC45A4	8
ENSG00000022840	6.90071	7.01625	6.84411	7.1569	7.16916	7.00536	6.90514	7.01447	7.15489	6.97229	7.39382	7.21369	RNF10	12
ENSG00000022976	4.51992	4.23304	4.57607	4.97195	4.11159	4.51021	4.46418	5.12106	4.31347	4.26825	4.18272	4.15095	ZNF839	14
ENSG00000023041	5.54348	5.36713	5.45023	5.35159	5.42224	5.20052	5.45668	5.38249	5.3106	5.32102	5.3719	5.35346	ZDHHC6	10
ENSG00000023171	6.1541	4.13201	5.89443	5.90026	4.17932	5.9422	5.87194	4.9877	5.18837	5.1561	5.19789	5.83903	GRAMD1B	11
ENSG00000023191	7.84596	7.18966	7.2113	7.35215	7.03116	7.66496	7.04646	7.03996	7.25508	7.20446	6.94969	7.0903	RNH1	11
ENSG00000023228	6.00435	5.67309	6.39418	6.66492	6.3417	6.14143	6.32695	6.39174	6.35453	6.29881	6.22956	6.41671	NDUFS1	2
ENSG00000023287	5.81491	5.76593	5.96291	6.27319	6.13889	6.09414	6.24866	5.892	6.32583	6.1605	6.04231	6.26646	RB1CC1	8
ENSG00000023318	6.09975	6.47172	6.87653	7.21632	6.6277	6.65585	6.46555	6.44359	6.28806	6.47436	6.31228	6.53921	ERP44	9
ENSG00000023330	6.73229	6.27253	6.221	6.19992	6.23433	6.77631	6.08354	5.85418	6.23612	6.31295	6.49604	6.7332	ALAS1	3
ENSG00000023445	1.46224	2.79389	2.94783	2.98072	5.4717	6.15466	2.76173	2.83707	4.3788	3.44022	2.95997	2.72482	BIRC3	11
ENSG00000023516	4.07024	4.99759	5.14264	5.05739	4.93461	5.10832	4.68203	4.67709	5.17923	5.1915	4.63244	5.12661	AKAP11	13
ENSG00000023572	2.83669	3.03681	2.91252	2.83346	3.02613	3.33707	3.18506	2.67298	3.40008	3.11103	3.45471	3.1662	GLRX2	1
ENSG00000023608	0.908952	1.43066	1.73634	2.27199	2.83775	2.90764	2.02991	1.34279	2.48687	2.28551	2.8535	2.50192	SNAPC1	14
ENSG00000023697	4.57408	3.98527	4.1903	4.3235	4.6399	4.98041	4.61553	5.35568	5.07959	4.91267	4.66429	4.96739	DERA	12
ENSG00000023734	6.27348	6.47172	6.19184	6.40509	6.59831	6.21906	6.07532	6.56562	6.28167	6.43797	6.47375	6.44721	STRAP	12
ENSG00000023839	3.15366	2.13469	2.83919	2.98072	1.31945	0.982281	1.93614	2.48781	1.50703	1.91384	1.80365	1.83544	ABCC2	10
ENSG00000023892	4.90513	5.10812	5.11572	5.53357	5.52474	6.49871	6.05873	5.87321	6.05561	5.66119	5.36223	5.5136	DEF6	6
ENSG00000023902	5.48813	5.52156	5.0563	5.17931	6.25017	8.22968	5.85603	6.05088	6.12389	5.88582	5.19789	5.00736	PLEKHO1	1
ENSG00000023909	5.02665	4.7922	5.02358	5.02382	4.44453	5.06693	4.79318	5.35568	4.98834	5.10131	4.90986	4.96739	GCLM	1
ENSG00000024048	6.02394	5.72025	5.99912	6.01293	5.83305	6.17428	5.96094	5.83489	6.12865	6.07067	6.01787	6.06415	UBR2	6
ENSG00000024422	7.02258	7.99876	7.34063	6.59615	7.30576	5.89567	6.92511	6.8985	6.99349	7.11625	6.8302	6.66851	EHD2	19
ENSG00000024526	2.17336	2.79389	3.09682	3.00386	4.05502	1.7121	1.5496	3.9631	4.1264	2.82575	4.36816	2.95606	DEPDC1	1
ENSG00000024862	4.77244	4.85695	4.47077	4.60658	4.45549	4.48947	4.68203	4.71978	4.87969	4.76774	5.06702	4.8573	CCDC28A	6
ENSG00000025039	3.00386	3.24467	2.98229	3.17676	3.34206	4.51021	3.81825	3.24036	3.92241	3.44022	3.15189	3.83968	RRAGD	6
ENSG00000025156	3.63341	3.03681	3.55173	3.87381	3.54055	3.33707	3.7647	3.64652	3.52077	3.56693	3.86416	3.77703	HSF2	6
ENSG00000025293	5.17422	5.67309	5.51346	5.82103	5.77293	5.90353	6.17874	5.99984	6.19817	5.88852	5.91574	6.19237	PHF20	20
ENSG00000025423	2.17336	1.18382	1.77618	2.27199	1.80441	1.84862	2.73414	3.35311	3.06505	3.20063	2.24383	2.87861	HSD17B6	12
ENSG00000025434	5.51607	6.24859	5.83673	5.32885	6.37096	6.49351	5.76351	4.58774	5.25948	5.43249	5.26173	5.90236	NR1H3	11
ENSG00000025708	4.14372	5.24343	3.91501	4.31427	6.5273	8.40046	4.73171	4.95234	6.34435	5.1426	4.79229	4.93587	TYMP	22
ENSG00000025770	5.96435	5.4673	5.75935	6.31774	5.72387	5.56995	5.34253	6.03407	5.71019	5.56998	5.93545	5.61857	NCAPH2	22
ENSG00000025772	5.3397	5.82106	5.32826	5.834	5.65892	5.88777	5.88141	6.0675	5.65851	5.96212	6.2027	6.1897	TOMM34	20
ENSG00000025796	7.37508	6.64061	7.24007	7.68669	6.74411	6.8635	6.85478	7.03996	7.03589	6.88443	6.79107	6.87621	SEC63	6
ENSG00000025800	7.2308	6.41551	6.72195	7.00459	6.53249	6.46193	6.61865	6.23871	6.5409	6.37969	6.59229	6.75051	KPNA6	1
ENSG00000026025	10.1595	11.0937	10.3611	10.2941	11.2739	10.2822	9.87417	10.1157	10.6526	10.6266	10.2866	9.7624	VIM	10
ENSG00000026036	2.17336	2.38937	2.21343	3.11433	2.65949	3.13827	2.76173	1.72448	2.65454	2.34959	2.11148	2.66457	RTEL1-TNFRSF6B	20
ENSG00000026103	3.732	3.98527	3.87888	3.61286	4.91884	4.38107	3.79172	4.22255	4.61404	4.37987	3.79392	3.68145	FAS	10
ENSG00000026297	3.15366	4.52633	3.79411	3.79638	4.82045	6.81432	5.41384	4.54089	5.05981	4.61966	4.33886	4.12323	RNASET2	6
ENSG00000026508	6.45763	7.16856	6.52414	6.20242	7.59209	8.69121	6.77578	6.1634	7.7539	6.78074	6.54176	6.60381	CD44	11
ENSG00000026559	6.02394	4.97832	5.26317	4.25762	4.24402	3.55231	4.2568	5.3005	5.04981	4.74409	5.18697	5.4119	KCNG1	20
ENSG00000026652	3.15366	4.13201	4.48886	4.19866	4.6399	5.26294	5.24325	4.8789	5.11358	4.73212	4.68772	5.54945	AGPAT4	6
ENSG00000026751	0	0.885851	0.45744	1.41122	3.26932	7.2438	1.27107	0	2.87435	2.25236	1.07527	0.909811	SLAMF7	1
ENSG00000026950	4.21363	5.79926	5.35151	4.71574	5.2248	6.86752	5.79724	5.46007	5.52057	5.60651	5.25651	5.81844	BTN3A1	6
ENSG00000027001	3.732	3.17865	2.82027	3.13544	2.96603	3.02756	2.91706	1.72448	3.26836	3.39538	3.32125	3.02956	MIPEP	13
ENSG00000027075	5.83723	6.24859	5.99702	5.85006	5.82038	5.17477	5.27711	5.05592	5.38801	5.56324	6.06932	6.01974	PRKCH	14
ENSG00000027697	6.91127	6.34203	7.11847	7.44492	7.17913	7.11434	6.68861	6.53008	6.97248	6.57161	6.09291	6.28783	IFNGR1	6
ENSG00000027847	5.2427	4.47225	4.67947	4.75037	4.23131	4.40341	4.48088	4.16193	4.63425	4.54636	4.33886	4.51316	B4GALT7	5
ENSG00000027869	0	1.18382	0.45744	0.921162	1.93555	4.10934	0.598332	0	2.62791	1.35058	0.758686	0.909811	SH2D2A	1
ENSG00000028116	3.41339	4.41606	4.25516	4.25762	4.55064	4.75572	4.03729	4.58774	4.4413	4.30103	4.19367	4.00065	VRK2	2
ENSG00000028137	6.18923	7.30631	6.50797	6.24917	7.6301	8.11422	6.81417	5.83489	7.41351	6.70926	6.18909	6.33087	TNFRSF1B	1
ENSG00000028203	6.45763	6.53245	6.70528	7.07047	6.49311	6.01655	6.22903	6.1634	6.31126	6.1605	6.11036	6.13247	VEZT	12
ENSG00000028277	4.72535	4.8779	4.73105	4.86224	6.35054	7.37395	6.06428	4.33665	5.58428	5.15161	3.95707	3.87998	POU2F2	19
ENSG00000028310	5.37063	5.91528	5.61305	5.66643	5.61557	5.57979	5.49417	5.53369	5.55984	5.41012	5.40526	5.23416	BRD9	5
ENSG00000028528	7.22234	7.48421	7.40715	7.20013	7.10791	7.28349	7.39925	7.27278	7.13848	7.18812	7.07344	7.08743	SNX1	15
ENSG00000028839	3.41339	3.53583	3.20293	3.21693	3.47737	3.13827	2.86712	3.24036	3.16103	3.39538	3.32125	3.13323	TBPL1	6
ENSG00000029153	3.91101	1.8252	3.91501	4.70872	3.65917	4.31189	1.27107	2.98438	2.96223	3.28499	3.0104	2.81073	ARNTL2	12
ENSG00000029363	7.03229	7.14282	7.15764	7.49479	7.45396	7.22511	7.21689	7.66014	7.44341	7.37197	8.05086	7.7287	BCLAF1	6
ENSG00000029364	5.40091	5.61187	5.8106	5.96656	5.78168	5.38023	5.55458	5.35568	5.86071	5.76177	5.80583	5.92019	SLC39A9	14
ENSG00000029534	2.17336	3.36827	2.1542	3.29407	3.26932	2.38613	2.24069	3.73241	3.2157	2.91317	3.6262	3.56267	ANK1	8
ENSG00000029639	3.28936	2.70289	2.61593	2.19363	2.87091	2.4732	2.706	3.35311	2.78076	2.75652	2.24383	2.51904	TFB1M	6
ENSG00000029725	5.69782	6.45788	6.51682	6.68654	6.56324	6.66513	6.44655	6.4179	6.64083	6.47794	6.38097	6.73411	RABEP1	17
ENSG00000029993	7.67062	6.79178	7.72149	7.94617	6.22154	6.44587	6.0049	6.66725	6.5986	6.70621	7.05103	7.23521	HMGB3	X
ENSG00000030066	6.04327	5.93541	6.20467	6.62629	5.96557	5.91135	6.15552	6.194	5.99439	6.03944	6.28694	6.00159	NUP160	11
ENSG00000030110	3.91101	4.81411	4.23386	3.70047	4.35363	5.1877	3.80505	3.24036	4.04823	3.9022	3.8778	4.22061	BAK1	6
ENSG00000030304	0	0.509876	0.552258	0.595171	1.58221	0.406205	0.598332	2.27531	2.07859	0.734955	0.758686	0.420078	MUSK	9
ENSG00000030419	3.00386	1.64138	3.9239	4.21859	2.65949	4.13627	4.21749	3.11804	3.82028	4.0348	4.01996	4.36958	IKZF2	2
ENSG00000030582	9.65748	8.43495	9.2752	9.70721	8.38319	9.64211	8.80825	8.95786	9.01097	8.59984	8.28138	8.99939	GRN	17
ENSG00000031003	5.48813	5.77712	5.80097	5.74751	5.57591	5.60892	5.92477	5.60374	5.66507	5.79668	5.8755	5.77279	FAM13B	5
ENSG00000031081	4.94679	6.49903	6.08687	5.76455	6.64936	6.05939	5.63139	5.38249	6.24272	5.98751	6.07229	6.16545	ARHGAP31	3
ENSG00000031691	2.64757	2.70289	2.78165	2.5169	2.80382	3.08398	2.20093	3.55519	2.96223	2.65873	3.19613	2.83826	CENPQ	6
ENSG00000031698	7.4494	6.98762	7.047	7.45335	7.1675	7.14781	7.1216	7.51621	7.20979	7.23976	7.14572	7.23002	SARS1	1
ENSG00000031823	6.30585	6.14869	6.07694	6.26363	5.83725	6.01655	5.95497	5.79552	5.80237	5.97487	5.69071	5.77457	RANBP3	19
ENSG00000032219	5.45964	5.68502	5.62401	5.90642	5.70101	6.45125	6.09714	6.17878	6.13102	6.17163	6.19182	5.76025	ARID4A	14
ENSG00000032389	3.15366	4.06051	3.79411	4.00578	4.66846	4.44708	4.05969	3.9631	4.04823	4.11074	4.30896	4.28706	EIPR1	2
ENSG00000032444	6.32177	6.48544	6.09673	6.33381	6.5247	6.77202	6.41648	6.25331	6.29231	6.43981	6.35193	6.39833	PNPLA6	19
ENSG00000032742	3.41339	3.42631	3.8697	3.13544	3.83747	3.13827	3.55989	2.83707	3.65869	3.51198	3.6262	3.70407	IFT88	13
ENSG00000033011	3.99282	4.23304	4.05921	4.0172	4.34185	4.21417	4.02595	4.16193	4.36274	3.99528	3.67391	3.93202	ALG1	16
ENSG00000033030	5.27576	5.25948	5.16531	5.36058	5.12528	5.34603	5.34253	5.18339	5.30641	5.52559	6.01787	5.56395	ZCCHC8	12
ENSG00000033050	2.83669	3.03681	2.72171	2.23334	2.76907	2.55531	2.58764	3.89022	2.85152	2.89181	2.67744	2.83826	ABCF2	7
ENSG00000033100	5.94392	6.41551	6.1317	5.89098	5.87451	5.50944	5.79056	5.53369	5.9085	5.62928	5.02471	5.88926	CHPF2	7
ENSG00000033122	0	0	0.128657	0.820467	1.80441	0.722808	3.03483	1.72448	0.298988	2.68381	0.977264	0.491186	LRRC7	1
ENSG00000033170	5.72201	5.29107	6.31864	6.85351	5.11839	5.70199	5.75324	5.94693	5.45013	5.81665	6.12187	6.20829	FUT8	14
ENSG00000033178	5.48813	5.03538	5.74436	6.09066	5.73742	5.95738	5.5858	5.3005	5.57385	5.43987	5.90578	5.89254	UBA6	4
ENSG00000033327	6.63373	6.25662	6.46596	7.06635	6.70557	6.79755	6.54115	6.81237	7.11591	6.78943	6.68447	6.56931	GAB2	11
ENSG00000033627	6.51414	6.16583	6.95564	7.10433	6.35348	7.04853	6.84836	6.33795	6.60032	6.21097	6.45111	6.60781	ATP6V0A1	17
ENSG00000033800	5.30808	5.56096	5.46858	5.48916	5.50904	5.56995	5.63139	5.3005	5.83765	5.6325	5.6194	5.90724	PIAS1	15
ENSG00000033867	2.17336	3.8645	3.01595	4.30498	4.46638	4.72057	3.77827	4.22255	4.90763	4.41024	3.57686	4.63983	SLC4A7	3
ENSG00000034053	0	1.18382	0.804224	0.595171	2.31863	2.84373	0.598332	0	3.38426	1.63402	0.977264	0.745022	APBA2	15
ENSG00000034152	5.76921	5.84253	5.75686	6.43945	6.32983	5.70199	5.7043	5.85418	6.15453	6.00503	6.26634	6.49124	MAP2K3	17
ENSG00000034510	8.27177	8.28811	6.8685	7.6687	8.55749	10.0206	8.03677	8.46913	8.58003	8.57325	8.77991	8.46294	TMSB10	2
ENSG00000034533	2.83669	2.38937	3.1734	3.38502	2.99639	3.24109	3.16454	2.48781	2.80474	2.97543	2.8535	2.63348	ASTE1	3
ENSG00000034677	4.57408	6.14004	5.85079	6.20242	6.75525	5.98727	6.089	5.53369	6.37068	6.17163	6.69799	6.77654	RNF19A	8
ENSG00000034693	4.21363	3.17865	4.27615	4.08388	3.65917	3.70401	3.751	3.9631	3.26836	3.38011	3.52577	3.86667	PEX3	6
ENSG00000034713	5.81491	5.8637	5.59368	5.69159	5.87042	5.34603	5.43542	5.71342	5.42328	5.63893	5.74756	5.70524	GABARAPL2	16
ENSG00000035115	5.72201	5.33718	5.8899	5.68086	4.97329	5.13527	6.12397	5.99984	5.29376	5.73203	5.6555	6.09871	SH3YL1	2
ENSG00000035141	4.51992	5.14315	5.05225	4.75037	4.61075	4.75572	5.01578	4.67709	4.47157	4.95449	5.10232	4.87735	FAM136A	2
ENSG00000035403	7.89466	8.75108	8.12778	8.00112	8.15239	7.16426	7.70843	7.65465	8.1131	7.96845	8.01117	7.74561	VCL	10
ENSG00000035499	6.45763	3.10948	6.39098	7.33742	3.21871	1.97334	2.20093	4.9877	2.75639	2.60723	2.73855	2.69501	DEPDC1B	5
ENSG00000035664	0	2.13469	1.37055	3.9232	3.8206	2.19445	2.86712	3.35311	3.1234	3.74428	3.50833	3.28101	DAPK2	15
ENSG00000035681	4.62629	5.07221	5.19868	5.1995	5.25022	5.55006	5.54667	5.3005	5.30641	5.55986	5.1593	5.43011	NSMAF	8
ENSG00000035687	4.40509	5.10812	4.9207	4.91203	5.05489	5.14856	5.01578	4.8789	5.17923	5.14711	4.90321	5.07835	ADSS2	1
ENSG00000035862	9.68696	7.23502	9.14387	9.92955	7.55559	8.59136	7.54534	8.13645	8.77351	8.08598	7.08231	8.22944	TIMP2	17
ENSG00000035928	5.20887	5.59931	5.93898	5.92169	5.88266	5.90353	5.7939	5.94693	6.08282	6.08015	6.22156	5.94414	RFC1	4
ENSG00000036054	5.06498	5.73181	5.75686	6.04397	5.99594	5.50944	5.93086	5.91054	6.18453	5.94925	5.93871	5.95047	TBC1D23	3
ENSG00000036257	6.48616	6.12259	6.31864	6.65946	6.33578	5.9724	6.33156	5.99984	6.17995	6.50282	6.36168	6.52128	CUL3	2
ENSG00000036448	2.64757	1.8252	1.56501	0.328062	2.41169	0.722808	0.715855	0	0.298988	0.997486	0.872111	0.420078	MYOM2	8
ENSG00000036530	0.908952	0.509876	0.8793	1.26561	1.80441	0.722808	2.42457	0.822287	1.72369	1.7807	1.80365	1.69189	CYP46A1	14
ENSG00000036549	4.67667	5.14315	5.07638	5.11699	4.94243	4.79004	5.03286	5.05592	5.14678	5.34873	5.24603	5.31967	ZZZ3	1
ENSG00000036672	0	1.64138	1.14573	1.26561	2.26975	2.633	3.28354	1.34279	2.73159	1.73345	3.15189	2.50192	USP2	11
ENSG00000037042	5.06498	4.2652	5.49269	5.01245	4.02588	4.0254	4.68923	3.73241	4.50853	4.5395	4.69545	4.52592	TUBG2	17
ENSG00000037241	3.91101	3.63761	3.24612	3.67186	3.64006	3.33707	3.52811	4.16193	3.78456	3.41048	3.6262	3.53769	RPL26L1	5
ENSG00000037280	9.08822	6.23242	8.48218	8.50707	6.31786	3.13827	5.45668	6.97096	5.45013	5.70472	6.10166	6.07287	FLT4	5
ENSG00000037474	6.24037	6.14869	6.23893	6.27319	6.40814	6.2807	6.27284	6.08394	5.93046	6.40442	6.09875	6.10014	NSUN2	5
ENSG00000037637	5.02665	5.14315	5.39053	5.80465	4.996	5.32277	5.07747	5.50957	5.24203	5.03952	5.03693	5.33183	FBXO42	1
ENSG00000037749	5.2427	5.22719	5.21326	5.84686	5.75529	4.62873	5.51459	5.21357	5.21545	5.40636	5.35248	5.71641	MFAP3	5
ENSG00000037757	6.45763	6.66492	6.59685	5.36952	5.57087	4.53065	5.79724	4.76123	5.11358	5.52212	5.26692	5.02543	MRI1	19
ENSG00000037897	3.732	2.50162	2.40345	2.38208	3.19272	2.29347	2.20093	2.98438	2.29712	2.3806	2.44055	2.2587	METTL1	12
ENSG00000037965	2.42986	2.26764	1.69538	1.72156	1.73408	2.19445	2.20093	3.35311	1.72369	2.41095	2.11148	1.91518	HOXC8	12
ENSG00000038002	3.00386	2.9603	2.83919	2.90897	2.99639	3.77427	3.54409	3.11804	3.41573	3.1294	3.34109	3.67383	AGA	4
ENSG00000038210	4.21363	4.38713	4.4401	4.42129	4.50913	4.35838	4.61553	4.58774	5.06973	4.68322	4.86261	4.85056	PI4K2B	4
ENSG00000038219	7.12592	6.84595	6.96859	7.49886	6.97319	7.41025	7.33296	7.19927	7.14554	7.15375	7.11003	6.98722	BOD1L1	4
ENSG00000038274	4.94679	6.0598	5.72159	5.73374	5.95401	6.72844	6.12928	6.17878	6.10229	6.27426	5.96131	6.00311	MAT2B	5
ENSG00000038295	3.15366	5.03538	4.52438	3.00386	3.6207	2.96885	3.57552	2.98438	3.74794	3.25184	4.70313	4.29701	TLL1	4
ENSG00000038358	5.54348	5.89487	5.79372	5.68445	5.75972	5.4991	5.64256	5.40882	5.55984	5.52212	5.72131	5.73117	EDC4	16
ENSG00000038382	6.67148	6.97795	6.70011	6.72012	6.81822	6.04525	6.50078	6.51804	7.04346	6.6643	6.78927	6.80473	TRIO	5
ENSG00000038427	7.03229	8.50228	8.1157	7.53606	9.17786	8.37949	8.99168	8.53036	8.69632	8.36857	8.65472	8.68416	VCAN	5
ENSG00000038532	6.06234	5.61187	5.54263	5.93077	5.75529	5.40258	5.5427	5.12106	5.7662	5.66749	5.49211	5.79052	CLEC16A	16
ENSG00000038945	2.42986	5.38187	4.10685	4.60658	6.33281	7.8037	5.31485	6.35159	6.8468	5.85304	5.32286	5.52847	MSR1	8
ENSG00000039068	8.01702	7.15575	7.91065	8.70718	7.60323	7.74368	8.29169	8.41171	8.31018	8.17434	8.84257	8.79568	CDH1	16
ENSG00000039123	5.81491	6.05061	5.8624	5.82103	6.0146	5.77234	5.95497	5.91054	5.77229	5.99755	5.85839	5.83562	MTREX	5
ENSG00000039319	5.20887	5.91528	5.94117	5.64082	6.11488	5.73759	6.12131	5.98242	5.97603	5.92316	5.86868	6.23443	ZFYVE16	5
ENSG00000039523	6.87936	7.67884	7.10093	6.73575	7.72382	6.72844	7.03095	6.194	7.09175	7.12772	7.30318	7.0244	RIPOR1	16
ENSG00000039537	1.46224	2.38937	1.51879	1.54347	0.997939	3.33707	2.35381	1.34279	2.80474	1.73345	0.635577	1.80785	C6	5
ENSG00000039560	8.11619	6.80824	8.23126	8.78898	6.56324	6.80596	6.63553	7.1533	6.90755	6.74097	6.25853	6.97719	RAI14	5
ENSG00000039650	5.98448	5.59931	6.0406	6.39637	5.78168	5.56004	5.56637	5.79552	5.55631	5.56324	5.50095	5.06676	PNKP	19
ENSG00000040199	3.28936	3.73269	3.97614	4.1161	4.17932	4.42541	3.90742	3.89022	4.41039	4.11074	4.29885	4.75266	PHLPP2	16
ENSG00000040275	4.14372	3.63761	3.79411	3.75606	4.05502	3.55231	3.42832	3.73241	3.95491	3.83662	4.09197	3.61136	SPDL1	5
ENSG00000040341	4.07024	4.29666	4.51852	4.72969	4.89487	4.57069	4.90258	4.71978	4.78043	4.6326	5.13678	5.03439	STAU2	8
ENSG00000040487	4.72535	3.98527	4.40877	4.72969	3.58118	3.84127	4.16678	4.22255	4.07804	4.12911	3.89132	4.21537	SLC66A1	1
ENSG00000040531	3.732	4.70109	4.28997	4.34178	5.04766	4.77299	4.6964	4.03247	4.68679	4.33309	4.05641	4.27199	CTNS	17
ENSG00000040608	2.17336	1.43066	1.08359	0.820467	0.583589	0.406205	0.925573	1.34279	1.61943	1.58161	1.25332	0.802068	RTN4R	22
ENSG00000040633	5.17422	5.25948	5.28404	5.40472	5.03309	5.1877	5.20858	4.80153	4.98834	5.30495	4.90986	5.09842	PHF23	17
ENSG00000040933	4.77244	5.63667	4.96446	4.88735	5.31188	6.24403	5.38307	5.21357	5.39592	5.42507	5.40526	5.64024	INPP4A	2
ENSG00000041353	2.64757	1.43066	2.1542	1.92925	2.05576	2.4732	2.81539	2.83707	3.52077	2.9956	2.64589	3.04145	RAB27B	18
ENSG00000041357	6.62092	6.24859	6.06693	6.26842	6.2151	6.91105	6.21162	6.44359	6.04809	6.36232	6.2269	6.19237	PSMA4	15
ENSG00000041802	5.45964	5.93541	5.6802	6.30382	6.17252	5.8638	5.89393	5.60374	5.76925	5.99003	6.06932	6.44161	LSG1	3
ENSG00000041880	3.91101	3.8645	3.90606	2.75378	3.5198	4.16271	3.57552	3.24036	3.54943	3.09242	3.0104	2.99327	PARP3	3
ENSG00000041982	0	2.70289	1.42168	3.88631	5.46629	5.41363	1.83585	6.74164	4.66076	4.57345	3.89132	3.1662	TNC	9
ENSG00000041988	4.07024	4.2652	3.75478	3.79638	3.60108	2.84373	3.52811	2.98438	3.57753	3.60682	3.19613	3.54607	THAP3	1
ENSG00000042062	3.00386	3.8645	3.03249	2.54873	4.06937	5.00983	4.05969	2.48781	3.23347	3.14754	2.79717	2.76842	RIPOR3	20
ENSG00000042088	3.52759	3.77798	3.65148	4.1886	3.85414	4.05393	3.8825	4.09865	3.97618	4.07327	4.25769	4.15095	TDP1	14
ENSG00000042286	4.67667	3.68594	3.95026	3.97097	3.67802	4.66617	4.03729	4.09865	4.35464	3.68342	3.82243	3.69657	AIFM2	10
ENSG00000042304	1.86118	1.98823	2.24215	1.77635	3.60108	2.4732	2.84149	3.35311	3.46169	1.7807	2.06453	1.27477	C2orf83	2
ENSG00000042317	0.908952	1.98823	2.42867	2.19363	1.87147	2.4732	2.58764	2.48781	3.08477	2.55382	2.40329	2.46707	SPATA7	14
ENSG00000042429	3.00386	2.70289	2.47781	2.72621	2.26975	2.55531	2.96533	2.98438	2.54495	2.73269	3.10625	2.99327	MED17	11
ENSG00000042445	5.17422	4.29666	4.76114	4.68743	4.56083	4.53065	4.80649	4.91609	5.04981	4.86413	4.63244	4.84378	RETSAT	2
ENSG00000042493	3.732	3.68594	3.14326	3.89872	5.28138	7.58413	4.27607	5.43467	5.34779	5.44354	3.77945	5.21065	CAPG	2
ENSG00000042753	5.3397	5.68502	5.10011	5.35609	6.0476	6.06641	5.58965	6.17878	5.98917	5.75883	5.95167	5.72933	AP2S1	19
ENSG00000042980	1.46224	2.87949	2.32506	1.34025	3.1393	5.14856	4.27607	3.55519	3.56355	3.03511	3.93113	4.01881	ADAM28	8
ENSG00000043039	2.17336	2.60576	2.65918	2.75378	1.73408	2.77685	3.85714	2.98438	2.33053	3.42542	3.82243	3.3686	BARX2	11
ENSG00000043093	5.13872	4.8779	4.89832	4.96016	4.77739	4.60964	4.71769	4.67709	4.82799	4.56672	4.50635	4.84038	DCUN1D1	3
ENSG00000043143	4.94679	5.99416	5.3249	5.56504	5.76414	6.12135	5.76692	5.55742	5.74468	5.90194	5.58238	5.38415	JADE2	5
ENSG00000043462	3.28936	5.48106	4.99009	5.36952	6.83721	7.8037	6.20159	5.48503	6.38268	6.03457	5.27726	5.09842	LCP2	5
ENSG00000043514	3.732	4.02338	4.62051	4.62908	4.15261	3.77427	4.71063	3.9631	4.51581	4.5257	4.47077	4.23103	TRIT1	1
ENSG00000043591	7.20528	7.65779	7.24982	5.67005	6.22154	5.06693	6.45714	5.99984	5.64529	6.17605	6.97054	6.78629	ADRB1	10
ENSG00000044090	6.48616	6.11379	6.32537	6.28976	5.83305	5.72877	6.38355	5.892	5.96011	5.29685	5.8341	6.03321	CUL7	6
ENSG00000044115	8.5771	8.79993	8.61304	8.86797	8.52662	8.17229	8.46274	8.32797	8.53282	8.49792	8.53118	8.56226	CTNNA1	5
ENSG00000044446	6.30585	6.29607	6.45833	6.7096	5.31188	5.92685	6.26804	6.29625	5.86641	5.73803	6.68641	6.50633	PHKA2	X
ENSG00000044459	2.83669	3.30779	3.44457	3.40255	4.32998	4.9197	4.35065	5.02221	4.19149	4.24316	4.04436	3.6351	CNTLN	9
ENSG00000044524	4.86224	5.82106	5.90794	5.14849	6.60571	5.20052	6.40121	6.50589	5.12314	6.43243	5.8341	5.57831	EPHA3	3
ENSG00000044574	10.0705	10.3248	9.50778	10.1638	10.554	9.92341	9.19512	10.1831	10.0788	10.0918	11.7441	10.6774	HSPA5	9
ENSG00000046604	6.72033	5.69686	6.68711	6.98145	6.11833	6.54968	6.44442	6.79251	6.85829	6.9059	6.98164	7.32797	DSG2	18
ENSG00000046647	3.63341	3.36827	3.12795	3.55135	3.16626	3.38276	3.79172	2.98438	3.36826	3.68342	3.37997	3.66616	GEMIN8	X
ENSG00000046651	5.51607	5.3066	5.60754	5.98993	5.28754	6.12135	5.95796	5.69214	5.38404	5.45815	5.23547	5.45922	OFD1	X
ENSG00000046653	0.908952	1.18382	2.21343	2.57987	3.16626	0	2.73414	0.822287	0.428058	2.93423	1.07527	1.1038	GPM6B	X
ENSG00000046889	5.13872	5.99416	5.37115	4.34178	5.92273	2.77685	4.88387	4.9877	4.58665	5.56998	4.38737	3.79822	PREX2	8
ENSG00000047056	5.62271	5.35223	5.16906	5.35609	4.75979	5.46764	5.39634	5.18339	5.03469	5.03465	5.06105	5.40961	WDR37	10
ENSG00000047188	4.51992	4.83569	5.25262	4.98364	5.4717	5.66548	5.32414	4.9877	5.24641	5.15161	5.03693	5.13496	YTHDC2	5
ENSG00000047230	3.82428	4.60383	4.13009	4.1161	4.43347	3.66756	4.01453	4.67709	4.3218	4.15624	4.30896	4.55525	CTPS2	X
ENSG00000047249	4.62629	5.21077	5.15024	5.31041	5.38829	5.91135	5.37862	5.18339	5.39197	5.42135	5.30782	5.73484	ATP6V1H	8
ENSG00000047315	6.24037	6.41551	6.59128	6.93253	6.88262	6.47253	6.71531	6.66725	6.61564	6.62438	6.73032	6.69511	POLR2B	4
ENSG00000047346	4.86224	4.95879	4.96014	5.12229	5.17258	4.60964	5.11539	4.84074	5.13264	5.2175	5.01239	5.08985	FAM214A	15
ENSG00000047365	2.83669	3.58762	3.54021	3.72853	4.04052	5.21322	3.95601	2.48781	4.53026	3.84776	4.03221	3.59531	ARAP2	4
ENSG00000047410	7.25587	7.7113	7.71318	7.72201	7.52468	7.23759	7.51018	7.69799	7.49773	7.48507	7.55325	7.5653	TPR	1
ENSG00000047457	0	2.38937	4.34398	0.595171	1.11326	4.77299	0	0.822287	1.77313	0.734955	2.93408	1.63022	CP	3
ENSG00000047578	4.40509	4.99759	5.19501	5.0956	5.04039	5.03866	5.50646	4.95234	5.02452	5.16503	5.01239	5.15152	KATNIP	16
ENSG00000047579	3.82428	4.41606	4.04298	4.61412	4.67786	5.21322	4.80649	4.28073	4.97256	4.80822	4.74095	4.54275	DTNBP1	6
ENSG00000047617	4.21363	3.17865	4.71577	5.50952	3.54055	2.55531	3.65125	3.64652	3.04507	3.64562	3.79392	3.96986	ANO2	12
ENSG00000047621	4.28031	4.57846	4.55905	4.47197	4.76862	4.62873	4.73867	4.33665	4.73749	4.39514	4.18272	4.67079	C12orf4	12
ENSG00000047634	3.52759	4.3576	3.90606	4.35983	4.57096	4.10934	4.02595	4.44238	4.29666	4.04452	5.18697	4.60017	SCML1	X
ENSG00000047644	6.69612	6.78069	7.03577	7.4204	7.03665	6.02378	6.59391	6.6889	6.70592	6.70467	6.51363	6.70449	WWC3	X
ENSG00000047648	3.99282	4.44443	4.65297	3.75606	4.36531	3.13827	3.80505	3.9631	4.66731	4.14726	3.52577	3.74101	ARHGAP6	X
ENSG00000047849	7.7195	8.58423	8.11035	8.18828	8.64754	7.91286	8.222	8.16376	8.4335	8.45578	8.29797	8.16464	MAP4	3
ENSG00000047932	5.06498	5.61187	5.61854	5.34707	5.32391	5.27511	5.57806	4.84074	5.24641	5.53251	5.43787	5.66544	GOPC	6
ENSG00000048028	2.17336	4.38713	3.31535	3.15625	4.59099	4.13627	4.04854	4.33665	4.1453	4.30103	4.46174	4.39761	USP28	11
ENSG00000048052	2.42986	3.58762	3.3288	4.07298	4.71485	5.6562	4.95133	5.15256	4.64756	5.08258	3.49068	3.35913	HDAC9	7
ENSG00000048140	4.57408	5.38187	4.80512	4.17846	5.2312	4.73825	4.9393	4.22255	4.69963	4.73812	4.19367	4.52592	TSPAN17	5
ENSG00000048162	4.14372	4.02338	3.69369	3.80958	3.85414	3.77427	2.96533	3.89022	3.76025	3.61987	5.12538	3.93202	NOP16	5
ENSG00000048342	3.52759	4.47225	4.5008	4.03977	4.42233	2.633	4.59266	4.8789	3.95491	4.45463	4.7484	4.63983	CC2D2A	4
ENSG00000048392	4.28031	4.70109	4.92956	4.99523	4.95021	5.1877	5.03286	5.18339	5.07467	5.13807	5.17043	5.50718	RRM2B	8
ENSG00000048405	4.57408	4.41606	4.62051	4.92422	4.733	4.40341	4.31384	4.39049	4.72498	4.53262	4.68772	4.69735	ZNF800	7
ENSG00000048471	5.83723	6.0598	5.70879	5.69515	5.15922	5.8476	6.37465	6.194	6.13102	5.89659	5.50095	6.10298	SNX29	16
ENSG00000048544	4.77244	4.89855	4.64223	4.96016	4.9809	4.99519	5.04414	5.08886	4.93504	4.8913	4.82083	5.1787	MRPS10	6
ENSG00000048649	6.83568	6.28826	6.59963	6.86304	6.49577	6.91105	6.79259	6.9621	6.76516	6.77929	6.90874	6.54236	RSF1	11
ENSG00000048707	6.17177	5.96508	6.15455	6.05232	6.11833	6.06641	5.98455	5.99984	6.19817	5.97994	5.71372	6.02425	VPS13D	1
ENSG00000048740	3.732	4.97832	3.66215	4.35083	5.23757	6.57451	5.14713	5.15256	5.84634	5.06837	4.22604	4.9798	CELF2	10
ENSG00000048828	7.87861	7.8503	7.81946	8.02818	7.73173	7.57678	7.61507	7.60996	7.65599	7.71533	7.77181	7.85117	FAM120A	9
ENSG00000048991	3.91101	3.94613	3.94153	3.95917	4.53003	4.68453	4.08176	4.44238	4.26245	4.27651	4.26809	4.25166	R3HDM1	2
ENSG00000049089	3.15366	1.64138	2.59381	1.54347	2.16672	3.24109	2.49203	2.02603	2.85152	2.41095	2.54687	3.1662	COL9A2	1
ENSG00000049130	3.52759	5.59931	4.92956	5.29172	6.1956	3.84127	5.15755	5.12106	5.30221	5.32501	4.99372	5.6126	KITLG	12
ENSG00000049167	3.41339	3.03681	3.66215	3.29407	3.43366	3.08398	3.751	2.98438	3.04507	3.51198	3.34109	3.5208	ERCC8	5
ENSG00000049192	7.14393	3.94613	7.18194	6.16953	3.65917	4.28807	4.68923	5.02221	4.61404	4.38753	4.84882	4.94856	ADAMTS6	5
ENSG00000049239	6.09975	7.22688	6.69233	6.90821	6.84766	7.01265	7.57286	7.40944	7.21985	7.3787	6.76561	7.13885	H6PD	1
ENSG00000049245	6.32177	6.50577	6.50649	6.73229	6.70097	6.54466	6.50894	6.73124	6.65573	6.72747	6.63108	6.68756	VAMP3	1
ENSG00000049246	3.41339	2.13469	3.61899	3.82266	3.05526	3.93627	4.31384	4.09865	4.16395	3.9022	3.93113	4.25166	PER3	1
ENSG00000049283	5.06498	4.41606	4.64761	5.30109	4.13907	4.9197	6.21911	5.53369	4.78646	5.79668	5.09065	5.98321	EPN3	17
ENSG00000049323	7.00297	7.37424	7.14913	8.0204	7.56195	7.34826	7.58643	7.19171	8.4426	7.85297	7.85091	8.56071	LTBP1	2
ENSG00000049449	6.17177	5.50819	5.54839	5.5728	5.87042	5.73759	5.29138	5.85418	5.77229	5.61956	6.13614	6.18301	RCN1	11
ENSG00000049540	7.60709	7.86874	7.35796	6.40291	7.38104	7.44836	7.79278	8.55415	7.5963	7.47792	7.52535	8.02448	ELN	7
ENSG00000049541	4.46365	4.47225	4.77103	4.83023	5.2312	4.79004	4.87126	5.46007	5.04981	4.8913	5.21411	4.8267	RFC2	7
ENSG00000049618	6.28976	6.49903	6.7194	6.84873	6.5299	6.53963	6.99943	6.28208	6.63916	6.59658	6.6351	6.67139	ARID1B	6
ENSG00000049656	5.98448	5.93541	6.10653	6.18227	6.03668	5.91912	5.69001	5.77543	5.925	6.02724	5.86868	6.00311	CLPTM1L	5
ENSG00000049759	5.57038	5.49469	5.53684	5.61098	5.75972	5.34603	5.60497	5.83489	5.96809	5.90728	5.77699	6.2188	NEDD4L	18
ENSG00000049769	3.63341	3.03681	3.11247	2.9572	2.41169	2.70671	2.89231	2.67298	2.82831	2.3806	2.36505	2.76842	PPP1R3F	X
ENSG00000049860	8.12981	7.62719	7.93779	8.77391	7.3012	8.29984	7.40035	7.88777	8.28218	7.95821	8.1728	8.36754	HEXB	5
ENSG00000049883	2.64757	3.36827	3.44457	3.40255	2.5409	3.70401	3.96791	2.83707	3.49153	3.64562	3.77945	3.7699	PTCD2	5
ENSG00000050130	4.28031	5.07221	4.91179	4.70166	4.94243	5.06693	4.94532	4.67709	4.71868	4.99513	5.25128	5.07257	JKAMP	14
ENSG00000050165	5.88086	6.4509	6.05079	5.15367	5.96173	4.51021	5.31019	6.194	5.30641	5.0492	4.88305	4.62805	DKK3	11
ENSG00000050327	4.94679	3.90589	5.23128	5.24877	4.32998	4.18867	4.09266	4.58774	5.38404	4.51875	4.97479	4.88727	ARHGEF5	7
ENSG00000050344	7.62002	7.79355	7.07422	7.46591	7.53764	6.97212	7.35124	8.05128	7.29158	7.59656	7.91187	8.06729	NFE2L3	7
ENSG00000050393	5.17422	4.67738	5.04819	5.10633	4.70569	4.8069	4.90877	4.80153	4.83964	4.86413	4.92965	5.06093	MCUR1	6
ENSG00000050405	6.51414	6.96332	6.87424	7.00171	6.7685	6.93426	6.79427	6.8222	7.43383	7.30889	7.12441	7.04005	LIMA1	12
ENSG00000050426	5.45964	5.27536	5.72668	5.51758	5.07637	5.14856	5.75667	5.64862	5.19745	5.16057	5.03083	5.21853	LETMD1	12
ENSG00000050438	0	1.64138	1.31754	1.77635	1.58221	3.47002	2.61816	1.34279	3.47669	1.73345	1.96576	2.338	SLC4A8	12
ENSG00000050555	8.97199	9.6248	9.35279	8.06096	8.8118	7.78681	8.50825	8.67837	8.23774	8.15486	8.38952	7.72686	LAMC3	9
ENSG00000050748	5.48813	5.05391	5.77663	5.74751	5.7102	5.59928	5.49417	5.92885	5.53855	5.54283	5.51412	5.57831	MAPK9	5
ENSG00000050820	8.11619	8.11362	7.96444	7.78599	7.09569	5.94981	6.66505	6.91696	6.61903	6.82931	6.73407	6.89845	BCAR1	16
ENSG00000051009	5.3397	5.87416	5.74436	5.6297	5.59091	5.29914	5.45245	5.38249	5.17923	5.36044	5.57821	5.68073	FAM160A2	11
ENSG00000051108	6.80204	7.05356	6.97181	7.02877	6.63496	7.28349	6.50078	6.87035	7.48758	6.89923	7.97988	7.23327	HERPUD1	16
ENSG00000051128	4.07024	3.73269	1.99452	3.87381	4.42233	3.63015	4.01453	3.35311	3.59138	4.56672	3.64228	3.84647	HOMER3	19
ENSG00000051180	2.64757	3.48211	3.08101	3.40255	3.45568	2.633	1.98379	3.9631	3.74794	3.01549	4.32896	2.90489	RAD51	15
ENSG00000051341	2.83669	2.79389	2.72171	2.34631	3.54055	3.08398	2.16004	3.45768	3.2157	2.44068	3.83647	2.66457	POLQ	3
ENSG00000051382	5.76921	5.29107	5.42852	5.90948	5.08346	5.93454	5.56637	5.53369	5.77836	5.70472	6.21081	6.24476	PIK3CB	3
ENSG00000051523	5.67321	6.70064	5.39693	5.6987	6.82034	8.11422	6.52915	6.79251	6.80135	6.63567	5.68684	5.9234	CYBA	16
ENSG00000051596	3.41339	4.60383	3.86047	3.64266	4.49856	3.73957	3.59099	3.9631	3.40008	3.59364	4.3778	3.69657	THOC3	5
ENSG00000051620	6.08116	5.25948	5.3841	5.62598	4.08358	5.05287	5.40073	5.50957	5.24203	5.50111	5.5401	5.50718	HEBP2	6
ENSG00000051825	4.34405	4.02338	4.13776	3.97097	4.23131	3.90529	4.03729	4.22255	4.3465	4.11995	4.61626	4.16189	MPHOSPH9	12
ENSG00000052126	5.02665	5.07221	5.53394	5.92775	5.12528	4.46843	5.68281	5.64862	5.27243	5.64213	5.54865	5.49426	PLEKHA5	12
ENSG00000052344	7.54742	5.89487	7.35549	7.64313	5.2248	5.9724	6.30367	6.53008	6.23612	6.31094	6.72844	7.16423	PRSS8	16
ENSG00000052723	4.21363	4.32745	4.67947	4.54479	4.56083	4.60964	4.48916	4.16193	4.46406	4.48348	4.60809	4.83356	SIKE1	1
ENSG00000052749	4.98727	4.93899	4.91179	4.89975	5.34175	5.03866	4.29508	4.67709	4.99357	4.89667	5.42398	5.21591	RRP12	10
ENSG00000052795	5.48813	6.37924	6.24604	5.22926	6.36516	5.35752	5.35164	4.49248	6.10953	5.30899	5.75498	5.57012	FNIP2	4
ENSG00000052802	4.07024	3.68594	3.86047	4.06199	3.85414	4.23923	3.89502	3.45768	3.723	4.20902	4.52381	4.584	MSMO1	4
ENSG00000052841	6.89007	6.71235	6.85345	7.19762	6.65413	6.72401	6.93271	6.48129	6.65903	6.84884	6.79287	6.71289	TTC17	11
ENSG00000053254	5.30808	6.34203	6.01794	5.9986	6.19887	6.56463	6.59007	6.53008	6.16382	6.4851	6.33472	6.84346	FOXN3	14
ENSG00000053371	4.40509	4.49955	4.81949	4.68026	4.45549	4.21417	4.37765	5.38249	4.94586	4.65813	5.12538	4.67079	AKR7A2	1
ENSG00000053372	4.34405	4.95879	4.40877	4.64389	5.10452	4.73825	4.66751	4.09865	4.64756	4.67073	4.28867	4.34099	MRTO4	1
ENSG00000053438	6.1541	7.01625	6.84176	0.467789	3.11183	0	0.174395	1.34279	2.82831	1.21952	4.95562	2.37607	NNAT	20
ENSG00000053501	4.90513	4.60383	4.38964	4.84952	4.71485	4.66617	4.48916	4.76123	4.60041	4.43998	4.49754	4.25166	USE1	19
ENSG00000053747	5.51607	3.30779	5.36464	5.68445	3.49874	6.29272	1.02001	4.67709	7.26591	5.59664	3.91798	5.94414	LAMA3	18
ENSG00000053770	5.06498	4.72441	5.10011	4.75037	4.82045	4.82357	4.96326	4.71978	4.62754	4.68322	4.93619	4.77421	AP5M1	14
ENSG00000053900	5.17422	5.12574	5.15402	5.0407	5.56582	5.00983	5.61635	5.73439	5.36401	5.00511	5.36707	5.1041	ANAPC4	4
ENSG00000053918	3.63341	4.8779	3.94153	4.29563	4.54037	5.13527	5.40511	5.02221	5.0845	4.80822	4.20454	4.44315	KCNQ1	11
ENSG00000054116	5.40091	5.61187	5.84143	5.90334	5.12528	5.62802	5.37416	5.98242	5.13737	5.18713	5.34759	5.32941	TRAPPC3	1
ENSG00000054118	7.72549	7.87657	7.76977	8.06303	7.70555	7.41576	7.62544	7.63805	7.55184	7.49484	7.6647	7.44172	THRAP3	1
ENSG00000054148	4.90513	5.10812	4.26919	4.42129	4.49856	4.68453	4.48916	4.33665	4.41039	4.96476	4.83489	4.416	PHPT1	9
ENSG00000054179	1.86118	0.885851	1.08359	0.173336	0	0.982281	1.72807	0	0.157225	1.68459	1.25332	0.802068	ENTPD2	9
ENSG00000054219	0	1.18382	0.725026	0.467789	1.22004	3.28988	1.27107	1.72448	1.82093	0.827876	0.635577	0.182946	LY75	2
ENSG00000054267	6.63373	6.30383	6.51975	7.19133	6.64936	7.22824	6.83543	6.71023	6.87679	6.87765	6.98479	6.56725	ARID4B	1
ENSG00000054277	5.98448	4.99759	5.2241	5.34707	5.14574	5.16172	5.43542	4.67709	5.60491	5.73503	5.67907	6.1185	OPN3	1
ENSG00000054282	4.46365	5.03538	4.5929	5.01245	5.269	5.64687	5.23835	4.8789	5.11837	5.24303	4.47077	4.70858	SDCCAG8	1
ENSG00000054392	2.83669	2.79389	2.70117	2.6402	2.21915	2.29347	3.14371	3.24036	2.89683	2.60723	2.98541	3.1662	HHAT	1
ENSG00000054523	5.13872	5.56096	5.33827	5.56504	5.75084	5.46764	5.6936	5.60374	6.16614	5.62928	5.96131	6.06415	KIF1B	1
ENSG00000054598	4.28031	3.94613	4.10685	3.65733	3.78625	3.13827	3.46235	4.28073	3.96558	4.55318	5.1537	4.49598	FOXC1	6
ENSG00000054611	4.94679	5.38187	5.56554	5.6185	5.55566	5.85572	5.58193	4.84074	5.31895	5.65169	5.16488	5.42558	TBC1D22A	22
ENSG00000054654	8.08854	7.32168	8.19177	8.2525	7.47028	7.46439	7.88035	8.0884	7.52504	7.85228	7.65185	7.93246	SYNE2	14
ENSG00000054690	6.25702	3.68594	6.75969	7.21384	2.80382	2.96885	2.96533	4.71978	2.57314	2.65873	3.79392	3.96362	PLEKHH1	14
ENSG00000054793	5.06498	5.83184	4.3832	4.31427	5.10452	4.21417	5.08841	4.49248	5.35997	4.56672	4.27842	4.4873	ATP9A	20
ENSG00000054938	2.17336	1.43066	0	1.10364	3.19272	3.93627	1.88687	1.34279	3.61868	0.734955	1.68448	3.89317	CHRDL2	11
ENSG00000054965	5.59678	6.11379	5.66702	5.4768	5.56075	5.91912	5.80389	5.73439	5.71019	5.744	5.88228	5.74941	FAM168A	11
ENSG00000054967	2.83669	4.23304	4.09114	4.55266	5.56075	6.33982	4.95731	4.54089	5.60149	4.85864	5.01239	5.16517	RELT	11
ENSG00000054983	3.91101	4.72441	5.03183	5.14849	5.17258	5.91912	5.15235	5.79552	5.57385	5.09665	4.81375	5.32455	GALC	14
ENSG00000055044	6.00435	5.84253	5.72159	6.17973	6.02569	6.03813	5.80721	6.13214	5.68135	5.93103	6.32976	5.73117	NOP58	2
ENSG00000055070	7.53382	7.44965	7.20766	7.26023	7.2021	7.06264	6.88175	7.22172	6.91032	7.14926	6.95614	7.00783	SZRD1	1
ENSG00000055118	3.00386	2.70289	2.91252	1.82914	3.11183	2.29347	3.63642	3.73241	1.8672	4.06375	3.86416	3.69657	KCNH2	7
ENSG00000055130	5.98448	6.20781	6.37323	6.54775	6.47166	7.04143	6.31769	6.35159	6.40833	6.63727	6.55668	6.59375	CUL1	7
ENSG00000055147	3.99282	4.65328	4.21949	4.50479	4.74198	4.40341	4.75249	4.54089	4.60041	4.68322	4.29885	4.83697	FAM114A2	5
ENSG00000055163	5.30808	5.19416	5.15402	5.64451	5.59091	6.1146	6.2824	5.58077	5.66507	6.08956	6.44882	6.70262	CYFIP2	5
ENSG00000055208	5.43058	6.23242	6.05079	6.35196	6.4361	6.54968	6.48016	6.57727	6.39457	6.47256	6.33472	6.33812	TAB2	6
ENSG00000055211	6.3685	6.01322	6.16396	6.49564	6.03668	5.70199	6.27284	6.29625	6.31752	6.27426	6.35681	6.47159	GINM1	6
ENSG00000055332	5.54348	5.99416	5.81538	5.64451	5.87859	6.35709	5.89705	5.40882	5.94671	5.98751	6.09875	6.08297	EIF2AK2	2
ENSG00000055483	6.56852	6.45788	6.4946	6.50175	5.92668	6.20641	6.54909	6.64528	6.82645	6.5462	6.47823	6.5308	USP36	17
ENSG00000055609	7.66439	6.6283	7.75052	8.29358	6.49044	6.76341	6.79427	7.35632	6.71386	6.74842	6.80185	7.11161	KMT2C	7
ENSG00000055732	4.67667	3.53583	4.35717	3.72853	3.16626	3.90529	4.43876	3.89022	4.3218	3.70807	2.82561	4.34099	MCOLN3	1
ENSG00000055813	3.28936	5.24343	4.38964	2.66944	4.26911	1.84862	4.01453	2.83707	3.0248	3.72024	2.93408	3.3206	CCDC85A	2
ENSG00000055917	7.12592	6.98762	7.30958	7.27339	6.9808	6.96838	7.2695	6.97977	7.20979	7.15488	7.11292	7.43103	PUM2	2
ENSG00000055950	4.67667	4.93899	4.73105	4.62162	4.69647	4.93512	4.62307	4.28073	4.67383	4.67699	4.90986	4.61617	MRPL43	10
ENSG00000056050	3.732	4.23304	3.64073	3.79638	3.88692	4.33532	3.94402	4.33665	3.87791	4.09212	4.46174	3.98225	HPF1	4
ENSG00000056097	6.63373	6.93861	6.80493	6.98582	6.91278	6.47781	6.84513	6.95318	6.75903	6.86126	6.76744	6.79686	ZFR	5
ENSG00000056277	0.908952	2.87949	2.65918	2.5169	2.62104	1.97334	2.61816	2.27531	2.68068	2.52636	2.64589	2.85184	ZNF280C	X
ENSG00000056291	3.15366	2.79389	2.87632	3.9232	2.05576	1.20212	1.93614	3.35311	2.60079	1.58161	1.68448	2.66457	NPFFR2	4
ENSG00000056558	2.64757	3.42631	3.60799	2.90897	4.86227	5.25067	3.94402	3.45768	3.63214	3.79119	3.45471	2.9307	TRAF1	9
ENSG00000056586	5.20887	5.43938	5.70621	5.67366	5.74638	5.29914	5.46089	5.62635	5.81423	5.39122	5.75867	5.83391	RC3H2	9
ENSG00000056972	4.67667	4.47225	4.89832	5.29172	5.04766	3.9963	4.75935	4.84074	5.13264	4.97495	5.1139	5.32698	TRAF3IP2	6
ENSG00000056998	1.46224	1.43066	1.60979	1.10364	1.93555	2.19445	2.42457	2.48781	2.26292	3.3174	2.47686	2.39473	GYG2	X
ENSG00000057019	3.99282	4.2652	4.88926	4.69456	4.6872	4.18867	4.85853	4.67709	4.87404	4.91797	5.10232	5.20008	DCBLD2	3
ENSG00000057252	3.99282	4.81411	4.45245	4.8559	5.52474	6.62291	5.43112	5.32835	6.21392	5.33692	5.13678	5.75484	SOAT1	1
ENSG00000057294	5.62271	5.52156	6.10458	6.94604	5.72387	5.70199	6.05873	5.98242	5.96011	6.25765	6.30977	6.78452	PKP2	12
ENSG00000057608	7.26413	7.65172	7.19486	7.24331	7.80754	7.85931	7.49382	7.91098	7.6176	7.69235	7.48691	7.62086	GDI2	10
ENSG00000057657	0	3.53583	1.81494	4.41267	5.12528	6.31056	2.91706	4.03247	6.40048	4.37987	4.58332	4.17274	PRDM1	6
ENSG00000057663	5.06498	4.72441	4.74617	5.1995	5.03309	5.16172	4.88387	5.02221	5.01427	5.02487	5.14244	5.20538	ATG5	6
ENSG00000057704	4.86224	5.70861	5.55413	4.72969	5.4717	4.28807	4.60795	4.44238	5.21545	4.75597	5.90578	5.56395	TMCC3	12
ENSG00000057757	5.81491	5.54795	5.25966	5.50547	5.04766	5.27511	5.13663	5.43467	5.431	5.46901	5.55291	5.58848	PITHD1	1
ENSG00000057935	5.67321	5.4673	5.93238	6.10945	5.13895	5.06693	5.95198	5.67054	5.6353	5.83915	5.71752	6.0436	MTA3	2
ENSG00000058056	1.86118	3.58762	3.72455	3.74236	3.96577	3.02756	3.57552	3.35311	3.57753	3.64562	3.68947	4.01881	USP13	3
ENSG00000058063	3.99282	4.62877	4.66363	4.81722	4.86227	5.34603	5.0609	5.35568	5.42328	4.90736	5.54438	5.44586	ATP11B	3
ENSG00000058085	4.40509	5.79926	5.12346	5.9156	4.86227	5.46764	4.53785	5.40882	5.60149	5.88582	5.54865	5.37477	LAMC2	1
ENSG00000058091	2.42986	4.44443	3.31535	2.72621	4.15261	4.10934	3.411	3.81347	3.92241	3.81409	3.73516	3.37801	CDK14	7
ENSG00000058262	8.38594	8.3846	8.35766	8.51162	8.3702	8.13773	8.06473	8.23906	8.33766	8.1498	8.15189	8.45574	SEC61A1	3
ENSG00000058272	6.84673	7.38159	7.01407	6.84071	7.10965	6.71956	6.81252	6.77238	6.94982	7.02353	7.26345	6.91955	PPP1R12A	12
ENSG00000058335	1.46224	0	1.60979	2.61035	0.872596	1.39286	0.715855	2.48781	1.38514	2.44068	1.80365	2.13093	RASGRF1	15
ENSG00000058453	6.75592	6.23242	6.14126	5.52959	6.11833	5.73759	5.88141	5.94693	5.34779	5.72298	5.46072	5.52212	CROCC	1
ENSG00000058600	5.40091	5.8637	5.82491	5.60343	5.48247	4.79004	5.53872	5.48503	5.25078	5.2887	5.043	5.28508	POLR3E	16
ENSG00000058668	6.76759	7.58958	7.38558	6.92194	7.22312	7.30144	7.5572	6.98852	7.90985	7.45807	7.49136	8.06109	ATP2B4	1
ENSG00000058729	4.51992	4.67738	4.23386	4.17846	4.21849	3.84127	4.30449	4.39049	4.08785	4.4619	3.98256	4.23103	RIOK2	5
ENSG00000058799	4.81804	4.60383	4.76114	5.44756	5.52994	5.10832	5.23835	4.84074	4.89093	5.20888	5.22483	5.47904	YIPF1	1
ENSG00000058804	3.41339	3.98527	4.30367	4.06199	4.64948	3.84127	3.77827	4.49248	4.19149	4.06375	4.73347	4.25677	NDC1	1
ENSG00000058866	5.13872	5.77712	4.69514	3.59773	5.0035	1.7121	3.35774	2.83707	4.9296	3.45486	3.03497	2.13093	DGKG	3
ENSG00000059122	5.98448	6.18277	5.33494	6.20242	5.54543	5.99464	6.94028	5.46007	5.76315	5.79092	5.40526	6.5826	FLYWCH1	16
ENSG00000059145	6.27348	5.50819	5.97151	6.33381	5.24391	5.23829	6.03631	5.50957	4.98834	5.2598	4.93619	5.15699	UNKL	16
ENSG00000059377	3.732	4.52633	3.71434	4.42986	5.1525	6.00198	5.38307	4.84074	5.28527	5.06837	3.543	4.29701	TBXAS1	7
ENSG00000059378	5.13872	4.76996	4.84312	4.70166	5.32391	6.97957	5.32876	4.80153	5.62524	5.32102	4.7484	5.02543	PARP12	7
ENSG00000059573	6.24037	6.42977	6.38777	6.25642	6.15916	6.26858	6.35892	6.28208	6.34843	6.49044	6.40708	6.71382	ALDH18A1	10
ENSG00000059588	5.81491	5.8637	6.58428	6.21239	5.40536	6.13477	6.3544	5.99984	5.84056	5.80527	5.77699	6.35847	TARBP1	1
ENSG00000059691	4.40509	4.44443	4.19765	4.14762	4.09765	3.87364	4.19742	4.39049	4.20956	4.15624	4.4343	4.36011	GATB	4
ENSG00000059728	6.04327	4.52633	5.81777	6.54578	5.76414	5.38023	4.41289	5.46007	6.18681	5.83636	6.69799	6.14217	MXD1	2
ENSG00000059758	5.17422	6.29607	6.00123	5.75435	6.51162	4.87244	6.04756	5.85418	5.95744	5.93887	6.00238	6.31258	CDK17	12
ENSG00000059769	3.28936	3.58762	3.49318	3.84846	4.02588	3.9666	3.62143	3.45768	3.95491	3.98523	3.82243	4.15643	DNAJC25	9
ENSG00000059804	3.82428	7.21869	6.26541	6.01578	8.40386	8.05017	5.28664	5.87321	8.2891	7.18812	8.9097	8.47011	SLC2A3	12
ENSG00000059915	0	1.98823	2.18412	1.60531	1.11326	1.56129	2.0746	2.67298	1.77313	2.11161	1.55457	1.91518	PSD	10
ENSG00000060069	5.7458	5.05391	5.46554	5.45177	5.19893	5.28717	4.77974	5.3005	4.89093	4.93373	4.84187	5.01038	CTDP1	18
ENSG00000060138	7.39025	7.75159	7.40159	7.81818	8.36512	7.45372	7.24282	7.93834	7.91054	8.08539	8.12425	7.87837	YBX3	12
ENSG00000060140	2.17336	1.18382	2.76194	2.69811	1.11326	1.20212	0.598332	1.72448	1.50703	1.52723	1.25332	0.856945	STYK1	12
ENSG00000060237	6.84673	7.69958	7.44162	7.25059	7.39536	7.66264	7.30276	7.10581	7.60656	7.09771	7.23059	7.40767	WNK1	12
ENSG00000060339	7.30474	6.73549	7.10191	7.2876	6.83301	7.04143	6.99943	7.4732	7.03081	6.9152	6.96255	6.65212	CCAR1	10
ENSG00000060491	7.05151	6.57797	6.29141	6.43093	6.37096	7.1966	6.38355	6.20906	6.47707	6.27426	6.1698	5.80977	OGFR	20
ENSG00000060558	3.63341	3.63761	3.54021	3.9232	4.87866	5.81463	4.57721	4.91609	5.20648	5.03465	3.76484	3.92562	GNA15	19
ENSG00000060642	3.99282	4.02338	3.8697	3.83561	3.85414	3.93627	4.05969	3.64652	3.77246	3.85881	4.10363	4.07775	PIGV	1
ENSG00000060656	6.33752	6.18277	6.00333	6.73921	6.10097	6.09414	6.55698	6.88918	6.47146	6.71991	6.51363	6.80734	PTPRU	1
ENSG00000060688	4.28031	4.65328	4.76609	4.78418	4.9109	4.75572	4.73171	5.2721	4.63425	4.92324	4.59162	4.84378	SNRNP40	1
ENSG00000060718	5.10232	6.45788	4.75118	5.40037	4.87049	6.3798	6.62805	6.25331	7.58855	5.69551	3.70486	6.16409	COL11A1	1
ENSG00000060749	3.732	4.2652	4.17548	4.48025	4.91884	4.87244	4.7456	5.05592	5.03469	4.90203	5.13678	5.22897	QSER1	11
ENSG00000060762	2.83669	4.23304	3.35534	3.93529	3.80353	4.55081	4.1249	4.49248	4.20055	4.07327	4.25769	3.94474	MPC1	6
ENSG00000060971	6.02394	5.58664	5.8082	5.61475	5.6494	6.38543	5.53872	5.43467	5.73535	5.67689	5.75867	5.70149	ACAA1	3
ENSG00000060982	5.2427	5.07221	5.16156	6.09066	5.66366	6.78058	6.23888	6.81237	6.2471	6.46354	6.28182	6.39021	BCAT1	12
ENSG00000061273	7.68299	7.89724	7.64489	7.56941	7.67538	6.81848	7.40364	7.00587	7.31577	7.32989	7.16393	7.40018	HDAC7	12
ENSG00000061337	4.86224	5.59931	5.19501	4.81068	5.93846	2.96885	5.25786	4.95234	4.71868	5.02487	4.77051	5.04033	LZTS1	8
ENSG00000061455	3.99282	5.12574	4.64223	3.98266	4.09765	3.9963	5.34709	5.05592	4.18237	5.34087	4.81375	4.22583	PRDM6	5
ENSG00000061656	2.83669	1.18382	2.0279	1.88007	1.11326	2.29347	0.174395	0.822287	1.8672	1.68459	1.96576	1.72177	SPAG4	20
ENSG00000061676	7.07986	7.03503	7.14439	7.29934	6.93451	6.03097	6.7206	6.6996	6.98958	6.94013	6.97372	7.00023	NCKAP1	2
ENSG00000061794	4.57408	4.89855	4.5817	4.8559	5.05489	4.57069	4.76618	4.9877	4.9566	4.85312	4.78507	4.95801	MRPS35	12
ENSG00000061918	5.62271	6.14004	6.43052	4.84312	5.73742	3.63015	5.24813	4.54089	4.54456	5.47979	5.35248	4.86402	GUCY1B1	4
ENSG00000061936	6.32177	6.5456	6.51975	6.7716	6.22475	6.20004	6.57265	6.45627	6.22284	6.38161	6.40473	6.29157	SFSWAP	12
ENSG00000061938	7.02258	7.12978	7.14439	7.22126	6.9068	7.52423	7.77427	7.3221	7.10025	7.25866	7.21455	7.39091	TNK2	3
ENSG00000061987	5.37063	5.82106	6.32537	6.22229	5.77293	6.1146	6.17874	6.01706	5.97339	5.94666	5.96771	6.22534	MON2	12
ENSG00000062038	3.63341	4.13201	4.28308	4.77748	4.56083	4.21417	3.90742	5.96478	4.62754	4.13821	4.55812	3.87998	CDH3	16
ENSG00000062194	6.81334	6.38657	6.77452	7.0636	6.70327	6.71063	6.57265	6.80247	6.54802	6.84607	7.03894	6.92437	GPBP1	5
ENSG00000062282	0.908952	1.18382	0.552258	0.820467	2.45606	1.97334	0.715855	0.822287	1.44737	1.63402	0.186995	0.420078	DGAT2	11
ENSG00000062370	1.86118	2.79389	3.04885	2.23334	1.87147	2.19445	2.58764	1.72448	2.11739	1.95562	2.47686	1.66138	ZNF112	19
ENSG00000062485	5.88086	5.88455	6.0324	6.32235	6.60078	6.62766	6.23396	6.28208	6.5409	6.16941	6.30725	6.21224	CS	12
ENSG00000062524	5.62271	6.09602	6.1602	4.22844	4.6872	2.633	5.11004	4.39049	4.47157	4.27651	5.05506	4.68981	LTK	15
ENSG00000062598	5.62271	5.76593	5.72159	5.35609	6.00343	5.59928	5.78048	5.48503	5.67486	5.67063	5.35736	5.45033	ELMO2	20
ENSG00000062650	5.67321	6.20781	6.11626	6.41375	6.28748	6.2807	6.05873	6.28208	6.33409	6.38161	6.41178	6.47926	WAPL	10
ENSG00000062716	6.91127	6.28042	6.87424	6.39855	7.26737	7.52678	7.10284	6.40488	6.84391	6.47615	6.35925	6.36677	VMP1	17
ENSG00000062725	6.56852	5.54795	6.36835	6.59805	5.76414	5.68385	5.73943	5.83489	5.72283	5.68623	5.60306	5.68073	APPBP2	17
ENSG00000062822	5.64818	4.97832	4.81949	4.72969	5.32391	5.1877	4.61553	5.64862	4.98834	4.98002	5.54438	4.8707	POLD1	19
ENSG00000063046	8.25529	8.7253	8.50939	8.77811	8.97316	8.69121	9.13606	8.98217	8.92575	9.12483	8.95345	8.94324	EIF4B	12
ENSG00000063127	2.42986	2.60576	2.35167	2.11078	2.83775	2.19445	3.39346	2.48781	2.42635	2.55382	1.41179	1.91518	SLC6A16	19
ENSG00000063169	6.38374	5.56096	5.71648	6.21982	5.25022	5.1877	5.01578	5.08886	5.01941	4.96986	4.99372	5.28006	BICRA	19
ENSG00000063176	4.07024	4.02338	4.38964	4.02853	3.99613	4.28807	3.55989	4.03247	3.77246	3.53972	3.52577	3.26081	SPHK2	19
ENSG00000063177	8.60988	8.62043	8.11715	8.03662	8.21667	8.31318	8.13565	8.79774	8.30284	8.4644	8.61096	8.42656	RPL18	19
ENSG00000063180	2.17336	1.64138	1.77618	1.26561	1.31945	2.70671	1.41705	0.822287	1.38514	1.63402	1.07527	1.42761	CA11	19
ENSG00000063241	3.63341	3.94613	3.66215	3.25602	3.80353	4.44708	3.32112	3.45768	3.53517	3.74428	3.19613	3.13323	ISOC2	19
ENSG00000063244	7.95714	7.67286	7.66824	7.85285	7.39393	7.23759	7.31561	7.44803	7.26483	7.38445	7.43132	7.44732	U2AF2	19
ENSG00000063245	6.89007	6.84595	6.83824	6.88658	6.71701	7.09388	6.85317	6.93518	6.91583	6.89923	6.41646	6.64727	EPN1	19
ENSG00000063322	5.64818	5.56096	5.38732	5.85325	5.74191	5.71097	5.72197	5.64862	6.01765	5.97487	6.01169	5.65966	MED29	19
ENSG00000063587	2.83669	4.06051	3.43215	2.90897	3.83747	3.08398	3.51195	3.45768	3.96558	3.6328	3.19613	3.34959	ZNF275	X
ENSG00000063601	6.608	4.97832	6.29998	6.93705	5.2312	5.59928	5.55458	5.53369	5.49502	5.64851	5.43326	5.90562	MTMR1	X
ENSG00000063660	7.87861	7.43911	7.06621	7.50699	7.26425	6.3456	7.70222	6.97977	6.98434	7.25344	7.35166	7.31944	GPC1	2
ENSG00000063761	3.52759	2.9603	3.51688	3.21693	3.60108	3.9963	3.14371	2.67298	3.54943	3.53972	2.98541	3.5208	ADCK1	14
ENSG00000063854	5.06498	5.14315	4.81472	4.82374	4.95021	5.38023	5.12605	4.76123	4.91866	4.61315	4.75581	4.76347	HAGH	16
ENSG00000063978	5.69782	5.89487	5.88079	6.12537	6.13549	5.9724	5.97279	5.77543	6.2471	5.97487	6.00238	6.01221	RNF4	4
ENSG00000064012	4.46365	3.94613	4.28308	4.35983	4.45549	4.77299	4.34154	4.22255	4.27108	3.84776	3.89132	3.78413	CASP8	2
ENSG00000064042	6.83568	4.95879	6.69623	7.17103	4.56083	5.21322	5.3195	5.69214	4.92414	5.22178	5.17596	5.57831	LIMCH1	4
ENSG00000064102	3.41339	3.73269	3.89706	3.87381	4.15261	4.77299	3.89502	4.09865	4.07804	4.43261	4.32896	4.18887	INTS13	12
ENSG00000064115	5.17422	5.72025	5.36464	5.42201	5.66838	5.17477	5.75324	5.85418	5.79939	5.64851	5.89576	5.75665	TM7SF3	12
ENSG00000064195	6.20648	4.47225	5.59089	5.96361	4.04052	4.51021	5.03286	4.71978	4.71236	5.20456	5.40997	5.41876	DLX3	17
ENSG00000064199	2.17336	2.13469	1.85269	1.1869	1.66014	2.19445	1.5496	2.48781	2.07859	1.28654	1.25332	1.49835	SPA17	11
ENSG00000064201	1.86118	2.26764	0.725026	1.72156	2.36591	3.66756	1.19214	0.822287	1.9555	0.915172	1.74529	1.23389	TSPAN32	11
ENSG00000064205	0	1.8252	1.56501	1.41122	0.414007	3.47002	2.31708	2.02603	1.44737	1.63402	1.07527	3.24031	CCN5	20
ENSG00000064225	6.02394	4.16648	5.3841	6.08252	4.26911	5.1877	4.95731	5.18339	4.7437	4.87506	5.07888	5.34868	ST3GAL6	3
ENSG00000064270	0.908952	1.43066	1.20531	1.10364	2.4991	0	0.598332	0	1.56432	3.39538	1.41179	0.685626	ATP2C2	16
ENSG00000064300	7.09846	5.91528	6.81572	4.35983	6.60078	0.982281	4.77974	4.22255	4.99357	4.53262	4.77051	4.23622	NGFR	17
ENSG00000064309	2.64757	1.8252	2.35167	3.11433	2.41169	3.02756	3.44544	3.35311	2.60079	3.53972	3.26005	3.69657	CDON	11
ENSG00000064313	4.34405	4.81411	5.21326	5.21941	5.01837	5.03866	5.08295	4.84074	4.96194	5.08258	5.26692	5.25219	TAF2	8
ENSG00000064393	5.81491	7.36685	6.15455	5.48916	6.3417	5.87982	6.06151	5.55742	5.95476	5.88312	5.97725	6.10298	HIPK2	7
ENSG00000064419	5.2427	5.39647	5.30121	5.43909	5.4554	5.4991	5.37862	5.40882	5.50602	5.35655	5.3719	5.43463	TNPO3	7
ENSG00000064490	4.98727	4.85695	4.79546	4.75037	4.69647	4.64757	4.48916	4.33665	4.72498	4.70788	4.71078	4.57584	RFXANK	19
ENSG00000064545	3.41339	3.8645	2.99922	2.90897	3.49874	3.55231	3.35774	2.67298	3.40008	3.51198	3.73516	3.59531	TMEM161A	19
ENSG00000064547	2.64757	1.8252	1.56501	2.30963	2.5409	4.93512	2.76173	0	3.14234	2.75652	2.28538	2.63348	LPAR2	19
ENSG00000064601	6.54159	6.72397	6.88453	7.4907	7.06916	7.65335	6.7206	6.91696	6.42001	7.02843	6.92361	6.97719	CTSA	20
ENSG00000064607	6.89007	7.08993	7.11362	7.01459	6.79033	7.10415	7.34327	7.14549	6.81764	6.67215	6.45111	7.07736	SUGP2	19
ENSG00000064651	3.732	4.38713	4.27615	5.12229	6.17584	3.33707	5.36069	4.49248	5.76925	5.03465	6.18635	6.01372	SLC12A2	5
ENSG00000064652	5.17422	4.20015	4.47077	4.91814	4.38839	5.05287	4.44729	5.24313	4.99877	4.65179	4.54962	4.81635	SNX24	5
ENSG00000064655	3.63341	3.90589	3.61899	4.07298	4.25662	4.42541	4.24707	4.22255	4.33831	4.56672	4.54107	3.43323	EYA2	20
ENSG00000064666	5.37063	6.08705	5.35481	5.84686	6.29361	6.98328	5.55063	5.98242	6.35656	5.94147	5.69457	5.76743	CNN2	19
ENSG00000064687	3.41339	4.55263	4.86176	4.78418	4.16603	5.87183	5.02149	4.76123	4.79247	4.73212	4.59162	4.44315	ABCA7	19
ENSG00000064692	2.42986	3.53583	2.87632	4.0172	4.20555	3.13827	3.2053	2.67298	4.31347	3.89147	3.12925	3.57908	SNCAIP	5
ENSG00000064703	3.41339	4.3576	4.28308	4.33267	4.04052	3.73957	4.07077	3.24036	4.08785	4.16517	4.05641	4.16732	DDX20	1
ENSG00000064726	4.98727	5.45341	5.45944	4.91203	5.59587	5.42459	5.25786	5.38249	5.69744	5.52559	5.35736	5.26493	BTBD1	15
ENSG00000064763	4.28031	4.32745	5.3316	4.42986	4.31801	4.85633	4.53785	3.9631	4.20055	4.51176	3.94416	5.02543	FAR2	12
ENSG00000064787	0.908952	0	0	0.595171	1.22004	1.97334	2.38962	2.02603	0.655995	2.3179	0	0.420078	BCAS1	20
ENSG00000064886	0.908952	0.509876	0.804224	2.75378	4.75092	6.60374	2.31708	2.02603	4.8512	4.14726	1.07527	2.23817	CHI3L2	1
ENSG00000064932	6.91127	7.02567	6.62848	6.70607	7.57835	7.47498	6.62617	6.73124	6.80729	6.7499	6.70757	6.52974	SBNO2	19
ENSG00000064933	4.28031	4.74736	4.21949	4.1886	4.83732	4.70266	4.65285	4.22255	4.53026	4.72005	4.53246	4.57175	PMS1	2
ENSG00000064961	8.06036	6.6283	7.31803	7.49274	6.30578	6.54466	6.09985	6.9621	6.52656	6.22599	6.62097	5.98321	HMG20B	19
ENSG00000064989	3.52759	4.0967	4.44629	2.45107	4.57096	1.20212	2.67731	1.72448	4.09758	3.3174	4.05641	3.40588	CALCRL	2
ENSG00000064995	5.06498	4.62877	4.99432	5.13806	5.42224	4.60964	5.01578	4.84074	4.81625	4.93373	5.25651	5.00128	TAF11	6
ENSG00000064999	6.98309	8.1805	7.54467	7.46799	8.23031	6.8309	7.8921	7.00587	7.53582	7.95435	7.93081	7.83759	ANKS1A	6
ENSG00000065000	8.11619	8.11583	7.9056	8.14859	7.86626	7.86536	7.896	8.28242	7.87206	7.82436	7.48691	7.62036	AP3D1	19
ENSG00000065029	6.70828	5.25948	6.70399	6.9128	5.48782	5.60892	5.92782	5.73439	5.82012	5.56998	5.70609	5.84922	ZNF76	6
ENSG00000065054	7.41272	7.34444	6.96752	5.50141	6.11488	3.87364	6.20912	5.892	6.19136	6.05153	6.20541	6.42921	SLC9A3R2	16
ENSG00000065057	2.83669	4.29666	3.08101	2.72621	2.93501	2.29347	3.14371	2.02603	2.78076	3.11103	3.28074	3.04145	NTHL1	16
ENSG00000065060	4.40509	4.76996	4.77103	4.68743	5.0035	5.39145	5.1679	4.91609	5.3231	5.01996	5.35736	5.58035	UHRF1BP1	6
ENSG00000065135	5.98448	6.21606	5.93898	6.20741	6.5247	6.45125	6.24133	6.48129	6.37269	6.39875	6.57982	6.30767	GNAI3	1
ENSG00000065150	5.81491	6.83527	6.38133	6.34745	6.87651	6.41871	6.37241	6.6003	6.67537	6.60809	6.9269	6.52128	IPO5	13
ENSG00000065154	5.40091	5.64891	5.73176	5.75776	5.84561	5.98727	5.8302	6.26777	6.31335	6.22812	6.33966	6.46056	OAT	10
ENSG00000065183	3.99282	4.72441	4.4401	4.10544	4.71485	4.21417	4.39538	3.64652	4.27108	4.53262	4.52381	4.37898	WDR3	1
ENSG00000065243	5.2427	6.18277	6.11432	6.11478	6.22154	5.72877	6.2608	5.79552	6.33615	6.33092	6.4188	6.44832	PKN2	1
ENSG00000065268	5.27576	4.85695	4.64223	4.17846	4.51962	4.28807	4.6964	4.63311	4.42593	4.94933	4.73347	4.68603	WDR18	19
ENSG00000065308	7.62002	7.60222	7.85651	7.89137	7.26892	6.75039	7.64409	7.36307	7.39291	7.48863	7.53937	7.77841	TRAM2	6
ENSG00000065320	4.28031	2.79389	2.85788	3.58244	3.5198	2.77685	2.42457	3.45768	3.00424	4.08273	3.52577	3.06495	NTN1	17
ENSG00000065325	3.15366	1.43066	1.47105	1.1869	0.221804	1.7121	1.93614	2.98438	1.6725	1.91384	2.15696	2.46707	GLP2R	17
ENSG00000065328	2.64757	0.885851	2.78165	2.75378	3.6207	2.55531	1.19214	3.11804	2.96223	1.99623	3.59349	2.2587	MCM10	10
ENSG00000065357	5.79224	5.67309	5.93238	6.12008	5.31188	6.14806	6.03065	5.71342	5.6286	5.82795	5.79867	6.27655	DGKA	12
ENSG00000065361	6.85769	5.50819	6.60931	7.24331	5.13895	6.03097	6.82402	6.40488	6.24272	6.59658	6.69607	7.05846	ERBB3	12
ENSG00000065413	4.40509	4.72441	5.13882	4.44685	4.70569	6.2807	4.83923	5.15256	5.17464	4.68322	4.319	4.79894	ANKRD44	2
ENSG00000065427	6.44316	6.39386	6.0928	6.43732	6.61553	7.1577	6.40559	6.62296	6.41418	6.61788	6.39052	6.3937	KARS1	16
ENSG00000065457	4.86224	4.49955	4.60953	5.01245	4.39979	4.87244	4.50557	3.9631	4.3788	4.4619	4.01996	4.50029	ADAT1	16
ENSG00000065485	5.85921	6.07802	5.8785	5.58436	5.19239	5.72877	5.52671	5.87321	6.27311	5.89122	5.8341	6.57546	PDIA5	3
ENSG00000065491	3.91101	4.55263	4.05112	4.48025	4.53003	4.48947	4.15642	4.44238	4.4413	4.30103	4.71838	4.63199	TBC1D22B	6
ENSG00000065518	5.02665	4.72441	4.3832	4.65124	5.0035	4.64757	4.49739	4.54089	4.64756	4.74409	4.92965	4.74177	NDUFB4	3
ENSG00000065526	6.79064	7.22279	6.84878	7.04001	6.60571	6.39103	6.56875	6.32419	6.73428	6.79087	6.78021	6.77565	SPEN	1
ENSG00000065534	7.84045	7.69369	8.00009	7.64589	7.4635	4.05393	6.74154	6.67812	6.43928	7.27526	6.73595	6.1255	MYLK	3
ENSG00000065548	6.22352	6.39386	6.10848	6.55168	6.45535	6.25021	6.05315	6.3651	6.07545	6.21313	6.27925	6.30273	ZC3H15	2
ENSG00000065559	5.13872	5.05391	5.4867	5.43909	5.35353	5.00983	5.08841	5.12106	5.17923	5.42507	5.2721	5.22115	MAP2K4	17
ENSG00000065600	3.28936	3.42631	3.31535	3.40255	2.96603	4.26386	2.76173	3.89022	3.36826	3.36469	3.34109	3.56267	PACC1	1
ENSG00000065613	6.76759	7.01152	6.98462	7.15302	7.03483	6.91495	7.2416	6.98852	7.16881	7.1012	7.43594	7.58117	SLK	10
ENSG00000065615	3.91101	3.17865	3.87888	4.35983	4.05502	5.12186	4.02595	4.63311	4.3465	3.96492	3.65818	3.98841	CYB5R4	6
ENSG00000065618	3.41339	6.26459	3.94153	6.98291	5.62045	6.03813	4.45576	5.15256	5.72597	7.31993	7.57541	6.07721	COL17A1	10
ENSG00000065621	2.42986	1.18382	1.96034	1.1869	1.22004	0.406205	1.02001	2.02603	1.8672	1.07536	1.68448	2.039	GSTO2	10
ENSG00000065665	3.15366	3.03681	3.55173	2.88423	2.93501	2.633	3.01203	2.83707	2.57314	2.95497	2.58064	2.95606	SEC61A2	10
ENSG00000065717	6.11809	5.29107	6.0609	6.06062	5.18581	4.40341	4.54581	5.12106	4.99877	4.81391	4.94917	5.09271	TLE2	19
ENSG00000065802	4.21363	5.07221	4.48286	3.74236	4.34185	4.13627	4.63057	4.76123	4.19149	4.60004	4.40633	4.33133	ASB1	2
ENSG00000065809	5.9232	4.70109	5.58529	6.46469	5.16592	5.92685	4.46418	5.40882	5.08938	5.2388	4.72594	4.96114	FAM107B	10
ENSG00000065833	2.17336	2.13469	1.96034	1.54347	2.31863	4.55081	2.96533	3.45768	3.49153	2.75652	2.64589	3.19843	ME1	6
ENSG00000065882	7.74923	6.79178	7.53745	8.009	6.75303	6.64183	6.21162	7.01447	6.79837	6.46896	6.69991	6.65309	TBC1D1	4
ENSG00000065883	5.85921	6.21606	6.38455	6.61506	6.19887	6.3798	6.52312	6.194	6.3279	6.28659	6.2027	6.35252	CDK13	7
ENSG00000065911	3.732	3.82189	4.14538	4.13719	6.14568	6.21275	3.73716	4.80153	5.18837	4.86413	5.11965	4.56352	MTHFD2	2
ENSG00000065923	2.64757	2.87949	2.59381	3.21693	2.96603	3.77427	2.89231	2.83707	3.30244	2.77997	3.15189	3.0995	SLC9A7	X
ENSG00000065970	4.34405	5.53482	5.37115	5.7093	5.48782	5.33445	5.51053	4.95234	5.75394	5.75587	6.21619	5.79404	FOXJ2	12
ENSG00000065978	8.12528	8.64202	8.13737	8.20835	8.99682	9.4408	8.40485	8.93313	8.83409	8.81835	8.65719	8.51372	YBX1	1
ENSG00000065989	4.07024	4.85695	4.1903	3.86119	4.55064	5.12186	4.75935	4.9877	4.89652	4.90203	3.98256	4.08926	PDE4A	19
ENSG00000066027	5.3397	6.23242	5.60201	5.59583	6.26895	5.1877	5.51864	5.24313	5.83183	5.94147	6.60465	6.30644	PPP2R5A	1
ENSG00000066044	6.00435	6.09602	6.05686	5.89098	6.19887	5.52989	5.70074	5.48503	5.8521	5.87498	5.8306	5.80629	ELAVL1	19
ENSG00000066056	7.24756	8.27237	7.74175	7.6039	8.74464	1.7121	7.47623	6.80247	8.18049	7.68538	8.82022	8.57536	TIE1	1
ENSG00000066084	6.51414	5.92538	6.40851	6.48539	5.68712	6.16123	6.06151	6.26777	6.08771	6.12661	6.03319	6.62175	DIP2B	12
ENSG00000066117	5.96435	5.76593	6.07494	6.20242	6.06203	5.32277	6.06428	5.892	5.91126	5.93887	5.91574	5.91696	SMARCD1	12
ENSG00000066135	4.28031	4.8779	4.36373	4.63651	4.24402	4.72057	4.5218	4.44238	4.3218	4.53262	4.3487	4.57584	KDM4A	1
ENSG00000066136	5.88086	5.61187	5.93458	6.17209	5.69639	5.93454	6.05594	5.67054	5.78741	5.97233	6.02708	5.77991	NFYC	1
ENSG00000066279	2.42986	3.68594	3.55173	3.47058	3.73315	4.21417	2.86712	4.84074	4.35464	2.89181	4.22604	3.3686	ASPM	1
ENSG00000066294	4.46365	4.2652	3.55173	4.8041	5.84978	7.03428	5.8367	5.32835	6.18453	5.23032	4.17168	5.50289	CD84	1
ENSG00000066322	6.04327	6.14869	6.0609	5.8596	6.00717	5.35752	5.61256	6.22396	6.04054	5.95441	5.76969	5.86771	ELOVL1	1
ENSG00000066336	4.94679	6.13135	4.94275	5.26323	6.87243	8.11083	6.20661	6.48129	6.3926	6.0919	4.84187	5.38881	SPI1	11
ENSG00000066379	3.732	2.9603	3.06502	2.34631	2.76907	2.77685	2.27939	2.67298	2.36319	2.73269	2.90772	2.63348	POLR1H	6
ENSG00000066382	2.42986	1.98823	1.69538	0.921162	0.872596	1.56129	2.27939	2.27531	2.11739	1.95562	1.16704	2.0857	MPPED2	11
ENSG00000066422	4.21363	5.16036	4.95147	5.16398	5.09051	4.98041	4.71769	5.43467	5.18381	5.17391	6.00238	5.50718	ZBTB11	3
ENSG00000066427	3.99282	5.09027	4.65297	4.57602	5.0035	4.93512	4.98684	4.03247	4.7437	4.96476	4.73347	4.91016	ATXN3	14
ENSG00000066455	6.91127	6.00372	6.39738	6.59042	5.7284	5.9724	5.78384	6.28208	6.02532	5.98499	5.65153	5.84583	GOLGA5	14
ENSG00000066468	5.48813	5.32198	5.57968	5.93077	4.75092	4.90412	6.38799	5.87321	5.431	6.05394	6.27667	6.69699	FGFR2	10
ENSG00000066557	4.28031	4.49955	3.78438	4.30498	4.49856	3.28988	4.22742	3.64652	4.24503	4.33309	4.45265	4.26693	LRRC40	1
ENSG00000066583	3.99282	4.20015	4.04298	4.72969	5.04039	4.28807	4.48916	4.8789	4.47903	4.73812	5.25128	5.26239	ISOC1	5
ENSG00000066629	5.45964	6.08705	6.1602	5.55723	4.67786	4.68453	5.14189	5.2721	4.99877	5.18713	4.62437	5.13218	EML1	14
ENSG00000066651	3.15366	3.42631	3.56316	3.79638	3.56101	3.47002	3.47908	3.89022	3.08477	3.80268	3.65818	3.43323	TRMT11	6
ENSG00000066654	5.98448	5.97484	5.76431	5.88787	5.60082	5.77234	5.88455	5.92885	5.74777	5.81665	6.15867	5.96459	THUMPD1	16
ENSG00000066697	4.46365	3.03681	3.85117	4.3235	3.71501	3.66756	3.94402	4.16193	3.723	3.96492	4.14935	4.50459	MSANTD3	9
ENSG00000066735	4.67667	6.22426	5.23128	4.56827	5.07637	2.77685	5.63139	4.76123	4.64756	5.85855	5.45618	5.35823	KIF26A	14
ENSG00000066739	4.77244	5.35223	5.45023	5.48505	5.23757	4.87244	5.62012	5.15256	5.42714	5.27226	5.60306	5.88926	ATG2B	14
ENSG00000066777	6.06234	6.01322	6.20102	6.34745	5.97322	5.94981	5.95198	6.11625	6.36867	6.02724	6.05137	6.39021	ARFGEF1	8
ENSG00000066827	8.27177	7.4285	7.90279	8.29885	6.87855	6.89931	7.36255	7.33588	7.17917	7.19577	8.3281	7.81784	ZFAT	8
ENSG00000066855	4.40509	3.82189	4.35717	4.63651	4.02588	3.42705	4.04854	3.9631	3.63214	3.95465	4.01996	4.01278	MTFR1	8
ENSG00000066923	0.908952	0.885851	1.69538	1.26561	1.58221	2.633	1.3459	2.02603	1.9555	1.52723	2.32576	1.39089	STAG3	7
ENSG00000066926	4.40509	4.55263	4.88471	5.41771	4.854	5.21322	4.90258	5.21357	4.7437	5.18713	5.03693	5.32941	FECH	18
ENSG00000066933	6.85769	5.07221	6.36346	6.26842	4.98847	4.53065	5.39634	5.38249	5.38006	5.39881	5.07888	5.4119	MYO9A	15
ENSG00000067048	0	6.85125	0	0	7.25643	0	0	0	0	0	0	7.90139	DDX3Y	Y
ENSG00000067057	3.99282	4.44443	2.68032	4.56827	4.25662	6.8835	4.8457	4.63311	4.90208	5.81382	4.71838	4.13438	PFKP	10
ENSG00000067064	5.3397	5.36713	5.17652	5.34254	5.51953	5.59928	4.99848	5.48503	5.91402	5.79955	6.36652	5.26493	IDI1	10
ENSG00000067066	6.09975	6.4786	6.36182	6.56536	7.10617	7.60356	6.85798	6.9621	7.17572	6.85713	6.6067	6.31136	SP100	2
ENSG00000067082	7.20528	8.75392	7.57392	9.65562	10.1528	9.6315	8.63163	9.69812	9.73198	10.0353	9.31868	9.68844	KLF6	10
ENSG00000067113	3.99282	4.85695	4.71064	4.0172	4.60091	5.73759	4.35065	3.64652	5.77836	4.75597	4.40633	4.45654	PLPP1	5
ENSG00000067141	3.15366	3.30779	1.69538	2.45107	3.36551	2.55531	3.32112	3.81347	3.49153	3.23497	3.05912	3.38736	NEO1	15
ENSG00000067167	6.96293	7.78248	7.54683	7.57135	7.89676	7.56444	7.3004	7.69799	7.74618	7.54103	7.31451	7.54612	TRAM1	8
ENSG00000067177	2.17336	3.17865	3.24612	2.41698	2.93501	2.633	2.35381	2.02603	2.80474	2.68381	3.89132	2.99327	PHKA1	X
ENSG00000067182	7.14393	7.44614	7.06621	7.08818	7.50105	7.35401	7.2683	7.06501	7.25072	7.3652	6.7322	6.96319	TNFRSF1A	12
ENSG00000067191	3.52759	3.42631	2.94783	2.54873	3.36551	3.42705	3.47908	2.83707	3.23347	3.39538	3.19613	2.69501	CACNB1	17
ENSG00000067208	5.30808	5.49469	5.48069	5.76116	5.3997	5.57979	5.40511	5.55742	5.53139	5.50111	5.17043	5.61658	EVI5	1
ENSG00000067221	4.14372	4.49955	3.96756	3.47058	4.43347	3.87364	4.22742	3.64652	3.61868	3.58035	3.59349	3.93202	STOML1	15
ENSG00000067225	8.35534	8.27039	7.93449	8.44077	8.77232	9.60884	7.89054	8.73929	8.5652	8.67992	8.78625	8.39417	PKM	15
ENSG00000067248	4.90513	5.27536	5.39693	5.54939	5.60082	5.38023	5.29138	5.08886	5.54923	5.56662	5.46524	5.42331	DHX29	5
ENSG00000067334	5.90219	5.98453	5.8785	6.21487	6.03303	5.99464	5.7771	6.14785	5.97603	6.10357	6.4188	6.0495	DNTTIP2	1
ENSG00000067365	3.91101	4.16648	4.47683	4.58372	3.99613	4.40341	4.52985	4.67709	4.16395	4.24316	4.05641	4.13438	METTL22	16
ENSG00000067369	5.96435	6.24053	6.30168	6.36095	6.12522	5.83943	6.07257	6.11625	6.20943	6.06113	6.3198	6.20961	TP53BP1	15
ENSG00000067445	3.41339	4.20015	4.5929	3.29407	4.49856	0.982281	4.5616	4.44238	4.01779	3.9339	4.60809	4.56764	TRO	X
ENSG00000067533	4.07024	4.65328	4.20497	3.82266	4.58101	3.9666	3.93192	4.58774	4.09758	4.20902	4.10363	4.07197	RRP15	1
ENSG00000067560	8.49174	8.80677	8.43979	8.43227	8.77888	8.94551	8.28635	8.39535	8.57525	8.56442	8.60174	8.56071	RHOA	3
ENSG00000067596	5.2427	6.01322	5.73176	6.01007	5.90283	5.4991	5.75667	5.69214	5.9085	5.68001	5.66733	5.63436	DHX8	17
ENSG00000067601	1.86118	1.8252	1.92534	1.82914	0.997939	0.406205	1.93614	0.822287	1.61943	1.58161	1.41179	1.96599	PMS2P4	7
ENSG00000067606	9.14076	7.21458	8.80848	8.56269	5.42782	5.52989	5.253	6.53008	5.9494	5.71388	5.45162	6.06706	PRKCZ	1
ENSG00000067646	0	4.20015	0	0	4.3769	0	0	0	0	0	0	4.22583	ZFY	Y
ENSG00000067704	6.55511	6.36447	6.63661	6.8213	6.55562	6.2807	6.59966	6.90776	6.57962	6.67684	6.93018	6.92838	IARS2	1
ENSG00000067715	2.83669	3.24467	3.5745	3.67186	2.83775	2.96885	3.79172	3.64652	3.0248	3.05447	2.88087	3.4864	SYT1	12
ENSG00000067798	0	3.03681	2.0279	2.06749	3.05526	4.42541	4.09266	3.55519	4.29666	2.82575	1.62098	3.1662	NAV3	12
ENSG00000067829	5.79224	5.22719	5.42226	5.73719	5.4554	5.58957	5.15235	5.55742	5.42714	5.2887	5.14244	5.27755	IDH3G	X
ENSG00000067836	3.99282	2.70289	2.37779	3.17676	2.65949	2.77685	2.86712	3.45768	2.03871	2.73269	3.10625	2.95606	ROGDI	16
ENSG00000067842	1.86118	2.79389	2.06052	0.595171	1.41246	0.406205	1.78297	0	1.32009	1.14924	1.48495	1.14848	ATP2B3	X
ENSG00000067900	6.3685	7.06731	6.98568	6.93705	7.16416	7.48549	6.91899	6.71023	7.34977	7.14701	7.12155	7.01915	ROCK1	18
ENSG00000067955	4.28031	5.24343	4.93397	5.23417	5.65417	5.73759	5.12073	5.55742	5.33961	5.30899	5.19789	5.07257	CBFB	16
ENSG00000067992	3.52759	4.62877	4.37025	3.36729	4.1925	4.84004	4.03729	3.45768	4.28818	4.09212	4.45265	4.59211	PDK3	X
ENSG00000068001	6.18923	6.42977	6.0829	4.98364	5.83305	3.90529	4.98684	3.73241	5.21991	4.80822	5.19789	5.36771	HYAL2	3
ENSG00000068024	4.07024	3.68594	3.36843	3.61286	3.76877	4.13627	3.96791	3.9631	3.95491	4.31715	3.47281	3.89972	HDAC4	2
ENSG00000068028	5.02665	5.92538	5.77909	5.396	5.65892	6.20641	5.55458	5.81534	5.6286	5.51864	5.54865	5.55153	RASSF1	3
ENSG00000068078	5.30808	5.91528	5.38088	4.404	5.0035	2.4732	6.089	5.18339	3.78456	5.79092	4.71078	4.99518	FGFR3	4
ENSG00000068079	3.82428	4.44443	3.84182	3.76963	4.43347	6.42418	4.39538	4.76123	4.69963	4.56672	4.39688	4.19421	IFI35	17
ENSG00000068097	4.62629	4.52633	3.8697	4.41267	4.659	4.28807	4.1249	3.73241	4.43364	4.34885	4.25769	4.30197	HEATR6	17
ENSG00000068120	8.51269	6.43685	8.1273	8.66378	6.09397	6.05939	6.3544	6.99723	6.22284	6.1958	6.51799	6.45834	COASY	17
ENSG00000068137	5.96435	5.87416	5.70363	5.17422	5.17921	4.48947	5.59733	5.05592	4.87404	5.31702	5.34268	5.44809	PLEKHH3	17
ENSG00000068305	5.72201	6.52582	6.0324	5.67366	6.44713	6.61336	6.05036	6.0675	6.77883	6.02724	5.86526	6.00311	MEF2A	15
ENSG00000068308	6.70828	6.33447	6.40375	6.78502	6.20538	6.18077	6.05036	6.23871	6.16845	6.15603	6.16425	5.98936	OTUD5	X
ENSG00000068323	7.03229	6.76953	6.75721	7.02877	6.71016	6.78058	6.62241	6.6996	6.82498	6.68928	6.66689	6.86118	TFE3	X
ENSG00000068354	4.72535	3.8645	4.09114	4.79085	3.67802	3.77427	3.63642	4.58774	4.03816	4.12911	3.70486	3.96986	TBC1D25	X
ENSG00000068366	6.59496	5.12574	7.1661	7.84326	6.43055	6.47781	5.56245	6.37848	6.09015	6.02479	5.31787	6.26899	ACSL4	X
ENSG00000068383	5.67321	6.19951	5.34821	4.77075	5.79037	4.35838	4.9751	4.8789	5.56686	5.33296	5.26692	4.81289	INPP5A	10
ENSG00000068394	5.2427	4.29666	4.77103	4.98945	4.63025	4.44708	4.42157	4.76123	4.47157	4.64542	4.54962	4.63983	GPKOW	X
ENSG00000068400	6.55511	6.76953	6.7027	6.74951	6.37096	7.00901	6.53516	6.44359	6.43161	6.29678	6.11325	6.26646	GRIPAP1	X
ENSG00000068438	3.41339	4.57846	3.61899	3.59773	4.01108	4.13627	3.89502	3.64652	3.85514	3.97511	3.36066	3.71154	FTSJ1	X
ENSG00000068489	3.00386	3.42631	3.44457	3.97097	4.84568	5.29914	3.77827	4.67709	5.18837	4.20902	5.26173	4.21011	PRR11	17
ENSG00000068615	3.28936	1.98823	2.40345	1.88007	1.93555	2.77685	3.05728	1.34279	2.60079	2.49836	1.33473	2.06254	REEP1	2
ENSG00000068650	4.62629	6.24053	5.63488	6.02994	6.32983	6.15466	6.72235	5.83489	6.11912	5.92579	5.70609	6.14768	ATP11A	13
ENSG00000068654	4.86224	6.26459	5.80097	5.56504	5.59091	5.7199	5.72548	5.77543	5.68135	5.67376	5.19789	5.58645	POLR1A	2
ENSG00000068697	8.80369	8.57785	8.79067	9.07304	8.00058	7.70598	7.74259	8.48159	8.0834	8.13738	8.11059	8.05853	LAPTM4A	2
ENSG00000068724	6.38374	5.24343	5.73429	6.39855	5.75084	6.60856	5.86242	6.13214	6.13339	6.07778	5.97725	6.28283	TTC7A	2
ENSG00000068745	6.59496	6.24859	6.41956	6.22722	5.91083	6.14143	6.68681	5.87321	6.26665	6.16274	6.51144	6.32845	IP6K2	3
ENSG00000068784	3.41339	3.53583	4.35059	4.17846	4.02588	4.77299	3.99141	4.22255	4.2274	4.29291	4.22604	4.06032	SRBD1	2
ENSG00000068796	6.33752	5.03538	6.91049	7.16334	5.51953	5.98727	5.51459	5.83489	5.8521	5.54625	5.61126	5.71455	KIF2A	5
ENSG00000068831	6.35309	6.68289	6.03855	5.08479	5.97703	4.9197	5.53072	5.08886	5.86356	5.63572	5.50535	5.87769	RASGRP2	11
ENSG00000068878	5.17422	5.64891	5.74185	5.86909	5.84978	6.27465	5.73595	5.87321	5.91126	5.66749	5.70991	5.94573	PSME4	2
ENSG00000068885	2.64757	3.48211	2.83919	2.11078	2.65949	2.38613	3.01203	2.48781	2.51621	2.3806	2.8535	2.67987	IFT80	3
ENSG00000068903	5.72201	5.58664	5.77172	5.90334	6.05483	6.21275	6.23396	5.64862	6.05561	6.03701	6.19455	6.36559	SIRT2	19
ENSG00000068912	6.70828	6.14004	6.52998	6.72186	6.09397	6.03097	5.95198	6.10018	6.04809	6.17384	5.91904	6.25883	ERLEC1	2
ENSG00000068971	4.57408	5.10812	4.99854	4.52893	4.51962	4.93512	4.61553	4.22255	4.46406	4.7261	4.40633	4.79543	PPP2R5B	11
ENSG00000068976	3.00386	2.70289	2.80109	2.69811	1.73408	2.77685	1.93614	0.822287	2.89683	2.28551	3.0104	2.15303	PYGM	11
ENSG00000069011	3.41339	4.16648	3.06502	2.83346	2.76907	3.90529	3.33955	4.22255	3.16103	4.11995	3.49068	3.3206	PITX1	5
ENSG00000069020	6.41375	6.41551	6.61206	7.01459	6.15244	5.06693	6.03348	6.25331	6.10471	6.35843	6.85283	6.7951	MAST4	5
ENSG00000069122	5.9232	7.73446	7.70159	6.62256	8.2836	4.0254	6.24378	5.53369	6.78337	6.43428	6.87511	6.89271	ADGRF5	6
ENSG00000069188	3.99282	2.87949	3.23187	1.54347	2.73346	3.51175	2.96533	3.11804	3.16103	3.09242	2.79717	3.99454	SDK2	17
ENSG00000069248	5.43058	5.52156	5.71904	5.71282	5.66366	5.09466	5.62012	5.83489	5.60831	5.52906	5.72509	5.83049	NUP133	1
ENSG00000069275	7.39778	7.77412	7.68075	7.54595	7.84764	7.77828	7.5845	7.97844	7.79935	7.68227	7.97909	7.53827	NUCKS1	1
ENSG00000069329	6.84673	6.81369	6.70528	6.87407	6.7707	6.87953	6.98487	6.87035	6.89923	6.89789	6.63911	6.78364	VPS35	16
ENSG00000069345	5.9232	6.06894	6.25839	6.32004	5.92668	6.24403	6.09714	6.32419	6.0506	6.1289	6.28949	6.32602	DNAJA2	16
ENSG00000069399	4.51992	4.62877	4.1903	4.14762	5.93846	5.52989	4.70353	4.8789	5.08938	5.09665	4.89652	4.73812	BCL3	19
ENSG00000069424	3.52759	4.38713	3.21747	3.64266	4.87049	6.94952	4.50557	4.22255	5.44632	4.82522	3.73516	5.12661	KCNAB2	1
ENSG00000069431	0	3.10948	2.98229	2.69811	2.80382	1.20212	3.4956	3.81347	3.25102	4.02502	2.8535	3.01756	ABCC9	12
ENSG00000069493	3.00386	3.53583	3.75478	3.75606	3.34206	5.20052	4.37765	3.73241	4.25377	3.96492	3.57686	3.75553	CLEC2D	12
ENSG00000069509	2.83669	3.53583	2.80109	2.83346	2.83775	3.1906	2.98887	4.39049	3.33572	3.01549	3.41782	3.06495	FUNDC1	X
ENSG00000069535	0.908952	1.43066	1.81494	2.54873	2.36591	6.09414	2.38962	3.55519	5.99439	2.34959	1.16704	2.66457	MAOB	X
ENSG00000069667	4.07024	2.60576	4.16802	4.54479	3.5198	4.0819	2.61816	2.83707	3.57753	3.4837	3.15189	3.3686	RORA	15
ENSG00000069696	3.63341	1.64138	3.12795	2.02287	1.31945	2.29347	2.31708	1.34279	2.26292	1.99623	1.80365	1.72177	DRD4	11
ENSG00000069702	7.62002	7.1122	7.8111	8.21456	7.24699	7.61557	7.3387	7.70863	7.62939	7.93097	7.28537	7.68766	TGFBR3	1
ENSG00000069812	7.49925	3.90589	5.67231	7.22373	4.09765	4.23923	2.55647	4.91609	3.93333	4.44733	3.37997	3.9384	HES2	1
ENSG00000069849	6.72033	6.22426	6.51093	6.88658	6.58588	6.79755	5.89081	6.56562	6.87679	6.1605	6.65901	6.559	ATP1B3	3
ENSG00000069869	5.64818	5.63667	5.83202	6.18734	5.94626	5.17477	6.30602	6.03407	6.07545	6.05153	6.29713	6.80821	NEDD4	15
ENSG00000069943	3.28936	3.10948	2.96516	3.29407	2.90332	3.13827	3.12258	2.48781	3.1977	2.80304	3.28074	3.13323	PIGB	15
ENSG00000069956	5.2427	4.93899	5.3148	5.44756	5.46086	5.00983	4.71769	5.18339	5.50967	5.20456	5.64756	5.69774	MAPK6	15
ENSG00000069966	2.42986	3.82189	2.93028	3.36729	3.6207	4.33532	4.01453	3.35311	4.24503	3.91284	3.67391	3.44223	GNB5	15
ENSG00000069974	4.46365	5.10812	4.39604	4.37766	5.29366	5.36892	4.61553	4.95234	5.00396	4.64542	4.47975	4.34099	RAB27A	15
ENSG00000069998	5.13872	4.57846	4.56474	4.17846	4.60091	4.60964	4.19742	3.24036	4.19149	4.25993	4.3778	4.11763	HDHD5	22
ENSG00000070010	6.24037	5.07221	5.79856	6.09605	5.68246	5.88777	5.36519	5.892	5.40379	5.38741	5.2824	5.40271	UFD1	22
ENSG00000070018	5.13872	6.85125	6.72322	5.65551	6.73062	3.28988	6.66323	5.38249	5.9813	6.21957	6.73032	7.06939	LRP6	12
ENSG00000070047	6.69612	6.49225	6.38777	6.79501	6.25959	6.20641	6.22656	6.46884	6.25799	6.38925	6.21619	6.48907	PHRF1	11
ENSG00000070061	5.45964	5.96508	5.85777	5.5256	5.84978	5.74636	5.90944	5.96478	5.40771	5.66119	5.96771	5.77279	ELP1	9
ENSG00000070081	7.98239	5.74327	7.53382	7.57038	5.53512	6.48306	5.3195	6.48129	6.03549	6.04187	5.82003	6.36322	NUCB2	11
ENSG00000070087	4.57408	3.53583	5.08036	5.23417	3.36551	3.70401	4.15642	4.22255	4.20956	4.44733	4.36816	4.21011	PFN2	3
ENSG00000070159	6.44316	5.19416	6.16208	6.5556	5.13213	4.68453	5.36069	5.48503	5.53855	5.3682	5.54438	5.91858	PTPN3	9
ENSG00000070182	5.9232	6.55864	6.4568	4.35083	5.46086	0.406205	4.54581	4.54089	4.91315	4.76774	5.11965	4.01278	SPTB	14
ENSG00000070190	2.42986	2.38937	2.83919	4.19866	4.38839	5.76373	3.39346	3.24036	4.49386	4.56672	3.19613	3.18777	DAPP1	4
ENSG00000070193	3.91101	4.16648	3.97614	3.87381	4.46638	3.63015	4.73867	4.84074	4.20055	4.34885	2.44055	3.3686	FGF10	5
ENSG00000070214	6.67148	6.53904	6.96752	6.73575	6.02936	5.46764	5.92477	6.29625	6.15918	6.16274	6.79107	6.17493	SLC44A1	9
ENSG00000070269	3.91101	4.57846	4.57042	4.599	4.53003	4.0254	4.86491	4.33665	4.50853	4.49769	4.73347	4.76706	TMEM260	14
ENSG00000070366	5.59678	5.78823	5.81299	5.67727	5.56582	5.36892	6.00201	5.64862	5.9085	5.85027	5.8306	5.86604	SMG6	17
ENSG00000070367	5.27576	5.53482	5.80097	5.73374	5.93846	5.56004	5.85283	5.40882	5.92226	5.92579	5.93218	6.1897	EXOC5	14
ENSG00000070371	4.28031	3.77798	3.66215	2.27199	3.02613	2.70671	3.28354	2.27531	3.26836	2.73269	3.0104	2.4846	CLTCL1	22
ENSG00000070404	6.79064	7.88435	5.73176	7.36114	7.27203	8.82136	6.06151	7.34273	8.89188	8.85469	7.79986	8.72622	FSTL3	19
ENSG00000070413	6.47197	6.42266	6.45373	6.51187	6.30881	6.33401	6.39681	6.53008	6.40441	6.68463	6.55668	6.58666	DGCR2	22
ENSG00000070423	6.06234	5.16036	5.46554	5.30109	4.79477	4.9197	4.7456	5.05592	5.13264	4.8025	4.82083	5.11821	RNF126	19
ENSG00000070444	6.18923	5.87416	5.86702	6.24675	5.74638	5.64687	5.83345	5.75505	5.7844	5.81097	5.57821	5.71455	MNT	17
ENSG00000070476	5.10232	5.14315	5.31817	5.34254	4.94243	4.96547	5.40948	4.54089	5.01941	4.93895	4.77051	4.73079	ZXDC	3
ENSG00000070495	4.98727	5.54795	5.06838	5.44756	5.16592	5.28717	4.51371	5.15256	5.80237	5.63893	6.51363	5.77991	JMJD6	17
ENSG00000070501	3.28936	3.10948	2.98229	2.9572	2.99639	4.0819	3.2053	3.24036	3.1234	2.84811	3.47281	3.56267	POLB	8
ENSG00000070526	1.86118	2.50162	2.0279	1.41122	1.87147	0	3.37571	2.02603	1.32009	2.95497	3.05912	2.27894	ST6GALNAC1	17
ENSG00000070540	6.85769	5.99416	6.6024	6.64481	6.16251	6.27465	6.32001	6.40488	6.58309	6.28249	6.15587	6.61181	WIPI1	17
ENSG00000070601	2.42986	0.885851	1.42168	0.467789	0.414007	0.722808	1.671	2.27531	1.10528	1.14924	0.635577	1.56579	FRMPD1	9
ENSG00000070610	6.59496	6.94854	6.90039	6.79997	6.5683	5.87183	6.36118	6.03407	6.00994	6.19798	6.18635	6.46939	GBA2	9
ENSG00000070614	6.04327	6.74122	6.41009	6.69367	6.47974	5.87183	6.53116	6.23871	6.66559	6.5462	6.48716	6.76851	NDST1	5
ENSG00000070718	4.98727	5.63667	5.47465	4.06199	4.82045	3.38276	4.6602	4.09865	4.47157	4.42519	4.65639	4.25166	AP3M2	8
ENSG00000070729	0.908952	1.43066	1.88947	1.92925	1.49983	2.70671	3.05728	3.24036	2.39512	2.73269	3.52577	2.89181	CNGB1	16
ENSG00000070731	2.83669	1.98823	2.52533	4.0947	2.16672	3.38276	3.35774	3.35311	3.2157	2.70846	3.30114	3.07656	ST6GALNAC2	17
ENSG00000070748	3.15366	4.3576	2.24215	3.43697	3.85414	3.9666	6.12131	3.81347	3.44653	5.17833	4.69545	5.10126	CHAT	10
ENSG00000070756	9.04333	9.39521	8.84464	9.10215	9.6736	9.9909	9.44056	9.45925	9.87382	9.62393	9.79612	9.48763	PABPC1	8
ENSG00000070759	3.732	2.50162	4.35059	4.96016	1.73408	3.66756	3.4956	3.73241	3.47669	3.51198	3.45471	4.03079	TESK2	1
ENSG00000070761	5.20887	4.99759	5.16906	5.3784	5.3768	4.38107	4.68923	5.21357	5.01427	5.40259	6.01169	5.81671	CFAP20	16
ENSG00000070770	6.04327	5.69686	6.46901	6.73748	6.04033	5.91912	5.94297	6.23871	6.04054	6.07778	6.09875	6.16952	CSNK2A2	16
ENSG00000070778	6.42853	5.92538	6.1789	6.55756	5.28138	5.54001	5.65365	6.01706	5.77229	6.05394	5.69457	6.21618	PTPN21	14
ENSG00000070785	3.28936	3.90589	3.09682	3.29407	3.85414	3.84127	3.30245	3.73241	3.68476	3.68342	3.75008	3.45117	EIF2B3	1
ENSG00000070808	2.83669	1.98823	2.40345	3.41986	1.49983	0	3.47908	0.822287	1.10528	2.87012	2.32576	2.06254	CAMK2A	5
ENSG00000070814	6.70828	6.21606	6.21376	6.51389	6.54538	6.32819	6.0049	6.28208	6.09259	6.32495	6.09875	5.84073	TCOF1	5
ENSG00000070831	7.68914	7.7797	7.62185	7.90296	7.98458	8.0537	7.7102	7.74525	7.81492	7.89183	7.85867	7.87795	CDC42	1
ENSG00000070882	3.00386	4.2652	4.62051	4.50479	4.36531	5.76373	5.31019	5.3005	4.88532	4.5868	4.71078	5.35108	OSBPL3	7
ENSG00000070950	3.00386	2.9603	3.77458	3.58244	3.54055	3.13827	3.57552	2.67298	3.53517	3.8254	3.67391	3.67383	RAD18	3
ENSG00000070961	5.69782	6.32687	5.8082	5.98121	5.90283	6.6605	6.88646	6.81237	6.69153	6.45081	6.27925	7.28671	ATP2B1	12
ENSG00000071051	6.73229	6.8775	6.96966	6.23213	6.9068	5.7199	6.55106	6.46884	6.4412	6.47436	6.56091	6.56931	NCK2	2
ENSG00000071054	6.84673	8.24643	7.63409	7.64313	8.12517	7.48286	7.84289	7.63805	7.7631	8.03086	7.55962	7.56993	MAP4K4	2
ENSG00000071073	5.02665	5.72025	5.45637	5.48093	5.95401	6.16123	5.50238	5.38249	6.08527	5.40259	5.59069	6.01674	MGAT4A	2
ENSG00000071082	7.97234	7.76008	6.63797	7.07184	7.85595	7.69243	7.69149	7.91557	7.87347	7.95628	8.24038	7.86588	RPL31	2
ENSG00000071127	7.99734	8.22615	7.8123	8.18955	8.31255	8.36675	7.88584	8.0679	8.1119	8.14473	7.98067	7.97611	WDR1	4
ENSG00000071189	5.06498	5.98453	5.98644	5.89098	5.8033	5.55006	6.17104	6.28208	5.79041	5.95183	5.94844	6.27025	SNX13	7
ENSG00000071205	4.40509	4.60383	4.59846	4.79085	4.6872	5.00983	4.6964	5.24313	5.23763	5.26397	5.33775	5.45478	ARHGAP10	4
ENSG00000071242	5.69782	6.60963	6.32201	5.76794	6.40532	3.9963	5.85283	5.15256	5.97074	6.38161	5.66733	5.27755	RPS6KA2	6
ENSG00000071243	3.91101	4.62877	4.34398	4.21859	4.45549	4.33532	4.04854	4.22255	4.41039	4.51875	4.70313	4.30197	ING3	7
ENSG00000071246	6.82455	7.98676	7.03371	7.76413	8.2517	6.27465	7.41672	6.66725	7.01163	7.40345	7.19288	7.22612	VASH1	14
ENSG00000071282	5.48813	6.0598	5.99912	5.396	6.64218	6.07339	5.42251	5.73439	6.34025	6.64208	5.96452	5.93938	LMCD1	3
ENSG00000071462	5.43058	5.74327	5.50756	5.67727	5.52994	5.6185	5.52671	5.50957	5.58081	5.61956	5.92234	5.74397	BUD23	7
ENSG00000071537	6.92175	7.16003	7.37751	7.30518	7.31933	6.82263	6.88332	6.94421	7.23977	6.97356	6.9104	7.13122	SEL1L	14
ENSG00000071539	2.42986	2.70289	2.52533	2.41698	3.47737	2.29347	1.83585	2.67298	2.98339	1.95562	3.41782	2.43135	TRIP13	5
ENSG00000071553	7.73741	7.02097	7.24007	7.63481	6.79465	7.514	6.90049	7.05671	7.07707	6.76173	6.93508	6.95457	ATP6AP1	X
ENSG00000071564	5.37063	6.01322	5.74938	5.55332	6.02936	5.59928	6.0049	6.22396	5.77836	5.93626	5.88228	5.66927	TCF3	19
ENSG00000071575	6.56852	7.04432	6.52268	5.26323	5.98083	4.51021	5.59733	5.12106	5.35186	5.49404	5.79867	5.47246	TRIB2	2
ENSG00000071626	7.63284	7.48763	7.45548	7.50192	7.17747	6.98328	7.28027	7.17647	7.09297	7.122	6.98322	6.98337	DAZAP1	19
ENSG00000071655	7.65185	6.24053	7.04089	7.42791	6.0834	6.03097	6.26322	6.54202	6.14751	6.31696	6.75456	6.92277	MBD3	19
ENSG00000071794	2.64757	4.0967	4.53603	3.88631	4.35363	4.16271	4.46418	4.09865	4.52305	4.02502	4.94269	4.55525	HLTF	3
ENSG00000071859	7.39778	6.19951	6.59824	6.7716	6.3476	6.76341	6.05594	6.1634	6.14282	6.10589	6.28182	5.94256	FAM50A	X
ENSG00000071889	6.24037	5.52156	5.66437	5.89717	5.46086	4.9197	5.19852	5.43467	5.20197	5.47979	4.8898	4.93268	FAM3A	X
ENSG00000071894	6.83568	6.76953	6.72195	5.97829	6.74634	6.81432	6.87545	6.05088	6.71702	6.86948	6.74342	6.67521	CPSF1	8
ENSG00000071967	4.28031	5.92538	5.16906	5.19448	6.16919	6.57942	6.68501	6.33795	6.47333	6.40253	5.9709	5.86269	CYBRD1	2
ENSG00000071991	2.42986	3.68594	3.27421	2.1528	3.64006	0	1.671	3.11804	2.15517	2.3806	2.79717	2.01507	CDH19	18
ENSG00000071994	5.27576	5.01661	5.30802	4.70872	5.04766	4.9197	4.75249	4.8789	4.56576	4.79677	4.38737	4.49165	PDCD2	6
ENSG00000072041	2.17336	2.87949	2.87632	1.34025	3.08382	1.39286	4.1249	1.72448	3.1977	2.77997	2.95997	2.19623	SLC6A15	12
ENSG00000072042	5.59678	4.57846	4.5817	4.48025	4.854	5.44628	4.68923	4.16193	4.56576	4.54636	4.46174	4.34099	RDH11	14
ENSG00000072062	5.76921	6.37924	5.87622	5.98703	6.57586	6.68806	6.16071	6.05088	6.43161	6.37007	6.10747	6.11287	PRKACA	19
ENSG00000072071	4.77244	5.77712	5.20234	3.74236	4.66846	2.38613	4.61553	3.45768	4.02801	4.6956	4.85573	4.66696	ADGRL1	19
ENSG00000072110	7.28051	8.01776	7.52215	7.91674	8.28591	7.8016	7.01384	7.83535	8.22003	8.01674	7.94222	7.64834	ACTN1	14
ENSG00000072121	5.59678	5.59931	5.76183	5.48505	5.20544	5.83943	5.67195	5.24313	5.77533	5.22606	5.04904	5.60861	ZFYVE26	14
ENSG00000072133	3.00386	1.98823	3.36843	2.85907	1.22004	0.406205	2.0746	1.34279	1.61943	1.28654	1.55457	1.99074	RPS6KA6	X
ENSG00000072134	5.94392	6.81369	6.08687	6.20492	6.37963	5.29914	6.41648	5.94693	5.86926	6.41382	6.14463	6.27151	EPN2	17
ENSG00000072135	6.27348	6.27253	5.83909	5.75094	6.31786	7.17404	6.65773	6.22396	6.34843	5.95955	5.63957	5.64024	PTPN18	2
ENSG00000072163	6.27348	6.6221	6.34702	5.31966	5.24391	4.40341	5.3195	5.48503	5.40379	5.59664	4.71078	4.78486	LIMS2	2
ENSG00000072195	5.40091	6.35703	5.08036	4.58372	5.57591	5.23829	6.39461	5.83489	5.25514	6.39686	5.50974	5.18943	SPEG	2
ENSG00000072201	6.02394	5.67309	6.08092	5.67366	6.09747	4.16271	4.50557	5.48503	5.21545	5.02977	5.69457	5.28508	LNX1	4
ENSG00000072210	4.57408	5.43938	4.61503	5.01815	5.31188	5.6185	5.38751	5.43467	5.31895	5.51515	5.33775	5.31723	ALDH3A2	17
ENSG00000072274	8.88092	7.52795	8.42381	9.91493	8.49772	8.08687	8.2164	8.64	8.71384	8.89585	8.54193	9.63278	TFRC	3
ENSG00000072310	7.07047	6.30383	6.93049	7.35778	5.40536	6.23783	5.88455	5.96478	5.65192	5.23457	5.14244	5.91858	SREBF1	17
ENSG00000072364	6.70828	5.90511	6.44295	6.56342	6.27515	6.10099	5.94598	6.25331	6.69314	5.98751	6.70757	6.79598	AFF4	5
ENSG00000072401	3.41339	3.68594	3.55173	4.02853	4.1925	4.98041	3.89502	4.16193	3.97618	4.01518	3.94416	4.47858	UBE2D1	10
ENSG00000072415	6.27348	4.76996	6.52561	6.96533	5.09051	4.84004	5.36069	5.58077	5.20648	5.22178	5.51848	5.62451	MPP5	14
ENSG00000072422	7.94177	7.10334	8.19361	8.10711	6.27205	6.55468	7.1545	7.03996	6.61395	6.96591	6.84069	7.3944	RHOBTB1	10
ENSG00000072501	6.50022	6.76391	7.15292	7.37119	6.94622	6.95709	6.99217	7.35632	6.97777	7.12658	7.30823	6.47049	SMC1A	X
ENSG00000072506	5.17422	4.83569	5.07638	5.28701	5.01095	5.5197	4.61553	5.3005	5.24641	5.39122	5.49211	4.74541	HSD17B10	X
ENSG00000072518	6.74415	5.79926	6.54879	7.13348	6.22795	6.47253	6.38799	6.10018	6.0581	6.24085	6.38097	6.42468	MARK2	11
ENSG00000072571	3.732	2.50162	3.49318	3.59773	4.45549	3.70401	1.83585	4.8789	4.63425	3.55339	4.77051	3.46006	HMMR	5
ENSG00000072609	6.18923	6.03203	6.08092	6.24189	6.21187	6.44048	5.91252	5.32835	6.04558	5.73503	5.52717	5.91373	CHFR	12
ENSG00000072682	4.72535	6.01322	5.02358	4.45527	5.88672	5.4991	4.89013	4.95234	4.88532	5.11981	5.39106	5.38415	P4HA2	5
ENSG00000072694	7.37508	8.23429	7.8057	2.06749	4.46638	4.66617	2.9414	2.27531	3.74794	3.4837	5.3719	4.02481	FCGR2B	1
ENSG00000072736	3.99282	5.29107	4.67421	4.70166	4.72395	5.23829	4.47256	4.09865	4.87404	4.59344	4.92965	4.73812	NFATC3	16
ENSG00000072756	4.40509	4.02338	4.71064	4.13719	4.26911	3.9666	4.45576	3.81347	4.06817	4.14726	4.10363	4.32648	TRNT1	3
ENSG00000072778	10.0444	8.70786	9.67761	10.0743	9.18694	9.07206	9.26096	9.40469	9.34772	9.25027	9.60835	9.59456	ACADVL	17
ENSG00000072786	6.52793	6.64672	6.79405	7.09896	7.0869	7.1211	6.76218	6.53008	6.95385	6.70007	6.68641	6.56003	STK10	5
ENSG00000072803	4.94679	4.8779	5.30121	5.34254	5.38829	5.48869	5.24325	5.08886	5.43868	5.23457	5.30782	5.29007	FBXW11	5
ENSG00000072818	2.17336	2.13469	1.14573	2.02287	3.4113	6.15466	2.27939	2.02603	3.53517	2.21844	1.16704	1.14848	ACAP1	17
ENSG00000072832	3.63341	3.53583	3.11247	2.38208	3.64006	0.406205	2.9414	2.27531	3.36826	2.91317	2.82561	2.58554	CRMP1	4
ENSG00000072840	3.28936	3.82189	2.85788	3.76963	3.38859	4.0819	4.21749	2.27531	3.95491	4.48348	4.28867	4.54693	EVC	4
ENSG00000072849	4.77244	4.7922	4.9816	5.23417	4.83732	5.25067	4.89637	4.33665	4.89652	4.72005	4.78507	4.73079	DERL2	17
ENSG00000072858	2.17336	1.18382	1.37055	1.47886	1.87147	2.90764	1.48485	2.02603	2.33053	1.82646	1.48495	2.37607	SIDT1	3
ENSG00000072864	3.82428	4.20015	4.03479	4.16825	4.7861	4.68453	4.42157	5.12106	4.90208	4.65179	4.90321	4.31182	NDE1	16
ENSG00000072952	4.77244	6.77512	5.34821	4.06199	5.0035	4.68453	4.71769	5.02221	4.71868	4.94415	4.63244	4.09498	IRAG1	11
ENSG00000072958	5.13872	5.91528	5.28749	5.71983	5.95014	6.20004	5.77371	5.79552	5.8974	5.79092	5.69457	5.63043	AP1M1	19
ENSG00000073008	3.732	5.10812	4.50673	4.70166	5.04766	5.52989	3.9797	4.16193	5.77836	4.53262	4.59162	4.92628	PVR	19
ENSG00000073050	5.17422	4.2652	5.1196	5.08479	4.87866	4.93512	4.87757	5.43467	4.70601	4.67073	4.96843	4.68603	XRCC1	19
ENSG00000073060	8.4669	9.75579	9.18815	8.30934	8.21667	5.92685	6.73459	6.75196	7.27452	6.93622	7.95997	8.0651	SCARB1	12
ENSG00000073067	0.908952	1.43066	1.26252	1.1869	1.11326	0.722808	2.42457	2.27531	1.32009	2.73269	2.61363	2.69501	CYP2W1	7
ENSG00000073111	6.24037	5.94536	6.1182	6.40726	6.37096	5.91912	5.95497	6.74164	6.50477	6.23662	7.02521	6.76762	MCM2	3
ENSG00000073146	0	1.18382	1.37055	0.595171	2.36591	2.55531	1.19214	1.72448	1.82093	1.52723	1.25332	1.23389	MOV10L1	22
ENSG00000073150	0	1.64138	0.725026	0.467789	0.735317	2.19445	1.78297	0.822287	1.38514	1.63402	1.41179	0.909811	PANX2	22
ENSG00000073169	5.13872	5.43938	5.16906	5.16911	4.76862	5.00983	5.25786	4.8789	5.13737	5.06837	4.87627	4.85056	SELENOO	22
ENSG00000073282	4.14372	5.3066	4.82425	5.65185	4.87049	4.48947	6.05036	5.62635	5.60149	5.81097	6.08705	6.24347	TP63	3
ENSG00000073331	4.62629	4.99759	4.9207	4.81722	4.95021	5.95738	5.34253	4.39049	5.20197	4.81391	4.79948	4.54275	ALPK1	4
ENSG00000073350	5.17422	5.01661	4.79546	5.39162	4.92675	4.88836	4.79985	5.35568	5.09425	5.46178	4.48867	4.87403	LLGL2	17
ENSG00000073417	5.43058	5.79926	5.88762	5.73719	5.59587	5.36892	5.31019	5.18339	5.7662	5.49049	5.79148	5.55982	PDE8A	15
ENSG00000073464	0.908952	1.64138	2.0279	1.77635	1.80441	1.39286	2.98887	1.72448	1.6725	1.73345	1.68448	2.17479	CLCN4	X
ENSG00000073536	3.732	4.55263	3.71434	3.00386	3.73315	3.28988	4.22742	3.9631	3.17948	3.91284	3.73516	3.47768	NLE1	17
ENSG00000073578	0.908952	2.87949	2.35167	3.0929	1.93555	2.55531	1.98379	2.67298	1.77313	2.11161	2.58064	2.58554	SDHA	5
ENSG00000073584	2.64757	2.70289	3.44457	3.4871	2.83775	2.633	2.96533	3.11804	2.51621	2.65873	2.70832	2.89181	SMARCE1	17
ENSG00000073605	4.72535	4.16648	5.16906	4.53688	4.16603	4.42541	4.85213	3.64652	4.20055	3.95465	4.4435	4.44315	GSDMB	17
ENSG00000073614	5.88086	6.28042	6.23893	6.38319	6.17252	6.57451	6.44655	6.28208	6.40048	6.24928	6.69607	6.38905	KDM5A	12
ENSG00000073670	0	0.509876	1.20531	1.1869	0.583589	1.20212	2.24069	2.02603	1.18049	1.63402	1.33473	0.802068	ADAM11	17
ENSG00000073711	4.46365	2.38937	4.20497	4.79749	2.41169	2.77685	3.39346	3.81347	3.64548	3.85881	3.50833	3.85324	PPP2R3A	3
ENSG00000073712	7.07047	7.6848	7.79119	7.3723	7.59084	6.44587	7.2886	7.29412	7.61591	7.42591	7.91353	7.70131	FERMT2	14
ENSG00000073737	1.86118	2.13469	1.08359	1.10364	1.80441	3.9963	1.10864	0	1.8672	1.28654	0.758686	1.35321	DHRS9	2
ENSG00000073754	0	0	0.128657	1.34025	2.16672	4.8069	3.83133	0	2.42635	2.03572	0.758686	2.66457	CD5L	1
ENSG00000073756	3.15366	3.10948	2.52533	2.34631	5.3768	4.10934	1.41705	3.35311	4.78043	4.63903	3.17418	2.7395	PTGS2	1
ENSG00000073792	6.68385	4.85695	6.24071	7.14263	5.34175	5.40258	5.08295	6.20906	5.18381	6.04187	5.57402	4.95172	IGF2BP2	3
ENSG00000073803	3.52759	4.2652	4.51264	4.81722	3.88692	4.75572	3.94402	4.22255	4.49386	4.25993	4.71838	4.44763	MAP3K13	3
ENSG00000073849	3.99282	5.85315	5.28058	5.4263	6.15244	6.23783	5.87511	5.55742	6.03295	5.94147	5.1593	5.29256	ST6GAL1	3
ENSG00000073910	4.21363	4.57846	4.42765	3.53556	4.05502	3.28988	3.73716	3.81347	3.78456	3.4837	3.60994	3.28101	FRY	13
ENSG00000073921	7.60709	7.75443	8.22723	8.39171	8.0736	7.62749	7.93364	7.7504	8.07726	7.82225	7.78001	7.97495	PICALM	11
ENSG00000073969	5.06498	4.06051	4.45245	4.75719	5.12528	4.90412	4.65285	5.02221	4.95124	4.87506	4.79948	4.8267	NSF	17
ENSG00000074047	0.908952	3.63761	2.18412	2.19363	2.21915	3.13827	3.751	3.45768	2.78076	3.81409	2.58064	2.87861	GLI2	2
ENSG00000074054	5.67321	5.79926	6.11626	5.86593	5.88266	5.43548	5.82366	5.69214	6.02532	5.68623	6.13614	6.15728	CLASP1	2
ENSG00000074071	5.72201	5.10812	4.5817	4.41267	4.48791	5.16172	4.44729	4.54089	4.58665	4.67699	4.91649	4.68223	MRPS34	16
ENSG00000074181	8.76637	9.88365	9.4309	8.26872	8.36439	6.63712	8.58073	7.91098	7.82081	8.23127	8.2117	8.29487	NOTCH3	19
ENSG00000074201	4.34405	4.72441	5.04003	5.00099	5.01095	5.28717	5.22354	5.2721	4.99877	5.3009	4.92965	5.15426	CLNS1A	11
ENSG00000074219	5.43058	5.39647	5.04003	3.78307	5.07637	3.28988	4.37765	4.33665	4.33008	4.34099	4.30896	4.01881	TEAD2	19
ENSG00000074266	3.99282	4.60383	4.51852	4.35083	4.25662	4.62873	4.82622	4.39049	4.4413	4.61315	4.61626	4.70858	EED	11
ENSG00000074319	6.18923	6.09602	6.08885	6.23213	5.85807	5.93454	5.8656	6.0675	5.88339	6.00254	5.67907	6.13108	TSG101	11
ENSG00000074356	6.52793	6.80824	6.75472	6.41591	6.34465	6.26858	6.79427	6.33795	6.41613	6.49044	6.49825	6.74688	NCBP3	17
ENSG00000074370	3.82428	4.52633	3.85117	3.29407	4.20555	5.83121	3.55989	4.58774	4.37079	3.56693	2.51229	2.91785	ATP2A3	17
ENSG00000074410	0.908952	0	1.01866	1.01529	1.93555	4.88836	2.55647	2.67298	2.07859	4.02502	1.33473	0.856945	CA12	15
ENSG00000074416	6.87936	7.16856	6.78065	6.89279	7.29511	7.00171	6.74673	6.22396	7.15256	7.07301	7.23986	7.31394	MGLL	3
ENSG00000074527	4.94679	5.19416	5.19133	4.1161	3.83747	5.46764	4.80649	3.64652	4.9831	4.63903	4.64845	5.56189	NTN4	12
ENSG00000074582	4.51992	4.7922	4.73611	4.39527	4.69647	4.42541	4.83923	4.9877	4.06817	4.37987	4.93619	4.37898	BCS1L	2
ENSG00000074590	3.52759	4.02338	3.39426	4.1886	3.87063	3.90529	4.2568	4.67709	5.09911	5.09665	4.19367	4.67079	NUAK1	12
ENSG00000074603	5.06498	5.53482	5.64298	5.68445	5.75529	5.58957	5.59733	4.91609	5.72283	5.61631	5.41465	5.58035	DPP8	15
ENSG00000074621	4.72535	4.76996	4.72597	4.58372	4.06937	4.16271	4.54581	4.58774	4.37079	4.37987	4.71078	4.74177	SLC24A1	15
ENSG00000074657	5.51607	6.80278	6.23714	6.69367	6.9751	5.457	7.18029	6.46884	6.69153	7.07656	6.94969	6.78275	ZNF532	18
ENSG00000074660	5.54348	6.34203	6.12978	5.11167	5.71477	5.39145	5.50238	4.71978	5.26813	5.03952	5.10232	4.9705	SCARF1	17
ENSG00000074695	7.26413	6.60335	7.27611	7.23355	7.033	6.59406	6.76388	7.10581	7.04849	6.82227	6.98794	7.25769	LMAN1	18
ENSG00000074696	6.27348	6.03203	6.38777	7.00745	6.16251	6.19364	6.26563	6.74164	6.22728	6.61626	6.36652	6.79861	HACD3	15
ENSG00000074706	2.17336	2.38937	2.50177	1.77635	2.4991	2.96885	2.16004	0.822287	2.07859	2.11161	2.11148	1.91518	IPCEF1	6
ENSG00000074755	6.54159	6.44389	6.49012	6.77832	5.95401	6.14806	6.05315	6.29625	6.21168	5.90461	6.06635	6.17223	ZZEF1	17
ENSG00000074800	8.13883	8.47675	8.08629	8.45554	9.02148	9.63386	8.202	8.82487	8.75094	8.88507	8.89132	8.60597	ENO1	1
ENSG00000074842	6.86856	6.81369	6.4274	6.28976	6.21832	6.67893	5.8367	6.6003	6.24491	6.16274	6.15867	6.20168	MYDGF	19
ENSG00000074855	5.72201	5.49469	5.21688	4.9059	5.26277	5.00983	5.15235	5.43467	4.9831	5.09665	5.27726	5.18943	ANO8	19
ENSG00000074935	4.07024	5.12574	4.12239	4.89356	6.04397	3.42705	5.55852	4.39049	4.82799	5.31702	5.47425	5.60661	TUBE1	6
ENSG00000074964	5.20887	4.85695	5.15402	5.05739	5.13213	6.24403	5.55852	5.60374	5.41552	5.24303	4.67214	5.24191	ARHGEF10L	1
ENSG00000074966	3.82428	0.885851	3.91501	4.50479	1.66014	2.55531	2.24069	2.83707	1.77313	1.73345	0.872111	1.05769	TXK	4
ENSG00000075035	0	1.43066	0.641227	1.01529	1.73408	0.982281	2.11795	1.72448	0.655995	1.07536	1.33473	0.491186	WSCD2	12
ENSG00000075089	4.67667	4.20015	4.46469	4.44685	4.47719	4.28807	4.2856	3.89022	4.35464	4.37218	4.53246	4.4742	ACTR6	12
ENSG00000075131	1.46224	1.98823	1.85269	1.97682	2.36591	1.39286	1.671	2.67298	2.19199	2.28551	2.95997	1.86251	TIPIN	15
ENSG00000075142	5.17422	4.95879	5.33827	5.57666	4.996	5.44628	4.93324	4.44238	5.19292	5.1426	4.86945	4.83356	SRI	7
ENSG00000075151	5.43058	6.50577	5.9499	5.81122	6.40532	6.3628	6.38577	6.11625	6.55863	6.08721	5.85495	5.95676	EIF4G3	1
ENSG00000075188	3.52759	3.36827	3.48118	3.72853	3.78625	3.59176	3.68046	3.89022	3.64548	3.68342	4.20454	3.79119	NUP37	12
ENSG00000075213	3.91101	4.65328	4.49484	2.85907	4.87866	4.46843	3.93192	3.11804	5.18381	3.96492	4.35846	4.27199	SEMA3A	7
ENSG00000075218	3.28936	2.9603	3.09682	3.45387	3.75107	3.73957	2.42457	3.89022	4.21851	3.26851	4.61626	2.96857	GTSE1	22
ENSG00000075223	3.00386	2.9603	3.81338	4.00578	3.05526	4.40341	3.16454	3.9631	4.97256	3.26851	3.73516	3.33999	SEMA3C	7
ENSG00000075234	3.732	4.8779	4.29684	3.82266	4.74198	5.29914	4.87126	4.39049	4.62081	4.40271	4.3778	4.57175	TTC38	22
ENSG00000075239	3.99282	4.72441	4.65831	3.99427	4.6872	5.14856	4.49739	4.28073	4.47157	4.44733	4.319	4.13438	ACAT1	11
ENSG00000075240	4.46365	5.25948	5.1728	5.31041	4.95021	5.5197	5.41384	4.76123	5.27672	5.58004	5.11965	5.56601	GRAMD4	22
ENSG00000075275	1.46224	2.13469	1.77618	2.27199	2.41169	3.08398	1.5496	1.34279	2.82831	3.26851	3.08288	3.42417	CELSR1	22
ENSG00000075292	6.38374	6.91852	7.20127	7.03299	6.79033	7.31329	6.98194	6.85128	6.84968	6.91387	6.85456	6.85867	ZNF638	2
ENSG00000075303	3.00386	2.9603	3.35534	3.27517	3.71501	3.42705	3.52811	2.67298	3.56355	3.23497	3.75008	3.55439	SLC25A40	7
ENSG00000075336	4.67667	4.44443	4.66363	4.06199	4.26911	4.18867	4.33236	4.71978	3.59138	3.94431	4.28867	4.03675	TIMM21	18
ENSG00000075340	0	0	0.128657	1.47886	0.872596	2.70671	0.925573	0.822287	1.56432	0.734955	1.80365	0.623679	ADD2	2
ENSG00000075391	6.48616	5.97484	6.76713	6.9128	5.70561	5.56004	5.47346	5.98242	6.11193	5.48337	5.63556	6.05538	RASAL2	1
ENSG00000075399	5.67321	4.89855	5.135	4.96607	4.63025	5.55006	4.60795	4.49248	4.72498	4.67073	4.1152	4.30197	VPS9D1	16
ENSG00000075407	4.21363	4.91891	4.83372	4.17846	4.996	4.87244	5.11539	3.9631	4.9296	4.72005	4.33886	4.40683	ZNF37A	10
ENSG00000075413	6.86856	6.76391	6.73843	6.85032	6.87855	6.64652	6.91285	6.87035	6.68347	6.59988	6.88697	6.76224	MARK3	14
ENSG00000075415	7.70743	7.48079	7.43074	7.70092	7.68356	7.42671	7.43611	7.94285	7.79262	7.71153	8.25352	8.01433	SLC25A3	12
ENSG00000075420	7.7195	7.41423	7.60674	8.06303	7.68356	7.65568	7.48453	7.47942	8.07849	7.71837	7.66667	8.02223	FNDC3B	3
ENSG00000075426	6.56852	7.65172	6.75845	7.46382	7.93351	7.65102	7.60844	7.70863	8.652	8.06406	7.99404	7.98884	FOSL2	2
ENSG00000075461	3.00386	2.50162	1.65322	3.97097	2.45606	2.55531	1.671	0.822287	1.18049	2.25236	1.62098	2.13093	CACNG4	17
ENSG00000075539	4.94679	5.88455	5.47465	5.28229	5.63981	5.58957	5.62764	5.38249	5.66834	5.6325	5.8376	6.01372	FRYL	4
ENSG00000075568	6.50022	6.19951	6.75097	6.86778	6.45808	6.73726	6.63739	6.35159	6.64249	6.47615	6.40473	6.57033	TMEM131	2
ENSG00000075618	7.2392	7.98676	7.38236	7.55479	8.47432	7.29847	7.93893	7.93382	7.73765	8.09185	7.45427	7.6905	FSCN1	7
ENSG00000075624	11.0669	11.4926	10.6384	11.2085	12.0319	12.2808	10.8605	11.4769	11.5084	11.6273	11.184	11.0262	ACTB	7
ENSG00000075643	4.40509	1.64138	3.36843	3.9232	1.11326	1.39286	1.78297	2.83707	2.22789	1.82646	1.07527	0.685626	MOCOS	18
ENSG00000075651	3.15366	5.16036	4.19765	4.72969	5.65417	6.05939	5.88455	5.21357	5.91126	5.47262	5.21411	5.58239	PLD1	3
ENSG00000075673	2.64757	0	3.28805	0.467789	0.414007	0	1.5496	0	0	0.413781	0.635577	4.08352	ATP12A	13
ENSG00000075702	1.86118	1.64138	2.65918	2.78083	3.11183	3.1906	1.671	3.11804	3.26836	2.49836	3.45471	2.55267	WDR62	19
ENSG00000075711	6.62092	6.09602	6.38133	6.75293	6.00717	6.14806	6.40995	6.26777	6.08037	6.23238	6.43042	6.6138	DLG1	3
ENSG00000075785	8.11162	8.191	8.0318	8.23549	7.94621	8.18363	7.85415	8.2019	8.0272	7.95112	7.75342	7.73237	RAB7A	3
ENSG00000075826	3.28936	4.29666	4.47683	4.53688	4.08358	4.53065	4.8131	3.81347	3.64548	3.80268	4.1152	4.38366	SEC31B	10
ENSG00000075856	6.24037	6.12259	6.3304	6.46677	6.02936	6.20004	6.2216	6.40488	6.14047	6.15603	5.97725	6.05391	SART3	12
ENSG00000075884	2.42986	1.98823	1.92534	1.54347	3.11183	3.93627	2.706	2.98438	2.87435	2.07416	2.01599	1.91518	ARHGAP15	2
ENSG00000075914	3.52759	3.8645	3.71434	3.62784	3.80353	3.51175	3.81825	3.64652	3.74794	3.70807	3.86416	3.79119	EXOSC7	3
ENSG00000075945	5.64818	4.55263	4.55905	4.56827	4.75092	4.60964	4.77974	4.91609	4.7437	4.70175	4.97479	4.67079	KIFAP3	1
ENSG00000075975	5.27576	5.12574	5.08433	5.18944	4.95021	5.34603	5.21358	5.02221	5.11837	5.19587	5.11965	5.18943	MKRN2	3
ENSG00000076003	4.90513	4.89855	5.15402	5.59202	6.02569	5.457	5.13663	6.31029	5.90296	5.74698	6.13897	5.72933	MCM6	2
ENSG00000076043	4.94679	4.06051	4.68471	4.9423	4.06937	4.51021	4.35065	4.39049	4.28818	4.70175	4.61626	4.54275	REXO2	11
ENSG00000076053	4.21363	3.63761	4.10685	4.06199	4.06937	4.0254	3.69484	3.9631	3.96558	4.22619	4.42504	4.35058	RBM7	11
ENSG00000076067	7.02258	7.1122	7.22575	6.88502	6.51425	5.79787	6.60918	6.13214	6.28806	6.39116	6.72655	6.69134	RBMS2	12
ENSG00000076108	8.01702	8.07332	8.13976	8.28593	7.62039	7.85729	8.20514	8.09247	7.99109	7.97862	7.96157	8.06474	BAZ2A	12
ENSG00000076201	7.00297	6.6283	6.8685	7.27814	6.92665	6.72401	6.68321	6.57727	6.67862	6.63084	6.54817	6.6008	PTPN23	3
ENSG00000076242	5.2427	4.83569	5.04411	5.24392	5.42782	5.20052	5.26751	5.55742	5.39592	5.20888	5.63154	5.3606	MLH1	3
ENSG00000076248	3.82428	4.65328	4.81472	4.9059	4.81194	4.48947	4.60032	5.15256	5.19745	4.55318	5.50974	5.23157	UNG	12
ENSG00000076258	0.908952	2.38937	2.50177	2.80739	2.05576	2.4732	2.96533	2.48781	2.42635	2.55382	2.28538	2.39473	FMO4	1
ENSG00000076321	4.67667	4.81411	4.91625	4.69456	4.59099	4.05393	4.71063	4.80153	4.60724	4.60004	4.94269	4.67079	KLHL20	1
ENSG00000076344	4.67667	5.35223	4.99432	3.9232	4.57096	3.02756	5.5858	3.9631	4.70601	4.80822	4.42504	4.38366	RGS11	16
ENSG00000076351	4.90513	5.36713	5.30802	5.75435	5.06925	5.88777	6.1372	5.53369	5.80237	5.80527	5.67517	6.06123	SLC46A1	17
ENSG00000076356	6.64642	7.29077	7.03884	6.74265	6.67305	5.64687	6.44016	6.29625	6.56917	6.43058	6.4715	6.67139	PLXNA2	1
ENSG00000076382	3.82428	3.58762	4.00157	3.70047	4.28149	3.87364	2.9414	4.63311	4.7437	3.51198	5.0965	3.4864	SPAG5	17
ENSG00000076513	7.15286	6.29607	7.41269	7.69471	6.25332	6.71956	6.71531	6.90776	6.49744	6.63567	6.31479	6.77208	ANKRD13A	12
ENSG00000076554	4.51992	4.74736	5.33827	5.56892	5.14574	4.35838	5.17305	4.8789	4.61404	4.61966	4.73347	5.09557	TPD52	8
ENSG00000076555	3.91101	5.3066	4.75118	4.58372	4.59099	3.38276	4.94532	4.09865	4.71868	4.53262	4.89652	4.66696	ACACB	12
ENSG00000076604	6.47197	5.69686	6.08489	6.47093	6.13889	5.58957	5.96094	6.17878	6.08282	6.13345	6.90874	6.89189	TRAF4	17
ENSG00000076641	6.22352	6.42266	6.83235	5.94579	6.9048	6.05234	5.8171	6.01706	6.06556	6.01	6.13614	5.42558	PAG1	8
ENSG00000076650	4.07024	3.8645	4.26219	4.58372	4.11159	3.93627	4.68203	4.16193	4.35464	4.20902	4.32896	4.19953	GPATCH1	19
ENSG00000076662	1.86118	2.70289	2.18412	1.72156	2.83775	4.48947	2.16004	1.72448	3.04507	2.60723	2.24383	1.9408	ICAM3	19
ENSG00000076685	6.02394	6.34203	6.49161	6.64481	6.33281	6.38543	6.41431	6.22396	6.07298	6.21743	5.90245	6.20829	NT5C2	10
ENSG00000076706	8.07452	9.07744	8.50384	8.51967	8.86419	6.76772	7.88506	7.36307	8.47797	8.13738	8.00341	8.08104	MCAM	11
ENSG00000076716	5.43058	6.02266	6.62302	5.02947	6.1956	4.62873	5.18838	4.63311	5.56335	5.05401	5.68684	4.71602	GPC4	X
ENSG00000076770	8.56043	8.7638	8.65837	9.13266	8.70554	8.7545	9.1007	9.12598	9.19284	9.0895	9.08537	9.47755	MBNL3	X
ENSG00000076826	4.34405	2.60576	3.87888	3.40255	2.45606	2.4732	2.35381	3.35311	3.0248	3.1294	3.543	3.5037	CAMSAP3	19
ENSG00000076864	6.80204	2.9603	5.52812	5.90026	2.58153	1.39286	3.37571	4.44238	1.6725	2.80304	2.44055	2.06254	RAP1GAP	1
ENSG00000076924	6.20648	5.69686	6.07494	6.1949	5.67309	5.7199	5.72898	6.08394	5.57385	5.93103	5.93871	5.91049	XAB2	19
ENSG00000076928	7.19668	7.61788	7.0203	6.96827	7.44986	8.05899	7.34213	6.97977	7.25399	7.25657	6.78384	6.87787	ARHGEF1	19
ENSG00000076944	6.48616	5.43938	5.51934	5.90948	5.49315	6.15466	5.66466	5.64862	5.67811	5.68933	5.75498	5.73301	STXBP2	19
ENSG00000076984	6.84673	6.16583	6.4946	6.86304	5.93846	6.00198	6.12131	6.32419	6.08037	6.01	6.05137	5.94256	MAP2K7	19
ENSG00000077044	6.28976	7.20217	6.51682	6.74609	6.99591	5.17477	6.51706	6.46884	6.67374	6.49221	6.81432	6.40064	DGKD	2
ENSG00000077063	0.908952	2.87949	2.12364	1.10364	2.16672	3.1906	3.63642	1.72448	3.723	2.46981	2.79717	2.67987	CTTNBP2	7
ENSG00000077092	4.07024	4.65328	4.63683	2.88423	4.51962	3.47002	4.50557	3.9631	3.65869	3.86978	3.85038	3.47768	RARB	3
ENSG00000077097	6.85769	7.14714	7.49257	7.63666	7.62039	7.1934	7.41454	7.59857	7.36698	7.56316	7.60237	7.59031	TOP2B	3
ENSG00000077147	7.96729	7.40343	8.03847	8.11045	7.67655	7.14118	7.52435	7.44803	7.50048	7.49484	7.57016	7.77307	TM9SF3	10
ENSG00000077150	5.90219	6.44389	5.93238	5.97244	7.53893	6.87153	5.67558	6.10018	6.43161	6.10357	6.54604	6.06561	NFKB2	10
ENSG00000077152	2.42986	2.38937	3.11247	2.6402	3.11183	1.39286	1.78297	3.73241	3.1234	2.73269	3.96987	2.13093	UBE2T	1
ENSG00000077157	6.84673	7.38525	7.50151	6.50378	6.30275	5.64687	6.61676	6.14785	6.28381	6.50106	6.27667	6.7286	PPP1R12B	1
ENSG00000077232	6.11809	6.49903	6.42113	6.18986	6.84766	6.09414	6.19401	5.87321	6.24052	6.19798	6.09291	6.23443	DNAJC10	2
ENSG00000077235	6.22352	6.58436	6.56593	6.6631	6.30881	5.98727	6.56679	6.44359	6.43161	6.44349	6.22423	6.54026	GTF3C1	16
ENSG00000077238	6.54159	7.46357	7.00676	6.56536	7.72721	7.34538	6.73633	6.61167	6.96851	6.68307	6.29713	6.39137	IL4R	16
ENSG00000077254	6.1541	5.89487	6.29998	6.76145	6.0834	6.3628	6.17874	6.20906	6.14751	6.12203	5.96452	6.12969	USP33	1
ENSG00000077264	3.15366	1.43066	3.55173	3.17676	0.872596	1.97334	0.329964	0.822287	1.91202	0.734955	0.872111	0.420078	PAK3	X
ENSG00000077274	9.37618	7.30244	9.41778	10.0926	7.40246	6.55468	5.78384	8.09247	7.25508	6.99876	7.69006	7.00099	CAPN6	X
ENSG00000077312	5.17422	5.05391	5.62946	5.40907	5.41101	4.93512	4.86491	5.24313	5.03975	4.98507	5.70609	4.90365	SNRPA	19
ENSG00000077348	3.63341	4.06051	2.85788	3.02664	3.05526	3.33707	3.03483	3.89022	2.68068	3.14754	3.45471	2.82456	EXOSC5	19
ENSG00000077380	6.75592	7.04895	6.76959	7.09627	7.44574	7.20617	7.10419	7.25838	6.97513	7.18812	7.01906	6.87869	DYNC1I2	2
ENSG00000077420	3.63341	4.32745	3.12795	3.75606	5.24391	6.60856	5.00427	4.67709	5.3231	4.77942	3.75008	3.33999	APBB1IP	10
ENSG00000077454	4.57408	4.23304	4.5008	4.91203	4.21849	4.38107	4.36871	4.44238	4.47157	4.32514	4.82083	4.21537	LRCH4	7
ENSG00000077458	5.20887	4.91891	5.01943	5.36058	4.89487	4.8069	5.01578	5.15256	4.87969	4.99513	5.48766	4.86402	FAM76B	11
ENSG00000077463	4.81804	5.03538	4.57042	4.56827	4.36531	4.28807	3.95601	3.45768	3.85514	3.96492	4.32896	3.94474	SIRT6	19
ENSG00000077514	4.14372	4.60383	4.41509	4.65124	4.76862	4.44708	4.48916	4.63311	4.87969	4.38753	4.79229	4.36958	POLD3	11
ENSG00000077549	7.86238	8.07104	7.82896	8.07332	8.19147	8.50876	8.11307	8.12459	8.28857	8.17434	7.89351	7.9699	CAPZB	1
ENSG00000077585	3.732	4.13201	4.2481	4.48025	5.35353	5.57979	4.92105	4.49248	5.15146	5.03465	4.82083	4.90365	GPR137B	1
ENSG00000077616	4.40509	3.48211	4.97306	5.10633	4.05502	2.90764	4.20749	4.03247	4.46406	3.9339	3.76484	5.63043	NAALAD2	11
ENSG00000077684	5.17422	5.07221	4.96446	4.84312	5.26277	4.96547	4.83923	5.38249	5.47275	5.44721	5.6634	5.14326	JADE1	4
ENSG00000077713	4.21363	3.82189	4.12239	3.68624	3.60108	4.28807	3.84429	4.09865	3.79657	4.25157	3.79392	3.98841	SLC25A43	X
ENSG00000077721	6.39882	5.78823	6.82643	7.12822	6.0146	6.43507	6.09985	6.48129	6.44882	6.25347	7.06153	6.89599	UBE2A	X
ENSG00000077782	6.86856	7.88694	7.60259	7.16847	7.77397	7.18698	7.49279	7.19927	7.60827	7.7214	7.5575	7.54142	FGFR1	8
ENSG00000077935	0	0.509876	0.8793	0.712212	1.31945	1.39286	0.925573	0.822287	1.38514	1.58161	1.85973	1.66138	SMC1B	22
ENSG00000077942	11.7112	9.59506	11.2806	11.7759	9.51191	9.87277	10.0378	10.4312	9.89979	9.86345	9.76639	10.3871	FBLN1	22
ENSG00000077984	0	1.43066	0.45744	0.595171	2.80382	3.47002	0.329964	0.822287	2.03871	1.82646	0.500975	0.345282	CST7	20
ENSG00000078018	1.46224	0	2.42867	1.34025	1.58221	0.982281	1.10864	2.67298	2.36319	1.87081	2.11148	0.856945	MAP2	2
ENSG00000078043	3.41339	4.32745	3.88799	3.79638	4.21849	4.51021	4.87126	3.89022	4.37079	4.24316	3.59349	3.94474	PIAS2	18
ENSG00000078061	6.09975	6.28826	6.33374	6.43945	6.09397	6.08034	5.79724	5.64862	6.11673	6.00503	6.19999	5.91858	ARAF	X
ENSG00000078070	4.07024	2.9603	4.14538	4.50479	3.87063	4.55081	4.23728	4.67709	4.10725	4.16517	4.05641	4.72711	MCCC1	3
ENSG00000078081	0.908952	0.885851	1.73634	1.6646	2.16672	3.93627	0.824521	3.11804	2.33053	2.21844	3.10625	1.80785	LAMP3	3
ENSG00000078098	3.41339	4.32745	3.84182	4.88112	5.53512	5.91912	5.55852	6.25331	6.17766	5.39122	4.87627	5.42103	FAP	2
ENSG00000078114	5.67321	6.0598	6.65809	6.01007	4.75979	3.87364	5.53872	5.69214	4.60724	5.22178	4.82083	5.00432	NEBL	10
ENSG00000078124	7.21384	4.67738	6.74847	7.09223	5.20544	5.64687	5.41818	5.79552	5.51695	4.95449	4.90986	5.13218	ACER3	11
ENSG00000078140	6.69612	6.49903	6.58007	6.62815	6.37386	6.6324	6.4034	6.48129	6.52475	6.31495	6.50045	6.55174	UBE2K	4
ENSG00000078142	4.86224	5.32198	5.24199	5.36058	5.43891	5.00983	5.52268	5.18339	5.3355	5.45451	5.23016	5.37242	PIK3C3	18
ENSG00000078177	5.17422	4.20015	5.01943	5.11699	4.46638	4.84004	4.79985	5.43467	4.79247	5.00511	5.2824	5.72196	N4BP2	4
ENSG00000078237	0	1.8252	1.77618	2.19363	2.76907	2.96885	2.98887	1.34279	2.94076	2.28551	1.68448	2.29889	TIGAR	12
ENSG00000078246	4.62629	5.61187	5.0883	5.19448	5.20544	4.40341	5.41818	4.95234	5.14678	5.42879	5.06702	4.91985	TULP3	12
ENSG00000078269	4.62629	4.44443	4.9207	5.30576	3.93474	4.66617	4.66751	4.95234	4.50121	4.78523	5.00619	5.51574	SYNJ2	6
ENSG00000078295	2.42986	0	2.37779	2.02287	1.11326	0.406205	1.3459	3.24036	2.45693	2.3179	1.91372	2.15303	ADCY2	5
ENSG00000078304	5.67321	6.0598	5.82965	5.87538	6.06919	6.30464	6.44867	6.39174	6.09745	6.29881	6.20541	6.22924	PPP2R5C	14
ENSG00000078319	2.17336	4.29666	3.82292	3.43697	3.19272	2.96885	3.7647	3.45768	3.44653	3.74428	3.68947	3.49508	PMS2P1	7
ENSG00000078369	7.97738	8.30174	8.02045	7.90603	8.663	8.38931	8.03677	7.94285	8.37516	8.30686	8.12282	8.19658	GNB1	1
ENSG00000078399	1.46224	1.43066	1.77618	1.26561	0.997939	1.20212	1.98379	0	1.02592	1.87081	2.44055	1.49835	HOXA9	7
ENSG00000078401	4.14372	5.03538	4.47077	6.01578	6.06203	3.55231	4.2856	4.58774	4.03816	5.59993	5.09065	4.52592	EDN1	6
ENSG00000078403	6.00435	5.89487	5.71136	6.12537	5.65417	5.56995	5.7601	5.94693	5.8974	5.92579	5.92891	5.88596	MLLT10	10
ENSG00000078487	2.64757	2.87949	2.42867	2.02287	2.93501	2.96885	2.45869	2.83707	2.54495	2.41095	2.54687	2.10849	ZCWPW1	7
ENSG00000078596	3.28936	4.3576	4.241	2.61035	3.95034	4.0254	2.84149	1.72448	3.60509	2.46981	3.57686	3.66616	ITM2A	X
ENSG00000078618	7.37508	7.09888	7.3968	7.5009	7.24857	7.4564	7.02954	7.25838	7.1171	7.23553	7.12584	7.0259	NRDC	1
ENSG00000078668	5.3397	5.92538	5.68805	5.4768	5.65892	5.95738	5.84317	6.17878	5.70064	5.99254	5.86868	5.76205	VDAC3	8
ENSG00000078674	6.72033	7.12541	6.81213	7.04977	7.0602	7.14781	7.02242	6.91696	7.0709	7.14136	7.20781	7.00783	PCM1	8
ENSG00000078687	3.15366	4.13201	3.48118	3.27517	3.78625	4.26386	4.17707	4.33665	4.05824	4.39514	3.95707	3.41505	TNRC6C	17
ENSG00000078699	5.69782	5.38187	5.6158	5.97829	5.31791	5.81463	5.90944	5.46007	5.50236	5.74102	5.88904	6.00159	CBFA2T2	20
ENSG00000078747	6.22352	6.0598	6.46139	6.52593	6.17584	5.92685	5.97574	5.99984	6.26665	5.93103	5.85839	6.27151	ITCH	20
ENSG00000078804	4.21363	4.81411	4.47077	4.75037	4.93461	4.0819	3.83133	4.58774	5.53855	4.37987	5.70609	5.176	TP53INP2	20
ENSG00000078808	8.26355	7.84499	7.92677	7.97939	7.76738	7.76325	7.32951	8.08023	7.72278	7.65638	7.48468	7.55496	SDF4	1
ENSG00000078814	2.17336	1.98823	1.42168	1.1869	1.22004	1.7121	1.48485	1.72448	1.10528	1.35058	2.06453	0.960807	MYH7B	20
ENSG00000078902	5.94392	5.70861	5.54839	5.68445	5.26277	5.54001	5.51864	5.60374	5.71968	5.5867	5.30277	5.44138	TOLLIP	11
ENSG00000078967	2.42986	3.73269	3.34213	3.11433	3.4113	4.18867	3.16454	2.48781	3.43121	3.38011	3.08288	3.02956	UBE2D4	7
ENSG00000079102	4.07024	4.41606	4.42765	3.95917	4.36531	3.73957	5.17305	4.44238	4.40256	4.83645	4.46174	4.29701	RUNX1T1	8
ENSG00000079134	4.77244	4.67738	5.13116	5.28701	5.34765	5.36892	5.44396	5.02221	5.15612	5.08258	5.47425	5.42103	THOC1	18
ENSG00000079150	3.52759	3.8645	2.99922	2.45107	3.36551	3.33707	2.98887	3.64652	2.85152	2.84811	3.28074	3.62723	FKBP7	2
ENSG00000079156	1.86118	2.26764	1.20531	1.6646	2.21915	3.77427	2.42457	0.822287	2.07859	1.47071	1.16704	1.69189	OSBPL6	2
ENSG00000079215	4.98727	5.58664	5.53103	5.99282	6.26583	7.02711	6.39901	6.57727	6.2774	6.4063	6.36894	6.59274	SLC1A3	5
ENSG00000079246	7.39778	7.46703	7.50522	7.70622	7.8351	7.51143	7.46787	7.64914	7.52774	7.6532	7.49468	7.51979	XRCC5	2
ENSG00000079257	2.64757	4.20015	3.04885	5.21446	5.85807	3.24109	5.02719	4.22255	5.30221	5.32501	5.75498	5.16517	LXN	3
ENSG00000079263	1.46224	0.509876	1.31754	1.60531	1.80441	4.66617	1.93614	1.72448	2.62791	1.63402	1.33473	1.86251	SP140	2
ENSG00000079277	6.06234	6.42977	6.18446	6.32235	6.56577	7.23136	7.40035	6.64528	6.9117	6.49752	5.92891	6.38205	MKNK1	1
ENSG00000079308	8.2428	9.30913	8.64969	7.86317	8.27434	7.62035	8.36717	7.88308	8.36663	8.34813	8.00263	7.90465	TNS1	2
ENSG00000079313	6.56852	6.59072	6.51535	6.78335	6.70097	6.21906	6.52915	6.14785	6.27096	6.40253	6.33472	6.37267	REXO1	19
ENSG00000079332	7.21384	7.27506	7.24096	7.36896	7.43746	7.2895	7.12027	7.16106	7.379	7.41097	7.43016	7.64591	SAR1A	10
ENSG00000079335	2.64757	4.32745	4.08323	4.42986	4.72395	3.73957	3.66593	4.03247	4.47157	4.16517	4.4343	4.04858	CDC14A	1
ENSG00000079337	6.48616	7.29467	7.05714	6.38979	7.0566	3.73957	6.06981	5.32835	6.22284	6.17384	6.30977	6.23313	RAPGEF3	12
ENSG00000079385	5.45964	6.46482	6.07294	3.75606	5.04766	3.9963	3.26437	3.45768	4.3465	4.16517	4.89652	4.24138	CEACAM1	19
ENSG00000079387	4.34405	4.7922	4.48886	4.64389	4.15261	3.9666	4.35065	4.33665	4.24503	4.43998	4.38737	4.28706	SENP1	12
ENSG00000079432	6.54159	6.96821	6.84293	7.31099	7.33575	6.58432	7.0811	6.74164	6.95652	7.16604	7.19968	7.15947	CIC	19
ENSG00000079435	4.46365	3.8645	3.407	2.02287	2.45606	1.39286	2.27939	1.34279	2.51621	2.41095	2.47686	2.75403	LIPE	19
ENSG00000079459	6.30585	6.35703	6.19735	6.73229	6.10794	6.54466	6.24622	6.72077	6.29654	6.36814	6.75271	6.80386	FDFT1	8
ENSG00000079462	1.46224	2.38937	2.29795	2.1528	2.87091	2.633	2.24069	3.45768	2.60079	2.89181	3.08288	2.71	PAFAH1B3	19
ENSG00000079482	6.92175	4.97832	6.02208	6.67035	4.30594	4.85633	5.31019	6.08394	4.97256	4.99513	5.55716	5.90562	OPHN1	X
ENSG00000079616	6.08116	5.24343	5.71392	5.86593	5.29366	5.311	5.12605	6.01706	5.49869	5.46901	6.11036	5.39577	KIF22	16
ENSG00000079691	4.62629	5.3066	4.88926	4.8041	4.41111	4.44708	4.95133	4.54089	5.08938	4.73812	4.82788	4.88397	CARMIL1	6
ENSG00000079739	6.1541	5.17736	5.93898	6.48539	5.21838	5.79787	5.35617	5.69214	5.77836	5.32102	5.79867	6.06997	PGM1	1
ENSG00000079785	6.72033	6.74122	6.78065	6.76822	6.61063	6.39661	6.55895	6.81237	6.37068	6.7676	6.6491	6.69699	DDX1	2
ENSG00000079805	7.7195	7.75726	7.74614	7.94093	7.62161	8.03594	7.6834	7.69799	7.93789	7.70388	7.44284	7.6327	DNM2	19
ENSG00000079819	6.64642	7.74305	7.41427	7.03299	7.51028	6.91495	7.66159	7.56969	7.26267	7.29472	7.26215	7.04744	EPB41L2	6
ENSG00000079931	0	1.18382	2.98229	2.48436	2.4991	2.19445	0.174395	0.822287	1.77313	1.41189	1.07527	1.59836	MOXD1	6
ENSG00000079950	6.69612	6.42266	6.76589	6.87093	6.45262	6.72844	7.02242	6.63416	6.77581	6.62276	6.23487	6.99412	STX7	6
ENSG00000079974	4.21363	4.8779	4.62051	4.86224	4.77739	4.75572	5.30551	3.9631	4.33831	4.61315	4.03221	4.39298	RABL2B	22
ENSG00000079999	5.81491	5.79926	5.63488	5.78474	5.49315	5.63748	5.33336	5.50957	5.55631	5.40259	5.47874	5.30248	KEAP1	19
ENSG00000080007	2.64757	2.70289	3.50508	3.4871	3.64006	2.77685	4.00301	3.73241	4.19149	4.13821	4.19367	3.72635	DDX43	6
ENSG00000080189	6.30585	6.36447	6.4414	6.49971	5.87859	6.04525	6.33845	6.45627	5.93589	5.94666	5.75498	6.24218	SLC35C2	20
ENSG00000080200	4.21363	6.19951	5.86702	5.02382	5.73742	4.53065	5.51864	5.48503	5.84056	5.60322	5.54865	5.94256	CRYBG3	3
ENSG00000080298	2.17336	3.58762	3.5745	3.00386	3.91898	3.02756	3.90742	3.45768	3.68476	3.61987	3.82243	3.81909	RFX3	9
ENSG00000080345	5.83723	5.79926	5.85545	5.9428	5.85393	5.69294	5.55852	5.58077	5.92226	5.37206	5.8755	5.70149	RIF1	2
ENSG00000080371	6.47197	6.37187	6.17145	6.32004	6.32983	6.13477	6.08354	6.32419	6.2688	6.13573	6.43504	6.40984	RAB21	12
ENSG00000080493	0.908952	3.17865	3.11247	1.97682	2.73346	0.722808	1.61158	2.27531	1.32009	1.47071	2.44055	1.59836	SLC4A4	4
ENSG00000080503	7.74333	8.36618	7.96551	8.14274	7.89374	8.05194	8.48257	8.38875	8.3289	8.33928	8.57999	8.58046	SMARCA2	9
ENSG00000080546	6.35309	6.50577	6.11626	6.50783	6.30275	6.66974	6.745	6.79251	6.86828	6.81803	6.15307	6.67712	SESN1	6
ENSG00000080561	2.17336	3.73269	3.1734	2.48436	3.34206	2.19445	2.73414	2.98438	3.57753	3.09242	3.08288	3.22996	MID2	X
ENSG00000080573	8.20897	8.63127	8.6851	6.9609	7.38535	5.22581	8.17531	7.54023	6.94848	7.90921	7.22125	7.22417	COL5A3	19
ENSG00000080603	2.42986	2.9603	3.01595	3.21693	2.80382	2.84373	2.58764	2.83707	2.57314	2.84811	3.21776	2.94343	SRCAP	16
ENSG00000080608	4.98727	4.93899	4.80993	4.81068	5.24391	5.17477	4.58496	4.63311	4.98834	4.83084	4.52381	4.83356	PUM3	9
ENSG00000080802	4.90513	4.97832	4.83843	5.12229	4.66846	4.95038	4.79985	4.63311	4.92414	4.99513	4.64845	4.59211	CNOT4	7
ENSG00000080815	6.56852	6.67094	6.51535	6.78502	6.75303	6.42418	6.36343	6.40488	6.47893	6.43797	6.48047	6.54758	PSEN1	14
ENSG00000080819	3.99282	5.12574	4.73105	4.43838	4.88679	4.53065	4.53785	4.95234	4.7437	5.08258	5.2977	5.29007	CPOX	3
ENSG00000080822	5.02665	5.24343	5.5252	5.58052	5.58592	4.8069	5.36519	4.33665	5.39592	5.32102	5.52717	5.58035	CLDND1	3
ENSG00000080823	3.28936	3.73269	3.24612	3.45387	3.71501	2.55531	3.35774	1.72448	2.68068	2.63321	2.40329	2.7395	MOK	14
ENSG00000080824	9.81478	10.1709	9.55523	10.4291	10.1716	10.6223	9.51466	11.3846	11.0741	10.6561	11.8913	10.6482	HSP90AA1	14
ENSG00000080839	3.91101	3.03681	3.94153	4.58372	4.32998	4.40341	3.94402	4.80153	4.1453	4.11074	4.50635	4.00673	RBL1	20
ENSG00000080845	6.89007	6.67094	6.69233	7.33286	7.23271	6.35709	6.56484	6.46884	7.00259	6.66744	7.00514	6.97487	DLGAP4	20
ENSG00000080854	3.00386	4.41606	3.66215	1.82914	2.31863	1.20212	4.08176	2.48781	1.18049	3.03511	2.44055	3.05325	IGSF9B	11
ENSG00000080947	4.34405	3.8645	4.54758	2.83346	3.26932	2.633	4.20749	2.67298	2.96223	3.28499	2.64589	2.86528	CROCCP3	1
ENSG00000080986	2.42986	3.63761	3.86047	3.58244	4.28149	3.13827	3.18506	4.44238	4.31347	3.74428	4.12667	3.56267	NDC80	18
ENSG00000081014	4.57408	4.13201	4.66893	5.07389	4.28149	4.70266	4.40416	4.76123	4.70601	4.46913	4.54107	5.02843	AP4E1	15
ENSG00000081019	4.72535	4.60383	4.52438	4.53688	4.21849	4.68453	4.62307	4.44238	4.66731	4.65179	4.90986	4.63983	RSBN1	1
ENSG00000081026	4.72535	5.16036	5.30802	4.77075	4.996	4.38107	5.55458	5.05592	5.10395	5.2132	5.2977	5.33183	MAGI3	1
ENSG00000081041	0.908952	3.68594	1.81494	2.66944	5.51953	5.10832	1.48485	2.48781	5.68135	5.80241	6.06037	4.95486	CXCL2	4
ENSG00000081059	3.52759	2.87949	3.39426	2.38208	3.76877	2.70671	2.35381	2.02603	3.16103	2.21844	3.79392	2.2587	TCF7	5
ENSG00000081087	5.79224	5.12574	5.67231	5.84366	5.20544	5.50944	5.00427	5.18339	5.39592	5.16503	4.8898	5.26999	OSTM1	6
ENSG00000081154	6.5818	7.04895	6.76589	6.66854	6.81183	6.30464	6.64111	7.10581	6.49191	6.71231	6.93997	6.67997	PCNP	3
ENSG00000081177	4.62629	4.62877	4.5008	4.47197	4.87049	4.38107	4.91492	4.76123	4.73749	4.93373	4.92965	4.93587	EXD2	14
ENSG00000081181	4.28031	2.87949	2.61593	1.54347	2.90332	1.84862	2.02991	2.27531	3.53517	2.63321	3.47281	3.21952	ARG2	14
ENSG00000081189	5.51607	6.97309	6.43208	6.22722	6.91874	6.47253	7.14798	6.1634	6.9974	6.84607	6.4827	6.87704	MEF2C	5
ENSG00000081237	3.41339	5.21077	4.37674	5.43484	7.2359	8.60829	6.18639	6.14785	7.02827	6.1082	4.89652	5.44362	PTPRC	1
ENSG00000081277	4.98727	4.44443	3.30176	4.51288	4.7861	4.70266	5.02149	4.33665	4.41039	4.19164	4.90986	4.24138	PKP1	1
ENSG00000081307	5.3397	5.72025	5.48069	5.43909	5.59091	5.39145	5.73943	5.60374	5.45392	5.52212	6.44653	6.63848	UBA5	3
ENSG00000081320	4.81804	5.39647	5.38732	4.70872	6.11833	5.83943	4.75249	4.76123	5.80831	5.29278	5.18697	4.76347	STK17B	2
ENSG00000081377	4.14372	4.29666	3.90606	4.12668	4.36531	4.93512	5.43112	4.49248	4.84543	4.83645	5.06105	5.18407	CDC14B	9
ENSG00000081386	3.15366	3.90589	3.65148	3.55135	3.67802	3.63015	3.89502	4.16193	3.33572	3.60682	3.50833	3.72635	ZNF510	9
ENSG00000081479	6.85769	6.82452	7.09307	7.22496	6.74857	6.40216	7.14274	7.45436	7.56944	6.82509	7.74041	7.8299	LRP2	2
ENSG00000081665	4.98727	4.76996	4.99432	4.56049	4.51962	4.38107	4.85853	4.03247	4.52305	4.38753	4.13806	4.22583	ZNF506	19
ENSG00000081692	4.51992	4.13201	3.7347	3.58244	3.87063	3.93627	3.42832	4.09865	3.80847	3.65833	3.36066	3.56267	JMJD4	1
ENSG00000081721	3.82428	4.29666	3.65148	3.70047	3.87063	3.51175	3.79172	3.35311	3.35208	3.9022	4.19367	3.51228	DUSP12	1
ENSG00000081760	5.06498	4.85695	4.40877	4.48847	4.46638	4.73825	4.2568	4.39049	4.86836	4.64542	4.09197	4.09498	AACS	12
ENSG00000081791	6.51414	6.20781	6.70914	6.52193	6.38538	6.05234	6.44229	6.20906	6.37269	6.0919	5.93545	6.23831	DELE1	5
ENSG00000081803	3.52759	3.94613	3.30176	2.69811	4.28149	2.38613	3.55989	3.9631	3.46169	3.44022	3.36066	3.66616	CADPS2	7
ENSG00000081853	1.86118	2.13469	1.88947	0.921162	1.73408	1.7121	1.93614	2.48781	1.6725	1.68459	0.977264	1.42761	PCDHGA2	5
ENSG00000081870	4.21363	3.98527	4.21949	3.71457	4.01108	3.24109	4.07077	4.03247	3.90033	4.06375	3.80824	3.82599	HSPB11	1
ENSG00000081913	5.43058	5.16036	5.59089	5.73719	4.84568	4.99519	5.30551	5.55742	5.10395	5.17391	5.17043	5.7476	PHLPP1	18
ENSG00000081923	4.14372	5.16036	4.90731	5.08479	4.67786	4.44708	5.13135	5.43467	4.77437	5.16057	5.74756	5.82189	ATP8B1	18
ENSG00000081985	3.15366	4.85695	3.99314	4.13719	4.61075	5.56004	5.6936	3.9631	5.09425	4.87506	3.73516	4.16189	IL12RB2	1
ENSG00000082014	4.72535	5.14315	4.5929	3.78307	4.39979	4.26386	4.45576	4.54089	4.39468	4.43998	4.52381	4.28205	SMARCD3	7
ENSG00000082068	4.62629	4.60383	4.64761	4.50479	4.61075	5.21322	4.87126	4.9877	4.47157	4.74409	4.67995	4.72711	WDR70	5
ENSG00000082074	5.02665	5.64891	5.2241	5.60721	6.71701	9.0501	7.19302	6.29625	7.17343	6.5116	6.08117	6.49988	FYB1	5
ENSG00000082146	4.14372	4.20015	4.42138	4.81722	4.17932	4.51021	4.8457	4.58774	4.55873	4.76774	4.47077	4.6241	STRADB	2
ENSG00000082153	6.65901	6.82452	7.00152	7.09896	7.22472	6.91495	6.49668	6.78248	7.06347	7.00499	7.07196	7.12495	BZW1	2
ENSG00000082175	1.86118	2.38937	2.83919	1.82914	2.65949	0.982281	1.88687	2.27531	3.90033	2.3806	1.91372	1.23389	PGR	11
ENSG00000082196	0.908952	0	1.73634	1.6646	0.872596	0.982281	1.72807	0	0.546523	0.915172	1.16704	1.1038	C1QTNF3	5
ENSG00000082212	4.72535	5.10812	5.13116	5.36058	6.12865	6.30464	6.21162	6.1634	5.78741	5.59333	4.96204	5.47685	ME2	18
ENSG00000082213	4.14372	3.53583	4.30367	4.46365	4.06937	3.59176	4.16678	3.64652	3.86657	4.00527	3.543	4.18352	C5orf22	5
ENSG00000082258	5.45964	5.63667	6.00542	5.85643	5.67309	5.16172	5.74635	5.02221	5.77836	5.75291	5.88904	5.63239	CCNT2	2
ENSG00000082269	5.45964	3.68594	4.97733	5.27279	4.3769	4.28807	3.99141	4.63311	4.13588	4.01518	3.50833	4.19421	FAM135A	6
ENSG00000082397	7.07047	7.06274	7.1661	7.42469	7.42775	7.8079	7.78439	7.46695	7.66911	7.28758	7.08378	7.41054	EPB41L3	18
ENSG00000082438	8.90753	7.57682	9.12857	9.59404	6.85596	7.18698	7.00809	7.47942	7.30109	7.16715	7.00669	7.71947	COBLL1	2
ENSG00000082458	4.34405	4.83569	5.02358	5.23417	4.54037	4.87244	4.76618	4.39049	4.57276	4.85312	4.74095	4.53436	DLG3	X
ENSG00000082497	3.63341	1.98823	3.52859	4.25762	2.83775	1.84862	1.88687	3.64652	3.38426	3.36469	3.57686	3.20902	SERTAD4	1
ENSG00000082512	3.63341	5.29107	4.5817	4.0947	4.69647	5.311	4.83923	4.71978	4.55873	4.74409	4.63244	4.69359	TRAF5	1
ENSG00000082515	3.63341	4.41606	3.88799	3.95917	3.80353	3.73957	3.70909	4.28073	3.91142	4.06375	4.35846	4.16732	MRPL22	5
ENSG00000082516	4.28031	3.8645	4.3832	4.37766	4.06937	4.13627	4.08176	4.71978	4.11686	4.17405	4.14935	4.04268	GEMIN5	5
ENSG00000082641	8.4122	8.3494	8.15542	8.50505	8.25877	8.51903	8.3227	8.41496	8.71463	8.48817	8.12854	8.20585	NFE2L1	17
ENSG00000082684	3.15366	3.58762	3.94153	1.1869	1.99691	0.722808	3.12258	0.822287	0.852784	2.3806	1.91372	1.88908	SEMA5B	3
ENSG00000082701	5.94392	5.69686	6.27413	6.40291	5.98083	5.457	5.90015	5.96478	5.89461	5.83915	5.94196	6.44273	GSK3B	3
ENSG00000082781	8.07921	7.7797	7.82363	7.69293	7.23431	7.22824	7.56994	7.30117	8.05182	7.51245	7.84744	8.0534	ITGB5	3
ENSG00000082805	6.27348	6.76953	6.221	5.95175	5.93062	5.88777	5.73595	5.69214	6.31752	6.14253	6.21619	6.52021	ERC1	12
ENSG00000082898	7.09846	7.55096	7.54106	7.62551	7.50633	7.54949	7.66159	7.86418	7.43671	7.56232	7.99012	7.75963	XPO1	2
ENSG00000082996	6.08116	5.8102	6.32705	6.5866	6.12178	6.85946	6.45291	6.62296	6.45452	6.32096	6.04231	6.53291	RNF13	3
ENSG00000083093	3.28936	3.58762	3.3288	3.25602	3.49874	3.51175	3.51195	2.98438	3.64548	2.89181	3.45471	3.26081	PALB2	16
ENSG00000083097	4.28031	4.38713	5.09225	5.14849	4.24402	4.73825	5.15755	3.9631	4.64092	4.62615	4.71838	4.59211	DOP1A	6
ENSG00000083099	5.64818	5.35223	5.36464	5.69159	5.27521	5.58957	5.62764	5.75505	5.37206	5.39122	5.20873	5.46586	LYRM2	6
ENSG00000083123	3.91101	3.30779	4.25516	4.17846	2.99639	2.55531	3.47908	3.45768	3.31918	3.07357	3.72009	3.49508	BCKDHB	6
ENSG00000083168	6.52793	6.84062	6.72704	6.73575	6.41378	6.25021	6.25353	6.22396	6.68186	6.34867	6.71899	6.6257	KAT6A	8
ENSG00000083223	6.13621	5.59931	6.16584	6.05509	5.48782	6.44048	5.24813	5.46007	5.8974	5.47979	5.2721	5.64998	TUT7	9
ENSG00000083290	4.07024	5.36713	5.33494	4.96607	5.06925	4.77299	5.60115	5.21357	5.51695	5.44354	5.09065	5.38881	ULK2	17
ENSG00000083307	6.608	4.67738	6.44295	6.84071	4.75092	4.9197	5.47346	5.69214	5.31478	5.49404	5.38151	5.77279	GRHL2	8
ENSG00000083312	6.73229	6.82991	7.02341	6.94155	6.77946	6.54466	6.66688	6.66725	6.83375	6.57664	6.87511	7.00023	TNPO1	5
ENSG00000083444	6.45763	7.55747	6.98355	6.85192	7.61917	7.04853	6.60538	6.7622	7.29052	7.21202	7.42784	7.36097	PLOD1	1
ENSG00000083457	3.28936	3.10948	2.98229	2.85907	2.90332	4.62873	3.28354	2.83707	3.31918	2.84811	2.70832	2.69501	ITGAE	17
ENSG00000083520	5.64818	5.42522	5.45023	5.61475	5.50904	5.1877	5.21857	5.18339	5.25514	5.27226	5.51848	5.36771	DIS3	13
ENSG00000083535	4.40509	4.38713	4.64223	4.79085	4.87866	4.53065	4.59266	3.9631	4.21851	4.5868	4.05641	4.21011	PIBF1	13
ENSG00000083544	4.14372	3.48211	3.8697	3.65733	3.95034	4.38107	3.96791	3.35311	4.1264	4.01518	3.52577	4.00065	TDRD3	13
ENSG00000083635	1.46224	3.03681	2.37779	2.34631	2.80382	3.13827	2.76173	3.35311	2.78076	2.73269	3.57686	2.7395	NUFIP1	13
ENSG00000083642	5.02665	5.57386	5.59924	5.54545	5.50904	5.457	5.52268	5.55742	5.40771	5.7938	5.6634	5.74214	PDS5B	13
ENSG00000083720	2.42986	3.53583	3.20293	3.47058	3.75107	3.9963	3.69484	3.55519	3.47669	3.46935	4.01996	3.55439	OXCT1	5
ENSG00000083750	3.15366	4.44443	4.07527	3.87381	4.09765	3.66756	4.17707	4.09865	4.11686	3.9339	3.98256	3.84647	RRAGB	X
ENSG00000083782	0	0.509876	0.128657	0	0	2.70671	0.329964	2.02603	1.32009	0	0	2.75403	EPYC	12
ENSG00000083799	4.28031	5.41091	5.39374	5.07935	6.06919	6.41322	5.39634	5.18339	5.57036	5.54283	5.87209	5.52847	CYLD	16
ENSG00000083812	3.15366	3.68594	3.24612	3.38502	2.73346	2.4732	3.46235	3.45768	2.98339	3.18315	3.19613	3.14431	ZNF324	19
ENSG00000083814	3.52759	4.60383	4.04298	3.53556	3.67802	3.73957	4.49739	3.45768	3.35208	3.6328	3.64228	3.30094	ZNF671	19
ENSG00000083817	1.86118	2.60576	2.82027	2.48436	2.65949	1.56129	2.49203	0.822287	1.99771	2.14811	1.74529	1.77972	ZNF416	19
ENSG00000083828	4.14372	3.42631	4.13776	3.53556	3.6207	3.13827	3.751	3.24036	3.25102	3.4837	3.41782	2.94343	ZNF586	19
ENSG00000083838	3.63341	2.79389	3.76471	3.53556	2.83775	3.66756	3.47908	3.55519	3.04507	3.55339	3.03497	3.14431	ZNF446	19
ENSG00000083844	4.67667	4.93899	4.63683	4.69456	4.81194	4.99519	4.78647	4.49248	4.62754	4.6956	4.46174	4.63199	ZNF264	19
ENSG00000083845	8.26767	7.91001	7.44857	7.45335	7.83405	7.59873	7.58063	8.24272	7.97335	7.92244	8.09315	7.78682	RPS5	19
ENSG00000083857	6.24037	6.74122	6.78432	4.91203	6.02936	4.31189	4.82622	5.75505	5.95476	5.19587	5.34759	5.76743	FAT1	4
ENSG00000083896	7.44214	7.12978	7.54251	7.87027	6.9227	6.90324	7.1176	7.66561	7.17227	7.52638	7.6248	7.23327	YTHDC1	4
ENSG00000083937	5.85921	5.22719	5.95208	6.27794	5.29366	5.36892	5.11539	5.58077	5.60831	5.55647	5.56139	5.63828	CHMP2B	3
ENSG00000084070	5.06498	6.04135	5.55126	5.26323	6.71473	7.62035	6.04194	5.71342	6.60203	6.14253	5.71372	5.71083	SMAP2	1
ENSG00000084072	5.2427	4.97832	5.12732	5.38723	4.98847	5.59928	5.57027	5.46007	4.91315	5.25563	5.20332	5.09271	PPIE	1
ENSG00000084073	5.02665	5.35223	5.23128	5.38723	5.42224	5.56004	5.47346	5.62635	5.30641	5.41762	5.07296	5.47904	ZMPSTE24	1
ENSG00000084090	5.7458	6.15729	5.98219	6.18986	6.21832	6.6605	6.34074	6.33795	6.41418	6.21957	6.19727	6.56622	STARD7	2
ENSG00000084092	4.07024	4.20015	3.9239	4.21859	3.90304	4.21417	4.11423	4.84074	4.11686	4.36445	4.65639	4.29701	NOA1	4
ENSG00000084093	5.64818	5.41091	5.29779	5.5728	5.38256	5.63748	5.70786	5.32835	5.55631	5.48337	5.69071	5.55568	REST	4
ENSG00000084112	4.90513	6.44389	5.79856	5.86277	6.24702	6.10099	5.97868	5.69214	6.37068	6.1289	6.80006	6.63554	SSH1	12
ENSG00000084207	7.97234	7.36685	7.40873	7.46591	7.12519	7.06964	6.71884	7.72444	7.39686	7.21739	7.49136	7.2104	GSTP1	11
ENSG00000084234	9.59172	9.62015	9.23132	10.0643	10.0566	9.6792	10.2357	10.202	10.118	10.0739	10.1794	10.4101	APLP2	11
ENSG00000084444	4.77244	3.98527	5.3679	5.39162	4.7861	4.82357	4.89637	4.80153	4.61404	4.7261	4.82788	5.55153	FAM234B	12
ENSG00000084463	6.06234	6.19951	6.32705	6.81641	6.62527	6.62291	6.26804	6.22396	6.61395	6.63245	6.87511	6.42808	WBP11	12
ENSG00000084623	6.62092	6.4509	6.34371	6.45633	6.66834	6.60856	6.18385	6.62296	6.63081	6.60153	6.90374	6.59071	EIF3I	1
ENSG00000084636	6.20648	7.08543	6.39738	6.41591	7.31633	7.54196	7.81435	7.85941	7.26807	7.80806	7.28793	7.40076	COL16A1	1
ENSG00000084652	5.76921	6.55864	6.38294	6.27557	6.3476	6.3628	6.61298	6.26777	6.24491	6.38544	6.58399	6.41328	TXLNA	1
ENSG00000084676	5.83723	6.12259	6.01378	5.89098	6.42777	6.32819	6.36343	6.05088	6.79687	6.58997	6.32479	6.40064	NCOA1	2
ENSG00000084693	3.82428	3.73269	4.82425	4.8041	4.51962	4.23923	4.43019	4.80153	4.3465	4.44733	4.94269	4.45209	AGBL5	2
ENSG00000084710	2.83669	4.06051	4.13776	2.54873	3.29398	0.982281	4.03729	1.72448	2.19199	3.1294	3.17418	4.12323	EFR3B	2
ENSG00000084731	3.15366	3.36827	2.87632	3.23661	3.71501	3.13827	4.00301	2.98438	3.86657	4.0348	3.56003	3.33999	KIF3C	2
ENSG00000084733	6.27348	6.65888	6.51387	6.58468	6.72156	6.94952	6.69399	6.54202	6.70114	6.84884	6.44424	6.82207	RAB10	2
ENSG00000084754	7.69526	7.24312	7.56897	7.71414	7.63373	7.73269	7.74778	8.00025	7.8053	7.6015	7.87152	7.97145	HADHA	2
ENSG00000084764	6.98309	4.20015	6.1602	5.75776	4.36531	3.51175	4.13548	4.9877	4.11686	4.01518	4.03221	3.83968	MAPRE3	2
ENSG00000084774	5.17422	5.77712	5.92354	6.02146	5.55055	5.40258	5.83994	5.62635	5.49133	5.46178	5.62346	5.41876	CAD	2
ENSG00000085063	8.76928	7.73159	8.27275	8.91031	7.20536	7.61796	7.3191	7.16106	7.70299	7.03332	7.24645	7.66813	CD59	11
ENSG00000085117	5.7458	5.92538	5.81299	5.30109	6.9068	7.1211	5.93086	5.87321	6.4752	5.5394	5.32286	5.37712	CD82	11
ENSG00000085185	6.86856	6.90838	6.88794	7.44174	6.03303	5.82295	6.63179	6.22396	6.36263	6.77783	6.52451	6.77476	BCORL1	X
ENSG00000085224	6.82455	6.78625	6.68581	7.13872	7.02933	7.36828	7.29451	7.08147	6.90755	7.05149	7.1429	7.20182	ATRX	X
ENSG00000085231	3.63341	2.38937	2.29795	2.66944	3.1393	3.42705	2.78881	3.64652	2.75639	3.07357	3.17418	3.06495	AK6	5
ENSG00000085265	2.42986	2.26764	1.56501	2.98072	5.56075	5.74636	1.93614	3.24036	3.33572	3.61987	0.758686	1.23389	FCN1	9
ENSG00000085274	4.07024	3.98527	4.49484	4.20866	4.12539	3.13827	4.04854	3.55519	4.16395	4.09212	4.27842	4.17814	MYNN	3
ENSG00000085276	5.10232	6.28042	5.79372	5.32885	6.10097	0	5.55458	4.8789	5.49133	5.39881	5.17043	5.62253	MECOM	3
ENSG00000085365	4.21363	5.27536	4.8938	4.83669	5.63981	4.42541	5.11539	5.08886	5.41552	5.52212	5.63556	5.82362	SCAMP1	5
ENSG00000085377	5.13872	5.63667	5.39693	4.70872	5.43891	5.36892	5.12073	4.95234	5.06973	5.02977	5.25128	5.22115	PREP	6
ENSG00000085382	6.27348	7.09441	7.10583	5.53357	5.7284	4.60964	6.3902	5.53369	5.99178	5.77933	6.71519	6.45167	HACE1	6
ENSG00000085415	4.28031	4.38713	4.34398	4.56049	5.31791	4.82357	4.41289	4.71978	4.76829	4.65813	4.69545	4.73812	SEH1L	18
ENSG00000085433	2.42986	4.16648	3.88799	3.53556	4.20555	3.63015	3.93192	4.54089	4.41818	4.12911	4.30896	4.19421	WDR47	1
ENSG00000085449	4.67667	5.64891	5.31817	5.1995	5.61067	5.73759	5.55063	5.55742	5.52419	5.55986	5.78063	5.93142	WDFY1	2
ENSG00000085465	3.41339	2.38937	3.21747	3.21693	2.31863	1.39286	2.81539	2.98438	3.2157	3.03511	3.12925	3.39665	OVGP1	1
ENSG00000085491	4.14372	5.27536	5.34491	4.9059	5.53512	5.311	5.03852	5.32835	5.38801	5.40636	4.81375	5.43463	SLC25A24	1
ENSG00000085511	4.94679	5.61187	5.92576	5.55723	4.92675	4.82357	5.32414	5.24313	5.40379	5.27638	5.28752	5.4921	MAP3K4	6
ENSG00000085514	1.46224	3.03681	2.06052	2.5169	3.99613	5.69294	2.91706	2.98438	4.1453	3.41048	2.06453	2.95606	PILRA	7
ENSG00000085552	0.908952	1.64138	2.78165	2.45107	1.66014	0.722808	2.38962	0	1.50703	2.07416	2.54687	2.039	IGSF9	1
ENSG00000085563	5.40091	3.73269	6.37809	6.5556	3.8206	2.84373	0.824521	4.03247	3.25102	1.28654	2.58064	2.27894	ABCB1	7
ENSG00000085644	3.82428	3.36827	3.51688	3.11433	2.80382	3.59176	3.30245	3.11804	3.33572	3.01549	3.28074	3.04145	ZNF213	16
ENSG00000085662	7.97738	7.93521	7.56684	7.66416	7.50501	7.79317	7.58546	8.17147	7.82375	7.6682	7.93734	8.1643	AKR1B1	7
ENSG00000085719	5.57038	5.35223	5.56554	5.77131	5.65892	5.28717	6.11865	5.83489	5.90018	5.88852	6.01787	6.12829	CPNE3	8
ENSG00000085721	4.72535	5.09027	5.27364	5.07935	5.31791	5.00983	5.1679	5.55742	5.18381	5.32501	5.85495	5.71083	RRN3	16
ENSG00000085733	8.20897	8.17204	8.2771	8.30353	7.84243	7.0199	8.00031	7.69799	7.66993	7.77781	7.80611	7.79299	CTTN	11
ENSG00000085741	3.00386	3.03681	2.24215	2.80739	2.69695	0.722808	3.35774	1.72448	2.29712	3.64562	2.67744	2.76842	WNT11	11
ENSG00000085760	4.28031	5.09027	5.00274	4.89356	4.9109	5.21322	5.09384	4.9877	5.04479	5.07312	4.92965	4.98905	MTIF2	2
ENSG00000085788	4.90513	5.07221	5.40965	5.11699	5.11839	5.22581	5.32876	5.38249	5.52779	5.38358	5.72131	5.66927	DDHD2	8
ENSG00000085832	5.94392	6.51249	6.42583	6.68475	6.86833	6.99068	7.22806	6.56562	7.0535	6.91255	6.59642	6.92035	EPS15	1
ENSG00000085840	0.908952	1.8252	1.96034	2.61035	2.80382	1.56129	1.72807	2.27531	3.25102	2.11161	3.26005	2.23817	ORC1	1
ENSG00000085871	4.14372	4.91891	4.17548	3.88631	4.93461	4.16271	4.21749	4.49248	4.26245	4.27651	4.26809	4.44315	MGST2	4
ENSG00000085872	6.20648	6.24859	6.02208	6.5673	5.98463	5.66548	5.8171	5.83489	5.78138	6.14929	6.1418	6.14493	CHERP	19
ENSG00000085978	4.34405	4.7922	4.73611	4.67306	4.81194	4.88836	4.60032	4.8789	4.94586	4.7261	4.319	4.62014	ATG16L1	2
ENSG00000085982	6.28976	5.76593	6.23536	6.5159	5.49847	5.4991	6.13192	6.32419	6.09502	5.96212	5.9452	6.39601	USP40	2
ENSG00000085998	6.55511	5.95526	6.2828	6.48745	5.76854	5.56995	5.83994	5.62635	5.431	5.67376	5.31285	5.61658	POMGNT1	1
ENSG00000085999	3.28936	2.26764	3.3814	3.34933	3.78625	2.77685	3.22526	4.16193	3.26836	2.63321	4.30896	2.61767	RAD54L	1
ENSG00000086015	5.62271	6.02266	5.92354	5.99571	5.56582	5.72877	6.10255	6.14785	6.04054	5.76765	6.15026	6.0436	MAST2	1
ENSG00000086061	7.88933	7.87657	7.72849	8.40155	7.66005	8.44557	7.4286	8.43431	8.37716	8.3269	9.64022	8.69385	DNAJA1	9
ENSG00000086062	8.44163	6.96821	7.98423	8.60351	7.55941	7.87738	7.56896	7.76576	7.86495	7.61948	7.82385	8.09037	B4GALT1	9
ENSG00000086065	6.38374	6.29607	6.39738	6.4288	6.17584	6.71511	6.24378	6.31029	6.00994	6.14479	6.21081	6.203	CHMP5	9
ENSG00000086102	5.30808	5.50819	5.45637	6.04117	5.78168	5.91912	6.1133	5.94693	5.69744	5.74102	5.35736	5.65773	NFX1	9
ENSG00000086189	4.67667	3.98527	4.39604	4.3235	4.70569	4.46843	4.50557	4.54089	4.51581	4.39514	4.74095	4.44763	DIMT1	5
ENSG00000086200	4.14372	4.47225	4.38964	4.0947	4.83732	3.63015	4.31384	4.09865	4.03816	4.50474	4.62437	4.46981	IPO11	5
ENSG00000086232	7.28863	7.31402	7.24096	7.54101	6.86216	7.13785	7.43183	7.55209	7.26914	7.37486	7.38668	7.62778	EIF2AK1	7
ENSG00000086289	1.86118	1.8252	2.50177	1.1869	1.41246	3.1906	2.58764	1.72448	3.65869	1.52723	1.16704	1.72177	EPDR1	7
ENSG00000086300	4.07024	1.64138	4.67421	5.06291	3.91898	6.95709	2.76173	4.09865	4.2274	3.33334	2.79717	3.43323	SNX10	7
ENSG00000086475	4.72535	5.24343	5.36464	5.31041	5.15922	4.9197	5.13663	4.8789	4.78646	5.26812	5.25128	5.19476	SEPHS1	10
ENSG00000086504	4.90513	4.83569	4.41509	4.47197	4.67786	4.85633	4.51371	4.39049	4.75605	4.65179	4.71078	4.71602	MRPL28	16
ENSG00000086544	6.51414	4.85695	5.63217	6.08795	5.77731	5.25067	5.13135	4.8789	5.84923	5.33296	5.32286	5.31478	ITPKC	19
ENSG00000086570	0	2.13469	0.804224	0.712212	0.221804	3.28988	0.925573	1.34279	3.74794	3.2179	1.41179	3.65072	FAT2	5
ENSG00000086589	6.11809	5.57386	6.51535	7.21011	5.76854	5.8638	5.7872	6.03407	5.82012	5.98751	6.59022	6.01674	RBM22	5
ENSG00000086598	7.45663	7.25918	7.07721	7.43644	7.36368	7.29249	6.89583	7.31515	7.25072	7.29268	7.24908	7.41797	TMED2	12
ENSG00000086619	2.83669	4.55263	3.95894	3.45387	4.15261	3.93627	4.22742	3.45768	4.19149	4.21763	3.90471	4.65152	ERO1B	1
ENSG00000086666	5.76921	5.52156	5.62401	5.71633	5.74191	5.78941	5.72548	5.15256	5.54923	5.48693	5.73637	5.60059	ZFAND6	15
ENSG00000086696	8.32407	9.15566	8.09518	6.90821	8.36875	5.64687	7.40035	7.27993	6.86686	7.75654	7.57854	7.07012	HSD17B2	16
ENSG00000086712	3.732	4.74736	4.22669	4.06199	4.69647	4.5903	4.46418	4.09865	4.48646	4.53262	4.93619	4.25166	TXLNG	X
ENSG00000086730	4.21363	4.41606	3.41963	4.21859	5.34175	6.21906	4.82622	4.44238	4.84543	4.57345	3.79392	3.33999	LAT2	7
ENSG00000086758	7.65813	7.83966	7.73986	7.80094	7.39962	7.45907	7.75294	7.53426	7.74618	7.70924	7.80968	7.86043	HUWE1	X
ENSG00000086827	3.15366	4.02338	3.61899	3.94728	3.87063	3.80816	3.86988	4.09865	4.04823	3.9339	4.19367	3.87998	ZW10	11
ENSG00000086848	3.28936	1.98823	2.78165	2.88423	2.31863	2.633	2.61816	1.72448	2.75639	2.89181	3.05912	2.41316	ALG9	11
ENSG00000086991	2.17336	4.16648	2.47781	2.9572	3.49874	1.56129	2.61816	1.72448	2.26292	2.80304	3.10625	2.90489	NOX4	11
ENSG00000087008	5.83723	4.38713	5.15024	5.88787	4.05502	4.62873	4.27607	4.95234	4.49386	4.08273	4.57497	5.40501	ACOX3	4
ENSG00000087053	5.06498	5.61187	5.51051	4.89356	5.7284	4.66617	5.36968	4.80153	5.29799	5.68001	5.88904	5.38181	MTMR2	11
ENSG00000087074	7.7551	7.52131	7.47528	9.54014	8.90328	8.79414	6.87387	9.23851	9.22123	9.40837	9.9892	8.8998	PPP1R15A	19
ENSG00000087076	3.63341	3.17865	3.58575	3.0929	2.21915	3.77427	3.94402	2.83707	3.76025	2.89181	2.64589	3.78413	HSD17B14	19
ENSG00000087077	5.90219	6.11379	5.69846	5.36506	5.50376	5.17477	5.62764	5.92885	5.71968	5.61956	5.98357	5.82534	TRIP6	7
ENSG00000087085	2.64757	2.38937	2.12364	2.30963	3.26932	3.33707	1.72807	2.98438	2.03871	2.75652	2.70832	2.17479	ACHE	7
ENSG00000087086	9.90998	10.4741	9.45698	10.001	10.8085	12.1244	10.7614	10.9828	11.3663	11.3603	10.5379	10.9706	FTL	19
ENSG00000087087	8.04606	7.55096	7.72213	8.01542	7.48374	7.37677	7.40364	7.53426	7.24963	7.50015	7.82825	7.317	SRRT	7
ENSG00000087088	5.96435	5.68502	5.73933	5.46851	5.78603	6.23783	5.55852	5.43467	6.05311	5.58337	5.76602	5.6026	BAX	19
ENSG00000087095	4.21363	4.0967	4.29684	4.62908	4.59099	4.62873	4.98098	3.64652	4.72498	4.45463	4.35846	4.85056	NLK	17
ENSG00000087111	5.3397	4.97832	5.18764	5.54545	5.34175	5.7199	5.39193	5.32835	5.51695	5.30899	5.65945	5.64998	PIGS	17
ENSG00000087116	6.32177	7.23096	6.46444	5.89098	7.02381	7.29548	6.68321	6.81237	7.37601	6.7573	5.9452	6.34534	ADAMTS2	5
ENSG00000087152	7.19668	6.72974	6.62711	6.91433	6.3968	6.39661	6.40995	6.35159	6.37469	6.54961	6.46247	6.58463	ATXN7L3	17
ENSG00000087157	5.57038	6.49903	6.47052	6.16953	6.5247	5.56004	6.50078	5.69214	5.45013	5.79955	5.60306	6.22142	PGS1	17
ENSG00000087191	7.53382	6.72397	6.96321	7.30401	6.61797	6.73286	6.69756	6.73124	6.42582	6.77783	6.59436	6.31258	PSMC5	17
ENSG00000087206	4.34405	4.67738	4.96876	4.98945	5.29366	5.311	5.12605	5.2721	5.01941	5.2887	4.92965	5.20802	UIMC1	5
ENSG00000087237	2.83669	5.53482	4.5817	3.70047	3.87063	1.84862	2.16004	0.822287	2.73159	1.58161	2.54687	2.41316	CETP	16
ENSG00000087245	7.17055	8.03185	7.08715	7.38006	7.85905	8.78885	8.60522	8.65931	8.26122	8.82047	7.23325	7.99878	MMP2	16
ENSG00000087253	3.99282	4.76996	3.49318	5.00099	5.17258	6.21275	5.80389	5.21357	5.50602	6.11513	5.42863	5.00128	LPCAT2	16
ENSG00000087258	2.64757	1.64138	0.8793	0.820467	0.583589	2.19445	1.671	1.72448	2.51621	0.915172	1.07527	1.27477	GNAO1	16
ENSG00000087263	3.99282	4.93899	4.59846	4.62908	4.996	4.79004	4.60032	4.03247	4.63425	4.70788	5.03083	4.73446	OGFOD1	16
ENSG00000087266	7.48518	6.76953	7.32728	7.99102	7.05119	7.50628	7.35124	6.85128	6.79986	6.95823	6.04534	6.51382	SH3BP2	4
ENSG00000087269	5.59678	5.66105	5.54263	5.77131	5.86631	5.59928	5.42682	5.60374	5.47648	5.5394	5.43326	5.48558	NOP14	4
ENSG00000087274	7.56759	8.16353	7.95199	7.82956	8.03481	7.68789	7.93439	7.68189	7.95205	7.98745	7.87577	7.94676	ADD1	4
ENSG00000087299	2.42986	2.9603	2.93028	2.90897	2.99639	2.90764	3.2053	3.11804	3.17948	2.80304	3.50833	3.39665	L2HGDH	14
ENSG00000087301	2.64757	3.73269	2.85788	2.98072	2.99639	2.96885	3.77827	3.73241	3.64548	3.30129	3.30114	3.45117	TXNDC16	14
ENSG00000087302	5.27576	5.58664	5.1578	5.29642	5.74191	5.4782	5.08295	5.46007	5.49869	5.39502	5.81649	5.70524	RTRAF	14
ENSG00000087303	6.32177	7.45314	7.9837	7.65688	8.0284	5.4991	7.89755	7.27993	7.84919	7.35548	8.26265	7.70319	NID2	14
ENSG00000087338	5.02665	4.23304	5.26317	5.17422	4.43347	5.10832	5.13135	5.50957	4.87969	5.09198	4.93619	5.51147	GMCL1	2
ENSG00000087365	7.98739	7.92518	7.82956	8.27051	7.82562	8.05547	7.72868	7.92016	7.88124	7.93881	7.95595	7.77663	SF3B2	11
ENSG00000087448	5.54348	6.26459	6.05686	6.04954	5.89076	5.25067	6.25353	6.13214	5.68135	5.97994	6.06037	6.44049	KLHL42	12
ENSG00000087460	9.65748	9.69363	9.29119	9.44267	9.6316	9.72316	9.77038	9.718	9.77034	9.76279	9.9368	10.0801	GNAS	20
ENSG00000087470	6.1541	6.37187	6.07294	6.18227	6.40532	6.00198	6.1133	6.25331	6.20943	6.18486	6.15867	6.25628	DNM1L	12
ENSG00000087495	0.908952	2.26764	1.51879	0.173336	0.414007	1.84862	1.61158	0	0.157225	0.635635	1.16704	1.56579	PHACTR3	20
ENSG00000087502	5.81491	5.56096	5.74938	5.80465	5.65417	5.06693	5.41384	5.43467	5.51332	5.20456	5.5401	5.71455	ERGIC2	12
ENSG00000087510	6.73229	5.14315	6.2282	6.63001	5.31188	5.40258	5.98455	6.08394	5.50236	5.83915	6.43273	6.45278	TFAP2C	20
ENSG00000087586	3.63341	3.24467	3.20293	3.4871	3.67802	3.70401	2.35381	4.49248	4.1453	3.23497	4.84187	3.3108	AURKA	20
ENSG00000087589	3.63341	3.53583	3.43215	2.19363	3.11183	3.1906	2.64804	1.72448	2.78076	2.82575	2.51229	1.66138	CASS4	20
ENSG00000087842	3.41339	3.68594	2.50177	4.00578	3.11183	3.42705	3.94402	3.11804	3.30244	3.33334	3.37997	4.07197	PIR	X
ENSG00000087884	2.42986	2.50162	1.99452	2.02287	2.31863	2.55531	2.35381	2.67298	2.07859	2.52636	3.10625	2.338	AAMDC	11
ENSG00000087903	3.15366	1.98823	3.23187	3.36729	2.5409	2.70671	2.27939	2.83707	2.62791	2.3179	2.01599	2.27894	RFX2	19
ENSG00000087995	2.17336	3.58762	3.74477	3.91101	3.90304	4.18867	4.11423	4.54089	3.88917	4.17405	3.82243	4.00673	METTL2A	17
ENSG00000088002	4.28031	1.43066	3.41963	4.26722	0.221804	0	0.715855	2.83707	0.852784	0.288593	0.758686	1.27477	SULT2B1	19
ENSG00000088035	3.63341	3.73269	3.51688	3.75606	3.5198	3.59176	3.51195	4.16193	3.2157	3.3491	4.21533	4.12882	ALG6	1
ENSG00000088038	6.64642	6.32687	6.41168	6.7478	6.06561	6.17428	6.14508	6.05088	6.07791	6.23662	6.3198	6.14493	CNOT3	19
ENSG00000088053	4.07024	0.885851	2.72171	2.38208	0.221804	0	0.715855	0	0.157225	0.528968	1.16704	0.685626	GP6	19
ENSG00000088179	3.28936	3.58762	3.70405	3.56698	3.36551	3.70401	3.411	3.64652	3.80847	3.52592	3.59349	4.10635	PTPN4	2
ENSG00000088205	5.3397	6.19116	5.79614	5.9368	6.37675	5.82295	5.87826	5.71342	5.79341	5.97994	5.89911	6.10439	DDX18	2
ENSG00000088247	7.97738	7.94269	7.82125	8.11378	8.14733	7.50886	7.84773	7.95183	7.92837	7.90921	8.10044	7.7365	KHSRP	19
ENSG00000088256	7.15286	6.81369	6.77575	6.86778	6.46624	5.96491	6.38355	6.48129	6.50843	6.57831	6.4281	6.49665	GNA11	19
ENSG00000088280	4.86224	5.32198	4.66893	5.07935	4.56083	5.92685	5.52671	5.40882	5.97867	5.98247	4.90321	5.57831	ASAP3	1
ENSG00000088298	5.20887	4.70109	5.38732	5.75094	5.2248	6.04525	5.23343	5.3005	5.7964	5.56662	5.72131	5.9218	EDEM2	20
ENSG00000088305	1.86118	2.50162	3.18824	3.04907	2.87091	2.90764	3.63642	3.45768	3.30244	3.09242	4.08022	3.39665	DNMT3B	20
ENSG00000088320	0	2.79389	1.47105	1.34025	0.997939	0	0.824521	1.72448	1.91202	1.07536	0.758686	1.23389	REM1	20
ENSG00000088325	4.72535	3.53583	4.241	4.37766	5.10452	4.93512	2.91706	5.83489	5.45392	4.50474	5.86526	4.22583	TPX2	20
ENSG00000088340	8.97199	3.10948	7.99904	8.43865	2.31863	4.88836	1.61158	5.53369	4.51581	3.9339	3.17418	4.69359	FER1L4	20
ENSG00000088356	5.02665	4.32745	4.1903	4.35083	4.02588	4.55081	4.68203	4.67709	4.47157	4.51176	4.79948	4.49165	PDRG1	20
ENSG00000088367	5.88086	5.63667	6.09673	4.96016	4.9809	4.0819	4.9751	4.71978	5.18381	5.08258	4.82788	4.87403	EPB41L1	20
ENSG00000088386	0	0.509876	1.85269	1.72156	0.735317	0	0	2.02603	0.428058	2.58077	0.758686	0.0943711	SLC15A1	13
ENSG00000088387	7.2308	7.86874	7.77469	8.09302	8.48373	6.3456	7.94421	7.62127	8.45591	7.78072	8.25221	8.43616	DOCK9	13
ENSG00000088448	7.24756	6.32687	7.24451	7.31331	6.43055	6.73286	6.60538	6.46884	6.24272	6.45628	6.63108	6.61778	ANKRD10	13
ENSG00000088451	3.15366	3.36827	3.44457	3.07115	3.45568	3.9666	3.42832	2.67298	3.31918	3.65833	3.65818	3.41505	TGDS	13
ENSG00000088543	0.908952	2.70289	2.42867	2.23334	2.36591	2.70671	3.05728	3.45768	1.8672	2.68381	1.91372	2.01507	C3orf18	3
ENSG00000088682	5.13872	4.99759	5.15402	4.92422	4.733	4.93512	4.92105	4.76123	4.79247	4.82522	4.99372	5.09271	COQ9	16
ENSG00000088726	6.42853	4.52633	5.79856	5.8145	4.01108	4.72057	4.63057	5.32835	4.36274	4.5257	4.95562	5.49642	TMEM40	3
ENSG00000088727	1.46224	2.38937	1.65322	2.78083	2.36591	1.56129	1.48485	2.27531	1.91202	1.7807	2.54687	1.91518	KIF9	3
ENSG00000088756	4.28031	5.33718	5.01943	5.46851	6.15916	3.87364	6.35213	5.64862	5.80534	6.0919	6.68641	6.45612	ARHGAP28	18
ENSG00000088766	2.83669	3.10948	2.50177	2.45107	2.26975	2.29347	2.27939	2.48781	2.39512	2.65873	2.24383	2.43135	CRLS1	20
ENSG00000088808	5.45964	5.96508	5.96291	6.08795	6.47705	3.9666	5.97868	4.95234	5.57385	5.91259	6.15587	6.20565	PPP1R13B	14
ENSG00000088812	5.54348	6.58436	6.45373	6.26123	6.04033	5.83943	6.4034	6.44359	6.33203	6.33686	6.38814	6.33329	ATRN	20
ENSG00000088826	1.46224	2.50162	2.09243	2.19363	2.99639	3.84127	3.16454	2.27531	4.91866	3.03511	2.44055	2.86528	SMOX	20
ENSG00000088827	6.00435	7.39981	6.71171	6.74265	6.43333	8.74688	8.35137	7.02302	7.77453	7.37582	6.33966	7.26405	SIGLEC1	20
ENSG00000088832	7.4494	8.00592	7.64758	7.47939	8.4797	7.0199	7.20939	6.84165	7.34977	7.45534	7.68812	7.51233	FKBP1A	20
ENSG00000088833	7.07986	6.67094	6.78798	7.01886	6.39396	6.78484	6.71884	6.91696	6.43353	6.73348	6.67473	6.656	NSFL1C	20
ENSG00000088854	4.62629	5.85315	5.13882	4.86224	5.32391	5.64687	5.5427	4.91609	5.55278	5.32102	4.90321	5.30001	C20orf194	20
ENSG00000088876	3.41339	3.73269	3.69369	3.17676	3.78625	3.02756	3.70909	2.27531	3.76025	3.88067	3.28074	3.59531	ZNF343	20
ENSG00000088881	3.99282	5.29107	4.43389	3.78307	4.84568	3.66756	5.24325	4.71978	4.54456	5.10131	4.26809	4.25677	EBF4	20
ENSG00000088882	4.94679	6.27253	5.01111	5.12229	6.04397	6.94952	7.56798	6.71023	8.00861	7.02107	5.57821	6.37619	CPXM1	20
ENSG00000088888	6.63373	7.23502	7.03986	7.24331	7.16583	6.92656	7.78271	6.97096	7.27452	7.3584	7.09112	7.3944	MAVS	20
ENSG00000088899	5.69782	3.42631	5.45331	5.65551	3.24424	3.70401	4.11423	3.45768	3.98669	3.59364	4.26809	4.12323	LZTS3	20
ENSG00000088930	5.7458	6.4509	6.23714	6.49359	6.76189	6.50389	6.46974	6.50589	6.5551	6.65798	6.22956	6.49988	XRN2	20
ENSG00000088970	3.82428	3.8645	3.86047	3.65733	4.17932	4.31189	4.64546	3.9631	4.2274	4.42519	4.17168	4.36958	KIZ	20
ENSG00000088986	6.5818	6.49225	5.76678	5.92775	6.10097	6.19364	5.2961	5.98242	5.76315	6.05634	6.60054	5.6902	DYNLL1	12
ENSG00000088992	3.28936	3.03681	3.09682	2.34631	3.64006	2.96885	2.49203	1.34279	2.75639	2.65873	2.8535	2.35716	TESC	12
ENSG00000089006	5.2427	6.12259	5.97365	6.10945	6.31485	6.78484	6.63925	6.194	6.60885	6.28863	6.45111	6.55797	SNX5	20
ENSG00000089009	8.60339	8.77362	8.26577	8.40427	8.64094	8.7115	8.46379	8.68647	8.57133	8.8009	8.69285	8.64132	RPL6	12
ENSG00000089022	5.13872	5.14315	5.36137	5.80465	5.62532	5.66548	5.18329	5.40882	5.29376	5.3009	5.14244	5.49642	MAPKAPK5	12
ENSG00000089041	3.91101	2.87949	3.12795	3.91101	4.12539	6.80596	4.30449	3.89022	4.86266	4.29291	3.76484	3.95736	P2RX7	12
ENSG00000089048	5.45964	5.39647	5.15402	5.36506	5.75529	5.87982	5.5935	5.62635	5.25078	5.58337	5.22483	5.15426	ESF1	20
ENSG00000089050	3.63341	3.24467	3.70405	3.29407	4.04052	3.55231	3.90742	3.89022	3.94416	3.75615	3.57686	3.79119	RBBP9	20
ENSG00000089053	6.73229	7.10778	6.98462	6.75805	6.78599	6.85542	7.25744	6.71023	6.78186	6.92706	7.00359	7.00403	ANAPC5	12
ENSG00000089057	7.80691	5.3066	7.29936	7.31908	5.17921	5.48869	5.64996	6.26777	5.90018	5.76765	5.52283	5.74032	SLC23A2	20
ENSG00000089060	5.51607	4.67738	5.03593	5.42201	5.19239	5.67469	5.17305	5.58077	5.45392	5.05401	4.80663	4.8707	SLC8B1	12
ENSG00000089063	5.72201	5.90511	5.26667	5.5256	5.75529	5.73759	5.31485	5.05592	5.469	5.72298	5.77699	5.64024	TMEM230	20
ENSG00000089091	0	1.64138	2.12364	1.82914	2.65949	1.56129	1.98379	1.34279	2.07859	2.1837	1.80365	1.72177	DZANK1	20
ENSG00000089094	5.2427	5.42522	5.59368	5.55332	5.36521	5.87183	5.79056	5.892	5.41162	5.3448	5.47425	5.4004	KDM2B	12
ENSG00000089123	3.91101	3.36827	3.95894	3.67186	3.8206	3.33707	3.44544	3.35311	3.60509	3.97511	3.8778	3.54607	TASP1	20
ENSG00000089127	3.99282	4.93899	3.8324	3.88631	4.01108	6.90715	4.62307	5.02221	5.02452	5.13353	4.319	4.90039	OAS1	12
ENSG00000089154	6.95275	7.53456	7.3992	7.49479	6.80541	7.05912	7.05066	7.3221	7.2788	7.12314	7.06004	7.44172	GCN1	12
ENSG00000089157	9.49501	9.50534	9.17121	9.22049	9.52564	9.47417	9.3003	9.8972	9.765	9.72289	9.78076	9.58367	RPLP0	12
ENSG00000089159	7.76095	8.47847	8.1606	8.21642	8.45873	7.77828	8.18999	7.77591	8.21947	8.27111	8.4728	8.58809	PXN	12
ENSG00000089177	3.99282	4.32745	3.49318	4.74351	4.24402	5.311	5.07747	4.33665	5.08938	4.50474	4.51511	4.50888	KIF16B	20
ENSG00000089195	4.51992	4.55263	4.16051	4.36877	4.30594	3.73957	4.00301	4.16193	3.96558	4.0348	4.18272	3.71896	TRMT6	20
ENSG00000089199	0	0.509876	0.641227	0.173336	0.872596	0.722808	2.24069	0.822287	1.02592	1.87081	1.33473	1.66138	CHGB	20
ENSG00000089220	7.16173	6.76391	6.44758	6.83104	6.70327	7.48549	7.13221	7.34273	7.42032	7.03454	7.5286	7.52615	PEBP1	12
ENSG00000089225	5.85921	6.49225	6.18631	5.14849	6.49577	1.97334	5.9339	5.48503	5.82306	5.66435	5.87889	4.45209	TBX5	12
ENSG00000089234	4.90513	5.09027	4.97733	5.34254	4.92675	4.93512	4.87757	5.21357	4.65418	4.99513	4.96204	4.97671	BRAP	12
ENSG00000089248	6.82455	6.50577	6.72195	7.01886	6.59831	7.43487	6.46555	7.02302	6.78035	6.82509	7.06303	7.0244	ERP29	12
ENSG00000089280	8.79231	8.92095	8.90259	8.68452	8.46077	8.41428	8.42549	8.45972	8.30914	8.38921	8.67244	8.10921	FUS	16
ENSG00000089289	5.43058	4.8779	4.82899	5.14849	5.01095	5.16172	5.57027	5.32835	5.47648	5.49049	5.52283	5.32941	IGBP1	X
ENSG00000089327	4.57408	4.83569	5.3841	5.59583	5.24391	5.8638	4.53785	4.58774	5.64529	5.33692	4.68772	4.83697	FXYD5	19
ENSG00000089335	5.76921	4.55263	5.88307	5.07935	4.87049	4.79004	5.47763	5.02221	4.51581	4.92324	3.93113	4.42056	ZNF302	19
ENSG00000089351	6.85769	6.63446	6.8181	7.02877	7.21022	6.87554	6.9672	6.49365	6.68831	6.34671	6.00238	6.13663	GRAMD1A	19
ENSG00000089356	3.28936	2.79389	2.1542	1.10364	0.872596	1.7121	2.73414	1.34279	2.07859	1.41189	1.55457	2.17479	FXYD3	19
ENSG00000089486	4.46365	4.76996	3.91501	3.93529	4.56083	4.55081	4.31384	3.64652	4.50853	4.55997	3.73516	4.04858	CDIP1	16
ENSG00000089505	0	1.98823	1.47105	1.1869	1.80441	1.97334	1.671	0	1.38514	1.68459	1.16704	1.23389	CMTM1	16
ENSG00000089597	8.79231	8.69168	8.81118	9.17342	8.64933	8.18202	8.54891	8.84911	8.62027	8.42311	8.90012	8.76552	GANAB	11
ENSG00000089639	2.83669	4.44443	3.76471	4.45527	5.37101	6.3798	5.02719	4.67709	5.48392	4.66445	3.99513	4.68981	GMIP	19
ENSG00000089682	3.732	3.42631	4.48886	4.38649	3.96577	4.46843	4.81967	4.28073	4.28818	4.2347	3.94416	3.97607	RBM41	X
ENSG00000089685	2.17336	3.30779	3.407	3.70047	4.39979	3.59176	2.16004	4.91609	4.05824	3.16545	5.06702	3.34959	BIRC5	17
ENSG00000089692	0	0.885851	1.26252	1.1869	1.49983	5.93454	1.27107	1.34279	2.87435	2.07416	2.8535	1.35321	LAG3	12
ENSG00000089693	7.01281	6.90328	6.87195	7.06498	6.76189	6.68806	6.82074	7.06501	6.89225	6.81803	7.10569	6.97564	MLF2	12
ENSG00000089723	4.77244	4.13201	3.51688	2.72621	1.66014	2.19445	2.49203	2.02603	2.03871	1.95562	2.32576	3.58722	OTUB2	14
ENSG00000089737	6.68385	7.20632	6.58848	6.78502	6.9808	7.41576	6.77747	7.17647	7.31368	6.98621	6.84417	6.95299	DDX24	14
ENSG00000089775	2.42986	3.48211	3.78438	3.64266	4.16603	4.73825	4.39538	4.22255	3.99713	3.60682	3.76484	4.21011	ZBTB25	14
ENSG00000089818	3.00386	4.23304	4.17548	4.39527	4.75979	4.84004	4.24707	3.64652	4.57276	4.45463	4.38737	4.51316	NECAP1	12
ENSG00000089820	6.95275	7.1122	6.90376	6.32694	6.94622	7.49332	7.10014	6.84165	6.64913	6.60973	6.15867	6.24089	ARHGAP4	X
ENSG00000089847	4.51992	3.10948	4.13776	4.70166	1.99691	3.47002	2.35381	3.24036	2.29712	2.89181	1.68448	2.64911	ANKRD24	19
ENSG00000089876	5.98448	4.91891	5.71136	5.9428	5.18581	4.90412	4.9751	5.24313	5.17003	5.22178	5.13678	5.24191	DHX32	10
ENSG00000089902	6.44316	6.51249	6.61755	6.73229	6.53508	6.4077	7.25986	6.73124	6.81026	6.95823	7.27381	7.72502	RCOR1	14
ENSG00000089916	4.86224	5.89487	5.49269	5.48505	5.79469	5.57979	5.56245	5.55742	5.62187	5.35264	5.74756	5.62451	GPATCH2L	14
ENSG00000090006	7.33642	8.06877	7.47679	6.8551	7.42496	6.60374	7.97695	7.87838	7.17572	7.56063	7.14994	7.19318	LTBP4	19
ENSG00000090013	5.30808	5.07221	4.77595	5.48916	5.08346	5.77234	5.53473	5.892	5.74468	5.75291	5.56982	5.457	BLVRB	19
ENSG00000090020	8.36689	6.73549	7.91623	8.54701	7.3925	7.1445	7.51424	7.62688	7.31472	7.59325	8.00497	8.15373	SLC9A1	1
ENSG00000090054	6.25702	5.99416	6.48412	6.64297	6.17252	5.82295	5.93995	6.17878	5.97339	6.07778	5.8924	6.14079	SPTLC1	9
ENSG00000090060	7.64554	7.86087	7.63138	7.92131	7.81394	7.71717	7.88898	7.71392	7.48573	7.79445	7.82385	8.00373	PAPOLA	14
ENSG00000090061	5.43058	5.73181	5.56269	6.04397	5.82884	6.06641	5.74635	5.87321	5.99178	5.71996	6.02708	5.93142	CCNK	14
ENSG00000090097	4.34405	4.47225	4.05112	4.42129	4.63025	2.96885	4.87126	3.73241	3.90033	4.41024	4.28867	4.61617	PCBP4	3
ENSG00000090104	0.908952	0.885851	1.85269	2.54873	5.42224	7.97943	3.8825	4.63311	7.10388	5.52212	3.52577	3.79119	RGS1	1
ENSG00000090238	6.97305	6.44389	6.54014	6.73575	6.3968	6.62291	6.65589	6.51804	6.48636	6.70007	6.71899	6.82809	YPEL3	16
ENSG00000090263	3.00386	3.77798	3.23187	3.34933	3.8206	3.9963	3.81825	4.28073	3.43121	3.6328	4.17168	4.02481	MRPS33	7
ENSG00000090266	5.10232	5.14315	4.35059	4.58372	4.93461	5.4782	4.75935	4.84074	4.78043	4.88591	5.35248	4.86736	NDUFB2	7
ENSG00000090273	6.64642	6.59072	6.36019	6.83427	6.57586	6.50905	6.43374	6.45627	6.47893	6.63727	6.62502	6.19504	NUDC	1
ENSG00000090316	7.07986	6.65282	6.55309	6.67577	5.84978	6.2807	6.42729	6.29625	5.99699	6.31295	5.61534	5.93142	MAEA	4
ENSG00000090339	4.40509	5.62433	5.39053	5.85643	8.35929	7.62749	6.23888	5.21357	7.33338	6.56319	6.33719	6.24218	ICAM1	19
ENSG00000090372	7.19668	6.89816	7.01303	7.30051	6.98648	6.48306	6.57848	6.74164	6.59173	6.58997	6.67473	6.60981	STRN4	19
ENSG00000090376	3.91101	5.19416	4.65831	3.79638	5.90283	6.05939	4.56943	4.58774	4.96726	4.34099	3.91798	4.06032	IRAK3	12
ENSG00000090382	3.732	4.32745	2.42867	4.14762	7.44986	10.3061	5.85923	5.67054	6.70274	6.24928	4.21533	4.39761	LYZ	12
ENSG00000090432	5.13872	5.56096	5.18394	5.8596	5.24391	5.33445	5.25786	5.15256	5.2288	5.2887	5.043	5.22637	MUL1	1
ENSG00000090447	3.15366	4.02338	3.64073	3.40255	3.58118	4.05393	4.19742	3.55519	3.77246	3.83662	3.75008	3.71154	TFAP4	16
ENSG00000090470	5.3397	5.27536	5.07638	5.1995	4.996	5.00983	5.43112	5.32835	5.47275	5.47979	5.42863	5.18675	PDCD7	15
ENSG00000090487	6.08116	5.92538	6.11238	6.62442	6.1956	6.42964	6.07257	6.39174	6.05311	6.18486	6.21081	6.22403	SPG21	15
ENSG00000090520	4.77244	5.41091	4.65297	4.97195	5.269	4.99519	4.33236	5.2721	5.16541	5.05401	6.64312	4.95801	DNAJB11	3
ENSG00000090530	4.72535	3.63761	4.42138	5.25843	4.72395	5.22581	5.27711	5.69214	5.1279	5.10131	5.44705	5.38181	P3H2	3
ENSG00000090539	3.99282	3.42631	3.91501	2.75378	3.75107	3.47002	3.32112	3.24036	3.97618	3.6328	3.47281	3.00547	CHRD	3
ENSG00000090565	6.48616	6.76391	6.31527	6.10143	6.43887	5.99464	6.4905	6.25331	6.35656	6.43797	6.11036	6.2188	RAB11FIP3	16
ENSG00000090581	6.28976	5.50819	5.98644	6.32465	6.01089	6.30464	6.05873	5.96478	6.18909	5.88582	5.91574	6.05831	GNPTG	16
ENSG00000090612	4.21363	4.32745	4.47683	4.58372	4.75979	4.23923	4.60795	4.84074	4.37079	4.38753	4.24722	4.47858	ZNF268	12
ENSG00000090615	7.14393	7.10778	7.10778	7.44598	6.57586	6.91883	6.91592	6.6889	6.86258	6.7499	6.5588	6.98028	GOLGA3	12
ENSG00000090621	7.25587	7.19801	6.96859	7.36114	7.46893	7.56196	6.95977	7.75554	7.62267	7.33287	7.83526	7.77351	PABPC4	1
ENSG00000090659	2.83669	4.97832	3.35534	4.0947	2.4991	5.50944	4.88387	2.67298	5.43485	3.72024	4.25769	5.12101	CD209	19
ENSG00000090661	2.83669	3.17865	1.47105	2.23334	2.11231	2.77685	3.47908	2.27531	2.75639	3.23497	2.40329	2.31858	CERS4	19
ENSG00000090674	4.81804	5.25948	5.16531	5.48505	5.21838	6.07339	5.75324	5.18339	5.75086	5.43987	4.92308	5.64998	MCOLN1	19
ENSG00000090686	6.20648	6.24053	6.43985	6.42237	6.22795	6.12808	6.34303	6.58883	6.20268	6.30892	6.59642	6.52869	USP48	1
ENSG00000090776	6.00435	6.71817	6.36672	6.76484	7.51028	5.16172	6.58622	5.79552	6.67212	6.58498	7.39738	7.09101	EFNB1	X
ENSG00000090857	6.04327	6.21606	6.75347	6.78168	5.64461	6.56958	6.44229	6.08394	6.28381	5.64851	5.84108	5.18943	PDPR	16
ENSG00000090861	7.26413	7.26714	7.16704	7.28524	7.35784	7.10074	7.01241	7.06501	7.051	7.11855	6.86829	7.04965	AARS1	16
ENSG00000090863	8.49525	7.92518	8.39011	8.99505	7.91078	7.94558	8.12374	8.16376	7.9963	8.05868	8.1077	8.30014	GLG1	16
ENSG00000090889	2.83669	2.87949	3.48118	3.25602	3.75107	2.38613	2.35381	4.49248	4.07804	3.18315	4.35846	2.85184	KIF4A	X
ENSG00000090905	6.04327	6.81912	6.67531	6.47508	6.14906	6.3456	6.60538	5.92885	6.70274	6.35063	6.60465	6.44161	TNRC6A	16
ENSG00000090924	6.32177	7.27111	7.27871	6.51792	7.81926	6.71063	6.52714	5.50957	6.81026	6.67372	7.77546	7.45401	PLEKHG2	19
ENSG00000090971	5.13872	4.13201	3.93274	3.25602	3.21871	2.90764	3.33955	3.55519	3.23347	3.59364	3.45471	3.33999	NAT14	19
ENSG00000090975	5.40091	5.69686	5.49866	5.89098	5.62045	3.93627	5.12605	3.9631	5.02452	5.32899	5.50974	5.35346	PITPNM2	12
ENSG00000090989	5.94392	5.62433	5.98219	6.09066	5.69639	6.14806	6.03348	6.10018	5.9085	5.86679	5.78787	5.98783	EXOC1	4
ENSG00000091009	3.00386	4.32745	3.91501	4.24796	4.29377	3.47002	3.79172	4.03247	4.01779	3.84776	4.25769	4.19421	RBM27	5
ENSG00000091039	4.77244	5.03538	5.30121	5.05739	5.86219	6.32233	5.63139	5.83489	6.10712	5.36432	5.6194	6.13108	OSBPL8	12
ENSG00000091073	4.07024	4.57846	4.26919	4.64389	4.30594	4.66617	4.54581	4.33665	4.49386	4.49769	3.91798	4.35058	DTX2	7
ENSG00000091106	1.46224	2.26764	1.73634	2.30963	4.30594	4.55081	3.62143	2.67298	3.99713	3.01549	2.01599	2.6017	NLRC4	2
ENSG00000091127	2.64757	3.63761	3.89706	3.47058	4.16603	3.13827	3.37571	2.98438	3.36826	3.74428	3.543	3.28101	PUS7	7
ENSG00000091128	2.64757	3.8645	3.48118	4.62908	3.38859	5.71097	5.55852	5.05592	4.41039	5.60978	3.89132	5.09842	LAMB4	7
ENSG00000091129	5.76921	4.67738	5.74938	6.23213	5.36521	4.98041	6.37911	5.79552	4.33008	5.10131	4.55812	5.06967	NRCAM	7
ENSG00000091136	9.03852	9.74228	9.58655	9.45059	9.97006	9.23897	9.96284	9.80234	10.2302	9.80876	9.8752	10.3258	LAMB1	7
ENSG00000091137	1.46224	1.64138	1.14573	1.01529	2.87091	0.406205	0.329964	0	2.33053	0.827876	0.186995	0.623679	SLC26A4	7
ENSG00000091140	5.7458	5.96508	5.90794	5.97244	6.24386	5.9422	6.04756	5.92885	6.07545	6.17163	6.01479	6.45723	DLD	7
ENSG00000091157	3.732	4.23304	4.04298	4.3235	4.49856	4.40341	3.94402	3.55519	4.33831	4.11995	4.17168	4.584	WDR7	18
ENSG00000091164	5.76921	5.61187	5.2205	5.63712	5.4717	5.42459	5.47763	5.46007	5.57385	5.75291	5.85495	5.79228	TXNL1	18
ENSG00000091317	6.02394	6.32687	6.23536	6.52992	7.01457	7.1211	7.05346	6.56562	6.86544	6.85989	7.11868	7.05992	CMTM6	3
ENSG00000091409	7.58088	8.19727	8.07835	8.43067	8.46892	7.57432	8.15008	8.24638	8.75479	8.33928	8.97464	9.2228	ITGA6	2
ENSG00000091428	1.86118	2.38937	3.28805	1.10364	2.05576	1.39286	1.41705	1.34279	1.72369	1.7807	1.48495	1.19181	RAPGEF4	2
ENSG00000091436	5.81491	6.51917	6.30849	5.56114	6.20863	5.1877	6.09985	6.35159	6.03041	6.11513	6.18909	6.1897	MAP3K20	2
ENSG00000091483	5.37063	5.4673	5.62673	5.55723	5.38256	5.09466	5.19852	5.79552	5.12314	5.02487	5.37671	5.20008	FH	1
ENSG00000091490	6.63373	6.5456	6.62302	6.90974	6.64697	6.48306	6.78421	6.91696	7.09904	6.74544	7.15975	7.53827	SEL1L3	4
ENSG00000091513	0.908952	1.43066	1.20531	1.1869	1.87147	1.97334	2.11795	0	1.10528	2.46981	1.62098	1.9408	TF	3
ENSG00000091527	6.89007	7.26714	6.97395	7.2518	7.7306	7.7127	7.40692	7.52225	7.48943	7.4975	7.69199	7.86964	CDV3	3
ENSG00000091536	1.46224	1.64138	1.14573	1.88007	1.49983	1.20212	0.715855	0	1.10528	1.07536	1.74529	1.31452	MYO15A	17
ENSG00000091542	5.69782	6.01322	6.01794	6.24917	5.90684	6.4566	5.96094	5.85418	6.14282	6.20449	6.57145	6.33812	ALKBH5	17
ENSG00000091592	5.64818	6.72974	6.13936	5.70225	6.16586	6.10781	5.92782	5.64862	6.18681	5.47621	6.02402	6.14768	NLRP1	17
ENSG00000091640	6.02394	5.70861	5.69846	5.80794	5.65417	5.62802	5.50646	5.38249	5.84345	5.79955	5.78063	5.97082	SPAG7	17
ENSG00000091651	2.42986	1.98823	3.21747	3.34933	3.31822	3.24109	2.58764	3.11804	3.71036	3.14754	4.16056	3.11083	ORC6	16
ENSG00000091704	1.86118	2.50162	2.74197	1.01529	2.65949	1.20212	2.73414	3.11804	2.48687	2.28551	2.06453	2.4846	CPA1	7
ENSG00000091732	3.00386	4.0967	3.70405	3.50344	3.76877	3.55231	3.81825	4.33665	3.60509	3.67093	2.88087	3.20902	ZC3HC1	7
ENSG00000091831	0	0	1.26252	0.595171	0.221804	1.56129	1.5496	1.72448	2.48687	0.734955	0.500975	0.856945	ESR1	6
ENSG00000091879	7.10767	5.82106	5.50756	7.3723	7.14903	2.29347	6.22656	6.194	3.80847	5.63572	3.52577	4.18352	ANGPT2	8
ENSG00000091947	4.46365	4.55263	4.3832	4.30498	4.59099	4.51021	4.34154	4.9877	4.43364	4.35667	4.74095	4.22583	TMEM101	17
ENSG00000091972	7.76678	4.81411	7.01198	7.81163	4.29377	3.59176	2.81539	6.05088	3.47669	3.6958	3.41782	4.02481	CD200	3
ENSG00000091986	5.02665	5.74327	5.78398	5.95175	5.7102	6.53963	5.80721	6.49365	6.87396	6.19143	6.72844	7.2209	CCDC80	3
ENSG00000092010	7.16173	6.49225	6.45066	6.60374	6.41378	7.86335	6.29426	6.6003	6.62577	6.79232	6.68447	6.39254	PSME1	14
ENSG00000092020	4.67667	4.74736	4.40242	4.3235	4.83732	4.96547	4.48088	4.67709	4.57276	4.77942	4.60809	4.60819	PPP2R3C	14
ENSG00000092036	1.46224	2.70289	1.88947	2.02287	2.80382	2.77685	2.9414	2.27531	2.57314	2.58077	3.08288	3.42417	HAUS4	14
ENSG00000092051	2.64757	1.64138	1.47105	0.712212	1.66014	0.982281	1.61158	0.822287	1.02592	1.07536	0.500975	1.01006	JPH4	14
ENSG00000092068	7.27234	5.3066	6.77329	7.45545	5.04766	6.22534	6.05315	6.01706	6.70751	5.76765	5.23547	5.9599	SLC7A8	14
ENSG00000092094	5.45964	5.17736	5.18394	5.56504	5.58092	5.46764	5.46089	4.95234	5.04479	5.16503	5.37671	5.40961	OSGEP	14
ENSG00000092096	4.34405	4.76996	4.77595	4.77748	3.85414	3.02756	3.89502	4.67709	3.64548	4.27651	4.47077	4.01881	SLC22A17	14
ENSG00000092098	0.908952	0.509876	1.01866	1.88007	0.735317	0.722808	1.19214	0	1.50703	1.82646	1.62098	0.685626	RNF31	14
ENSG00000092108	5.67321	5.64891	5.67494	5.96656	5.67778	5.4991	5.91559	5.85418	5.75702	5.81665	5.50974	5.80803	SCFD1	14
ENSG00000092140	2.83669	4.2652	4.13776	4.20866	4.66846	4.35838	4.29508	3.9631	4.49386	4.25993	4.51511	4.24138	G2E3	14
ENSG00000092148	7.16173	7.03036	7.57604	7.54792	6.87855	6.89931	7.09065	6.84165	7.26483	7.20229	7.13723	7.317	HECTD1	14
ENSG00000092199	8.43433	8.62043	8.36992	8.34263	8.74464	8.63921	8.25514	8.65107	8.33148	8.4259	8.7163	8.43701	HNRNPC	14
ENSG00000092200	0.908952	1.98823	1.60979	1.10364	2.21915	2.29347	2.64804	2.67298	2.29712	2.46981	3.60994	2.9307	RPGRIP1	14
ENSG00000092201	6.41375	6.67094	6.78432	7.0442	7.03665	6.72401	6.81746	6.8798	6.88805	6.87901	6.89538	6.71474	SUPT16H	14
ENSG00000092203	6.35309	6.14004	6.45833	6.56536	6.13889	6.14806	6.25596	5.92885	6.36263	6.19798	6.07526	6.18301	TOX4	14
ENSG00000092208	2.17336	1.98823	1.96034	2.27199	2.21915	2.29347	2.31708	2.83707	2.26292	2.49836	2.47686	2.4846	GEMIN2	14
ENSG00000092295	2.17336	1.18382	1.99452	2.02287	1.41246	1.7121	1.78297	1.72448	2.22789	2.14811	1.85973	1.91518	TGM1	14
ENSG00000092330	5.27576	5.27536	5.21326	5.49325	5.59587	5.46764	5.19346	5.24313	5.48763	5.42879	5.31285	5.12381	TINF2	14
ENSG00000092421	8.48115	7.66685	8.39971	8.46025	7.18078	7.59388	7.97106	7.63248	7.64192	7.57578	7.89351	8.31737	SEMA6A	5
ENSG00000092439	5.43058	5.39647	5.90569	6.25883	5.79469	5.92685	5.90325	5.96478	5.99699	5.70472	5.84456	6.15317	TRPM7	15
ENSG00000092445	5.10232	5.54795	5.04003	4.75037	5.10452	3.80816	5.37416	5.58077	5.11837	5.35655	4.32896	4.48295	TYRO3	15
ENSG00000092470	3.00386	2.70289	3.14326	2.9572	3.73315	2.90764	2.42457	4.67709	3.30244	3.09242	3.93113	2.94343	WDR76	15
ENSG00000092529	2.17336	2.13469	2.68032	1.97682	2.16672	2.38613	3.2053	2.98438	2.68068	2.07416	2.01599	2.29889	CAPN3	15
ENSG00000092531	7.13495	6.81912	6.97823	7.46799	6.8414	7.0556	6.60538	6.8985	6.64582	6.82368	6.44653	6.51062	SNAP23	15
ENSG00000092621	4.07024	3.17865	3.68325	4.17846	4.62053	4.55081	5.04975	5.05592	5.12314	5.11981	5.88566	5.63632	PHGDH	1
ENSG00000092758	2.42986	1.8252	2.45345	1.47886	2.21915	1.56129	1.48485	1.34279	2.48687	1.91384	2.54687	3.11083	COL9A3	20
ENSG00000092820	10.7733	10.0733	10.36	10.7571	9.44675	8.85215	9.45384	9.72456	9.24003	9.28115	9.63696	9.74897	EZR	6
ENSG00000092841	7.95203	7.84765	7.02857	7.71764	8.33277	8.14106	7.44571	7.68189	7.93314	8.08304	8.23243	7.74152	MYL6	12
ENSG00000092847	4.81804	4.8779	4.68993	5.38282	4.98847	5.02432	5.15755	4.58774	5.00396	5.37975	4.99997	5.33667	2001-08-01	1
ENSG00000092853	3.82428	3.10948	3.56316	3.40255	4.58101	4.21417	2.81539	4.44238	4.01779	3.05447	4.75581	3.13323	CLSPN	1
ENSG00000092871	3.63341	3.36827	3.39426	3.76963	3.8206	4.21417	3.83133	4.09865	4.1453	4.20036	4.18272	4.23622	RFFL	17
ENSG00000092929	8.27994	5.79926	7.61706	8.18702	5.56075	6.39661	4.99267	6.53008	5.60831	5.78224	5.27726	5.81498	UNC13D	17
ENSG00000092931	5.51607	4.0967	4.85712	5.34254	4.43347	4.68453	4.34154	4.58774	4.88532	4.76187	4.82788	5.04919	MFSD11	17
ENSG00000092964	6.48616	7.40343	6.77698	6.56147	7.55559	7.03428	6.88489	6.51804	6.85829	7.12886	6.71709	6.38672	DPYSL2	8
ENSG00000092969	4.28031	5.17736	4.28308	4.34178	4.34185	4.33532	3.52811	5.05592	4.90208	4.55997	3.83647	4.37898	TGFB2	1
ENSG00000092978	3.91101	3.90589	4.13776	4.42129	4.08358	3.51175	4.1249	4.03247	4.16395	4.07327	3.90471	4.01278	GPATCH2	1
ENSG00000093000	6.08116	5.77712	5.98644	6.31543	5.73292	6.12135	5.64996	5.892	6.00736	5.73503	6.03014	5.89419	NUP50	22
ENSG00000093009	1.46224	1.64138	2.68032	2.61035	2.96603	3.02756	1.671	2.48781	2.60079	2.34959	3.30114	2.06254	CDC45	22
ENSG00000093010	6.62092	6.70651	6.35691	6.60563	6.61553	6.82263	6.67052	6.55387	6.52656	6.73048	6.56725	6.92116	COMT	22
ENSG00000093072	3.63341	4.44443	3.76471	3.99427	5.05489	7.95884	5.14189	4.58774	5.76315	5.10131	3.30114	4.56352	ADA2	22
ENSG00000093134	4.28031	1.18382	2.83919	3.50344	1.11326	2.29347	1.10864	0.822287	1.18049	0.734955	0.186995	0.685626	VNN3	6
ENSG00000093144	5.64818	5.49469	5.53394	5.64818	5.81613	5.60892	6.17104	5.91054	5.82599	6.14026	5.8306	6.28283	ECHDC1	6
ENSG00000093167	5.85921	5.85315	5.86471	5.98412	6.00343	5.59928	5.60497	5.46007	6.15219	5.89122	5.61534	5.50504	LRRFIP2	3
ENSG00000093183	4.34405	4.99759	5.20234	4.82374	5.1525	4.42541	4.95731	5.43467	5.15146	5.29685	5.40054	5.06676	SEC22C	3
ENSG00000093217	0.908952	0.509876	1.60979	1.60531	2.11231	0.722808	1.19214	0.822287	2.26292	1.52723	2.11148	1.83544	XYLB	3
ENSG00000094631	6.30585	5.96508	6.64066	6.76822	6.04033	6.12808	6.20159	6.01706	5.86926	6.03457	6.05438	5.94573	HDAC6	X
ENSG00000094804	3.28936	3.10948	3.74477	3.82266	4.1925	3.47002	2.20093	3.24036	4.04823	3.28499	4.96843	3.2506	CDC6	17
ENSG00000094841	3.28936	3.63761	2.91252	2.54873	3.16626	3.87364	3.2053	3.81347	3.08477	3.3174	2.67744	3.46006	UPRT	X
ENSG00000094880	4.90513	5.74327	5.56554	5.40907	5.62045	4.9197	5.3195	5.50957	5.25514	5.41762	5.50974	5.53269	CDC23	5
ENSG00000094914	5.45964	5.33718	5.73176	5.49734	5.13213	5.34603	5.42682	5.40882	5.10877	5.30899	5.32784	5.39113	AAAS	12
ENSG00000094916	5.43058	5.79926	6.06894	5.95473	6.06561	5.26294	5.73247	5.99984	6.14986	5.85304	6.33966	6.18301	CBX5	12
ENSG00000094975	6.24037	5.77712	6.28625	6.51992	6.07631	6.02378	6.25353	5.99984	6.22728	6.24296	6.43735	6.6326	SUCO	1
ENSG00000095002	2.17336	4.89855	4.51852	4.65855	4.88679	4.0819	4.71063	5.24313	4.62081	4.99011	5.20332	4.81635	MSH2	2
ENSG00000095015	4.98727	5.19416	5.1578	5.0407	5.42782	5.36892	5.7114	5.24313	5.53139	5.40636	5.69842	5.73484	MAP3K1	5
ENSG00000095059	3.15366	2.70289	2.45345	3.15625	1.99691	2.08813	2.55647	2.02603	2.07859	1.99623	1.80365	2.10849	DHPS	19
ENSG00000095066	7.85145	6.14004	7.55186	7.81981	5.68712	6.35136	6.74154	7.11384	6.00736	6.05634	6.33966	6.32966	HOOK2	19
ENSG00000095139	6.73229	6.57155	6.85925	7.29817	7.02933	6.81432	6.74327	6.85128	7.04094	6.94273	6.84764	7.01764	ARCN1	11
ENSG00000095203	3.732	2.9603	2.96516	2.90897	2.99639	2.84373	3.55989	2.98438	2.70636	2.75652	3.12925	3.11083	EPB41L4B	9
ENSG00000095209	0.908952	1.98823	2.76194	2.80739	2.65949	2.633	2.35381	3.35311	2.85152	2.3179	3.03497	2.78266	TMEM38B	9
ENSG00000095261	4.21363	4.76996	4.67421	4.22844	4.97329	4.87244	4.94532	4.03247	4.74989	5.09665	4.88305	4.37429	PSMD5	9
ENSG00000095303	2.42986	3.03681	2.65918	3.40255	4.20555	4.9197	4.20749	4.22255	3.97618	3.89147	2.79717	3.02956	PTGS1	9
ENSG00000095319	4.98727	5.52156	5.64029	5.5415	5.78603	5.6562	5.42251	5.2721	5.7964	5.35264	5.78425	5.72381	NUP188	9
ENSG00000095321	6.32177	5.21077	5.39053	5.46434	5.18581	5.56995	5.87511	5.92885	5.68781	5.73203	4.64047	5.81151	CRAT	9
ENSG00000095370	5.54348	6.51917	5.89669	5.11699	6.13549	4.0819	5.19852	3.9631	4.98834	5.05881	5.17043	5.31233	SH2D3C	9
ENSG00000095380	4.57408	4.32745	4.50673	4.70166	5.04766	5.55006	4.6602	4.80153	5.45013	5.01502	5.6634	5.18675	NANS	9
ENSG00000095383	4.67667	4.29666	4.42138	5.23417	4.60091	5.68385	5.01578	4.8789	5.36804	4.98002	4.68772	5.14326	TBC1D2	9
ENSG00000095397	0.908952	2.50162	2.70117	2.80739	2.80382	4.68453	3.86988	3.89022	4.76829	3.23497	3.45471	3.61136	WHRN	9
ENSG00000095485	5.13872	4.62877	4.23386	4.62908	4.77739	4.96547	4.56943	4.44238	4.53743	4.51875	4.56657	4.61617	CWF19L1	10
ENSG00000095539	4.28031	2.60576	3.34213	3.78307	2.69695	2.96885	4.14599	3.9631	3.74794	4.17405	3.93113	5.39113	SEMA4G	10
ENSG00000095564	5.10232	5.50819	5.93898	5.65551	5.53512	5.99464	5.89081	4.71978	5.55984	5.45087	5.29262	5.64609	BTAF1	10
ENSG00000095574	4.34405	4.29666	4.62051	4.81068	4.36531	4.64757	4.40416	4.39049	4.71868	4.72005	4.82083	4.71602	IKZF5	10
ENSG00000095585	2.64757	3.68594	3.82292	4.22844	3.36551	4.90412	4.29508	4.28073	4.20055	4.37987	4.19367	4.54693	BLNK	10
ENSG00000095587	0.908952	0.509876	1.60979	1.01529	0.414007	0	1.41705	1.72448	1.38514	0.528968	1.16704	1.99074	TLL2	10
ENSG00000095596	0	1.18382	0.45744	0.595171	0	2.19445	0.174395	0	1.56432	0.635635	1.55457	0.685626	CYP26A1	10
ENSG00000095637	7.17931	6.63446	6.98143	7.13479	6.27515	5.97985	6.5707	5.69214	6.16151	6.32893	6.01169	6.53501	SORBS1	10
ENSG00000095739	4.94679	5.14315	4.84312	4.71574	5.25651	4.73825	5.12605	5.94693	5.3106	6.01495	5.90578	5.49426	BAMBI	10
ENSG00000095787	7.5609	7.21046	7.28821	7.6422	7.4526	7.18375	7.20689	7.48562	7.32615	7.46441	7.49136	7.34186	WAC	10
ENSG00000095794	5.43058	6.28042	5.81299	5.92169	6.44713	5.21322	6.31303	5.46007	6.26233	6.15154	6.53531	6.87371	CREM	10
ENSG00000095906	5.83723	5.4673	5.27016	5.07389	4.92675	4.73825	5.36968	5.58077	4.98834	5.02977	4.99997	4.95486	NUBP2	16
ENSG00000095951	4.46365	4.41606	4.40242	4.99523	5.57591	4.93512	4.52985	3.89022	4.74989	4.76187	4.99997	4.91985	HIVEP1	6
ENSG00000095970	2.17336	1.64138	1.81494	1.92925	3.16626	4.64757	3.30245	4.03247	4.1453	3.64562	2.76816	3.95106	TREM2	6
ENSG00000096060	5.94392	6.30383	5.68805	5.35609	7.95009	7.84101	5.73247	5.18339	7.76157	5.82513	5.1537	4.96427	FKBP5	6
ENSG00000096063	5.85921	5.19416	5.85777	6.2708	5.43338	5.4782	5.20858	5.67054	5.49502	5.2805	5.03693	5.52636	SRPK1	6
ENSG00000096070	5.48813	5.76593	5.76678	6.09336	5.91878	5.41363	5.95796	6.08394	6.06556	5.96468	6.07229	6.11287	BRPF3	6
ENSG00000096080	3.732	3.98527	3.8697	4.10544	4.25662	4.33532	3.89502	4.84074	3.68476	4.14726	4.42504	4.03675	MRPS18A	6
ENSG00000096092	1.46224	2.50162	3.04885	2.93328	2.62104	3.08398	3.01203	2.48781	3.04507	3.3174	3.60994	3.26081	TMEM14A	6
ENSG00000096093	4.14372	4.74736	5.25262	4.65855	4.42233	3.59176	4.71063	4.03247	4.31347	4.41774	4.29885	4.34579	EFHC1	6
ENSG00000096384	9.54163	10.1185	9.40334	9.80804	10.2753	10.0407	9.58682	10.2318	10.3711	10.2975	11.2946	10.2658	HSP90AB1	6
ENSG00000096401	5.7458	5.87416	5.70105	6.0798	6.02569	5.78941	5.72197	6.0675	6.06804	6.06113	6.05738	5.97082	CDC5L	6
ENSG00000096433	5.94392	6.37187	5.20963	4.79749	5.17258	5.54001	5.62389	5.38249	5.61511	5.35655	5.30277	4.51743	ITPR3	6
ENSG00000096654	3.41339	2.70289	3.21747	2.93328	3.24424	3.33707	2.73414	3.24036	3.47669	3.41048	4.16056	3.3206	ZNF184	6
ENSG00000096696	8.3592	9.02441	8.71487	8.92061	8.16581	8.03951	8.78742	8.56003	8.52878	8.66111	9.24952	9.58811	DSP	6
ENSG00000096717	4.51992	5.01661	4.83843	5.22435	4.94243	5.03866	5.07747	5.55742	5.20648	5.39502	5.84803	5.34868	SIRT1	10
ENSG00000096746	7.60709	8.129	7.74865	7.74709	7.94621	7.50628	7.69597	7.86892	7.55891	7.87287	8.24762	7.75422	HNRNPH3	10
ENSG00000096872	4.14372	3.77798	3.98467	3.51959	3.99613	3.59176	4.34154	3.81347	3.82028	4.2347	4.35846	4.00065	IFT74	9
ENSG00000096968	4.98727	5.52156	5.19868	5.15883	5.71933	7.12782	5.90944	6.03407	6.17766	5.81382	4.79229	5.05214	JAK2	9
ENSG00000096996	0	2.60576	1.77618	1.77635	2.69695	5.1877	2.67731	3.24036	3.23347	2.84811	1.68448	2.06254	IL12RB1	19
ENSG00000097007	6.52793	6.99723	6.43519	6.50175	6.82669	6.73726	7.2416	6.86085	7.14084	7.0611	6.87511	7.1985	ABL1	9
ENSG00000097021	4.21363	3.58762	4.00995	4.30498	4.31801	3.9963	2.73414	4.33665	3.69762	3.53972	3.75008	3.11083	ACOT7	1
ENSG00000097033	6.30585	6.89816	6.60517	6.59615	7.10617	6.82677	6.72411	6.9261	6.90894	6.86538	6.62906	6.87621	SH3GLB1	1
ENSG00000097046	4.46365	3.48211	4.13776	3.89872	4.659	3.70401	3.751	3.45768	3.93333	3.65833	4.28867	3.89317	CDC7	1
ENSG00000097096	3.732	2.87949	3.28805	3.93529	3.05526	3.70401	3.26437	4.71978	4.28818	3.9339	4.25769	4.3069	SYDE2	1
ENSG00000099139	4.51992	5.32198	4.19765	3.50344	4.09765	3.84127	4.11423	3.24036	3.56355	4.11995	4.99372	4.58806	PCSK5	9
ENSG00000099194	3.82428	5.14315	3.71434	3.86119	5.03309	5.38023	3.46235	3.11804	4.05824	4.26825	5.6194	5.25474	SCD	10
ENSG00000099203	5.79224	4.95879	5.04819	5.30576	4.854	4.48947	4.49739	5.32835	4.87404	4.73212	5.10812	4.98597	TMED1	19
ENSG00000099204	6.30585	7.13414	6.66208	6.09874	6.91278	4.55081	6.23396	5.46007	6.30497	6.71991	6.48047	6.54549	ABLIM1	10
ENSG00000099219	4.77244	5.05391	5.28404	4.68743	5.13895	5.22581	5.07747	5.3005	5.75394	4.96476	5.85495	6.16137	ERMP1	9
ENSG00000099246	6.1541	6.30383	6.27239	6.40509	6.22795	6.16777	6.06705	6.32419	6.32376	6.22172	5.96452	6.16001	RAB18	10
ENSG00000099250	8.2428	8.98391	8.61818	8.66469	8.55558	8.11422	8.5499	8.48469	8.7494	8.57115	8.72056	8.98964	NRP1	10
ENSG00000099251	0.908952	0.509876	1.65322	1.41122	3.05526	2.08813	2.58764	0.822287	1.9555	1.73345	1.74529	1.72177	HSD17B7P2	10
ENSG00000099256	2.42986	2.13469	2.24215	1.41122	1.80441	1.20212	2.38962	1.72448	2.11739	2.03572	1.68448	1.88908	PRTFDC1	10
ENSG00000099260	5.96435	6.72974	6.04468	5.22435	6.07986	3.38276	4.9393	4.63311	6.14986	5.56324	5.53149	5.4004	PALMD	1
ENSG00000099282	4.98727	5.64891	5.69846	6.38098	6.81396	3.84127	5.75667	5.05592	6.01251	5.7735	5.6634	5.38415	TSPAN15	10
ENSG00000099284	2.42986	2.79389	2.52533	1.01529	1.99691	2.4732	2.76173	2.02603	3.00424	2.65873	2.20105	2.01507	MACROH2A2	10
ENSG00000099290	5.88086	5.93541	6.03651	5.94878	6.23752	6.60856	6.2041	6.31029	6.19136	6.41007	6.07821	6.26138	WASHC2A	10
ENSG00000099308	3.99282	4.44443	4.31723	4.31427	4.89487	5.4991	5.30081	4.58774	4.97256	4.71398	4.14935	4.16732	MAST3	19
ENSG00000099326	6.30585	5.91528	5.98219	6.14632	5.38256	5.28717	5.73247	5.48503	5.08938	5.15161	4.85573	5.058	MZF1	19
ENSG00000099330	4.07024	3.58762	3.59691	3.51959	3.43366	3.47002	4.02595	3.81347	3.54943	3.45486	3.41782	3.35913	OCEL1	19
ENSG00000099331	7.37508	7.62099	7.55544	7.90833	7.99777	8.595	8.05152	7.80098	8.22559	7.81871	7.72916	8.03046	MYO9B	19
ENSG00000099337	4.72535	5.76593	4.58731	4.94828	5.42782	5.99464	5.85283	5.46007	5.90018	5.52212	5.10812	5.05214	KCNK6	19
ENSG00000099338	1.46224	2.13469	2.37779	2.69811	2.31863	1.97334	2.11795	1.72448	2.68068	1.58161	2.32576	2.21735	CATSPERG	19
ENSG00000099341	7.25587	6.40111	6.47204	6.95646	6.51162	6.51419	6.18894	6.77238	6.73428	6.48688	6.4715	6.19504	PSMD8	19
ENSG00000099364	6.33752	5.8637	5.75188	5.87538	5.42782	5.21322	5.50646	6.05088	5.49502	5.61956	5.65153	5.81671	FBXL19	16
ENSG00000099365	3.99282	1.18382	3.14326	2.98072	1.11326	1.39286	0.824521	1.34279	1.18049	0.413781	1.25332	1.35321	STX1B	16
ENSG00000099377	2.42986	2.9603	2.68032	3.11433	2.76907	4.5903	3.2053	3.35311	4.13588	3.45486	2.70832	3.04145	HSD3B7	16
ENSG00000099381	6.11809	5.90511	5.92354	6.27319	5.92668	5.28717	5.75324	5.43467	5.55984	5.71996	5.8376	5.64998	SETD1A	16
ENSG00000099385	5.10232	4.83569	4.50673	4.63651	4.84568	4.68453	4.64546	5.21357	4.85694	4.93895	4.7484	4.49598	BCL7C	16
ENSG00000099622	8.65141	8.55689	8.35479	8.17942	7.51028	7.89128	8.69159	8.09247	7.76081	8.02841	7.84049	7.70599	CIRBP	19
ENSG00000099624	6.06234	5.21077	5.01943	5.00099	4.58101	4.82357	4.60032	5.15256	4.78646	4.65813	4.97479	4.56352	ATP5F1D	19
ENSG00000099715	0	1.8252	0	0.173336	1.66014	0	0	0	0	0.151501	0	3.28101	PCDH11Y	Y
ENSG00000099725	0	5.8102	0	0	4.75092	0	0	0	0	0	0	4.8707	PRKY	Y
ENSG00000099783	8.22175	8.46987	8.19728	8.33695	8.52792	8.10061	7.86134	8.38875	7.88687	8.2487	8.50284	7.97959	HNRNPM	19
ENSG00000099785	4.51992	5.21077	4.31723	4.47197	4.76862	5.457	5.08841	4.33665	4.79845	4.75597	4.47077	4.28205	MARCHF2	19
ENSG00000099795	5.45964	5.10812	4.28308	4.64389	4.58101	5.16172	4.60032	4.63311	4.39468	4.68322	4.72594	4.40683	NDUFB7	19
ENSG00000099797	7.21384	5.66105	6.61755	7.43856	5.64461	6.44587	6.32233	6.50589	6.10471	6.09891	6.47823	6.60581	TECR	19
ENSG00000099800	4.86224	4.97832	4.70032	4.51288	4.74198	4.79004	4.75249	5.46007	4.59355	4.85312	4.86261	4.87735	TIMM13	19
ENSG00000099804	6.30585	6.10493	5.76183	5.58052	5.82038	5.5197	5.62764	5.892	5.55984	5.93626	5.81649	5.57012	CDC34	19
ENSG00000099810	5.40091	4.81411	5.07239	5.15883	5.08346	5.00983	4.85853	4.67709	5.08938	4.98002	4.79948	5.1921	MTAP	9
ENSG00000099812	0	0	0	2.1528	0.872596	0.722808	1.10864	0.822287	1.61943	2.75652	2.15696	1.91518	MISP	19
ENSG00000099814	5.85921	5.76593	5.76183	5.92775	5.52994	5.5197	5.33336	5.40882	5.74777	5.83356	5.54438	5.66736	CEP170B	14
ENSG00000099817	6.55511	6.84595	6.4796	6.70431	6.48242	6.78909	6.48431	6.86085	6.56039	6.71231	6.749	6.51169	POLR2E	19
ENSG00000099821	5.62271	5.53482	5.69586	5.60721	5.4717	5.27511	5.40073	5.64862	5.21991	5.30495	4.95562	5.22376	POLRMT	19
ENSG00000099840	2.83669	1.43066	1.92534	1.60531	0.997939	1.84862	2.11795	0.822287	1.61943	1.35058	1.96576	1.31452	IZUMO4	19
ENSG00000099849	5.13872	3.24467	4.17548	4.65124	3.16626	4.13627	3.07938	4.22255	3.60509	3.65833	3.52577	3.80521	RASSF7	11
ENSG00000099860	6.97305	7.52795	6.19552	6.52393	7.91476	8.10913	6.16846	7.65465	8.07664	7.85297	9.42038	8.47094	GADD45B	19
ENSG00000099864	6.47197	6.76953	5.94773	5.50141	5.98083	5.05287	6.50282	6.4308	6.10229	6.62599	6.01479	5.97082	PALM	19
ENSG00000099869	4.21363	4.60383	4.1903	3.58244	4.04052	1.7121	4.00301	2.48781	3.82028	3.9022	3.68947	3.61136	IGF2-AS	11
ENSG00000099875	8.28401	7.23908	6.97074	7.45964	7.01086	7.32504	7.19302	6.72077	7.34365	7.52724	7.20375	7.2792	MKNK2	19
ENSG00000099889	5.06498	4.2652	4.75118	5.53357	5.12528	4.46843	5.19346	5.60374	4.4413	5.10596	4.3487	4.55939	ARVCF	22
ENSG00000099899	5.54348	5.10812	5.47767	5.52959	5.17921	5.34603	5.41384	5.18339	5.10877	5.05881	4.77781	5.20008	TRMT2A	22
ENSG00000099901	5.94392	6.11379	5.76678	5.74751	5.9694	5.77234	5.28188	6.35159	5.62524	5.65487	5.87209	5.47466	RANBP1	22
ENSG00000099904	5.67321	5.8637	5.84378	5.51758	5.82038	5.23829	5.76692	5.73439	5.53497	5.67376	5.56982	5.7476	ZDHHC8	22
ENSG00000099910	5.13872	4.41606	4.54182	4.62162	3.88692	3.80816	4.23728	4.84074	4.28818	4.14726	3.85038	4.63199	KLHL22	22
ENSG00000099917	7.77836	7.15575	7.62117	8.06441	7.28284	7.55699	7.30978	7.31515	7.35282	7.29472	7.39263	7.48265	MED15	22
ENSG00000099940	5.83723	5.21077	5.12346	5.67005	5.2312	5.9422	5.68642	5.43467	5.63864	5.56662	5.55291	5.37477	SNAP29	22
ENSG00000099942	6.09975	6.44389	6.16958	6.56536	6.46624	6.31646	6.34303	6.54202	6.48636	6.57998	6.91867	6.78629	CRKL	22
ENSG00000099949	3.91101	3.8645	3.67274	3.75606	4.16603	3.80816	4.18728	2.83707	3.47669	3.28499	3.73516	3.40588	LZTR1	22
ENSG00000099953	9.16302	3.94613	9.44564	9.24346	3.56101	5.82295	4.61553	6.3651	6.07545	5.06837	3.21776	5.44586	MMP11	22
ENSG00000099954	4.86224	3.17865	4.59846	4.68743	3.43366	2.77685	4.15642	4.44238	3.40008	3.95465	3.57686	5.08985	CECR2	22
ENSG00000099956	7.15286	5.73181	6.84176	7.13872	5.85393	6.10099	6.03065	6.13214	6.15686	6.14479	6.12474	5.86101	SMARCB1	22
ENSG00000099957	1.46224	2.87949	2.40345	1.82914	1.66014	1.56129	3.16454	2.27531	1.77313	2.41095	1.85973	2.82456	P2RX6	22
ENSG00000099958	4.57408	0.885851	4.41509	4.52893	1.11326	2.29347	1.3459	3.24036	1.99771	1.68459	1.91372	1.14848	DERL3	22
ENSG00000099960	5.43058	2.79389	4.42138	5.27755	1.31945	2.77685	2.52461	2.98438	3.14234	2.75652	3.36066	3.2506	SLC7A4	22
ENSG00000099968	5.48813	6.09602	5.61305	5.98993	5.73742	5.76373	5.63139	5.67054	5.76008	5.8475	5.74756	5.8991	BCL2L13	22
ENSG00000099974	3.15366	0	0.246775	1.82914	1.11326	0.722808	1.5496	0	1.18049	0	0.977264	0.345282	DDTL	22
ENSG00000099985	2.17336	3.17865	1.69538	2.06749	4.75979	4.18867	0.715855	2.27531	4.41818	3.64562	1.85973	1.63022	OSM	22
ENSG00000099991	6.42853	6.39386	6.32872	6.71487	6.48242	6.51932	6.48844	5.94693	6.09502	6.21743	6.05738	6.33812	CABIN1	22
ENSG00000099992	5.64818	4.41606	5.01528	5.48505	4.29377	4.68453	4.27607	4.28073	4.40256	4.43261	4.54962	4.62014	TBC1D10A	22
ENSG00000099994	3.732	2.9603	3.43215	2.6402	3.11183	2.4732	2.27939	3.89022	2.80474	2.63321	2.51229	3.71896	SUSD2	22
ENSG00000099995	7.09846	6.88786	6.86965	7.32943	7.14734	6.93426	7.10957	7.08963	7.11949	7.15263	7.05103	6.91309	SF3A1	22
ENSG00000099998	4.34405	3.68594	3.64073	2.23334	4.54037	5.69294	2.96533	3.11804	5.13264	3.56693	2.64589	2.95606	GGT5	22
ENSG00000099999	5.43058	4.65328	4.26919	4.10544	3.85414	4.33532	4.18728	4.44238	4.27108	4.11074	4.26809	3.96986	RNF215	22
ENSG00000100003	0	1.64138	0.950661	0.712212	1.22004	1.97334	0.598332	1.34279	1.56432	1.52723	1.25332	1.14848	SEC14L2	22
ENSG00000100014	5.43058	5.09027	5.35151	5.23905	4.46638	4.55081	4.67479	4.44238	4.41039	4.71398	4.59988	4.73079	SPECC1L	22
ENSG00000100023	6.65901	5.61187	6.72577	6.86462	5.799	5.8638	6.22408	5.94693	5.80831	5.79092	5.69457	5.73301	PPIL2	22
ENSG00000100027	1.86118	3.17865	2.12364	3.43697	3.71501	2.90764	3.28354	3.24036	3.17948	3.42542	2.88087	3.20902	YPEL1	22
ENSG00000100028	4.14372	4.74736	4.48886	4.69456	5.12528	4.68453	5.11539	4.63311	4.53026	5.02977	4.92308	4.77064	SNRPD3	22
ENSG00000100029	6.44316	6.22426	5.84378	5.86277	6.25959	6.18722	5.86242	6.13214	6.03041	5.92841	6.00238	5.7993	PES1	22
ENSG00000100030	6.09975	6.60335	6.41326	6.09874	6.83931	6.17428	6.26563	6.05088	6.56741	6.35258	6.1781	6.35132	MAPK1	22
ENSG00000100034	7.12592	8.20143	7.15008	7.31678	7.79247	5.87982	7.42645	6.79251	6.95519	7.32691	7.2359	7.60842	PPM1F	22
ENSG00000100036	0	2.60576	0.804224	0.820467	1.99691	1.97334	1.10864	0.822287	1.44737	1.58161	2.15696	1.35321	SLC35E4	22
ENSG00000100038	4.98727	4.76996	5.06838	5.54545	4.95794	5.03866	5.44821	4.76123	4.94046	4.80822	4.65639	5.05507	TOP3B	22
ENSG00000100055	5.57038	6.65282	5.95425	6.15151	6.89678	7.84101	7.35578	6.94421	6.91995	6.95308	5.74011	6.09158	CYTH4	22
ENSG00000100056	4.72535	4.60383	4.31046	4.38649	4.06937	4.31189	4.15642	4.28073	4.50853	4.29291	4.71838	4.20483	ESS2	22
ENSG00000100058	3.28936	3.58762	3.9239	3.67186	3.38859	3.24109	3.4956	2.67298	3.59138	2.93423	2.90772	2.95606	CRYBB2P1	22
ENSG00000100060	5.06498	6.28826	5.51346	3.72853	5.01095	4.84004	4.03729	3.35311	4.56576	4.04452	4.76318	4.78839	MFNG	22
ENSG00000100065	3.732	5.57386	4.73105	3.70047	5.03309	1.56129	4.34154	2.48781	4.02801	4.04452	5.30277	5.43688	CARD10	22
ENSG00000100068	0	2.70289	2.45345	2.1528	1.73408	3.08398	2.706	1.34279	3.14234	2.46981	2.40329	2.37607	LRP5L	22
ENSG00000100075	6.13621	5.87416	5.78398	5.37397	5.18581	5.8476	5.51459	5.96478	6.03549	5.39122	5.95167	5.86938	SLC25A1	22
ENSG00000100077	3.41339	4.13201	4.04298	3.93529	4.58101	5.76373	4.6602	3.73241	4.89652	4.46913	3.56003	4.45654	GRK3	22
ENSG00000100083	6.77916	6.53904	6.87309	7.24088	6.48777	6.75908	6.75361	6.33795	6.65409	6.33686	6.3223	6.50741	GGA1	22
ENSG00000100084	2.17336	3.10948	3.06502	2.85907	2.90332	2.70671	2.91706	2.02603	2.62791	2.84811	2.70832	2.87861	HIRA	22
ENSG00000100092	3.28936	2.26764	2.54852	3.29407	3.6207	4.9197	3.86988	2.67298	3.59138	3.26851	3.21776	3.44223	SH3BP1	22
ENSG00000100097	6.83568	7.01152	5.43476	5.73719	7.32532	6.47253	5.66466	6.77238	6.68186	6.45263	6.6351	5.97703	LGALS1	22
ENSG00000100099	5.17422	5.35223	5.44097	5.70225	5.25651	5.40258	5.71493	5.62635	5.54568	5.26812	5.49654	5.70524	HPS4	22
ENSG00000100100	4.51992	5.59931	5.19133	5.52159	5.46629	6.49351	6.41648	6.14785	6.3196	5.90728	5.87889	6.85277	PIK3IP1	22
ENSG00000100104	3.15366	3.77798	3.59691	3.86119	4.30594	3.70401	3.9797	3.35311	3.723	3.86978	3.67391	3.85324	SRRD	22
ENSG00000100105	4.86224	5.05391	4.68471	4.60658	4.59099	4.85633	4.79985	5.02221	4.64756	4.90203	4.71078	4.68603	PATZ1	22
ENSG00000100106	7.91054	7.62099	7.70417	7.64128	7.57584	7.37395	7.72254	7.87366	7.54563	7.51507	7.50571	7.56427	TRIOBP	22
ENSG00000100109	5.37063	5.38187	5.3148	5.57666	5.21192	5.311	5.26751	4.95234	5.23322	5.2132	5.1537	5.24191	TFIP11	22
ENSG00000100116	0.908952	2.50162	2.0279	2.19363	1.58221	1.97334	1.671	3.11804	2.07859	1.91384	2.61363	2.72482	GCAT	22
ENSG00000100122	0.908952	2.50162	1.65322	2.11078	2.69695	2.77685	2.78881	3.11804	2.48687	2.73269	2.67744	2.51904	CRYBB1	22
ENSG00000100124	3.15366	3.58762	4.05921	3.97097	3.73315	4.16271	3.751	3.89022	4.0075	4.21763	4.05641	4.13993	ANKRD54	22
ENSG00000100129	6.33752	6.31923	6.20285	6.37434	6.49842	6.16123	6.5707	6.8798	6.38665	6.66114	6.89538	6.78629	EIF3L	22
ENSG00000100138	5.98448	5.67309	5.12732	5.31041	5.67778	5.33445	5.12073	4.95234	5.49869	5.51515	5.67517	5.40961	SNU13	22
ENSG00000100139	7.62002	7.22688	7.32056	7.65414	7.09744	6.45125	7.10554	7.17647	6.9034	7.20662	7.14007	7.56684	MICALL1	22
ENSG00000100142	4.90513	4.23304	3.86047	4.3235	4.35363	4.77299	4.23728	4.71978	4.42593	4.32514	4.80663	4.4742	POLR2F	22
ENSG00000100147	3.00386	3.90589	3.52859	3.83561	3.54055	3.84127	4.50557	3.35311	3.65869	4.11074	4.67214	4.31672	CCDC134	22
ENSG00000100150	4.21363	3.10948	4.33067	4.45527	3.60108	3.90529	4.07077	3.81347	3.86657	3.96492	3.89132	3.70407	DEPDC5	22
ENSG00000100151	6.02394	5.22719	5.68544	5.85643	4.75979	5.06693	5.22354	5.38249	5.01941	4.91797	4.92965	5.33667	PICK1	22
ENSG00000100154	5.43058	6.49225	5.96291	5.5415	5.92668	4.60964	5.98747	5.85418	5.61511	5.89927	5.82708	6.07865	TTC28	22
ENSG00000100162	1.46224	1.98823	2.06052	2.02287	2.76907	2.38613	1.3459	3.24036	2.03871	1.73345	2.61363	1.63022	CENPM	22
ENSG00000100167	3.82428	3.03681	3.3288	3.41986	3.45568	3.28988	2.55647	4.09865	3.63214	3.42542	3.67391	3.41505	SEPTIN3	22
ENSG00000100181	5.72201	2.87949	5.57121	6.13588	3.60108	3.9963	4.55373	4.49248	3.86657	4.20902	3.80824	4.35058	TPTEP1	22
ENSG00000100196	2.42986	3.17865	2.65918	1.72156	2.96603	2.96885	1.98379	2.27531	3.2157	2.80304	2.20105	3.69657	KDELR3	22
ENSG00000100201	9.52109	9.7572	9.89318	9.65791	9.40739	9.26361	9.94264	9.41772	9.42828	9.50431	9.25671	9.71712	DDX17	22
ENSG00000100207	5.37063	5.87416	5.70105	5.73027	5.55055	5.32277	5.53072	5.50957	5.67811	5.73503	5.70609	5.57217	TCF20	22
ENSG00000100209	2.42986	3.48211	3.01595	2.72621	3.16626	3.66756	3.44544	3.11804	3.08477	3.26851	3.08288	2.58554	HSCB	22
ENSG00000100211	4.67667	5.03538	5.05225	4.81722	4.67786	4.48947	5.19346	5.21357	4.73125	5.02487	5.1139	4.99211	CBY1	22
ENSG00000100216	5.37063	5.29107	4.80993	4.81722	4.98847	4.66617	4.72472	4.33665	4.90763	4.95963	5.03083	4.92307	TOMM22	22
ENSG00000100219	7.78411	7.3255	7.33147	8.0324	7.4635	7.39082	7.21564	7.30117	7.51962	7.38445	7.13865	6.9139	XBP1	22
ENSG00000100220	6.11809	6.06894	6.04468	6.33609	6.33578	6.6324	6.19906	6.4308	6.23171	6.30691	5.86526	6.203	RTCB	22
ENSG00000100221	5.51607	5.87416	5.71648	6.09874	5.86219	6.10781	5.61635	5.98242	6.15686	6.12432	6.65901	6.24604	JOSD1	22
ENSG00000100225	6.02394	6.45788	6.14126	6.46469	6.57083	6.41322	6.49256	6.4308	6.63916	6.62761	6.36652	6.5507	FBXO7	22
ENSG00000100226	5.57038	6.09602	6.19	6.21735	6.09747	6.22534	5.7771	6.194	6.10229	5.88582	6.10747	6.23313	GTPBP1	22
ENSG00000100227	6.72033	6.72397	6.53434	6.73403	6.43887	6.64183	6.73111	6.71023	6.51389	6.76907	6.81609	6.88366	POLDIP3	22
ENSG00000100228	4.34405	2.50162	4.18291	5.1995	3.31822	2.90764	3.79172	3.73241	2.94076	3.79119	3.8778	3.71154	RAB36	22
ENSG00000100234	9.98936	10.6308	9.96536	10.4749	10.9913	11.4467	9.97744	10.6566	12.1499	10.8835	10.6167	11.4345	TIMP3	22
ENSG00000100239	7.03229	6.53904	6.99837	6.92498	6.44988	6.69713	6.71884	6.40488	6.28167	6.24085	5.92234	6.41785	PPP6R2	22
ENSG00000100241	7.45663	7.27111	7.29079	7.41609	6.72836	6.98699	6.96423	7.07326	6.73272	7.08129	6.92197	7.0199	SBF1	22
ENSG00000100242	7.2308	6.82452	6.75472	7.3075	6.86216	7.37677	6.39681	6.93518	7.15955	6.73648	6.59849	6.36913	SUN2	22
ENSG00000100243	7.52009	7.24715	7.02341	7.14263	6.99966	7.2438	6.69935	6.8222	7.3518	7.23553	6.93181	6.76134	CYB5R3	22
ENSG00000100246	4.21363	3.77798	3.30176	3.62784	3.54055	3.47002	3.79172	3.64652	3.49153	3.4837	3.73516	3.3686	DNAL4	22
ENSG00000100258	6.38374	6.52582	6.46292	6.30148	6.42498	6.3798	6.23642	6.3651	6.49927	6.34277	6.531	6.50204	LMF2	22
ENSG00000100263	5.3397	4.74736	4.78085	4.82374	4.05502	4.48947	4.77298	4.8789	4.29666	4.49769	4.56657	4.90039	RHBDD3	22
ENSG00000100266	7.68914	7.29467	7.09799	7.36002	6.9808	6.8635	6.78421	6.9621	6.90755	6.88983	6.70757	6.98568	PACSIN2	22
ENSG00000100271	2.64757	2.70289	2.37779	1.82914	2.05576	2.633	2.84149	3.11804	2.15517	2.44068	2.64589	2.5692	TTLL1	22
ENSG00000100276	3.41339	1.43066	2.24215	2.41698	0.997939	1.84862	1.5496	2.27531	1.9555	1.35058	0.872111	1.59836	RASL10A	22
ENSG00000100280	7.40527	7.78525	7.50299	7.91827	7.85284	8.22968	8.15529	8.09247	8.26716	7.89653	7.62984	8.18858	AP1B1	22
ENSG00000100281	5.20887	4.65328	5.3744	5.82753	5.1525	5.09466	5.0609	5.15256	5.15146	4.85864	5.25128	5.18943	HMGXB4	22
ENSG00000100284	7.12592	6.48544	6.93379	7.40309	6.50899	6.87554	6.37688	6.72077	6.56566	6.43797	6.35193	6.63456	TOM1	22
ENSG00000100285	0	2.38937	1.88947	2.83346	2.80382	3.47002	3.18506	3.35311	3.52077	2.87012	2.8535	2.6017	NEFH	22
ENSG00000100288	0	0	1.73634	2.45107	1.93555	1.39286	1.19214	0.822287	1.50703	1.21952	0.872111	1.39089	CHKB	22
ENSG00000100292	6.45763	6.84595	5.78153	7.09358	7.13204	7.82868	7.09879	8.00457	7.42323	8.16714	7.57226	7.18046	HMOX1	22
ENSG00000100294	3.63341	3.77798	3.09682	2.72621	3.05526	2.38613	2.64804	3.35311	3.08477	3.14754	2.79717	2.86528	MCAT	22
ENSG00000100296	4.72535	4.13201	4.72088	4.63651	4.61075	4.53065	4.52985	5.12106	4.72498	4.94933	4.88305	4.36485	THOC5	22
ENSG00000100297	6.52793	6.09602	6.21558	6.54578	6.5683	6.65585	6.28478	6.81237	6.70433	6.39686	6.81255	6.37149	MCM5	22
ENSG00000100299	5.88086	5.73181	5.77909	5.97537	5.05489	6.18077	5.50238	4.95234	5.39986	5.2132	5.30782	5.43463	ARSA	22
ENSG00000100300	4.34405	5.19416	4.11464	3.87381	5.01837	5.70199	4.20749	4.54089	4.81034	4.74409	4.04436	4.22583	TSPO	22
ENSG00000100304	4.51992	4.72441	4.45245	4.82374	4.83732	4.84004	4.51371	4.80153	5.24641	5.27226	4.82083	4.37429	TTLL12	22
ENSG00000100307	5.72201	5.8637	5.26667	5.24877	5.30583	5.14856	5.50238	5.18339	5.24641	5.66749	4.53246	4.55525	CBX7	22
ENSG00000100311	6.91127	7.51797	6.97823	7.27695	7.74185	5.50944	6.16846	5.83489	6.14047	6.47794	6.3223	6.15864	PDGFB	22
ENSG00000100316	9.87265	10.1409	9.81601	9.81296	10.0794	9.87777	9.85268	10.328	10.0991	10.2065	10.1741	10.0315	RPL3	22
ENSG00000100319	3.52759	3.30779	3.04885	3.02664	2.45606	3.66756	3.03483	2.27531	3.41573	3.28499	3.21776	2.89181	ZMAT5	22
ENSG00000100320	6.42853	7.45663	7.22395	7.17613	7.08514	6.25636	7.50916	6.85128	7.22763	7.34962	7.54151	7.78019	RBFOX2	22
ENSG00000100321	4.21363	3.73269	4.30367	4.06199	3.38859	4.0254	5.02719	4.33665	3.79657	4.46913	3.85038	4.86402	SYNGR1	22
ENSG00000100324	5.48813	5.53482	5.43476	5.4768	5.31188	5.23829	5.75324	5.24313	5.281	5.47262	5.36223	5.47685	TAB1	22
ENSG00000100325	6.11809	6.03203	5.77909	6.11478	6.04397	6.36849	5.94598	5.85418	6.15453	5.96978	5.56982	5.84752	ASCC2	22
ENSG00000100330	6.55511	6.42266	6.54879	6.72361	6.13207	6.33982	6.82892	6.49365	6.68024	6.372	6.54176	7.11935	MTMR3	22
ENSG00000100335	4.51992	5.33718	5.26317	5.30109	5.33583	5.26294	5.40511	5.48503	5.2288	5.36432	5.44247	5.35346	MIEF1	22
ENSG00000100336	4.07024	4.13201	4.27615	2.57987	2.65949	6.2316	3.73716	4.54089	3.76025	4.57345	2.40329	3.54607	APOL4	22
ENSG00000100342	7.19668	6.51249	6.73717	7.13348	7.2183	9.04033	7.233	7.40944	7.82448	7.38062	6.73032	6.32237	APOL1	22
ENSG00000100345	10.5932	11.3264	10.8835	11.0823	11.2197	10.508	10.7015	10.6177	10.8977	10.9847	11.0934	10.7969	MYH9	22
ENSG00000100347	2.83669	4.3576	3.76471	3.94728	4.39979	4.40341	4.29508	3.81347	4.37079	4.21763	4.33886	3.97607	SAMM50	22
ENSG00000100348	5.62271	5.73181	5.27712	5.43058	5.43338	5.67469	5.52268	5.50957	5.43485	5.36432	5.46524	5.54736	TXN2	22
ENSG00000100350	3.63341	3.82189	4.16051	4.68026	4.76862	5.08086	5.19852	5.08886	5.16541	5.37591	4.8898	4.9134	FOXRED2	22
ENSG00000100351	0	0.885851	0.355949	0.467789	1.87147	3.1906	1.02001	0.822287	1.61943	0.915172	0.977264	0.491186	GRAP2	22
ENSG00000100353	7.01281	7.27506	6.97395	7.07184	7.23749	7.58169	7.24282	7.07326	7.15955	7.15935	6.99108	7.07302	EIF3D	22
ENSG00000100354	5.06498	5.39647	5.23843	5.22435	5.38829	5.29914	5.62764	5.15256	5.75086	5.59993	6.03928	5.80977	TNRC6B	22
ENSG00000100360	3.28936	4.0967	4.09902	4.22844	4.13907	4.16271	4.45576	4.8789	4.29666	4.37218	3.98256	4.21011	IFT27	22
ENSG00000100364	4.90513	5.61187	4.86176	5.31504	6.22795	7.34826	6.16071	5.53369	6.20494	6.12661	5.17596	5.63239	KIAA0930	22
ENSG00000100365	4.98727	5.53482	4.82899	5.0902	5.66366	6.91105	6.19401	5.35568	5.75086	5.83076	4.71838	5.10693	NCF4	22
ENSG00000100368	8.10703	5.69686	7.26915	8.05336	6.12178	7.66727	5.253	6.29625	6.91721	6.60973	5.12538	6.32358	CSF2RB	22
ENSG00000100372	4.67667	3.73269	4.47683	4.45527	4.39979	3.28988	4.22742	4.44238	4.3465	4.41024	4.42504	4.50029	SLC25A17	22
ENSG00000100376	5.20887	5.56096	5.79372	6.4288	4.42233	5.08086	4.70353	3.9631	5.10395	4.6956	4.84187	4.83013	FAM118A	22
ENSG00000100379	5.67321	3.73269	5.72668	6.27319	3.65917	4.57069	3.60629	4.91609	3.61868	4.09212	3.05912	3.45117	KCTD17	22
ENSG00000100380	7.80125	7.8998	7.7673	8.01684	7.85905	7.86536	7.95546	8.20566	7.89527	8.11046	8.0212	7.94399	ST13	22
ENSG00000100385	3.00386	3.17865	2.50177	4.13719	3.85414	6.83912	1.48485	2.48781	6.44501	5.1561	2.88087	5.9362	IL2RB	22
ENSG00000100387	6.28976	4.76996	5.1196	5.78808	4.83732	5.34603	4.9751	5.58077	4.89093	4.94933	4.81375	5.00736	RBX1	22
ENSG00000100393	7.5609	7.41423	7.53091	7.9484	7.05119	7.09388	7.49792	7.28704	7.59973	7.44804	7.48468	7.54716	EP300	22
ENSG00000100395	4.67667	5.19416	5.10403	5.17931	5.34765	5.09466	5.14189	4.54089	5.01941	5.01502	4.97479	5.1787	L3MBTL2	22
ENSG00000100401	6.96293	6.9286	7.13771	7.334	7.04757	6.81015	6.476	6.6996	6.90478	6.67372	6.89873	6.65406	RANGAP1	22
ENSG00000100403	6.70828	7.55747	7.09406	7.41717	7.80754	6.51419	7.1176	6.94421	6.90478	7.0575	6.91371	7.10028	ZC3H7B	22
ENSG00000100410	4.40509	4.38713	3.99314	4.29563	4.43347	4.51021	3.85714	4.09865	3.87791	4.2347	4.26809	4.20483	PHF5A	22
ENSG00000100412	6.80204	6.48544	6.82761	7.25421	6.66362	6.78909	6.65405	6.53008	6.74826	6.69391	6.74714	6.82637	ACO2	22
ENSG00000100413	4.90513	4.60383	4.67947	4.70872	4.38839	4.60964	4.60795	4.84074	4.50121	4.63903	4.33886	4.42056	POLR3H	22
ENSG00000100416	5.02665	5.35223	5.57686	5.48093	4.76862	5.43548	5.21857	5.02221	5.02961	4.94415	4.81375	4.98905	TRMU	22
ENSG00000100417	4.14372	4.52633	4.27615	4.21859	4.32998	4.28807	4.23728	4.95234	4.73125	4.44733	5.06105	4.71602	PMM1	22
ENSG00000100418	5.43058	4.67738	5.02358	4.81068	4.59099	5.09466	4.62307	4.54089	4.76829	4.55318	4.46174	4.88727	DESI1	22
ENSG00000100422	4.46365	5.64891	4.91179	4.95423	5.90283	5.33445	5.16274	4.58774	5.11358	5.48693	5.10232	5.06385	CERK	22
ENSG00000100425	6.42853	6.27253	6.36835	6.52393	5.95401	5.74636	5.90015	6.20906	5.95208	5.94407	5.77699	5.91858	BRD1	22
ENSG00000100426	3.41339	4.62877	4.52438	4.68743	4.733	4.93512	4.24707	4.8789	4.82213	4.47632	4.33886	4.56352	ZBED4	22
ENSG00000100427	0.908952	3.42631	2.70117	2.80739	4.25662	4.0254	3.8825	4.16193	2.62791	2.82575	3.89132	4.19953	MLC1	22
ENSG00000100439	4.67667	4.83569	5.01943	5.02947	4.84568	4.82357	5.26751	4.91609	5.21991	5.18273	5.50974	5.40271	ABHD4	14
ENSG00000100441	7.4494	7.86612	7.37346	7.43111	7.55941	7.05207	7.77088	7.54617	7.41643	7.71229	7.68716	7.73191	KHNYN	14
ENSG00000100442	5.10232	5.52156	5.34821	5.45598	5.72387	5.4782	5.80389	5.87321	5.4194	5.61305	5.91904	5.69398	FKBP3	14
ENSG00000100445	5.62271	4.99759	5.23486	5.44333	4.9109	4.82357	4.70353	4.54089	4.65418	4.85312	4.76318	4.87735	SDR39U1	14
ENSG00000100450	0.908952	0	0.45744	0.328062	1.66014	2.633	0.174395	1.34279	1.10528	1.7807	0	0.0943711	GZMH	14
ENSG00000100453	0.908952	0	0.45744	1.01529	2.58153	5.23829	0.174395	1.34279	3.00424	2.1837	0.635577	0.802068	GZMB	14
ENSG00000100461	6.94249	6.53904	6.8288	7.07867	6.26583	6.53963	6.54909	6.56562	6.45452	6.61463	6.90207	6.63848	RBM23	14
ENSG00000100462	5.45964	5.73181	5.53103	5.68445	5.32988	5.28717	5.37862	5.3005	5.20197	5.2175	5.51412	5.46586	PRMT5	14
ENSG00000100473	3.15366	0.885851	1.60979	1.77635	0.872596	2.19445	3.07938	2.67298	0.94195	2.14811	2.06453	1.83544	COCH	14
ENSG00000100478	3.52759	3.98527	3.41963	3.79638	3.54055	3.02756	3.79172	3.9631	3.47669	3.55339	3.36066	3.44223	AP4S1	14
ENSG00000100479	0.908952	0.885851	2.21343	2.19363	2.87091	2.08813	1.671	2.02603	1.99771	1.95562	2.76816	2.19623	POLE2	14
ENSG00000100483	4.07024	3.24467	3.77458	3.36729	2.93501	2.55531	3.4956	2.67298	2.65454	2.77997	3.28074	3.02956	VCPKMT	14
ENSG00000100485	6.27348	5.79926	6.74597	6.92498	6.01831	5.66548	5.69001	5.73439	5.74158	5.78224	5.86526	5.94731	SOS2	14
ENSG00000100490	3.52759	3.58762	2.85788	3.40255	3.1393	4.46843	5.29138	4.39049	3.57753	4.62615	3.17418	3.08807	CDKL1	14
ENSG00000100503	6.92175	6.35703	6.70528	7.0217	6.73963	6.65585	6.56484	6.65631	6.53733	6.50985	6.46247	6.44273	NIN	14
ENSG00000100504	5.37063	6.71817	5.69326	6.43732	7.11312	7.34538	7.55916	6.8222	7.13848	6.96719	6.54604	6.48798	PYGL	14
ENSG00000100505	1.86118	0.885851	0.8793	0.595171	2.05576	1.7121	2.11795	0.822287	1.91202	0.997486	0	0.802068	TRIM9	14
ENSG00000100519	5.98448	5.58664	6.11238	6.48334	6.32086	5.92685	5.95497	6.0675	6.06556	6.21957	6.40708	6.33087	PSMC6	14
ENSG00000100522	4.07024	4.38713	4.23386	4.39527	4.88679	4.31189	4.17707	3.89022	4.4413	4.5868	4.51511	4.47858	GNPNAT1	14
ENSG00000100523	4.40509	4.95879	5.39053	4.70166	4.854	5.311	5.32876	4.95234	5.02452	4.81957	5.24603	5.44586	DDHD1	14
ENSG00000100526	2.17336	0.885851	1.31754	1.41122	2.26975	2.633	1.41705	2.27531	2.54495	1.35058	3.15189	1.19181	CDKN3	14
ENSG00000100528	4.81804	5.19416	4.94712	4.95423	5.71933	4.93512	4.99267	5.12106	5.18381	5.15161	5.46976	5.2573	CNIH1	14
ENSG00000100532	1.86118	3.17865	2.76194	2.57987	2.96603	2.70671	3.01203	3.24036	2.54495	3.33334	3.36066	2.5692	CGRRF1	14
ENSG00000100554	5.57038	4.89855	4.96014	5.38282	5.2248	5.311	4.79985	5.08886	5.35592	5.16057	5.05506	5.44362	ATP6V1D	14
ENSG00000100564	4.34405	3.73269	4.14538	4.79085	4.08358	3.77427	3.68046	3.64652	3.35208	3.74428	3.47281	3.65846	PIGH	14
ENSG00000100567	5.88086	5.57386	5.77418	5.88787	5.88266	6.05234	5.51864	5.83489	5.55278	5.69242	5.77334	5.68642	PSMA3	14
ENSG00000100568	5.88086	5.72025	5.32154	5.43058	5.48782	5.457	5.14713	5.60374	5.48021	5.51864	5.31787	5.39346	VTI1B	14
ENSG00000100575	4.21363	3.58762	3.41963	3.07115	3.67802	3.33707	3.70909	3.55519	3.59138	3.76793	4.01996	3.5208	TIMM9	14
ENSG00000100577	4.90513	3.10948	4.03479	4.15797	3.4113	3.13827	3.93192	3.89022	3.85514	3.61987	3.91798	3.67383	GSTZ1	14
ENSG00000100578	3.15366	3.63761	3.72455	3.36729	4.31801	4.0254	4.35065	3.45768	4.16395	4.01518	4.23667	4.10635	KIAA0586	14
[truncated: 13,452 more rows]
